# Supplementary material for: Photoredox-catalyzed aminofluorosulfonylation of unactivated olefins
Source: Royal Society of Chemistry journal article supplement (doi:10.1039/d1sc02503a), 2021-01-01

# Photoredox-Catalyzed Aminofluorosulfonylation of Unactivated Olefins

Tao Zhong, Ji-Tao Yi, Zhi-Da Chen, Quan-Can Zhuang, Yong-Zhao Li, Gui Lu, and Jiang Weng\*

*Guangdong Provincial Key Laboratory of Chiral Molecule and Drug Discovery, School of Pharmaceutical Sciences, Sun Yat-sen University, Guangzhou, 510006, P.R. China.*

## Table of Contents

|                                                                                                     |            |
|-----------------------------------------------------------------------------------------------------|------------|
| <b>1. General Information .....</b>                                                                 | <b>S3</b>  |
| <b>2. Typical Procedure for the Synthesis of Substrates.....</b>                                    | <b>S3</b>  |
| <b>3. Procedure for the Synthesis of Intermediates.....</b>                                         | <b>S5</b>  |
| <b>4. Details for Optimization of Reaction Conditions.....</b>                                      | <b>S6</b>  |
| <b>5. General Procedure for the Synthesis of Sulfonyl Fluorides .....</b>                           | <b>S12</b> |
| <b>6. Derivatization Reactions of Sulfonyl Fluorides.....</b>                                       | <b>S13</b> |
| <b>7. Mechanistic Experiments.....</b>                                                              | <b>S16</b> |
| <b>8. Stern-Volmer studies.....</b>                                                                 | <b>S19</b> |
| <b>9. Large-scale Experiments.....</b>                                                              | <b>S25</b> |
| <b>10. Characterization Data of Compounds 1d, 1e, 1l-1r, 1t-1ad, 1af-1ao, 2a-2ao, D1-D14, S5...</b> | <b>S26</b> |
| <b>11. References.....</b>                                                                          | <b>S48</b> |
| <b>12. NMR Spectra of Compounds 1d, 1e, 1l-1r, 1t-1ad, 1af-1ao, 2a-2ao, D1-D14, S5.....</b>         | <b>S49</b> |

## 1. General Information

All the commercial reagents were used as such without further purification. All solvents were used as commercial anhydrous grade without further purification. The flash column chromatography was carried out over silica gel (230-400 mesh).  $^1\text{H}$ ,  $^{13}\text{C}$  and  $^{19}\text{F}$  NMR spectra were recorded on a Bruker Avance-300 MHz spectrometer or Bruker Avance-400 MHz spectrometer or Bruker Avance-500 MHz spectrometer. Chemical shifts in  $^1\text{H}$  NMR spectra were reported in parts per million (ppm,  $\delta$ ) downfield from the internal standard  $\text{Me}_4\text{Si}$  (TMS,  $\delta = 0$  ppm). Chemical shifts in  $^{13}\text{C}$  NMR spectra were reported relative to the central line of the chloroform signal ( $\delta = 77.0$  ppm). Peaks were labeled as singlet (s), doublet (d), triplet (t), quartet (q), and multiplet (m). Low resolution mass spectrometry (LRMS) was performed on a Fisons Platform spectrometer (ESI). High resolution mass spectrometry (HRMS) was performed via electron ionisation (EI) or electrospray ionisation (ESI) sources. The  $m/z$  ratios are reported in Daltons; high resolution values are calculated to four decimal places from the molecular formula. Chemical yields refer to pure isolated substances.

## 2. Typical Procedure for the Synthesis of Substrates

**Method A:**<sup>[1]</sup> (Scheme S1). A flame-dried round-bottomed flask was degassed, flushed with nitrogen, and charged with dry DCM (6.25 mL, 0.4 M), EDC-HCl (1-(3-dimethylaminopropyl)-3-ethylcarbodiimide hydrochloride, 3.25 mmol, 1.3 eq.), and DMAP (3.5 mmol, 1.4 eq.). The reaction flask was cooled to 0 °C and then the carboxylic acid (2.5 mmol, 1.0 eq.) was added. After five minutes of stirring, the substituted aniline (3 mmol, 1.2 eq.) was added. The ice bath was then removed and the reaction mixture was stirred overnight. Upon completion of reaction (monitored by TLC), the mixture was washed with 1 M HCl and the aqueous layer was extracted with dichloromethane or ethyl acetate for three times. The combined organic layer was washed with brine and dried with  $\text{Na}_2\text{SO}_4$ . The crude product was purified by silica gel column chromatography to afford the desired product.

**Scheme S1.** Preparation of aryl amide (**Method A**)

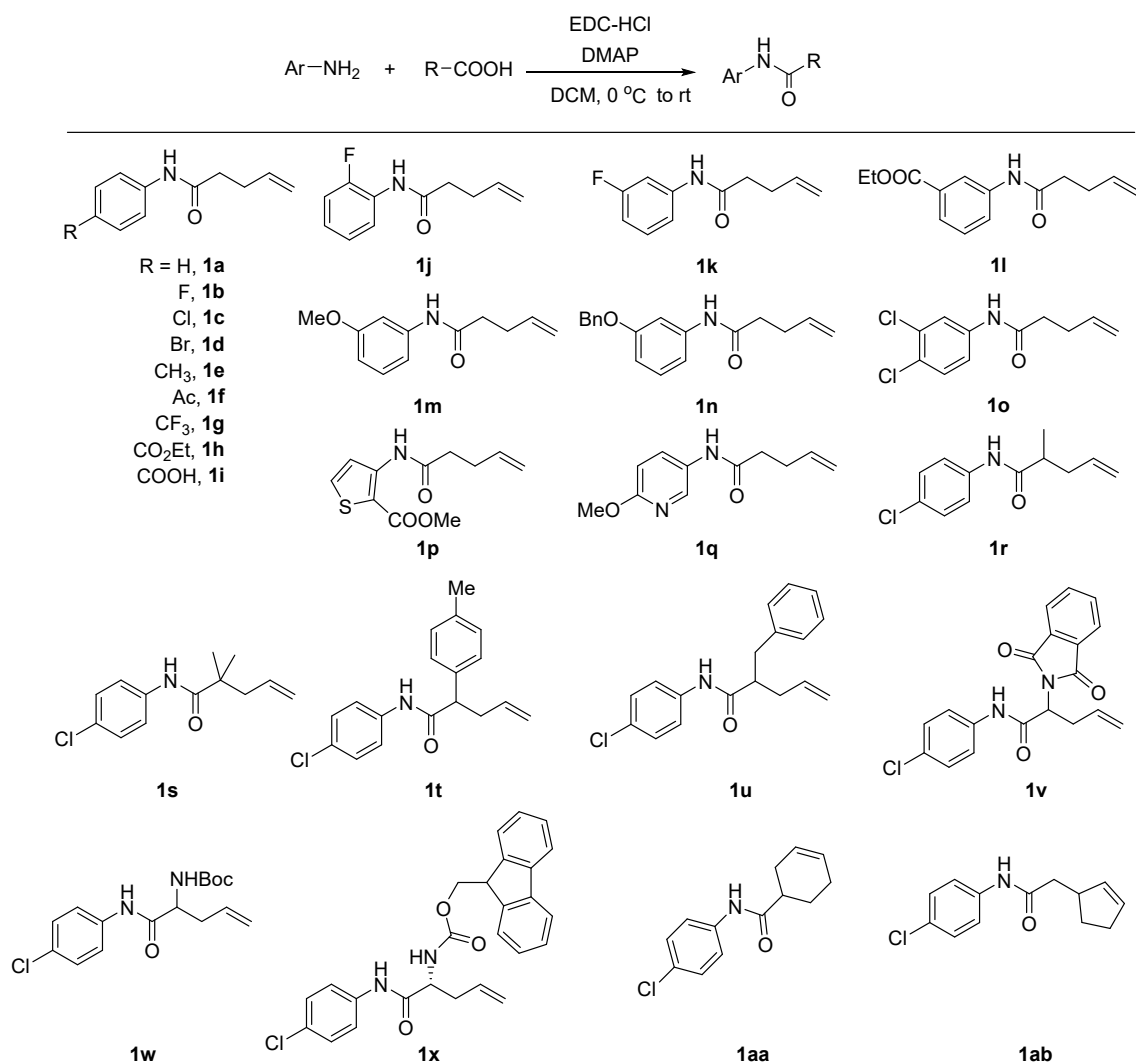

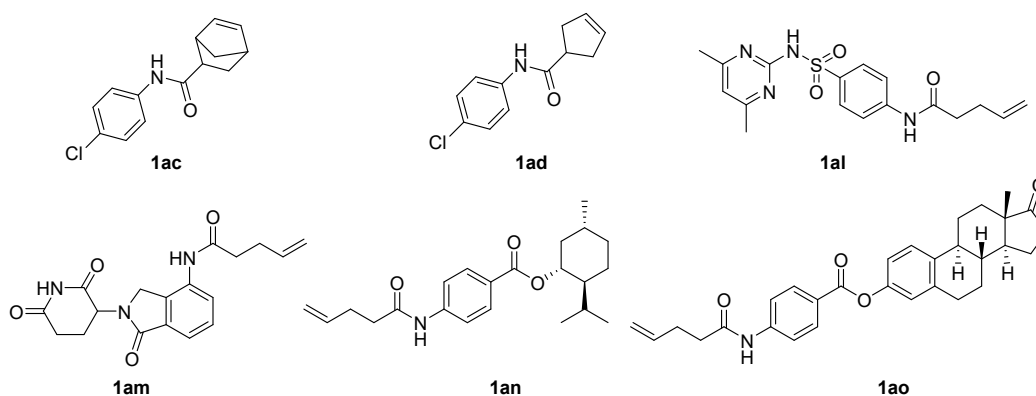

**Method B:**<sup>[1]</sup> (Scheme S2). A flame-dried round-bottomed flask was degassed, flushed with nitrogen, and charged with phenyl isocyanate (2.5 mmol, 1 eq.), dry DCM (5 mL), Et<sub>3</sub>N (7.5 mmol, 1.1 eq.) and alcohol/amine (2.5 mmol, 1 eq.). The reaction mixture was stirred at room temperature until the alcohol/amine was fully consumed (monitored by TLC). The reaction mixture was washed with 1 M HCl, water and brine and then dried with Na<sub>2</sub>SO<sub>4</sub>. Then, the organic phase was concentrated under reduced pressure. The crude product was purified by silica gel column chromatography to afford the desired product.

**Scheme S2.** Preparation of phenyl Carbamate/urea (**Method B**)

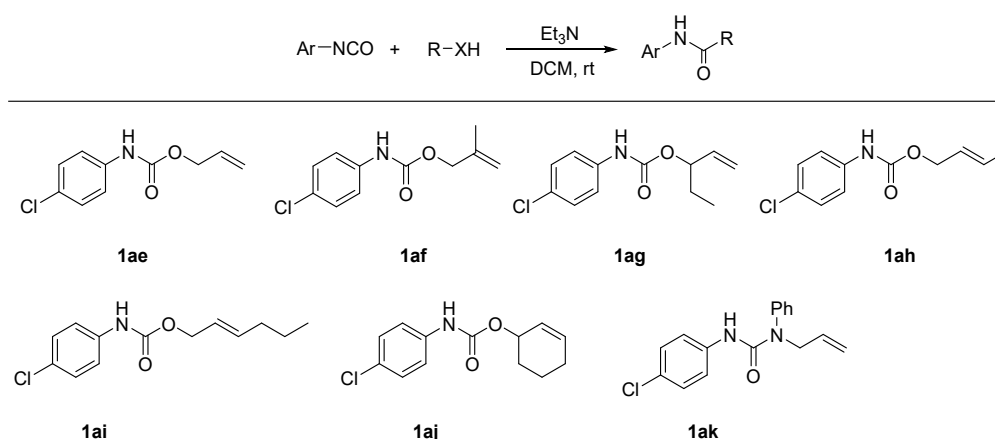

**Method C:**<sup>[2]</sup> (Scheme S3). A flame-dried round-bottomed flask was degassed, flushed with nitrogen, and charged with (3-carboxypropyl)triphenylphosphonium bromide (3 mmol, 1 eq.) and suspended in dry THF (1.0 M). The mixture was cooled to 0 °C followed by slow addition of NaHMDS (3 mL, 2.0 M in THF). After 30 minutes of stirring, the corresponding aldehyde was subsequently added dropwise into the reaction (3.6 mmol, 1.2 eq.). The reaction was left to slowly warm to room temperature overnight until starting material was consumed (monitored by TLC). The reaction mixture was quenched by a solution of saturated ammonium chloride solution and the pH was adjusted to 2 by addition of 2 M HCl. Then the aqueous layer was extracted with 50 mL ethyl acetate. After concentrating the organic phase, the residue was directly used in the next step without purification. The reaction flask was degassed, flushed with nitrogen, and charged with CDI (3 mmol, 1.0 eq.) and a solution of the corresponding carboxylic acid (1.0 eq.) in dry THF (1.0 M). After 1 h of stirring, the substituted aniline (3 mmol, 1.0 eq.) was added and the reaction mixture was subsequently stirred overnight. Upon completion of reaction (monitored by TLC), the reaction mixture was taken to dryness under reduced pressure. The crude product was purified by silica gel column chromatography to afford the desired product.

**Scheme S3. Preparation of aryl amide (Method C)**

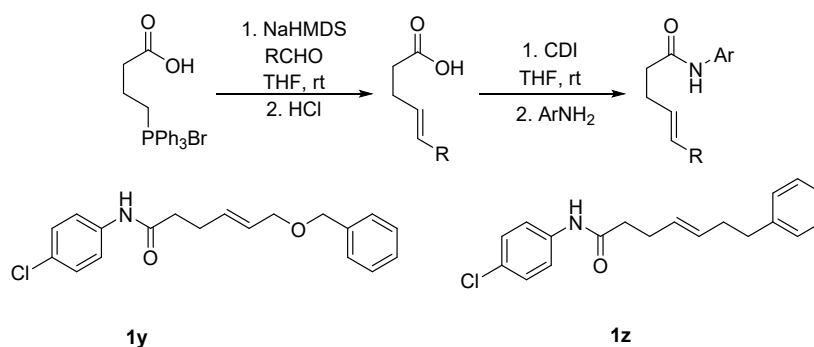

**3. Procedure for the Synthesis of Intermediates**

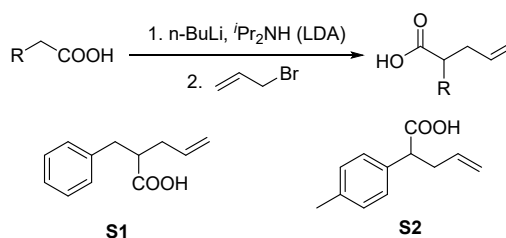

**S1** and **S2** were synthesized according to the method of literature.<sup>[3]</sup> *n*-BuLi (13 mL, 1.6 M in hexane, 21 mmol) was added dropwise to a cold (0 °C) solution of *i*Pr<sub>2</sub>NH (3.0 mL, 21 mmol) in THF (10 mL), and the mixture was stirred for 30 minutes. Then, a solution of carboxylic acid (10 mmol) in THF (10 mL) was added dropwise over 20 minutes and stirring was continued for another 30 minutes at the same temperature. Allyl bromide (0.9 mL, 10.5 mmol) was added, and the stirring was continued for another 6 h. The solvent was removed under reduced pressure. The resulting residue was diluted with water (50 mL) and extracted with ethyl acetate (50 mL). The pH value of the separated aqueous layer was adjusted to 2 by 6 M HCl and then extracted with ethyl acetate. The combined organic layers were washed with brine, dried with Na<sub>2</sub>SO<sub>4</sub>, and filtered. The solvent was evaporated, and the crude acid was taken forward to the next step without further purification.

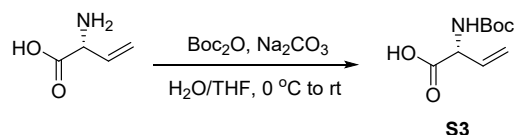

**S3** was synthesized according to the method of literature.<sup>[4]</sup> To a solution of L-allylglycine (576 mg, 5 mmol) in THF/H<sub>2</sub>O (10:1, 11 mL) at 0 °C were added Boc<sub>2</sub>O (1.20 g, 5.5 mmol) and Na<sub>2</sub>CO<sub>3</sub> (1.06 g, 10 mmol). The reaction was stirred for 16 h at room temperature, after which the reaction mixture was acidified to pH 2 with 2 M HCl and extracted with ethyl acetate. The combined organic layers were washed with brine, dried Na<sub>2</sub>SO<sub>4</sub>, filtered, and the solvent was removed in vacuo to afford crude (S)-2-((tert-butoxycarbonyl)amino)pent-4-enoic acid as a colorless oil.

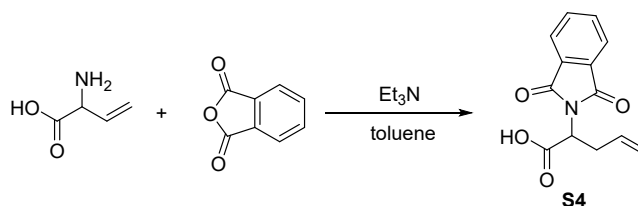

**S4** is synthesized according to the method of literature.<sup>[4]</sup> To a round-bottom flask equipped with a magnetic stir bar was added D/L-2-allylglycine (576 mg, 5 mmol). The flask was evacuated and back-filled with nitrogen three times, and Et<sub>3</sub>N (1.39 mL, 10 mmol), toluene (33.3 mL, 0.15 M), and phthalic anhydride (1.481g, 10 mmol) were added. The flask was then fitted with a Dean–Stark



apparatus and refluxed at 140 °C for 16 h. The crude reaction mixture was then concentrated in vacuo, acidified with water and HCl, then extracted into ethyl acetate and washed with water. After concentrating in vacuo, the crude solid was dissolved in aqueous K<sub>2</sub>CO<sub>3</sub>, washed with ether. The aqueous layer was acidified with HCl and extracted with ethyl acetate. The organic layers were dried over Na<sub>2</sub>SO<sub>4</sub> and concentrated in vacuo to afford crude racemic **S4**.

#### 4. Details for Optimization of Reaction Conditions

**Table S1. Initial evaluation of solvents and fluorine sources (Na<sub>2</sub>S<sub>2</sub>O<sub>5</sub> as the SO<sub>2</sub> surrogate)**

$\text{1a} + \text{Na}_2\text{S}_2\text{O}_5 + \text{F sources} \xrightarrow[\text{12 w blue LED * 2 rt, N}_2, \text{10 h}]{\text{PC-II 1.0 mol\% DMAP (0.4 eq.) solvent}}$ 
 $\text{2a}$

**PC-II:**  $[\text{Ir}(\text{dF}(\text{CF}_3)\text{ppy})_2(\text{bpy})]\text{PF}_6$

| Entry <sup>[a]</sup> | SO <sub>2</sub>                                 | F source           | Solvent (1 mL)    | Yield <sup>[b]</sup> (%) |
|----------------------|-------------------------------------------------|--------------------|-------------------|--------------------------|
| 1                    | Na <sub>2</sub> S <sub>2</sub> O <sub>5</sub>   | Selectfluor        | PhCF <sub>3</sub> | trace                    |
| 2                    | <b>Na<sub>2</sub>S<sub>2</sub>O<sub>5</sub></b> | <b>Selectfluor</b> | <b>MeCN</b>       | <b>16</b>                |
| 3                    | Na <sub>2</sub> S <sub>2</sub> O <sub>5</sub>   | Selectfluor        | DCE               | trace                    |
| 4                    | Na <sub>2</sub> S <sub>2</sub> O <sub>5</sub>   | Selectfluor        | DMSO              | ND                       |
| 5                    | Na <sub>2</sub> S <sub>2</sub> O <sub>5</sub>   | NFSI               | PhCF <sub>3</sub> | ND                       |
| 6                    | Na <sub>2</sub> S <sub>2</sub> O <sub>5</sub>   | NFSI               | MeCN              | trace                    |
| 7                    | Na <sub>2</sub> S <sub>2</sub> O <sub>5</sub>   | NFSI               | DCE               | trace                    |
| 8                    | Na <sub>2</sub> S <sub>2</sub> O <sub>5</sub>   | NFSI               | DMSO              | ND                       |

[a]: Reaction conditions: **1a** (0.1 mmol), **Na<sub>2</sub>S<sub>2</sub>O<sub>5</sub>** (0.2 mmol, 2.0 eq.), **F sources** (0.2 mmol, 2.0 eq.), PC, base in 1.0 mL solvent under N<sub>2</sub> atmosphere; [b]: <sup>19</sup>F NMR yields calculated with PhCF<sub>3</sub> as internal standard;

Table S2. Initial evaluation of base

Reaction scheme showing the conversion of **1a** to **2a** using  $\text{Na}_2\text{S}_2\text{O}_5$ , **Selectfluor**, and PC-II (1.0 mol% base) in MeCN under blue LED light (12 h) and  $\text{N}_2$  atmosphere.

| Entry <sup>[a]</sup> | Base (1.1 eq.)            | Additive (1.5 eq.) | Solvent (1 mL) | Yield <sup>[b]</sup> (%) |
|----------------------|---------------------------|--------------------|----------------|--------------------------|
| 1                    | DMAP (0.4 eq.)            |                    | MeCN           | 16                       |
| 2                    | DMAP                      |                    | MeCN           | 11                       |
| 3                    | $\text{K}_2\text{CO}_3$   |                    | MeCN (2 mL)    | 21                       |
| 4                    | $\text{Na}_2\text{HPO}_4$ |                    | MeCN (2 mL)    | trace                    |
| 5                    | DMAP (0.4 eq.)            | TBAI               | MeCN (2 mL)    | ND                       |

[a]: Reaction conditions: **1a** (0.1 mmol),  $\text{Na}_2\text{S}_2\text{O}_5$  (0.2 mmol, 2.0 eq.), **Selectfluor** (0.2 mmol, 2.0 eq.), PC, base in MeCN under  $\text{N}_2$  atmosphere; [b]:  $^{19}\text{F}$  NMR yields calculated with  $\text{PhCF}_3$  as internal standard;

Table S3. Evaluation of base and fluorine sources (DABSO as the  $\text{SO}_2$  surrogate)

Reaction scheme showing the conversion of **1a** to **2a** using **DABSO** and **F sources**, PC-II (1.0 mol% base) in MeCN (2 mL) under blue LED light (12 h) and  $\text{N}_2$  atmosphere.

| Entry <sup>[a]</sup> | $\text{SO}_2$          | F source    | Base (1.1 eq.)                            | Solvent (2 mL) | Yield <sup>[b]</sup> (%) |
|----------------------|------------------------|-------------|-------------------------------------------|----------------|--------------------------|
| 1                    | DABSO                  | Selectfluor | DMAP                                      | MeCN           | trace                    |
| 2                    | DABSO                  | Selectfluor | $\text{K}_2\text{CO}_3$                   | MeCN           | trace                    |
| 3                    | DABSO                  | NFSI        | DMAP                                      | MeCN           | trace                    |
| 4                    | <b>DABSO</b>           | <b>NFSI</b> | <b><math>\text{K}_2\text{CO}_3</math></b> | <b>MeCN</b>    | <b>41</b>                |
| 5                    | variation from entry 4 |             | without PC                                |                | N.D.                     |
| 6                    | variation from entry 4 |             | without light                             |                | N.D.                     |

[a]: Reaction conditions: **1a** (0.1 mmol), **DABSO** (0.15 mmol, 1.5 eq.), **F sources** (0.2 mmol, 2.0 eq.), PC, base in 2.0 mL MeCN under  $\text{N}_2$  atmosphere; [b]:  $^{19}\text{F}$  NMR yields calculated with  $\text{PhCF}_3$  as internal standard;

**Table S4. Evaluation of varying amounts of the substrates**

CC=CC(=O)Nc1ccccc1 + DABSO + NFSI  $\xrightarrow[\text{rt, N}_2, 10 \text{ h}]{\text{PC-II 1.0 mol\%, K}_2\text{CO}_3 (1.1 \text{ eq.}), \text{MeCN (2 mL)}}$  CC=CC(=O)Nc1ccccc1S(=O)(=O)F

**1a**  **2a**

| Entry <sup>[a]</sup> | DABSO          | NFSI           | Yield <sup>[b]</sup> (%) |
|----------------------|----------------|----------------|--------------------------|
| 1                    | 1.0 eq.        | 2.0 eq.        | 28                       |
| 2                    | 2.0 eq.        | 2.0 eq.        | 30                       |
| 3 <sup>[c]</sup>     | 1.5 eq.        | 2.0 eq.        | 13                       |
| 4                    | 1.5 eq.        | 1.1 eq.        | trace                    |
| 5                    | 1.5 eq.        | 1.5 eq.        | 42                       |
| <b>6</b>             | <b>1.5 eq.</b> | <b>2.0 eq.</b> | <b>45</b>                |
| 7                    | 1.5 eq.        | 2.5 eq.        | 44                       |
| 8                    | 1.5 eq.        | 3.0 eq.        | 45                       |

[a]: Reaction conditions: **1a** (0.1 mmol), **DABCO** (X eq.), **NFSI** (Y eq.), PC, K<sub>2</sub>CO<sub>3</sub> (1.1 eq.) in 2.0 mL MeCN under N<sub>2</sub> atmosphere; [b]: <sup>19</sup>F NMR yields calculated with PhCF<sub>3</sub> as internal standard; [c]: 0.5 mL H<sub>2</sub>O was added.

**Table S5. Further evaluation of the base**

| Entry <sup>[a]</sup> | Base<br>(1.1 eq.)                                 | Yield <sup>[b]</sup><br>(%) |
|----------------------|---------------------------------------------------|-----------------------------|
| 1                    | K <sub>2</sub> CO <sub>3</sub>                    | 45                          |
| 2                    | Na <sub>2</sub> CO <sub>3</sub>                   | 44                          |
| 3                    | K <sub>3</sub> PO <sub>4</sub> ·3H <sub>2</sub> O | 42                          |
| 4                    | Et <sub>3</sub> N                                 | <10                         |
| 5                    | Cs <sub>2</sub> CO <sub>3</sub>                   | <20                         |
| 6                    | KOH                                               | 33                          |
| 7                    | DABCO                                             | <20                         |
| 8                    | Imidazole                                         | 33                          |
| 9                    | KOAc                                              | 37                          |
| 10                   | K <sub>2</sub> HPO <sub>4</sub>                   | 22                          |
| 11                   | NaHCO <sub>3</sub>                                | 22                          |
| <b>12</b>            | <b>K<sub>3</sub>PO<sub>4</sub></b>                | <b>48</b>                   |
| 13                   | CaCO <sub>3</sub>                                 | 34                          |

[a]: Reaction conditions: **1a** (0.1 mmol), **DABSO** (0.15 mmol, 1.5 eq.), **NFSI** (0.2 mmol, 2.0 eq.), PC, base in 2.0 mL MeCN under N<sub>2</sub> atmosphere; [b]: <sup>19</sup>F NMR yields calculated with PhCF<sub>3</sub> as internal standard;

**Table S6. Evaluation of the reaction concentration**

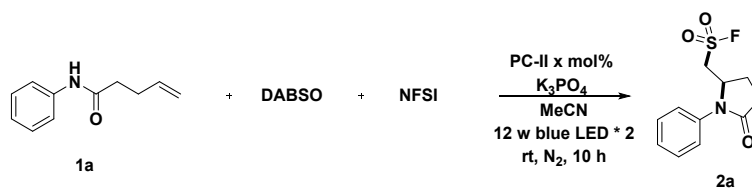

| Entry <sup>[a]</sup> | Base<br>(1.1 eq.)                            | PC              | Solvent<br>2 mL    | Yield <sup>[b]</sup><br>(%) |
|----------------------|----------------------------------------------|-----------------|--------------------|-----------------------------|
| 1                    | K <sub>3</sub> PO <sub>4</sub>               | 1 mol%          | MeCN               | 48                          |
| 2                    | K <sub>3</sub> PO <sub>4</sub>               | 1.5 mol%        | MeCN               | 51                          |
| 3                    | K <sub>3</sub> PO <sub>4</sub>               | 2.0 mol%        | MeCN               | 48                          |
| 4                    | K <sub>3</sub> PO <sub>4</sub>               | 1.5 mol%        | MeCN (3 mL)        | 53                          |
| 5                    | K <sub>3</sub> PO <sub>4</sub>               | 1.5 mol%        | MeCN (4 mL)        | 60                          |
| 6                    | K <sub>3</sub> PO <sub>4</sub>               | 1.5 mol%        | MeCN (5 mL)        | 54                          |
| <b>7</b>             | <b>K<sub>3</sub>PO<sub>4</sub> (1.0 eq.)</b> | <b>1.5 mol%</b> | <b>MeCN (4 mL)</b> | <b>64</b>                   |
| 8                    | K <sub>3</sub> PO <sub>4</sub> (1.2 eq.)     | 1.5 mol%        | MeCN (4 mL)        | 50                          |
| 9                    | K <sub>3</sub> PO <sub>4</sub> (1.3 eq.)     | 1.5 mol%        | MeCN (4 mL)        | 47                          |
| 10                   | K <sub>3</sub> PO <sub>4</sub> (1.5 eq.)     | 1.5 mol%        | MeCN (4 mL)        | 48                          |
| 11                   | K <sub>3</sub> PO <sub>4</sub> (2.0 eq.)     | 1.5 mol%        | MeCN (4 mL)        | 49                          |

[a]: Reaction conditions: **1a** (0.1 mmol), **DABSO** (0.15 mmol, 1.5 eq.), **NFSI** (0.2 mmol, 2.0 eq.), PC, base in MeCN under N<sub>2</sub> atmosphere; [b]: <sup>19</sup>F NMR yields calculated with PhCF<sub>3</sub> as internal standard;

**Table S7. Selected optimization experiments**

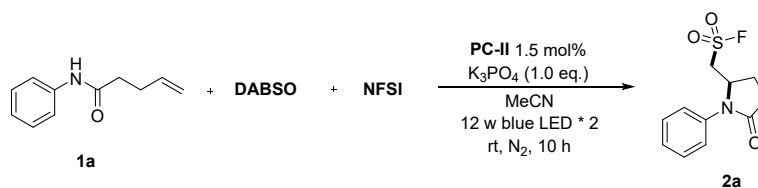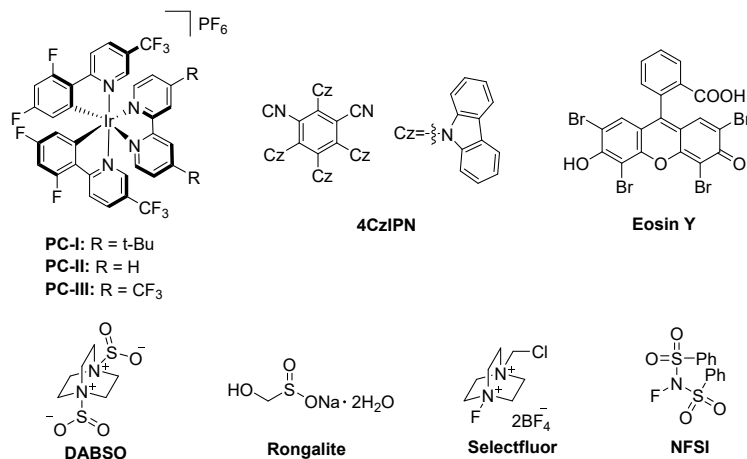

| entry | variation from the standard conditions <sup>[a]</sup>                                 | yield (%) <sup>[b]</sup> |
|-------|---------------------------------------------------------------------------------------|--------------------------|
| 1     | none                                                                                  | 64 (60) <sup>[c]</sup>   |
| 2     | <b>PC-I</b> instead of <b>PC-II</b>                                                   | 30                       |
| 3     | <b>PC-III</b> instead of <b>PC-II</b>                                                 | 45                       |
| 4     | <b>4CzIPN</b> instead of <b>PC-II</b>                                                 | 50                       |
| 5     | <b>Eosin Y</b> instead of <b>PC-II</b>                                                | N.D.                     |
| 6     | <b>[Ru(bpy)<sub>3</sub>]Cl<sub>2</sub></b> instead of <b>PC-II</b>                    | trace                    |
| 7     | Selectfluor instead of NFSI                                                           | trace                    |
| 8     | Na <sub>2</sub> S <sub>2</sub> O <sub>5</sub> instead of DABSO                        | trace                    |
| 9     | Rongalite instead of DABSO                                                            | N.D.                     |
| 10    | K <sub>2</sub> CO <sub>3</sub> instead of K <sub>3</sub> PO <sub>4</sub>              | 55                       |
| 11    | Bu <sub>4</sub> N[OP(O)(OMe) <sub>2</sub> ] instead of K <sub>3</sub> PO <sub>4</sub> | trace                    |
| 12    | without <b>PC 2</b>                                                                   | N.D.                     |
| 13    | without light                                                                         | N.D.                     |
| 14    | without base                                                                          | 50                       |

[a]: Reaction conditions: **1a** (0.1 mmol), **DABSO** (0.15 mmol, 1.5 eq.), **NFSI** (0.2 mmol, 2.0 eq.), PC,  $K_3PO_4$  in 4.0 mL MeCN under  $N_2$  atmosphere; [b]:  $^{19}F$  NMR yields calculated with  $PhCF_3$  as internal standard; [c]: Isolated yield.

## 5. General Procedure for the Synthesis of Sulfonyl Fluorides **2**

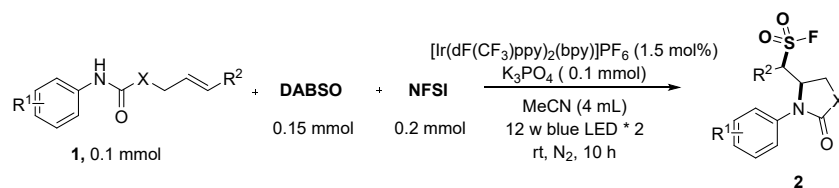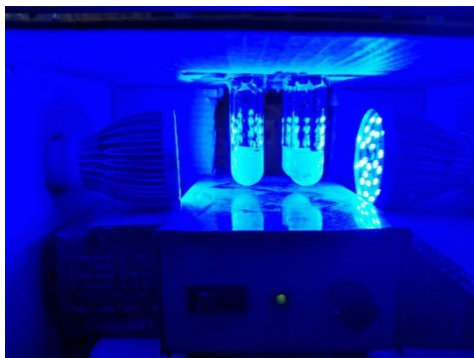

**General Procedure:** Under  $\text{N}_2$  atmosphere, a 10 mL reaction tube was charged with amides **1** (0.1 mmol, 1.0 eq.), DABSO (36.1 mg, 0.15 mmol, 1.5 eq.), NFSI (63.1 mg, 0.2 mmol, 2.0 eq.),  $[\text{Ir}(\text{dF}(\text{CF}_3)\text{ppy})_2(\text{bpy})]\text{PF}_6$  (1.5 mg, 1.5 mol%),  $\text{K}_3\text{PO}_4$  (21.3 mg, 0.1 mmol, 1.0 eq.) and MeCN (4.0 mL), and the reaction mixture was irradiated with two 12 W blue lamps and the heat from light was blown away by fan. After stirring at room temperature for 10 h, the reaction mixture was filtered through a pad of celite, eluted with ethyl acetate, concentrated, and purified by flash column chromatography (eluent: petroleum ether/ethyl acetate) on silica gel to give the desired product **2**.

## 6. Derivatization Reactions of Sulfonyl Fluorides

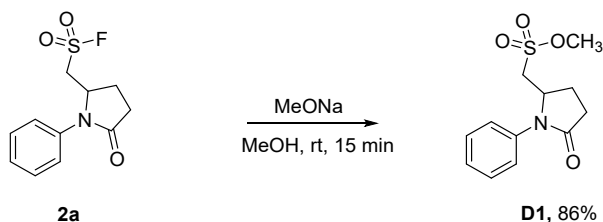

To an oven-dried sealed tube equipped with a magnetic stir bar were added sulfonyl fluoride **2a** (25.7 mg, 0.1 mmol, 1.0 eq.), MeONa (27 mg, 0.5 mmol, 5 eq.) and methanol (0.5 mL) under N<sub>2</sub> atmosphere. The mixture was stirred at room temperature for 15 minutes. After removal of the solvent under reduced pressure with a rotary evaporator, the crude product was purified by column chromatography on silica gel (petroleum ether/ethyl acetate 3:1) to give a white solid **D1** (23.2 mg, 86% yield).<sup>[5]</sup>

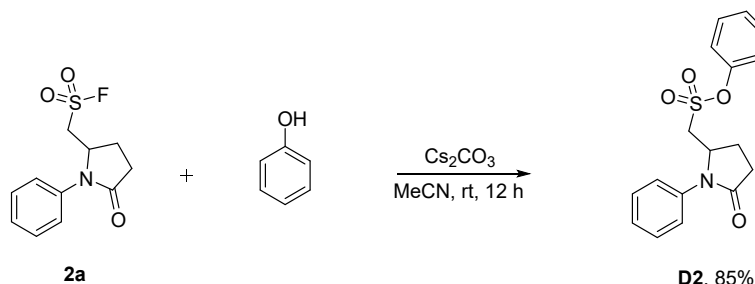

To a 5 mL glass vial were added sulfonyl fluoride **2a** (25.7 mg, 0.10 mmol, 1.0 eq.), phenol (10.4 mg, 0.11 mmol, 1.1 eq.), Cs<sub>2</sub>CO<sub>3</sub> (65.2 mg, 0.20 mmol, 2.0 eq.), followed by the addition of dry MeCN (0.5 mL). The reaction mixture was stirred at room temperature for 12 h to achieve full conversion. The crude reaction mixture was concentrated in vacuo and purified by flash chromatography (petroleum ether/ethyl acetate 5:1 to 3:1), giving the desired product as a white solid **D2** (28.3 mg, 85% yield).<sup>[6]</sup>

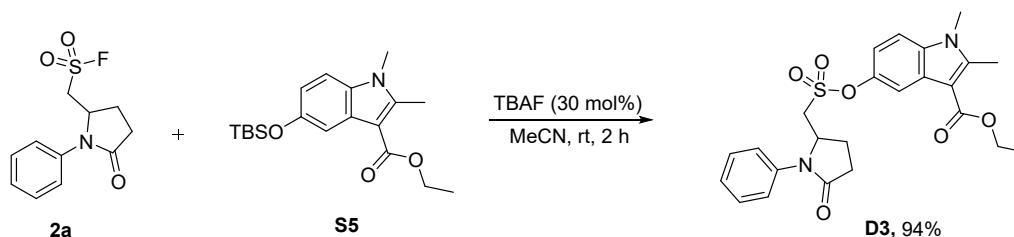

To a solution of sulfonyl fluoride **2a** (25.7 mg, 0.1 mmol, 1.0 eq.), TBS-protected mecarbate (34.8 mg, 0.11 mmol, 1.1 eq.) in MeCN (1 mL) was added tetrabutylammonium fluoride (TBAF) (30 μL, 0.03 mmol, 1 mol in THF) at room temperature. The mixture was stirred at room temperature until the completion of the reaction (2 h) as indicated by TLC. After the solvent was evaporated under vacuum, the residue was purified by flash column chromatography over silica gel (petroleum ether/ethyl acetate 3:1 to 1:1) to afford the product as a white solid **D3** (44 mg, 94%).<sup>[7]</sup>

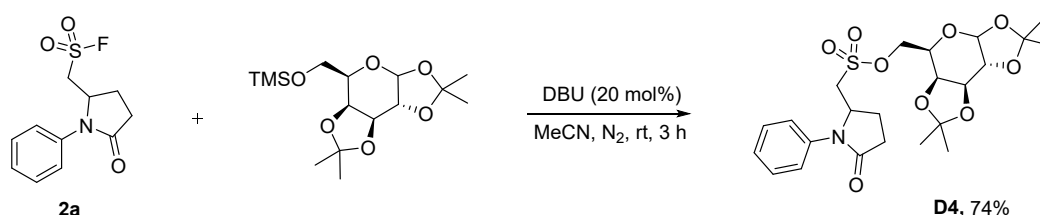

In a 10 mL flask, sulfonyl fluoride **2a** (42.5 mg, 0.165 mmol, 1.1 eq.) and TMS-protected alcohol<sup>[8]</sup> (49.9 mg, 0.15 mmol, 1.0 eq.) were dissolved in anhydrous MeCN (0.5 mL). DBU (4.6 mg, 4.5 μL, 0.03 mmol, 0.2 eq.) was added under a positive nitrogen flow. The flask was sealed and stirred at room temperature for 2 h. The solvent was removed immediately, and the crude reaction mixture was concentrated in vacuo and purified by flash chromatography (petroleum ether/ethyl acetate 3:1 to 2:1) to afford the pure triazole product as white solids **D4** (55 mg, 74% yield).

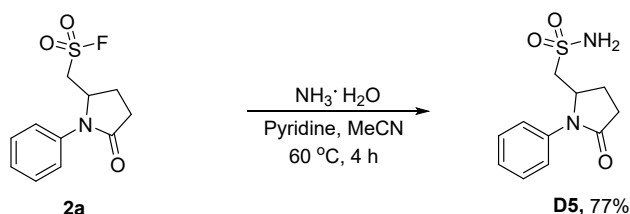

To an oven-dried sealed tube equipped with a magnetic stir bar were added sulfonyl fluoride **2a** (51.5 mg, 0.2 mmol, 1.0 eq.), pyridine (31.7 mg, 0.4 mmol, 2.0 eq.), ammonium hydroxide (143 μL, 2.0 mmol, 10 eq.) and MeCN (2 mL) under N<sub>2</sub> atmosphere. The mixture



was stirred at 60 °C for 4 h. After removal of the solvent under reduced pressure with a rotary evaporator, the crude product was purified by column chromatography on silica gel (petroleum ether/ethyl acetate 1:1 to 0:1) to give a colorless oil **D5** (39.2 mg, 77% yield).<sup>[5]</sup>

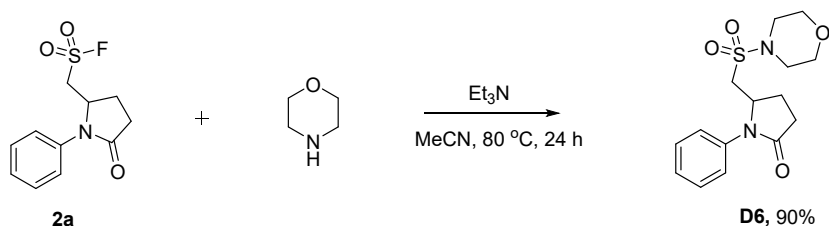

Sulfonyl fluoride **2a** (25.7 mg, 0.10 mmol, 1.0 eq.) was added to a solution of morpholine (17.4 mg, 0.20 mmol, 2.0 eq.) and triethylamine (28  $\mu\text{L}$ , 0.2 mmol, 2.0 eq.) in MeCN (0.1 mL). The reaction mixture was stirred at 80 °C for 24 h to achieve full conversion. The crude reaction mixture was concentrated in vacuo and purified by flash chromatography (petroleum ether/ethyl acetate 5:1 to 3:1) to give the product as a white solid **D6** (29.1 mg, 90% yield).<sup>[6]</sup>

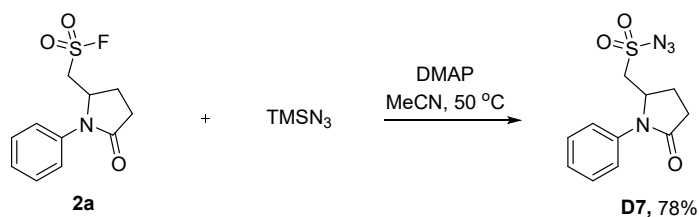

To a solution of sulfonyl fluoride **2a** (51.5 mg, 0.2 mmol, 1.0 eq.) in MeCN (0.4 mL) at 50 °C was added DMAP (36.7 mg, 0.3 mmol, 1.5 eq.) followed by  $\text{TMSN}_3$  (20  $\mu\text{L}$ , 0.15 mmol). The solution was stirred at 50 °C for 15 minutes, then further two portions of  $\text{TMSN}_3$  (20  $\mu\text{L}$ , 0.15 mmol) were added at intervals of 15 minutes. The solution was stirred for 6 h to achieve full conversion. The crude reaction mixture was concentrated in vacuo and purified by flash chromatography (petroleum ether/ethyl acetate 5:1 to 3:1) to give the product as a white solid **D7** (43 mg, 78% yield).<sup>[6]</sup>

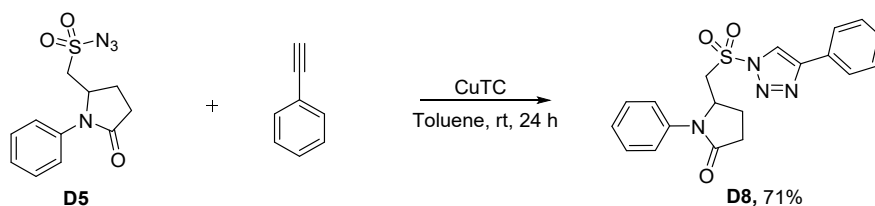

To a dry toluene (0.4 mL) suspension of CuTC (1.9 mg, 0.01 mmol), was added alkyne (11  $\mu\text{L}$ , 0.10 mmol, 1.0 eq.) with vigorous stirring. After 10 minutes, a toluene (0.1 mL) solution of sulfonyl azide **D7** (30.9 mg, 0.11 mmol, 1.1 eq.) was added dropwise over 15 minutes. The reaction was stirred at room temperature until complete consumption of the alkyne by TLC (24 h). The crude reaction mixture was concentrate in vacuo and purified by flash chromatography (petroleum ether/ethyl acetate 5:1) to afford the pure triazole product as white solids **D8** (27 mg, 71% yield).<sup>[6]</sup>

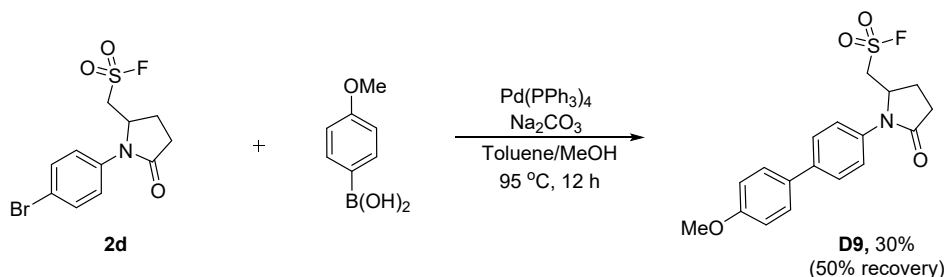

To a 10 mL Schlenk flask purged with  $\text{N}_2$  gas was added sulfonyl fluoride **2d** (33.6 mg, 0.1 mmol, 1.0 eq.),  $\text{Pd}(\text{PPh}_3)_4$  (5.8 mg, 0.005 mmol, 5 mol%), sodium carbonate (21.2 mg, 0.2 mmol, 2.0 eq.) and phenylboronic acid (22.8 mg, 0.15 mmol, 1.5 eq.). Then degassed anhydrous toluene (0.4 mL) and methanol (0.1 mL) was added by syringe. The reaction mixture was stirred at 95 °C for 12 h. After cooling to room temperature, the solvent was removed under vacuum, and the residue was purified by column chromatography on silica gel (petroleum ether/ethyl acetate 5:1) to afford the product as a white solid **D9** (10.9 mg, 30% yield) and the recovery **2d** (16.8 mg, 40%).<sup>[9]</sup>

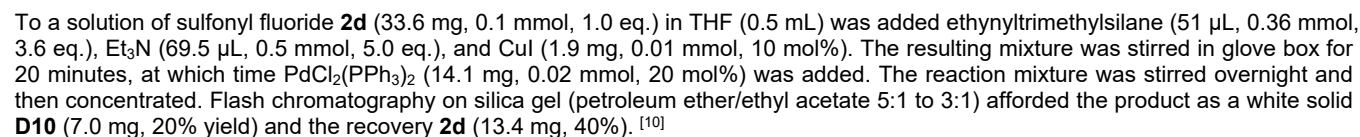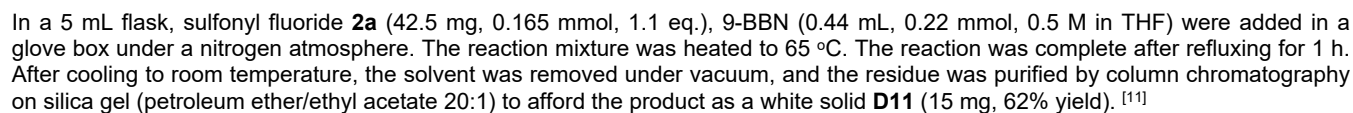

## 7. Mechanistic Experiments

### (1) Radical trapping experiments with TEMPO

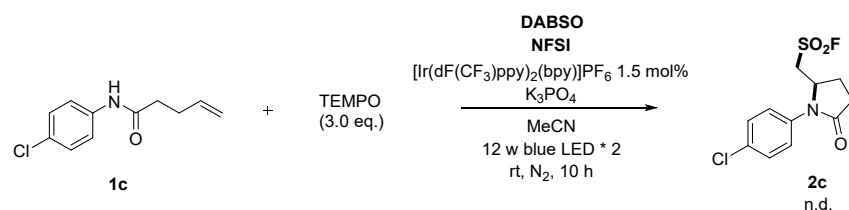

Under  $\text{N}_2$  atmosphere, a 10 mL reaction tube was charged with amide **1c** (0.1 mmol, 1.0 eq.), DABSO (36.1 mg, 0.15 mmol, 1.5 eq.), NFSI (63.1 mg, 0.2 mmol, 2.0 eq.),  $[\text{Ir}(\text{dF}(\text{CF}_3)\text{ppy})_2(\text{bpy})]\text{PF}_6$  (1.5 mg, 1.5 mol%),  $\text{K}_3\text{PO}_4$  (21.3 mg, 0.1 mmol, 1.0 eq.), TEMPO (94 mg, 0.6 mmol, 3 eq.) and MeCN (4.0 mL), and the reaction was carried out under the illumination of two 12 W blue lamps and the heat from light was blown away by fan. After stirring at room temperature for 10 h, TLC and LC-MS analysis demonstrated the sulfonyl fluoride **2c** is not founded, and the amidyl radical or  $\gamma$ -lactam bearing alkyl radical combined with TEMPO were detected by LC-MS.

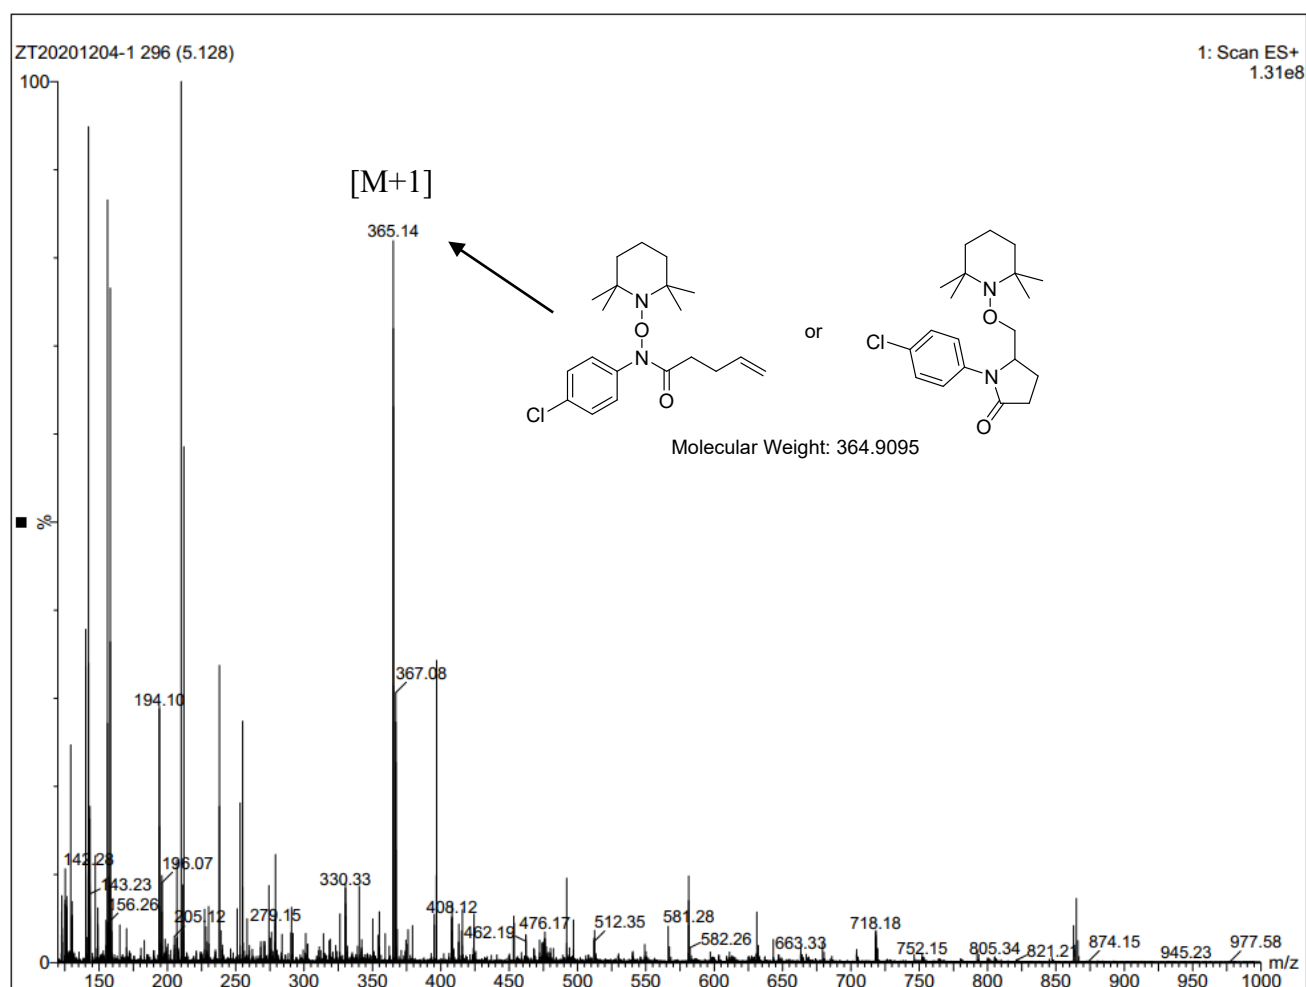

## (2) Radical trapping experiments with 1,1-diphenylethylene

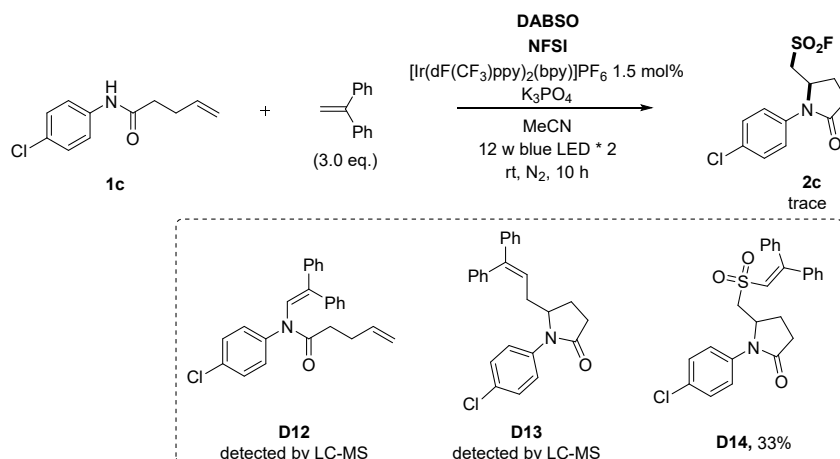

Under  $\text{N}_2$  atmosphere, a 10 mL reaction tube was charged with amide **1c** (0.1 mmol, 1.0 eq.), DABSO (36.1 mg, 0.15 mmol, 1.5 eq.), NFSI (63.1 mg, 0.2 mmol, 2.0 eq.),  $[\text{Ir}(\text{dF}(\text{CF}_3)\text{ppy})_2(\text{bpy})]\text{PF}_6$  (1.5 mg, 1.5 mol%),  $\text{K}_3\text{PO}_4$  (21.3 mg, 0.1 mmol, 1.0 eq.), 1,1-diphenylethylene (108 mg, 0.6 mmol, 3 eq.) and MeCN (4.0 mL), and the reaction was carried out under the illumination of two 12 W blue lamps and the heat from light was blown away by fan. After stirring at room temperature for 10 h, TLC analysis demonstrated only a small amount of sulfonyl fluoride **2c** was formed, and the **D12** or **D13** were determined by LC-MS. **D14** was isolated in 33% yield.

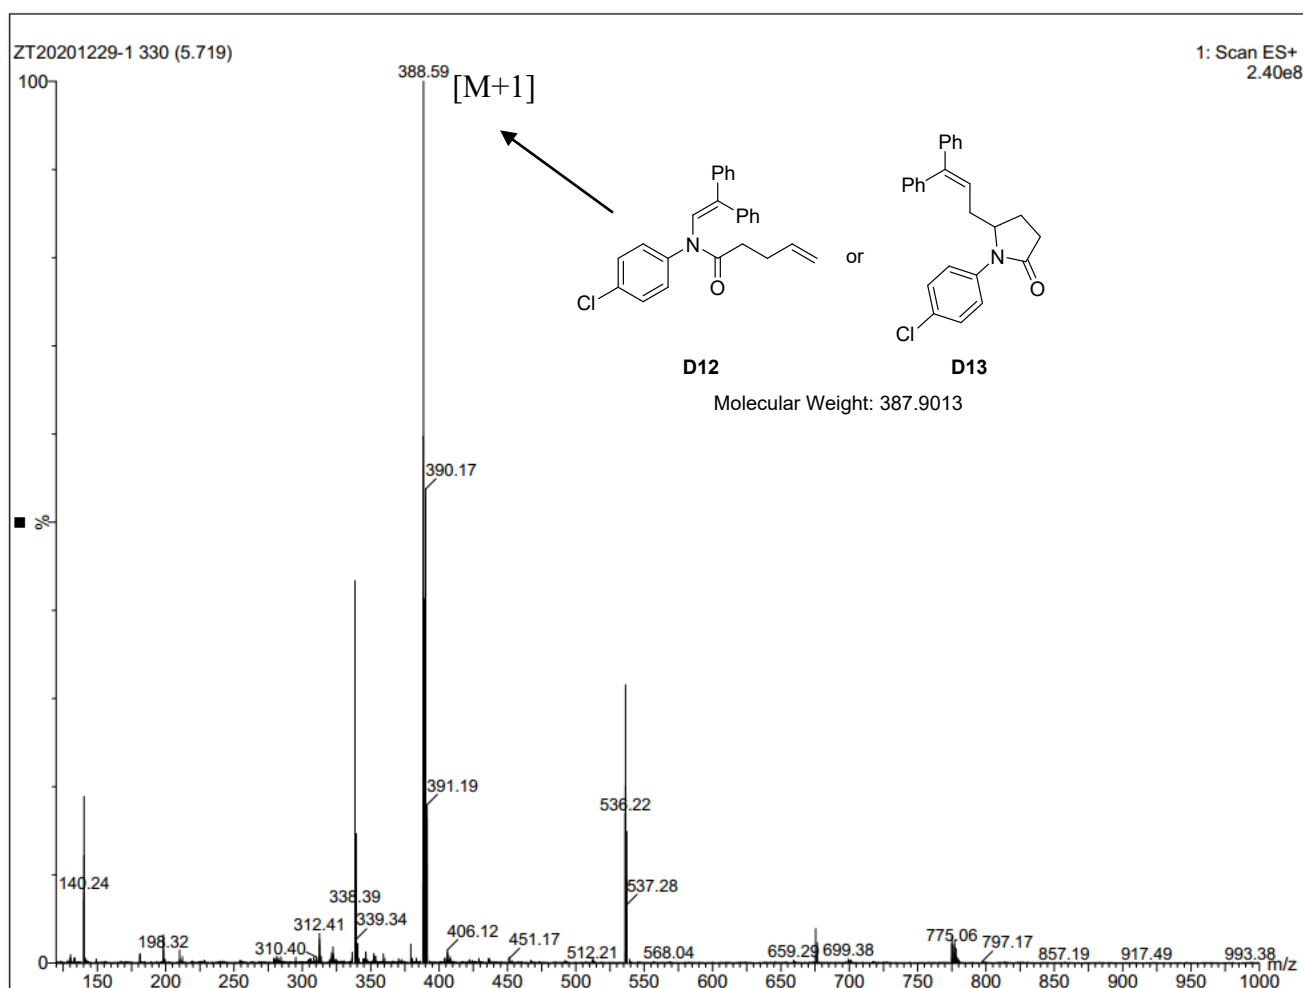

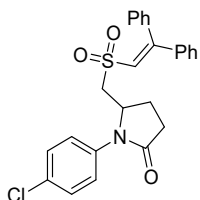

### 1-(4-chlorophenyl)-5-(((2,2-diphenylvinyl)sulfonyl)methyl)pyrrolidin-2-one (D14)

Compound **D14** was prepared according to **General Procedure** with additional 1,1-diphenylethylene (108 mg, 0.6 mmol, 3 eq.). The residue was purified by flash column chromatography on silica (petroleum ether/ethyl acetate 3:1) to give a white solid (14.9 mg, 33% yield).

$^1\text{H}$  NMR (400 MHz,  $\text{CDCl}_3$ )  $\delta$  7.46 – 7.37 (m, 2H), 7.38 – 7.28 (m, 8H), 7.22 (dd,  $J$  = 11.0, 4.0 Hz, 4H), 6.78 (s, 1H), 4.69 (ddd,  $J$  = 13.0, 6.2, 3.8 Hz, 1H), 2.96 (dd,  $J$  = 13.4, 1.7 Hz, 1H), 2.77 (dd,  $J$  = 13.4, 10.3 Hz, 1H), 2.57 – 2.43 (m, 3H), 2.19 (dt,  $J$  = 10.6, 9.0 Hz, 1H).  $^{13}\text{C}$  NMR (101 MHz,  $\text{CDCl}_3$ )  $\delta$  173.8, 157.0, 138.7, 135.2, 135.1, 131.4, 131.0, 129.8, 129.8, 129.6, 128.9, 128.4, 128.3, 126.9, 124.0, 56.0, 53.8, 30.6, 24.6. **HRMS (ESI)**:  $m/z$  calculated for  $[\text{M}]$  ( $\text{C}_{25}\text{H}_{22}\text{NO}_3\text{SCl}$ ) from  $[\text{M}+\text{H}]^+$  is 452.1082, found 452.108

### (3) Determination of the existence of nitrogen anion

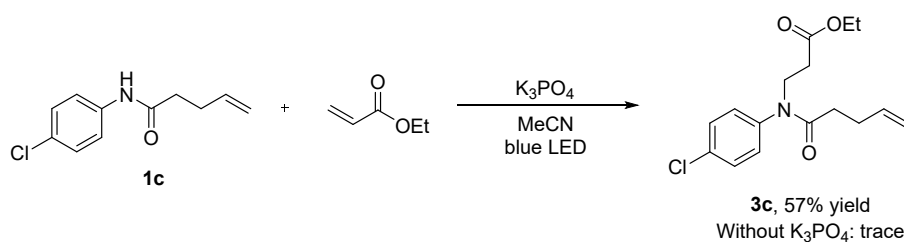

Under  $\text{N}_2$  atmosphere, a 10 mL reaction tube was charged with amide **1c** (0.1 mmol, 1.0 eq.), ethyl acrylate (0.15 mmol, 1.5 eq.), with or without  $\text{K}_3\text{PO}_4$  (21.3 mg, 0.1 mmol, 1.0 eq.), MeCN (4.0 mL), and the reaction was carried out under the illumination of two 12 W blue lamps and the heat from light was blown away by fan. After stirring at room temperature for 10 h, TLC analysis demonstrated that with the help of  $\text{K}_3\text{PO}_4$ , an aza-Michael product was formed, and only trace amount was formed without  $\text{K}_3\text{PO}_4$ .<sup>[12]</sup> The aza-Michael product and amide **1c** couldn't be separated for their similar polarity, but it can be demonstrated in  $^1\text{H}$ -NMR analysis as the following figure.

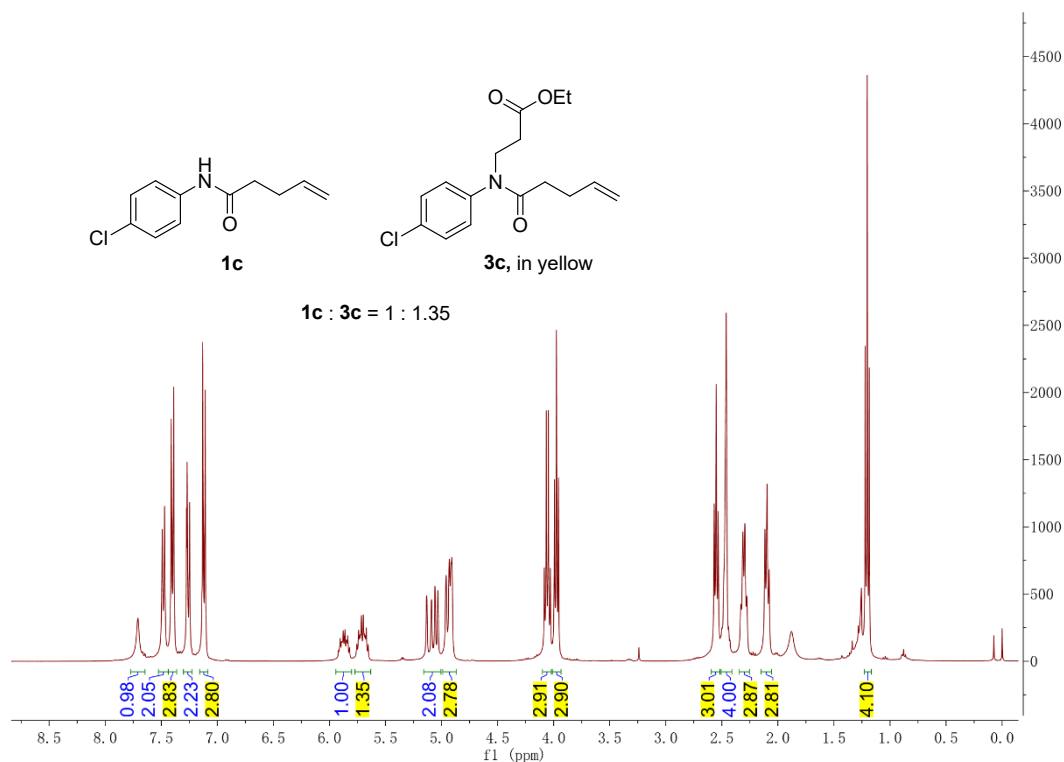

## 8. Stern-Volmer studies

Stern-Volmer studies were carried out with Fluoromax-4 (HORIBA Instruments Incorporated). Different solutions containing 0.2 mM **PC-II** and x mM substrates were irradiated at 370 nm and luminescence was measured at 473 nm.

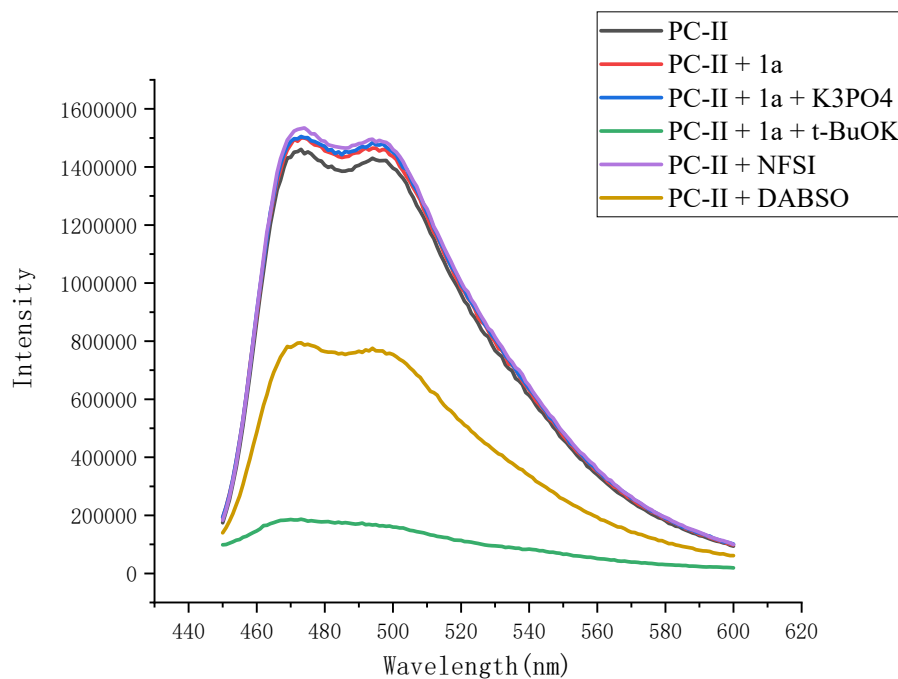

**Figure S1** Fluorescence quenching of the excited **PC-II** with each sample in MeCN

Samples were excited at 370 nm. **PC-II** (0.2 mM) in MeCN (black line), **PC-II** (0.2 mM) with **1a** (2.0 mM) in MeCN (red line), **PC-II** (0.2 mM) with **1a** and  $K_3PO_4$  (2.0 mM) in MeCN (blue line), **PC-II** (0.2 mM) with **1a** and *t*-BuOK (2.0 mM) in MeCN (green line), **PC-II** (0.2 mM) with **NFSI** (2.0 mM) in MeCN (purple line), **PC-II** (0.2 mM) with **DABSO** (2.0 mM) in MeCN (brown line).

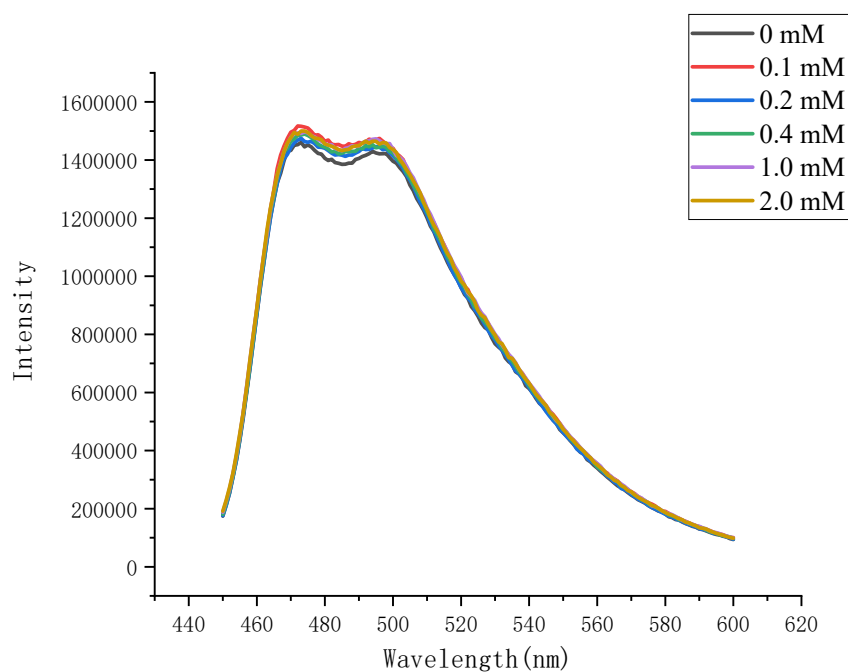

**Figure S2** Fluorescence quenching of the excited **PC-II** with different concentrations of **1a**

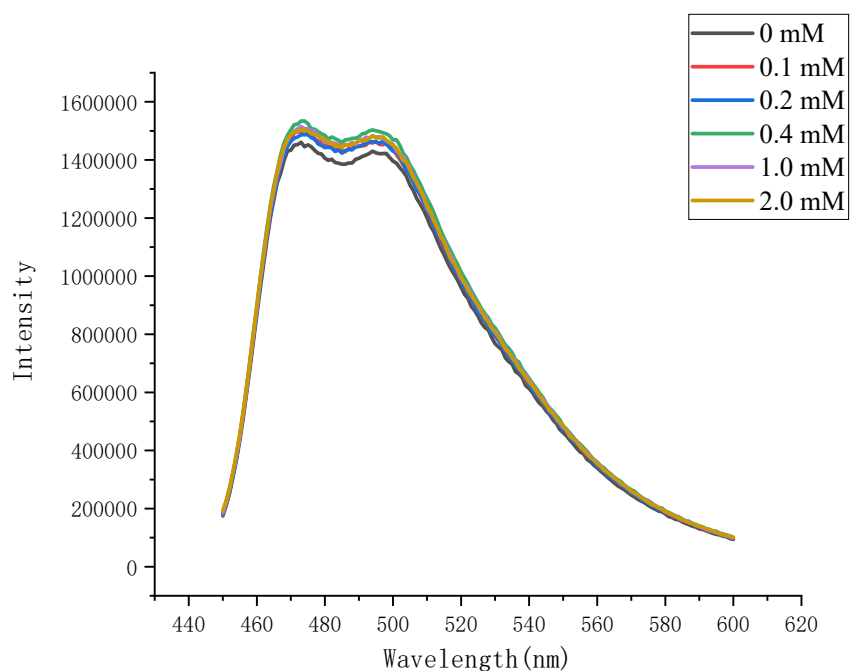

**Figure S3** Fluorescence quenching of the excited **PC-II** with different concentrations of **1a** and 1.0 eq.  $\text{K}_3\text{PO}_4$

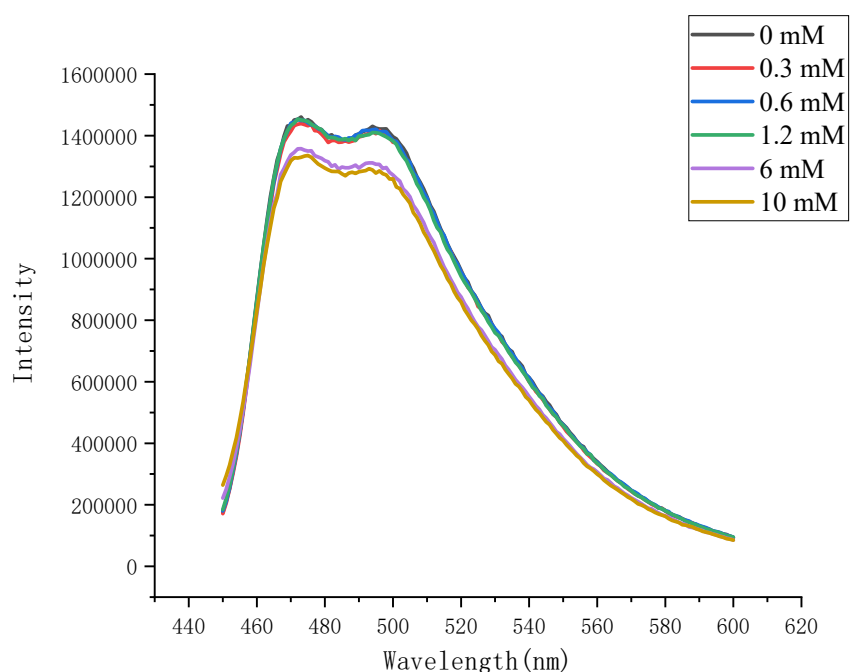

**Figure S4** Fluorescence quenching of the excited **PC-II** with different concentrations of **1a** and 2.0 eq.  $\text{K}_3\text{PO}_4$

Given that different concentrations of **1a** and 1.0 eq.  $\text{K}_3\text{PO}_4$  can't quench the excited **PC-II** photocatalyst, we try to increase the concentration of **1a** and double the amount of  $\text{K}_3\text{PO}_4$ . As shown in **Figure S4**, when the concentration of **1a** and  $\text{K}_3\text{PO}_4$  was increased to 6 mM and 10 mM, a slight quenching was obtained. Therefore, based on the previous works,<sup>[12]</sup> we replaced  $\text{K}_3\text{PO}_4$  with *t*-BuOK to increase the basicity so that favorably form potassium salt of **1a**. As shown in **Figure S5**, obvious quenching was obtained. The result shows that the **PC-II** photocatalyst can be quenched by the potassium salt of **1a**.

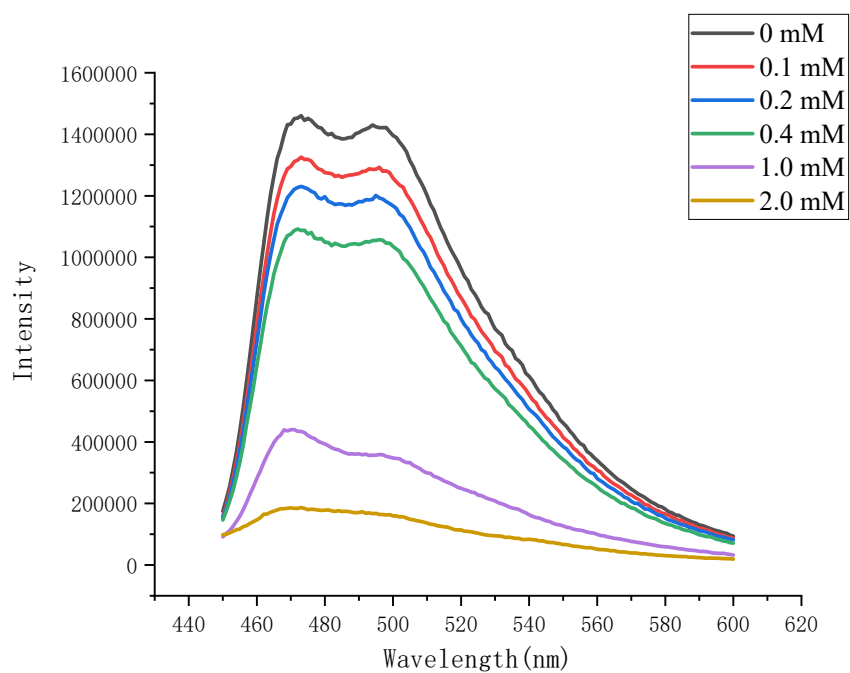

**Figure S5** Fluorescence quenching of the excited **PC-II** with different concentrations of **1a** and 1.0 eq. *t*-BuOK

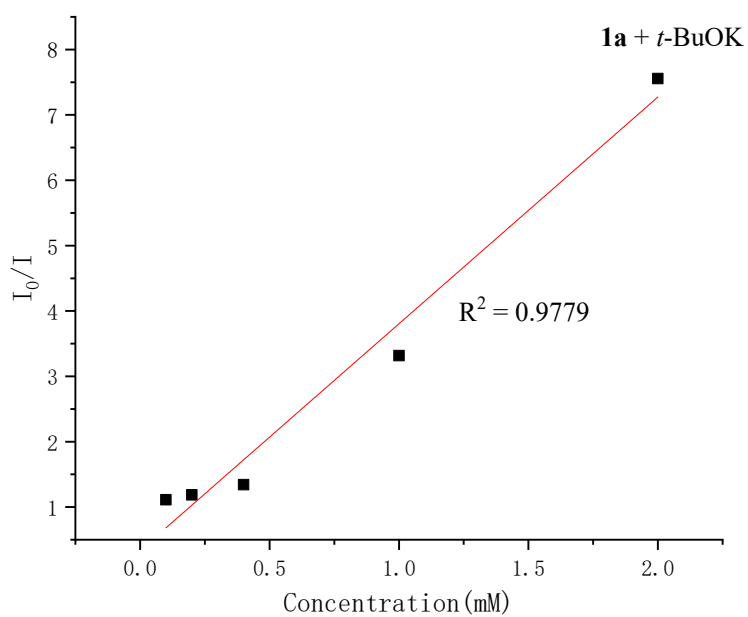

**Figure S6** Stern-Volmer emission quenching studies of the excited **PC-II** by **1a** and 1.0 eq. *t*-BuOK



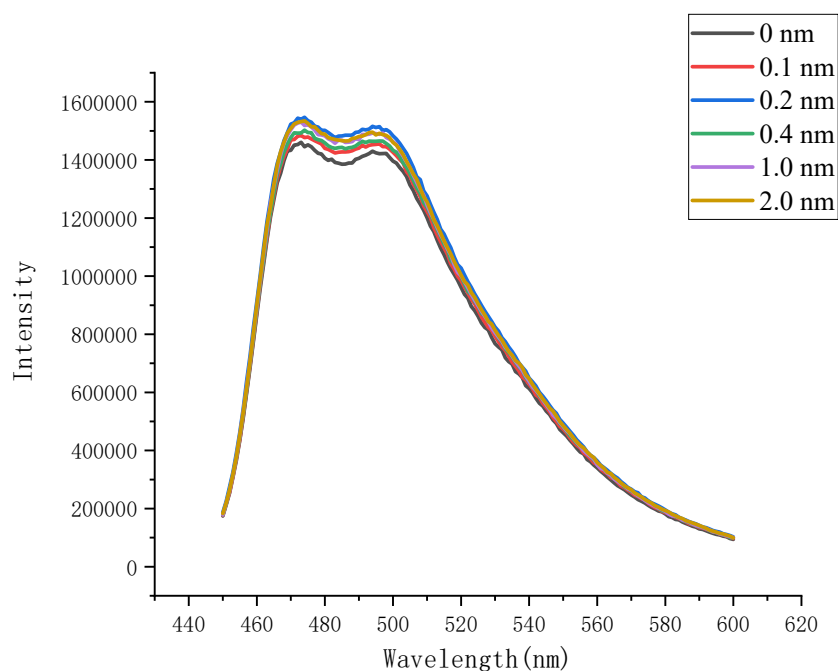

**Figure S7** Fluorescence quenching of the excited **PC-II** with different concentrations of NFSI

However, as shown in **Figure S8**, the results of fluorescence quenching of the excited **PC-II** with different concentrations of DABSO suggest that the excited **PC-II** can also be quenched by DABSO. We think that after the release of sulfur dioxide, DABSO was converted to DABCO, so that the tertiary amine compounds can quench the excited **PC-II** photocatalyst. Therefore, as shown in **Figure S10**, we investigated the fluorescence quenching of excited **PC-II** with different concentrations of DABCO.

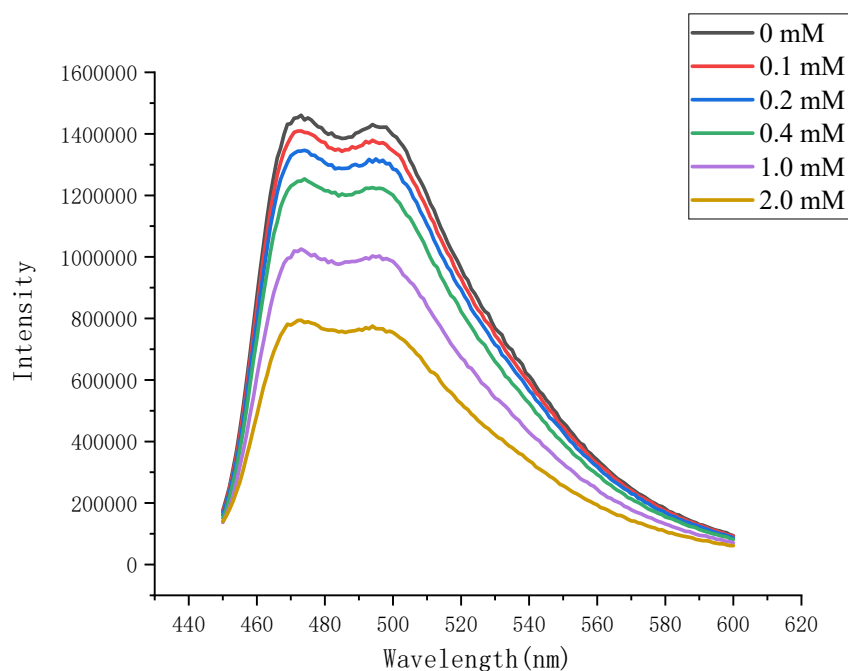

**Figure S8** Fluorescence quenching of the excited **PC-II** with different concentrations of DABSO

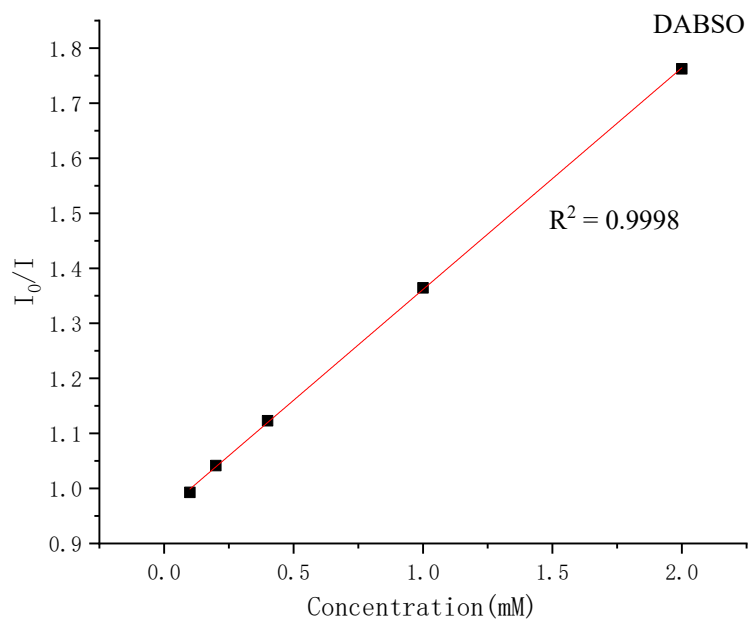

**Figure S9** Stern-Volmer emission quenching studies of the excited **PC-II** with DABSO

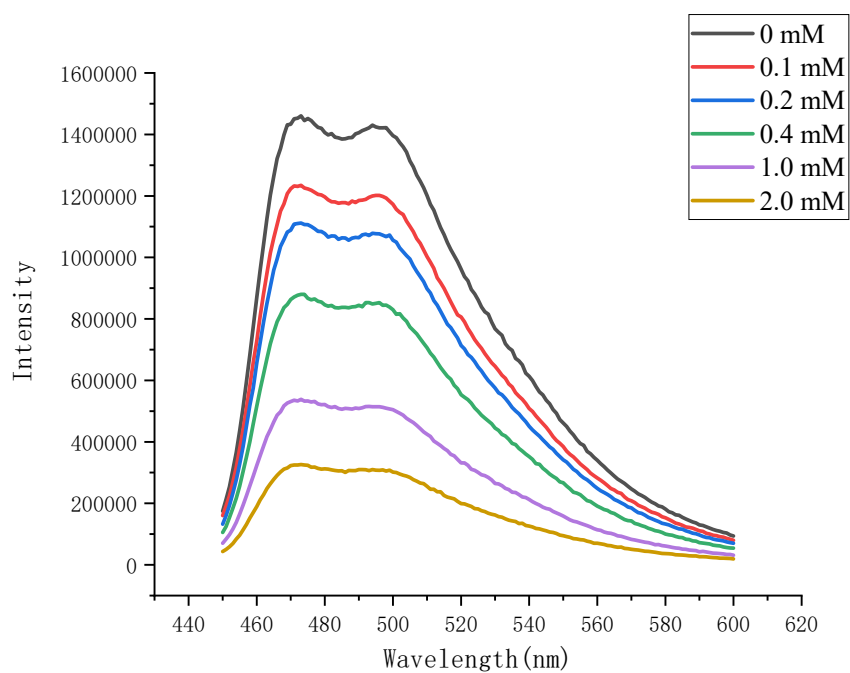

**Figure S10** Fluorescence quenching of the excited **PC-II** with different concentrations of DABCO

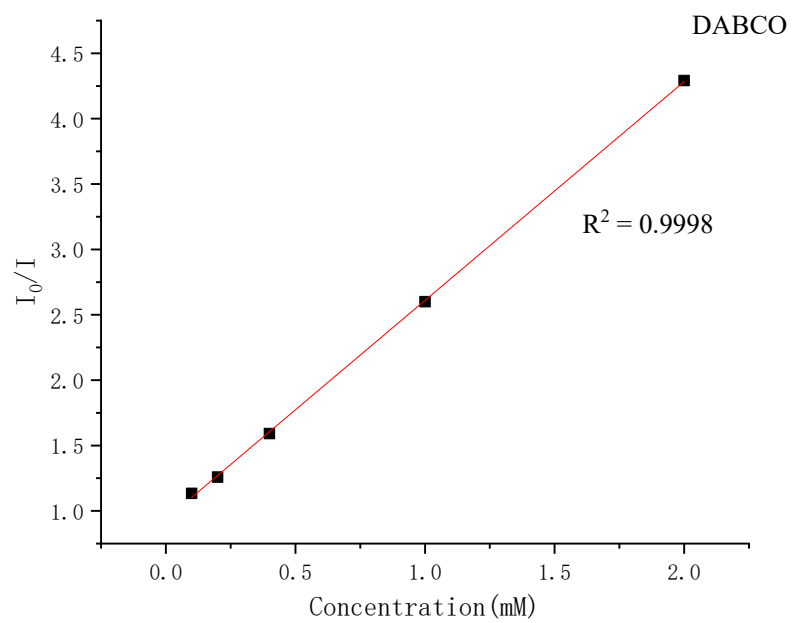

**Figure S11** Stern-Volmer emission quenching studies of **PC-II** by DABCO

## 9. Large-scale Experiment

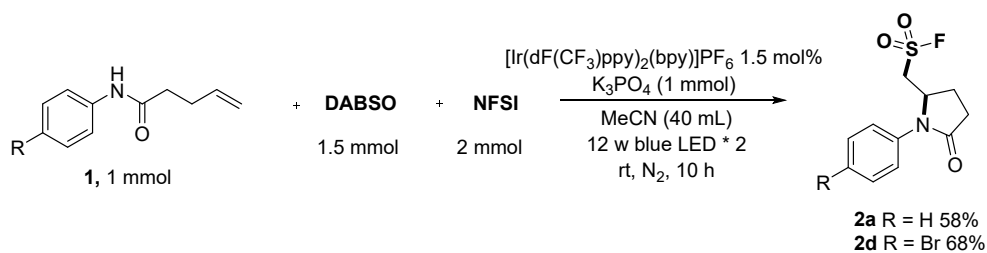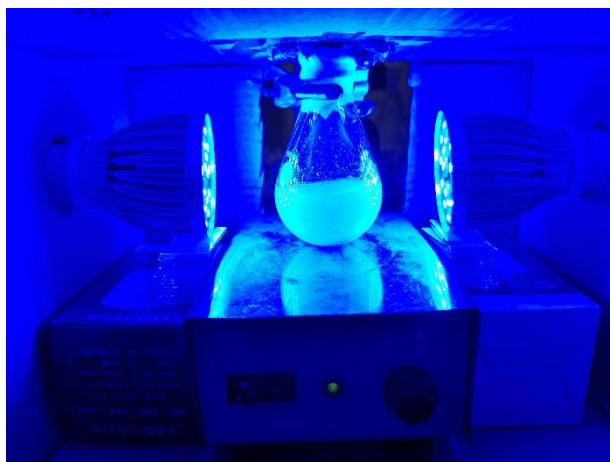

To a 100 mL round-bottom flask equipped with a magnetic stirring bar, amide **1** (1 mmol, 1.0 eq.), DABSO (361 mg, 1.5 mmol, 1.5 eq.), NFSI (631 mg, 2 mmol, 2.0 eq.),  $[\text{Ir}(\text{dF}(\text{CF}_3)\text{ppy})_2(\text{bpy})]\text{PF}_6$  (15 mg, 1.5 mol%),  $\text{K}_3\text{PO}_4$  (213 mg, 1 mmol, 1.0 eq.), and MeCN (4.0 mL), were added successively under  $\text{N}_2$  atmosphere. The reaction was carried out under the illumination of two 12 W blue lamps and the heat from light was blown away by fan. After stirring at room temperature for 10 h, the reaction mixture was filtered through a pad of celite, eluted with ethyl acetate, concentrated, and purified by flash column chromatography (eluent: petroleum ether/ ethyl acetate 5:1 to 3:1) on silica gel to give the desired product **2**.

## 10. Characterization of Compounds 1d, 1e, 1l-1r, 1t-1ad, 1af-1ao, 2a-2ao, D1-D14, S5

Characterization of compounds **1a**, **1b**, **1c**, **1f**, **1g**, **1h**, **1i**, **1j**, **1k**, **1s** have been reported in the literature.<sup>[13]</sup> Characterization of compounds **1ae** have been reported in the literature.<sup>[14]</sup>

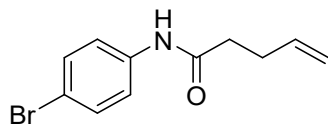

### N-(4-bromophenyl)pent-4-enamide (**1d**)

Compound **1d** was prepared according to **Method A**.

<sup>1</sup>H NMR (400 MHz, CDCl<sub>3</sub>) δ 7.55 (s, 1H), 7.39 (s, 4H), 5.85 (ddd, *J* = 10.3, 7.8, 4.1 Hz, 1H), 5.20 – 4.97 (m, 2H), 2.45 (d, *J* = 8.2 Hz, 4H). <sup>13</sup>C NMR (101 MHz, CDCl<sub>3</sub>) δ 170.9, 137.0, 136.7, 132.0, 121.6, 116.9, 116.1, 36.8, 29.4. **HRMS (ESI)**: *m/z* calculated for [M] (C<sub>11</sub>H<sub>12</sub>NOBr) from [M-H]<sup>+</sup> is 252.0029, found 252.0022.

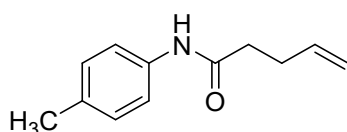

### N-(p-tolyl)pent-4-enamide (**1e**)

Compound **1e** was prepared according to **Method A**.

<sup>1</sup>H NMR (400 MHz, CDCl<sub>3</sub>) δ 7.58 (s, 1H), 7.38 (d, *J* = 8.3 Hz, 2H), 7.09 (d, *J* = 8.2 Hz, 2H), 5.86 (dq, *J* = 10.5, 6.1 Hz, 1H), 5.07 (dd, *J* = 26.4, 13.5 Hz, 2H), 2.53 – 2.37 (m, 4H), 2.30 (s, 3H). <sup>13</sup>C NMR (101 MHz, CDCl<sub>3</sub>) δ 170.7, 137.0, 135.4, 133.9, 129.5, 120.2, 115.8, 36.7, 29.6, 20.9. **HRMS (ESI)**: *m/z* calculated for [M] (C<sub>12</sub>H<sub>15</sub>NO) from [M+Na]<sup>+</sup> is 212.1046, found 212.1031.

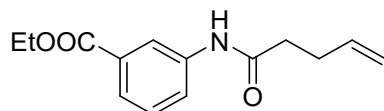

### ethyl 3-(pent-4-enamido)benzoate (**1l**)

Compound **1l** was prepared according to the **Method A**.

<sup>1</sup>H NMR (400 MHz, CDCl<sub>3</sub>) δ 8.01 (s, 1H), 7.93 (d, *J* = 8.1 Hz, 1H), 7.83 (s, 1H), 7.76 (d, *J* = 7.8 Hz, 1H), 7.36 (t, *J* = 7.9 Hz, 1H), 6.12 – 5.63 (m, 1H), 5.31 – 4.79 (m, 2H), 4.35 (q, *J* = 7.1 Hz, 2H), 2.47 (d, *J* = 2.7 Hz, 4H), 1.36 (t, *J* = 7.1 Hz, 3H). <sup>13</sup>C NMR (101 MHz, CDCl<sub>3</sub>) δ 171.1, 166.4, 138.2, 136.8, 131.2, 129.2, 125.3, 124.5, 120.7, 116.0, 61.3, 36.7, 29.4, 14.3. **HRMS (ESI)**: *m/z* calculated for [M] (C<sub>14</sub>H<sub>17</sub>NO<sub>3</sub>) from [M+Na]<sup>+</sup> is 270.1101, found 270.1090.

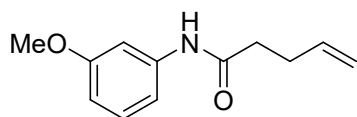

### N-(3-methoxyphenyl)pent-4-enamide (**1m**)

Compound **1m** was prepared according to **Method A**.

<sup>1</sup>H NMR (400 MHz, CDCl<sub>3</sub>) δ 7.77 (s, 1H), 7.30 (s, 1H), 7.17 (t, *J* = 8.1 Hz, 1H), 6.98 (d, *J* = 7.9 Hz, 1H), 6.70 – 6.59 (m, 1H), 5.84 (ddd, *J* = 15.9, 8.6, 4.9 Hz, 1H), 5.05 (dd, *J* = 25.6, 13.7 Hz, 2H), 3.75 (s, 3H), 2.44 (s, 4H). <sup>13</sup>C NMR (101 MHz, CDCl<sub>3</sub>) δ 171.0, 160.1, 139.2, 136.9, 129.6, 115.9, 112.1, 110.1, 105.7, 55.3, 36.8, 29.5. **HRMS (ESI)**: *m/z* calculated for [M] (C<sub>12</sub>H<sub>15</sub>NO<sub>2</sub>) from [M+Na]<sup>+</sup> is 228.0995, found 228.0980.

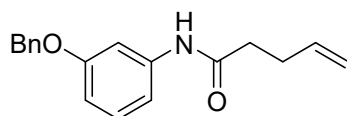

### N-(3-(benzyloxy)phenyl)pent-4-enamide (**1n**)

Compound **1n** was prepared according to **Method A**.

<sup>1</sup>H NMR (400 MHz, CDCl<sub>3</sub>) δ 7.37 (ddd, *J* = 23.2, 13.1, 7.0 Hz, 7H), 7.19 (t, *J* = 8.1 Hz, 1H), 6.98 (d, *J* = 7.7 Hz, 1H), 6.73 (d, *J* = 7.7 Hz, 1H), 5.87 (ddd, *J* = 16.5, 10.4, 6.0 Hz, 1H), 5.28 – 4.86 (m, 4H), 2.46 (dd, *J* = 10.5, 5.1 Hz, 4H). <sup>13</sup>C NMR (101 MHz, CDCl<sub>3</sub>) δ 170.7, 159.4, 139.2, 136.9 (d, *J* = 3.3 Hz), 129.8, 128.6, 128.0, 127.6, 116.0, 112.3, 111.1, 106.5, 70.0, 36.9, 29.5. **HRMS (ESI)**: *m/z* calculated for [M] (C<sub>18</sub>H<sub>19</sub>NO<sub>2</sub>) from [M+Na]<sup>+</sup> is 304.1308, found 304.1295.

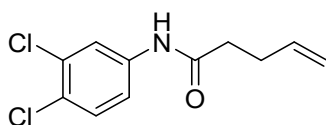

#### N-(3,4-dichlorophenyl)pent-4-enamide (1o)

Compound **1o** was prepared according to **Method A**.

$^1\text{H}$  NMR (400 MHz,  $\text{CDCl}_3$ )  $\delta$  7.74 (d,  $J$  = 1.9 Hz, 1H), 7.53 (s, 1H), 7.38 – 7.27 (m, 2H), 5.97 – 5.77 (m, 1H), 5.25 – 4.99 (m, 2H), 2.46 (d,  $J$  = 2.7 Hz, 4H).  $^{13}\text{C}$  NMR (101 MHz,  $\text{CDCl}_3$ )  $\delta$  170.9, 137.3, 136.6, 132.8, 130.5, 127.5, 121.7, 119.2, 116.3, 36.7, 29.3.

**HRMS (ESI)**:  $m/z$  calculated for  $[\text{M}]$  ( $\text{C}_{11}\text{H}_{11}\text{Cl}_2\text{NO}$ ) from  $[\text{M}+\text{Na}]^+$  is 266.0110, found 266.0093.

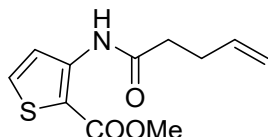

#### methyl 3-(pent-4-enamido)thiophene-2-carboxylate (1p)

Compound **1p** was prepared according to **Method A**.

$^1\text{H}$  NMR (400 MHz,  $\text{CDCl}_3$ )  $\delta$  10.17 (s, 1H), 8.12 (d,  $J$  = 5.4 Hz, 1H), 7.45 (d,  $J$  = 5.4 Hz, 1H), 6.17 – 5.70 (m, 1H), 5.06 (dd,  $J$  = 30.3, 13.7 Hz, 2H), 3.88 (s, 3H), 2.99 – 2.29 (m, 4H).  $^{13}\text{C}$  NMR (101 MHz,  $\text{CDCl}_3$ )  $\delta$  170.0, 164.9, 144.9, 136.5, 131.8, 122.4, 115.9, 109.9, 52.0, 36.8, 29.2. **HRMS (ESI)**:  $m/z$  calculated for  $[\text{M}]$  ( $\text{C}_{11}\text{H}_{13}\text{NO}_3\text{S}$ ) from  $[\text{M}+\text{Na}]^+$  is 262.0508, found 262.0505.

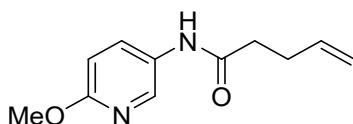

#### N-(6-methoxypyridin-3-yl)pent-4-enamide (1q)

Compound **1q** was prepared according to **Method A**.

$^1\text{H}$  NMR (400 MHz,  $\text{CDCl}_3$ )  $\delta$  8.12 (d,  $J$  = 2.6 Hz, 1H), 7.83 (dd,  $J$  = 8.9, 2.7 Hz, 2H), 6.67 (d,  $J$  = 8.9 Hz, 1H), 6.18 – 5.57 (m, 1H), 5.04 (ddd,  $J$  = 13.7, 11.6, 1.5 Hz, 2H), 3.87 (s, 3H), 2.43 (d,  $J$  = 2.5 Hz, 4H).  $^{13}\text{C}$  NMR (101 MHz,  $\text{CDCl}_3$ )  $\delta$  171.2, 161.0, 138.8, 136.7, 132.6, 128.6, 115.9, 110.4, 53.5, 36.2, 29.4. **HRMS (ESI)**:  $m/z$  calculated for  $[\text{M}]$  ( $\text{C}_{11}\text{H}_{14}\text{N}_2\text{O}_2$ ) from  $[\text{M}+\text{H}]^+$  is 207.1128, found 207.1112.

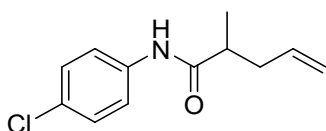

#### N-(4-chlorophenyl)-2-methylpent-4-enamide (1r)

Compound **1r** was prepared according to **Method A**.

$^1\text{H}$  NMR (400 MHz,  $\text{CDCl}_3$ )  $\delta$  7.65 – 7.36 (m, 3H), 7.25 (d,  $J$  = 9.0 Hz, 2H), 5.78 (ddd,  $J$  = 13.8, 10.1, 6.9 Hz, 1H), 5.25 – 4.93 (m, 2H), 2.44 (ddd,  $J$  = 14.0, 13.2, 6.9 Hz, 2H), 2.23 (dd,  $J$  = 13.5, 6.3 Hz, 1H), 1.23 (d,  $J$  = 6.7 Hz, 3H).  $^{13}\text{C}$  NMR (101 MHz,  $\text{CDCl}_3$ )  $\delta$  174.4, 136.5, 135.5, 129.3, 129.0, 121.4, 117.4, 42.2, 38.4, 17.5. **HRMS (ESI)**:  $m/z$  calculated for  $[\text{M}]$  ( $\text{C}_{12}\text{H}_{14}\text{ClNO}$ ) from  $[\text{M}+\text{H}]^+$  is 224.0837, found 224.0830.

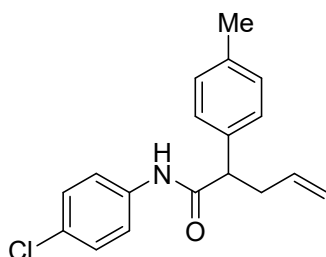

#### N-(4-chlorophenyl)-2-(p-tolyl)pent-4-enamide (1t)

Compound **1t** was prepared according to **Method A**, starting from **S2**.

$^1\text{H}$  NMR (400 MHz,  $\text{CDCl}_3$ )  $\delta$  7.37 (d,  $J$  = 8.8 Hz, 2H), 7.21 (ddd,  $J$  = 17.6, 10.7, 5.1 Hz, 7H), 5.74 (ddt,  $J$  = 17.1, 10.1, 6.9 Hz, 1H), 5.04 (ddd,  $J$  = 13.6, 11.2, 1.2 Hz, 2H), 3.54 (t,  $J$  = 7.6 Hz, 1H), 2.97 (dt,  $J$  = 14.2, 7.0 Hz, 1H), 2.57 (dt,  $J$  = 14.6, 7.4 Hz, 1H), 2.35 (s, 3H).  $^{13}\text{C}$  NMR (101 MHz,  $\text{CDCl}_3$ )  $\delta$  171.3, 137.5, 136.3, 135.7, 135.6, 129.8, 129.2, 128.9, 127.9, 121.0, 117.0, 53.6, 37.3, 21.1. **HRMS (ESI)**:  $m/z$  calculated for  $[\text{M}]$  ( $\text{C}_{18}\text{H}_{18}\text{ClNO}$ ) from  $[\text{M}+\text{Na}]^+$  is 322.0969, found 322.0985.

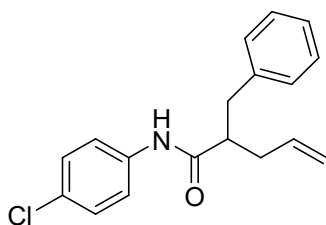

#### 2-benzyl-N-(4-chlorophenyl)pent-4-enamide (1u)

Compound **1u** was prepared according to **Method A**, starting from **S1**.

$^1\text{H}$  NMR (400 MHz,  $\text{CDCl}_3$ )  $\delta$  7.32 – 7.14 (m, 9H), 6.91 (s, 1H), 5.90 – 5.76 (m, 1H), 5.22 – 5.04 (m, 2H), 2.97 (dd,  $J$  = 13.5, 9.1 Hz, 1H), 2.86 (dd,  $J$  = 13.5, 5.0 Hz, 1H), 2.61 – 2.45 (m, 2H), 2.40 – 2.27 (m, 1H).  $^{13}\text{C}$  NMR (101 MHz,  $\text{CDCl}_3$ )  $\delta$  172.8, 139.5, 136.0, 135.4, 129.4, 129.0, 128.9, 128.7, 126.7, 121.5, 117.6, 50.9, 38.9, 36.8. **HRMS (ESI)**:  $m/z$  calculated for  $[\text{M}]$  ( $\text{C}_{18}\text{H}_{18}\text{ClNO}$ ) from  $[\text{M}+\text{Na}]^+$  is 322.0969, found 322.0985.

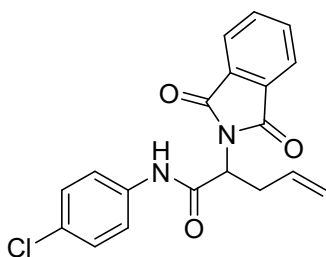

#### N-(4-chlorophenyl)-2-(1,3-dioxoisindolin-2-yl)pent-4-enamide (1v)

Compound **1v** was prepared according to **Method A**.

$^1\text{H}$  NMR (400 MHz,  $\text{CDCl}_3$ )  $\delta$  8.49 (s, 1H), 7.89 – 7.81 (m, 2H), 7.79 – 7.71 (m, 2H), 7.44 (d,  $J$  = 8.7 Hz, 2H), 7.23 (d,  $J$  = 8.8 Hz, 2H), 6.03 – 5.59 (m, 1H), 5.31 – 4.76 (m, 3H), 3.20 – 2.91 (m, 2H).  $^{13}\text{C}$  NMR (101 MHz,  $\text{CDCl}_3$ )  $\delta$  168.3, 166.7, 136.0, 134.5, 133.0, 131.4, 129.6, 128.9, 123.7, 121.3, 119.6, 55.3, 33.7. **HRMS (ESI)**:  $m/z$  calculated for  $[\text{M}]$  ( $\text{C}_{19}\text{H}_{15}\text{ClN}_2\text{O}_3$ ) from  $[\text{M}+\text{H}]^+$  is 355.0844, found 355.0853.

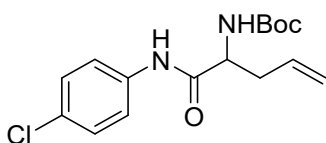

#### tert-butyl (1-((4-chlorophenyl)amino)-1-oxopent-4-en-2-yl)carbamate (1w)

Compound **1w** was prepared according to **Method A**.

$^1\text{H}$  NMR (400 MHz,  $\text{CDCl}_3$ )  $\delta$  8.91 (s, 1H), 7.37 (d,  $J$  = 8.1 Hz, 2H), 7.15 (d,  $J$  = 7.8 Hz, 2H), 5.80 (td,  $J$  = 16.9, 7.2 Hz, 1H), 5.35 (s, 1H), 5.16 (t,  $J$  = 12.9 Hz, 2H), 4.37 (s, 1H), 2.85 – 2.39 (m, 2H), 1.43 (s, 9H).  $^{13}\text{C}$  NMR (101 MHz,  $\text{CDCl}_3$ )  $\delta$  170.3, 156.4, 136.4, 132.9, 129.2, 128.9, 121.1, 119.3, 80.9, 54.7, 36.5, 28.4. **HRMS (ESI)**:  $m/z$  calculated for  $[\text{M}]$  ( $\text{C}_{16}\text{H}_{21}\text{ClN}_2\text{O}_3$ ) from  $[\text{M}+\text{Na}]^+$  is 347.1133, found 347.1145.

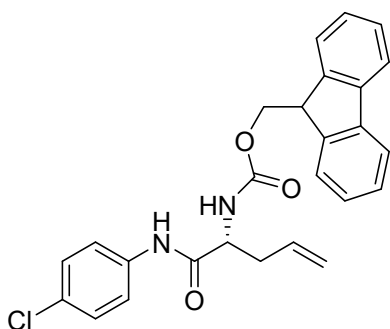

#### (9H-fluoren-9-yl)methyl (1-((4-chlorophenyl)amino)-1-oxopent-4-en-2-yl)carbamate (1x)

Compound **1x** was prepared according to **Method A**.

$^1\text{H}$  NMR (400 MHz,  $\text{DMSO}-d_6$ )  $\delta$  10.21 (s, 1H), 7.88 (d,  $J$  = 7.4 Hz, 2H), 7.73 (d,  $J$  = 7.5 Hz, 3H), 7.64 (d,  $J$  = 8.6 Hz, 2H), 7.47 – 7.28 (m, 6H), 5.90 – 5.72 (m, 1H), 5.10 (dd,  $J$  = 30.6, 13.6 Hz, 2H), 4.38 – 4.13 (m, 4H), 2.48 – 2.33 (m, 2H).  $^{13}\text{C}$  NMR (101 MHz,  $\text{DMSO}-d_6$ )  $\delta$  170.5, 156.0, 143.8, 143.7, 140.7, 137.7, 134.0, 128.6, 127.6, 127.0, 125.3, 120.8, 120.1, 117.7, 65.7, 55.0, 46.6, 36.0. **HRMS (ESI)**:  $m/z$  calculated for  $[\text{M}]$  ( $\text{C}_{26}\text{H}_{23}\text{ClN}_2\text{O}_3$ ) from  $[\text{M}+\text{Na}]^+$  is 469.1289, found 469.1320.

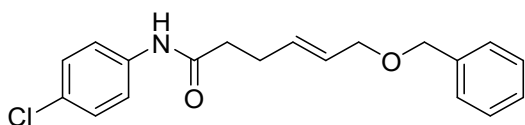

#### (E)-6-(benzyloxy)-N-(4-chlorophenyl)hex-4-enamide (1y)

Compound **1y** was prepared according to **Method C**.

$^1\text{H}$  NMR (400 MHz,  $\text{CDCl}_3$ )  $\delta$  7.69 (d,  $J$  = 25.3 Hz, 1H), 7.43 (dd,  $J$  = 14.1, 8.8 Hz, 2H), 7.37 – 7.19 (m, 7H), 5.87 – 5.51 (m, 2H), 4.50 (d,  $J$  = 6.9 Hz, 2H), 4.04 (dd,  $J$  = 50.0, 6.0 Hz, 2H), 2.53 – 2.35 (m, 4H).  $^{13}\text{C}$  NMR (101 MHz,  $\text{CDCl}_3$ )  $\delta$  170.7, 138.0, 136.5, 131.9, 129.2, 128.9, 128.5, 128.0, 127.9, 127.7, 121.3, 72.6, 65.7, 37.1, 23.5. **HRMS (ESI)**:  $m/z$  calculated for  $[\text{M}]$  ( $\text{C}_{19}\text{H}_{20}\text{ClNO}_2$ ) from  $[\text{M}+\text{Na}]^+$  is 352.1075, found 352.1093.

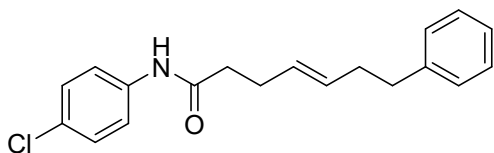

#### N-(4-chlorophenyl)cyclohex-3-ene-1-carboxamide (1z)

Compound **1z** was prepared according to **Method C**.

$^1\text{H}$  NMR (400 MHz,  $\text{CDCl}_3$ )  $\delta$  7.42 (t,  $J$  = 12.9 Hz, 2H), 7.33 – 7.13 (m, 8H), 5.68 – 5.30 (m, 2H), 2.82 – 2.59 (m, 2H), 2.50 – 2.08 (m, 6H).  $^{13}\text{C}$  NMR (101 MHz,  $\text{CDCl}_3$ )  $\delta$  170.9, 142.0, 136.5, 130.7, 129.0, 128.8, 128.5, 128.4, 128.3, 125.9, 121.1, 37.5, 35.8, 29.2, 23.3. **HRMS (ESI)**:  $m/z$  calculated for  $[\text{M}]$  ( $\text{C}_{19}\text{H}_{20}\text{ClNO}$ ) from  $[\text{M}+\text{Na}]^+$  is 336.1126, found 336.1127.

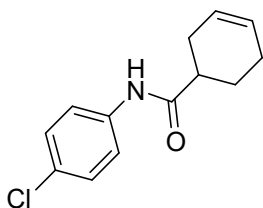

#### N-(4-chlorophenyl)cyclohex-3-ene-1-carboxamide (1aa)

Compound **1aa** was prepared according to **Method A**.

$^1\text{H}$  NMR (400 MHz,  $\text{DMSO}-d_6$ )  $\delta$  10.02 (s, 1H), 7.64 (d,  $J$  = 8.8 Hz, 2H), 7.49 – 7.19 (m, 2H), 6.30 – 5.11 (m, 2H), 2.61 – 2.51 (m, 1H), 2.30 – 1.98 (m, 4H), 1.88 (d,  $J$  = 12.1 Hz, 1H), 1.56 (dt,  $J$  = 12.3, 10.1 Hz, 1H).  $^{13}\text{C}$  NMR (101 MHz,  $\text{DMSO}-d_6$ )  $\delta$  165.9, 131.9, 131.6, 124.5, 124.2, 116.3, 111.3, 32.0, 28.3, 24.6, 23.8. **HRMS (ESI)**:  $m/z$  calculated for  $[\text{M}]$  ( $\text{C}_{13}\text{H}_{14}\text{ClNO}$ ) from  $[\text{M}+\text{Na}]^+$  is 258.0656, found 258.0637.

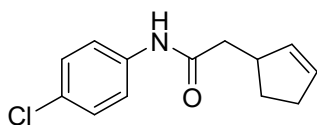

#### N-(4-chlorophenyl)-2-(cyclopent-2-en-1-yl)acetamide (1ab)

Compound **1ab** was prepared according to **Method A**.

$^1\text{H}$  NMR (400 MHz,  $\text{DMSO}-d_6$ )  $\delta$  10.01 (s, 1H), 7.62 (d,  $J$  = 8.8 Hz, 2H), 7.33 (d,  $J$  = 8.8 Hz, 2H), 5.73 (ddd,  $J$  = 22.7, 5.6, 2.2 Hz, 2H), 3.18 – 2.83 (m, 1H), 2.44 – 2.18 (m, 4H), 2.11 – 1.94 (m, 1H), 1.46 (ddt,  $J$  = 12.6, 9.0, 6.2 Hz, 1H).  $^{13}\text{C}$  NMR (101 MHz,  $\text{DMSO}-d_6$ )  $\delta$  170.5, 138.1, 134.3, 130.7, 128.5, 126.5, 120.5, 42.4, 42.1, 31.4, 29.0. **HRMS (ESI)**:  $m/z$  calculated for  $[\text{M}]$  ( $\text{C}_{13}\text{H}_{14}\text{ClNO}$ ) from  $[\text{M}+\text{Na}]^+$  is 258.0656, found 258.0638.

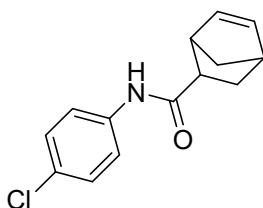

#### 2-methoxybenzene-1-sulfonyl fluoride (1ac)

Compound **1ac** was prepared according to **Method B**.



$^1\text{H}$  NMR (400 MHz,  $\text{DMSO}-d_6$ )  $\delta$  9.86 (s, 1H), 7.59 (d,  $J$  = 8.8 Hz, 2H), 7.30 (d,  $J$  = 8.8 Hz, 2H), 6.15 (dd,  $J$  = 5.5, 3.0 Hz, 1H), 5.83 (dd,  $J$  = 5.5, 2.7 Hz, 1H), 3.27 (s, 1H), 3.09 – 2.97 (m, 1H), 2.86 (s, 1H), 1.80 (ddd,  $J$  = 12.6, 9.3, 3.7 Hz, 1H), 1.48 – 1.26 (m, 3H).  $^{13}\text{C}$  NMR (101 MHz,  $\text{DMSO}-d_6$ )  $\delta$  172.0, 138.4, 137.2, 131.6, 128.4, 126.1, 120.5, 49.5, 46.1, 44.2, 42.2, 28.2. **HRMS (ESI):**  $m/z$  calculated for  $[\text{M}]$  ( $\text{C}_{14}\text{H}_{14}\text{ClNO}$ ) from  $[\text{M}+\text{Na}]^+$  is 270.0656, found 270.0641.

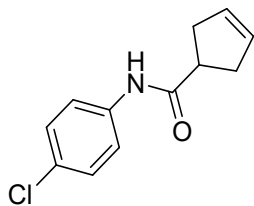

#### N-(4-chlorophenyl)cyclopent-3-ene-1-carboxamide (1ad)

Compound **1ad** was prepared according to **Method A**.

$^1\text{H}$  NMR (400 MHz,  $\text{DMSO}-d_6$ )  $\delta$  10.05 (s, 1H), 7.64 (d,  $J$  = 8.9 Hz, 2H), 7.34 (d,  $J$  = 8.9 Hz, 2H), 5.66 (s, 2H), 3.26 – 3.09 (m, 1H), 2.67 – 2.51 (m, 4H).  $^{13}\text{C}$  NMR (101 MHz,  $\text{DMSO}-d_6$ )  $\delta$  174.0, 138.3, 129.0, 128.5, 126.5, 120.6, 42.9, 36.6. **HRMS (ESI):**  $m/z$  calculated for  $[\text{M}]$  ( $\text{C}_{12}\text{H}_{12}\text{ClNO}$ ) from  $[\text{M}+\text{Na}]^+$  is 244.0500, found 244.0492.

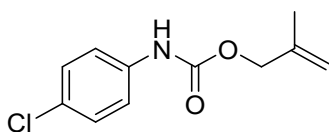

#### 2-methylallyl (4-chlorophenyl)carbamate (1af)

Compound **1af** was prepared according to **Method B**.

$^1\text{H}$  NMR (400 MHz,  $\text{CDCl}_3$ )  $\delta$  7.34 (d,  $J$  = 8.6 Hz, 2H), 7.26 (d,  $J$  = 8.9 Hz, 2H), 6.77 (s, 1H), 4.98 (d,  $J$  = 24.5 Hz, 2H), 4.58 (s, 2H), 1.78 (s, 3H).  $^{13}\text{C}$  NMR (101 MHz,  $\text{CDCl}_3$ )  $\delta$  153.3, 140.1, 136.5, 129.1, 128.6, 120.0, 113.1, 68.7, 19.5. **HRMS (ESI):**  $m/z$  calculated for  $[\text{M}]$  ( $\text{C}_{11}\text{H}_{12}\text{ClNO}_2$ ) from  $[\text{M}+\text{Na}]^+$  is 248.0449, found 248.0435.

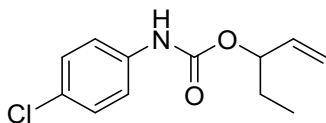

#### pent-1-en-3-yl (4-chlorophenyl)carbamate (1ag)

Compound **1ag** was prepared according to **Method B**.

$^1\text{H}$  NMR (400 MHz,  $\text{CDCl}_3$ )  $\delta$  7.34 (d,  $J$  = 8.7 Hz, 2H), 7.25 (d,  $J$  = 8.9 Hz, 2H), 6.71 (s, 1H), 5.81 (ddd,  $J$  = 17.1, 10.5, 6.5 Hz, 1H), 5.26 (ddt,  $J$  = 31.9, 10.5, 1.2 Hz, 2H), 5.16 (q,  $J$  = 6.5 Hz, 1H), 1.78 – 1.63 (m, 2H), 0.95 (t,  $J$  = 7.4 Hz, 3H).  $^{13}\text{C}$  NMR (101 MHz,  $\text{CDCl}_3$ )  $\delta$  153.0, 136.7, 136.4, 129.1, 128.4, 119.9, 117.1, 27.4, 9.5. **HRMS (ESI):**  $m/z$  calculated for  $[\text{M}]$  ( $\text{C}_{12}\text{H}_{14}\text{ClNO}_2$ ) from  $[\text{M}+\text{Na}]^+$  is 262.0605, found 262.0588.

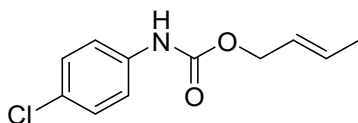

#### (E)-but-2-en-1-yl (4-chlorophenyl)carbamate (1ah)

Compound **1ah** was prepared according to **Method B**.

$^1\text{H}$  NMR (400 MHz,  $\text{CDCl}_3$ )  $\delta$  7.34 (d,  $J$  = 8.7 Hz, 2H), 7.27 (d,  $J$  = 8.8 Hz, 2H), 6.68 (s, 1H), 5.85 (dq,  $J$  = 13.0, 6.5 Hz, 1H), 5.72 – 5.56 (m, 1H), 4.60 (d,  $J$  = 6.5 Hz, 2H), 1.82 – 1.70 (m, 3H).  $^{13}\text{C}$  NMR (101 MHz,  $\text{CDCl}_3$ )  $\delta$  153.4, 136.6, 131.9, 129.1, 128.5, 125.2, 120.0, 66.2, 17.9. **HRMS (ESI):**  $m/z$  calculated for  $[\text{M}]$  ( $\text{C}_{11}\text{H}_{12}\text{ClNO}_2$ ) from  $[\text{M}+\text{Na}]^+$  is 248.0449, found 248.0443.

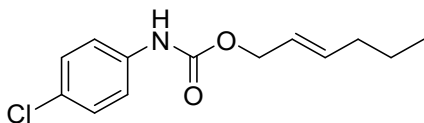

#### (E)-hex-2-en-1-yl (4-chlorophenyl)carbamate (1ai)

Compound **1ai** was prepared according to **Method B**.

$^1\text{H}$  NMR (400 MHz,  $\text{CDCl}_3$ )  $\delta$  7.34 (d,  $J$  = 8.8 Hz, 2H), 7.29 – 7.25 (m, 2H), 6.68 (s, 2H), 5.92 – 5.75 (m, 1H), 5.62 (dddd,  $J$  = 13.1, 7.9, 4.6, 3.2 Hz, 1H), 4.61 (dd,  $J$  = 6.5, 0.7 Hz, 2H), 2.06 (q,  $J$  = 7.1 Hz, 2H), 1.55 – 1.28 (m, 2H), 0.92 (t,  $J$  = 7.4 Hz, 3H).  $^{13}\text{C}$  NMR (101 MHz,  $\text{CDCl}_3$ )  $\delta$  153.4, 136.9, 136.6, 129.1, 124.0, 119.9, 66.3, 34.4, 22.1, 13.7. **HRMS (ESI):**  $m/z$  calculated for  $[\text{M}]$  ( $\text{C}_{13}\text{H}_{16}\text{ClNO}_2$ ) from  $[\text{M}+\text{Na}]^+$  is 276.0762, found 276.0759.

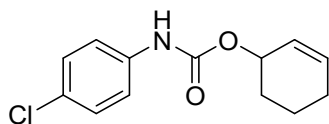

**cyclohex-2-en-1-yl (4-chlorophenyl)carbamate (1aj)**

Compound **1aj** was prepared according to **Method B**.

$^1\text{H}$  NMR (400 MHz,  $\text{CDCl}_3$ )  $\delta$  7.33 (d,  $J$  = 8.7 Hz, 2H), 7.25 (d,  $J$  = 8.9 Hz, 2H), 6.65 (s, 1H), 6.10 – 5.92 (m, 1H), 5.85 – 5.69 (m, 1H), 5.27 (dd,  $J$  = 3.4, 1.5 Hz, 1H), 2.17 – 1.64 (m, 6H).  $^{13}\text{C}$  NMR (101 MHz,  $\text{CDCl}_3$ )  $\delta$  153.2, 136.7, 133.1, 129.1, 128.3, 125.7, 119.9, 69.2, 28.6, 25.0, 18.8. **HRMS (ESI)**:  $m/z$  calculated for  $[\text{M}]$  ( $\text{C}_{13}\text{H}_{14}\text{ClNO}_2$ ) from  $[\text{M}+\text{Na}]^+$  is 274.0605, found 274.0601.

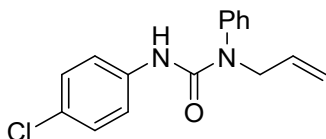

**1-allyl-3-(4-chlorophenyl)-1-phenylurea (1ak)**

Compound **1ak** was prepared according to **Method B**.

$^1\text{H}$  NMR (400 MHz,  $\text{CDCl}_3$ )  $\delta$  7.52 – 7.44 (m, 2H), 7.42 – 7.36 (m, 1H), 7.33 – 7.28 (m, 2H), 7.26 – 7.15 (m, 2H), 6.18 (s, 1H), 6.04 – 5.84 (m, 1H), 5.22 – 5.03 (m, 2H), 4.33 (dt,  $J$  = 6.2, 1.3 Hz, 2H).  $^{13}\text{C}$  NMR (101 MHz,  $\text{CDCl}_3$ )  $\delta$  153.8, 141.2, 137.5, 133.9, 130.4, 128.8, 128.6, 128.4, 127.9, 120.5, 117.7, 52.4. **HRMS (ESI)**:  $m/z$  calculated for  $[\text{M}]$  ( $\text{C}_{16}\text{H}_{15}\text{ClN}_2\text{O}$ ) from  $[\text{M}+\text{H}]^+$  is 287.0946, found 287.0942.

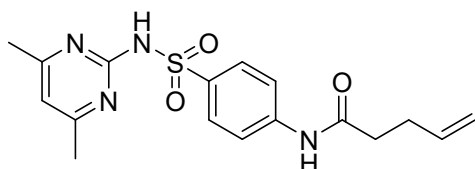

**N-(4-(N-(4,6-dimethylpyrimidin-2-yl)sulfamoyl)phenyl)pent-4-enamide (1al)**

Compound **1al** was prepared according to **Method A**.

$^1\text{H}$  NMR (400 MHz,  $\text{DMSO}-d_6$ )  $\delta$  11.59 (s, 1H), 10.26 (s, 1H), 7.93 (d,  $J$  = 8.0 Hz, 2H), 7.74 (d,  $J$  = 8.0 Hz, 2H), 6.73 (s, 1H), 5.83 (dd,  $J$  = 16.3, 9.6 Hz, 1H), 5.01 (dd,  $J$  = 42.7, 13.5 Hz, 2H), 2.43 (d,  $J$  = 6.8 Hz, 2H), 2.33 (d,  $J$  = 5.9 Hz, 2H), 2.24 (s, 6H).  $^{13}\text{C}$  NMR (101 MHz,  $\text{DMSO}-d_6$ )  $\delta$  171.1, 167.3, 156.2, 142.8, 137.4, 134.2, 129.3, 117.9, 115.3, 113.6, 35.5, 28.8, 22.9. **HRMS (ESI)**:  $m/z$  calculated for  $[\text{M}]$  ( $\text{C}_{17}\text{H}_{20}\text{N}_4\text{O}_3\text{S}$ ) from  $[\text{M}+\text{H}]^+$  is 361.1329, found 361.1348.

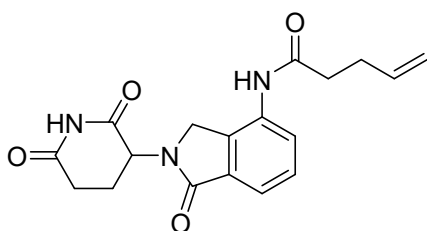

**N-(2-(2,6-dioxopiperidin-3-yl)-1-oxoisindolin-4-yl)pent-4-enamide (1am)**

Compound **1am** was prepared according to **Method A**.

$^1\text{H}$  NMR (400 MHz,  $\text{CDCl}_3$ )  $\delta$  7.77 (s, 1H), 7.30 (s, 1H), 7.17 (t,  $J$  = 8.1 Hz, 1H), 6.98 (d,  $J$  = 7.9 Hz, 1H), 6.72 – 6.57 (m, 1H), 5.84 (ddd,  $J$  = 15.9, 8.6, 4.9 Hz, 1H), 5.05 (dd,  $J$  = 25.6, 13.7 Hz, 2H), 3.75 (s, 3H), 2.44 (s, 4H).  $^{13}\text{C}$  NMR (101 MHz,  $\text{CDCl}_3$ )  $\delta$  172.9, 171.1, 170.6, 167.8, 137.5, 133.8, 133.7, 132.6, 128.6, 125.2, 119.0, 115.3, 51.5, 46.5, 34.9, 31.2, 29.1, 22.6. **HRMS (ESI)**:  $m/z$  calculated for  $[\text{M}]$  ( $\text{C}_{18}\text{H}_{19}\text{N}_3\text{O}_4$ ) from  $[\text{M}+\text{H}]^+$  is 342.1448, found 342.1458.

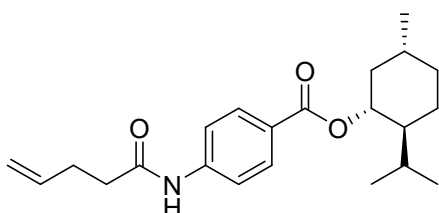

**(1R,2S,5R)-2-isopropyl-5-methylcyclohexyl 4-(pent-4-enamido)benzoate (1an)**

Compound **1an** was prepared according to **Method A**.

<sup>1</sup>H NMR (400 MHz, CDCl<sub>3</sub>) δ 8.65 (s, 1H), 7.96 (d, *J* = 8.7 Hz, 2H), 7.65 (d, *J* = 8.6 Hz, 2H), 5.80 (tt, *J* = 16.4, 6.2 Hz, 1H), 5.01 (ddd, *J* = 13.7, 11.5, 1.3 Hz, 2H), 4.88 (td, *J* = 10.8, 4.3 Hz, 1H), 2.46 (ddd, *J* = 12.5, 6.9, 3.6 Hz, 4H), 2.07 (d, *J* = 11.9 Hz, 1H), 2.00 – 1.83 (m, 1H), 1.80 – 1.63 (m, 2H), 1.51 (ddd, *J* = 19.8, 14.5, 5.7 Hz, 2H), 1.08 (dd, *J* = 23.3, 12.0 Hz, 2H), 0.89 (d, *J* = 6.8 Hz, 7H), 0.75 (d, *J* = 6.9 Hz, 3H). <sup>13</sup>C NMR (101 MHz, CDCl<sub>3</sub>) δ 171.6, 166.0, 142.4, 136.6, 130.7, 125.9, 119.0, 115.8, 74.9, 47.2, 41.0, 36.7, 34.2, 31.4, 29.3, 26.5, 23.7, 22.0, 20.7, 16.6. **HRMS (ESI)**: *m/z* calculated for [M] (C<sub>22</sub>H<sub>31</sub>NO<sub>3</sub>) from [M+Na]<sup>+</sup> is 380.2196, found 380.2192.

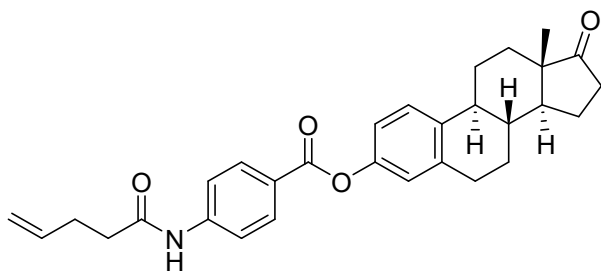

**(8R,9S,13S,14S)-13-methyl-17-oxo-7,8,9,11,12,13,14,15,16,17-decahydro-6H-cyclopenta[a]phenanthren-3-yl 4-(pent-4-enamido) benzoate (1ao)**

Compound **1ao** was prepared according to **Method A**.

<sup>1</sup>H NMR (400 MHz, CDCl<sub>3</sub>) δ 8.12 (d, *J* = 8.7 Hz, 2H), 7.90 (s, 1H), 7.65 (d, *J* = 8.7 Hz, 2H), 7.31 (d, *J* = 8.5 Hz, 1H), 7.07 – 6.85 (m, 2H), 6.00 – 5.75 (m, 1H), 5.22 – 4.99 (m, 2H), 3.02 – 2.83 (m, 2H), 2.62 – 1.93 (m, 12H), 1.74 – 1.39 (m, 5H), 0.92 (s, 3H). <sup>13</sup>C NMR (101 MHz, CDCl<sub>3</sub>) δ 171.1, 165.2, 148.9, 142.9, 138.2, 137.5, 136.7, 131.5, 126.5, 124.7, 121.8, 118.9, 118.9, 116.1, 50.5, 48.1, 44.2, 38.0, 36.9, 36.0, 31.6, 29.5, 29.3, 26.4, 25.8, 21.6, 13.9. **HRMS (ESI)**: *m/z* calculated for [M] (C<sub>30</sub>H<sub>33</sub>NO<sub>4</sub>) from [M+H]<sup>+</sup> is 472.2482, found 472.2514.

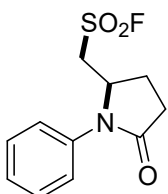

**(5-oxo-1-phenylpyrrolidin-2-yl)methanesulfonyl fluoride (2a)**

Compound **2a** was prepared according to **General Procedure**. The residue was purified by flash column chromatography on silica (petroleum ether/ethyl acetate 5:1) to give a white solid (15.4 mg, 60% yield).

<sup>1</sup>H NMR (400 MHz, CDCl<sub>3</sub>) δ 7.44 (dt, *J* = 9.2, 1.9 Hz, 2H), 7.40 – 7.34 (m, 2H), 7.32 – 7.26 (m, 1H), 4.88 – 4.62 (m, 1H), 3.67 (ddd, *J* = 14.6, 4.5, 2.3 Hz, 1H), 3.40 (ddd, *J* = 14.6, 10.0, 3.0 Hz, 1H), 2.83 – 2.52 (m, 3H), 2.36 – 2.17 (m, 1H). <sup>13</sup>C NMR (101 MHz, CDCl<sub>3</sub>) δ 173.5, 135.8, 129.8, 127.1, 123.8, 54.9, 53.1 (d, *J* = 14.8 Hz), 30.3, 23.8. <sup>19</sup>F NMR (376 MHz, CDCl<sub>3</sub>) δ 60.51. **HRMS (ESI)**: *m/z* calculated for [M] (C<sub>11</sub>H<sub>12</sub>FNO<sub>3</sub>S) from [M+H]<sup>+</sup> is 258.0595, found 258.0603

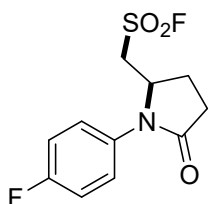

**(1-(4-fluorophenyl)-5-oxopyrrolidin-2-yl)methanesulfonyl fluoride (2b)**

Compound **2b** was prepared according to **General Procedure**. The residue was purified by flash column chromatography on silica (petroleum ether/ethyl acetate 5:1) to give a white solid (15.4 mg, 56% yield).

<sup>1</sup>H NMR (400 MHz, CDCl<sub>3</sub>) δ 7.40 – 7.28 (m, 2H), 7.20 – 7.08 (m, 2H), 4.79 – 4.60 (m, 1H), 3.64 (ddd, *J* = 14.6, 4.3, 2.4 Hz, 1H), 3.41 (ddd, *J* = 14.6, 9.8, 2.8 Hz, 1H), 2.76 – 2.54 (m, 3H), 2.34 – 2.19 (m, 1H). <sup>13</sup>C NMR (101 MHz, CDCl<sub>3</sub>) δ 173.5, 161.1 (d, *J* = 247.9 Hz), 131.8 (d, *J* = 3.0 Hz), 125.9 (d, *J* = 8.5 Hz), 116.8 (d, *J* = 22.8 Hz), 55.2, 53.1 (d, *J* = 14.9 Hz), 30.1, 23.9. <sup>19</sup>F NMR (376 MHz, CDCl<sub>3</sub>) δ 60.78, -113.72. **HRMS (ESI)**: *m/z* calculated for [M] (C<sub>11</sub>H<sub>11</sub>F<sub>2</sub>NO<sub>3</sub>S) from [M+H]<sup>+</sup> is 276.0500, found 276.0495

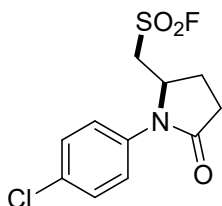

**(1-(4-chlorophenyl)-5-oxopyrrolidin-2-yl)methanesulfonyl fluoride (2c)**

Compound **2c** was prepared according to the **General Procedure**. The residue was purified by flash column chromatography on silica (petroleum ether/ethyl acetate 5:1) to give a white solid (22.7 mg, 78% yield).

$^1\text{H}$  NMR (400 MHz,  $\text{CDCl}_3$ )  $\delta$  7.45 – 7.39 (m, 2H), 7.39 – 7.33 (m, 2H), 4.95 – 4.65 (m, 1H), 3.66 (ddd,  $J$  = 14.6, 4.3, 2.3 Hz, 1H), 3.41 (ddd,  $J$  = 14.6, 9.8, 2.7 Hz, 1H), 2.81 – 2.58 (m, 3H), 2.39 – 2.20 (m, 1H).  $^{13}\text{C}$  NMR (101 MHz,  $\text{CDCl}_3$ )  $\delta$  173.4, 134.4, 132.5, 130.0, 124.7, 54.7, 53.0 (d,  $J$  = 14.9 Hz), 30.2, 23.8.  $^{19}\text{F}$  NMR (376 MHz,  $\text{CDCl}_3$ )  $\delta$  60.75. **HRMS (ESI):**  $m/z$  calculated for  $[\text{M}]$  ( $\text{C}_{11}\text{H}_{11}\text{NO}_3\text{FSCl}$ ) from  $[\text{M}+\text{H}]^+$  is 292.0205, found 292.0201

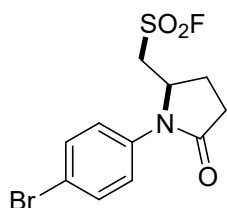

**(1-(4-bromophenyl)-5-oxopyrrolidin-2-yl)methanesulfonyl fluoride (2d)**

Compound **2d** was prepared according to **General Procedure**. The residue was purified by flash column chromatography on silica (petroleum ether/ethyl acetate 5:1) to give a white solid (24.1 mg, 72% yield).

$^1\text{H}$  NMR (400 MHz,  $\text{CDCl}_3$ )  $\delta$  7.63 – 7.47 (m, 2H), 7.34 – 7.17 (m, 2H), 4.81 – 4.71 (m, 1H), 3.65 (ddd,  $J$  = 14.6, 4.3, 2.3 Hz, 1H), 3.42 (ddd,  $J$  = 14.6, 9.8, 2.7 Hz, 1H), 2.83 – 2.51 (m, 3H), 2.34 – 2.19 (m, 1H).  $^{13}\text{C}$  NMR (126 MHz,  $\text{CDCl}_3$ )  $\delta$  173.3, 134.9, 132.9, 124.9, 120.3, 54.6, 53.0 (d,  $J$  = 15.0 Hz), 30.2, 23.7.  $^{19}\text{F}$  NMR (376 MHz,  $\text{CDCl}_3$ )  $\delta$  60.72. **HRMS (ESI):**  $m/z$  calculated for  $[\text{M}]$  ( $\text{C}_{11}\text{H}_{11}\text{NO}_3\text{FSBr}$ ) from  $[\text{M}+\text{H}]^+$  is 335.9700, found 335.9706

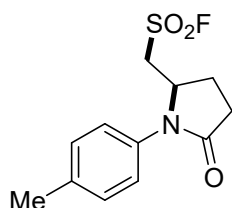

**(5-oxo-1-(p-tolyl)pyrrolidin-2-yl)methanesulfonyl fluoride (2e)**

Compound **2e** was prepared according to **General Procedure**. The residue was purified by flash column chromatography on silica (petroleum ether/ethyl acetate 5:1) to give a white solid (11.4 mg, 42% yield).

$^1\text{H}$  NMR (400 MHz,  $\text{CDCl}_3$ )  $\delta$  7.28 – 7.15 (m, 4H), 4.82 – 4.62 (m, 1H), 3.66 (ddd,  $J$  = 14.6, 4.5, 2.4 Hz, 1H), 3.38 (ddd,  $J$  = 14.6, 10.0, 3.1 Hz, 1H), 2.74 – 2.56 (m, 3H), 2.35 (s, 3H), 2.28 – 2.17 (m, 1H).  $^{13}\text{C}$  NMR (101 MHz,  $\text{CDCl}_3$ )  $\delta$  173.5, 137.2, 133.1, 130.4, 124.0, 55.1, 53.2 (d,  $J$  = 14.6 Hz), 30.2, 23.9, 21.1.  $^{19}\text{F}$  NMR (376 MHz,  $\text{CDCl}_3$ )  $\delta$  60.47. **HRMS (ESI):**  $m/z$  calculated for  $[\text{M}]$  ( $\text{C}_{12}\text{H}_{14}\text{NO}_3\text{FS}$ ) from  $[\text{M}+\text{H}]^+$  is 272.0751, found 272.0739

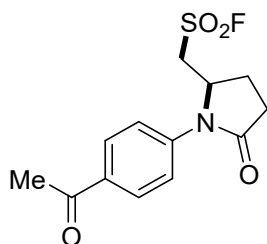

**(1-(4-acetylphenyl)-5-oxopyrrolidin-2-yl)methanesulfonyl fluoride (2f)**

Compound **2f** was prepared according to **General Procedure**. The residue was purified by flash column chromatography on silica (petroleum ether/ethyl acetate 3:1 to 1:1) to give a white solid (15.0 mg, 50% yield).

$^1\text{H}$  NMR (400 MHz,  $\text{CDCl}_3$ )  $\delta$  8.03 (d,  $J$  = 8.6 Hz, 2H), 7.58 (d,  $J$  = 8.6 Hz, 2H), 4.90 (ddd,  $J$  = 9.8, 6.1, 4.0 Hz, 1H), 3.69 (ddd,  $J$  = 14.7, 4.0, 2.1 Hz, 1H), 3.47 (ddd,  $J$  = 14.6, 9.8, 2.6 Hz, 1H), 2.84 – 2.62 (m, 3H), 2.60 (s, 3H), 2.38 – 2.25 (m, 1H).  $^{13}\text{C}$  NMR (126 MHz,  $\text{CDCl}_3$ )  $\delta$  196.8, 173.4, 140.2, 134.7, 130.0, 122.0, 54.2, 52.8 (d,  $J$  = 15.1 Hz), 30.4, 26.7, 23.6.  $^{19}\text{F}$  NMR (376 MHz,  $\text{CDCl}_3$ )  $\delta$  60.61. **HRMS (ESI):**  $m/z$  calculated for  $[\text{M}]$  ( $\text{C}_{13}\text{H}_{14}\text{NO}_4\text{FS}$ ) from  $[\text{M}+\text{H}]^+$  is 322.0520, found 322.0517

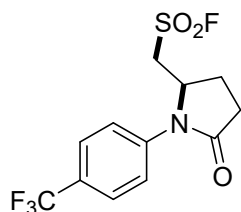

#### (5-oxo-1-(4-(trifluoromethyl)phenyl)pyrrolidin-2-yl)methanesulfonyl fluoride (2g)

Compound **2g** was prepared according to **General Procedure**. The residue was purified by flash column chromatography on silica (petroleum ether/ethyl acetate 5:1) to give a white solid (8.1 mg, 25% yield).

$^1\text{H}$  NMR (500 MHz,  $\text{CDCl}_3$ )  $\delta$  7.71 (d,  $J$  = 8.5 Hz, 2H), 7.60 (d,  $J$  = 8.4 Hz, 2H), 4.88 (s, 1H), 3.68 (d,  $J$  = 14.7 Hz, 1H), 3.56 – 3.36 (m, 1H), 2.91 – 2.56 (m, 3H), 2.32 (ddd,  $J$  = 12.7, 7.2, 3.6 Hz, 1H).  $^{13}\text{C}$  NMR (101 MHz,  $\text{CDCl}_3$ )  $\delta$  173.5, 139.1, 128.4 (d,  $J$  = 33.1 Hz), 127.0 (dd,  $J$  = 7.2, 3.6 Hz), 125.1, 122.6, 54.3, 52.8 (d,  $J$  = 15.1 Hz), 30.3, 23.7.  $^{19}\text{F}$  NMR (376 MHz,  $\text{CDCl}_3$ )  $\delta$  60.70 (s), -62.56 (s).

**HRMS (ESI):**  $m/z$  calculated for  $[\text{M}]$  ( $\text{C}_{12}\text{H}_{11}\text{NO}_3\text{F}_4\text{S}$ ) from  $[\text{M}+\text{H}]^+$  is 326.0469, found 326.0468

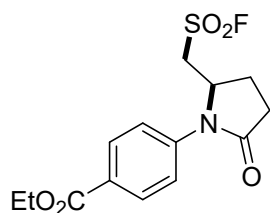

#### ethyl 4-(2-((fluorosulfonyl)methyl)-5-oxopyrrolidin-1-yl)benzoate (2h)

Compound **2h** was prepared according to **General Procedure**. The residue was purified by flash column chromatography on silica (petroleum ether/ethyl acetate 5:1 to 3:1) to give a white solid (18.4 mg, 56% yield).

$^1\text{H}$  NMR (400 MHz,  $\text{CDCl}_3$ )  $\delta$  8.10 (d,  $J$  = 8.5 Hz, 2H), 7.54 (d,  $J$  = 8.6 Hz, 2H), 4.87 (d,  $J$  = 2.9 Hz, 1H), 4.37 (q,  $J$  = 7.1 Hz, 2H), 3.77 – 3.59 (m, 1H), 3.57 – 3.36 (m, 1H), 2.85 – 2.45 (m, 3H), 2.42 – 2.05 (m, 1H), 1.38 (t,  $J$  = 7.1 Hz, 3H).  $^{13}\text{C}$  NMR (101 MHz,  $\text{CDCl}_3$ )  $\delta$  173.4, 165.7, 140.0, 131.1, 128.2, 121.9, 61.2, 54.3, 52.7 (d,  $J$  = 15.0 Hz), 30.4, 23.6, 14.4.  $^{19}\text{F}$  NMR (376 MHz,  $\text{CDCl}_3$ )  $\delta$  60.52.

**HRMS (ESI):**  $m/z$  calculated for  $[\text{M}]$  ( $\text{C}_{14}\text{H}_{16}\text{NO}_5\text{FS}$ ) from  $[\text{M}+\text{H}]^+$  is 352.0625, found 352.0609

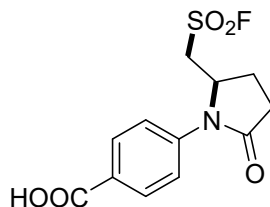

#### 4-(2-((fluorosulfonyl)methyl)-5-oxopyrrolidin-1-yl)benzoic acid (2i)

Compound **2i** was prepared according to **General Procedure**. The residue was purified by flash column chromatography on silica (petroleum ether/ethyl acetate 3:1 to 1:1) to give a white solid (12.6 mg, 42% yield).

$^1\text{H}$  NMR (400 MHz,  $\text{DMSO}-d_6$ )  $\delta$  12.90 (s, 1H), 7.98 (d,  $J$  = 8.7 Hz, 2H), 7.66 (d,  $J$  = 8.7 Hz, 2H), 5.03 (t,  $J$  = 7.9 Hz, 1H), 4.38 (ddd,  $J$  = 14.1, 8.6, 5.2 Hz, 1H), 4.12 (ddd,  $J$  = 15.1, 5.0, 2.5 Hz, 1H), 2.77 (dt,  $J$  = 15.3, 7.9 Hz, 1H), 2.59 – 2.39 (m, 2H), 2.25 – 2.07 (m, 1H).  $^{13}\text{C}$  NMR (101 MHz,  $\text{DMSO}-d_6$ )  $\delta$  173.8, 166.8, 140.7, 130.2, 127.2, 122.0, 53.8, 51.6 (d,  $J$  = 11.7 Hz), 30.1, 22.7.  $^{19}\text{F}$  NMR (376 MHz,  $\text{DMSO}-d_6$ )  $\delta$  60.51. **HRMS (ESI):**  $m/z$  calculated for  $[\text{M}]$  ( $\text{C}_{12}\text{H}_{12}\text{NO}_5\text{FS}$ ) from  $[\text{M}+\text{H}]^+$  is 300.0347, found 300.0345

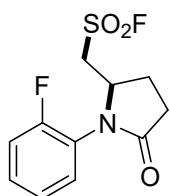

#### (1-(2-fluorophenyl)-5-oxopyrrolidin-2-yl)methanesulfonyl fluoride (2j)

Compound **2j** was prepared according to **General Procedure**. The residue was purified by flash column chromatography on silica (petroleum ether/ethyl acetate 5:1) to give a white solid (17.6 mg, 64% yield).

$^1\text{H}$  NMR (400 MHz,  $\text{CDCl}_3$ )  $\delta$  7.46 – 7.36 (m, 1H), 7.36 – 7.19 (m, 3H), 4.67 (ddd,  $J$  = 9.6, 5.1, 2.4 Hz, 1H), 3.61 – 3.36 (m, 2H), 2.82 – 2.53 (m, 3H), 2.39 – 2.25 (m, 1H).  $^{13}\text{C}$  NMR (101 MHz,  $\text{CDCl}_3$ )  $\delta$  174.0, 157.9 (d,  $J$  = 249.4 Hz), 130.4 (d,  $J$  = 6.7 Hz), 129.6, 125.3,

123.2, 117.2 (d,  $J = 20.0$  Hz), 55.5, 53.5 (d,  $J = 14.8$  Hz), 29.4, 24.7.  $^{19}\text{F}$  NMR (376 MHz,  $\text{CDCl}_3$ )  $\delta$  60.94, -119.82. **HRMS (ESI):**  $m/z$  calculated for  $[\text{M}]$  ( $\text{C}_{11}\text{H}_{11}\text{NO}_3\text{F}_2\text{S}$ ) from  $[\text{M}+\text{H}]^+$  is 276.0500, found 276.0490

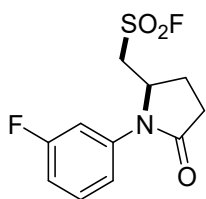

**(1-(3-fluorophenyl)-5-oxopyrrolidin-2-yl)methanesulfonyl fluoride (2k)**

Compound **2k** was prepared according to **General Procedure**. The residue was purified by flash column chromatography on silica (petroleum ether/ethyl acetate 5:1) to give a white solid (17.0 mg, 62% yield).

$^1\text{H}$  NMR (400 MHz,  $\text{CDCl}_3$ )  $\delta$  7.40 (td,  $J = 8.2, 6.5$  Hz, 1H), 7.31 (dt,  $J = 10.4, 2.2$  Hz, 1H), 7.12 (dd,  $J = 8.1, 1.4$  Hz, 1H), 6.98 (td,  $J = 8.2, 1.8$  Hz, 1H), 4.78 (ddd,  $J = 9.8, 4.9, 2.5$  Hz, 1H), 3.69 (ddd,  $J = 14.7, 4.3, 2.2$  Hz, 1H), 3.44 (ddd,  $J = 14.6, 9.8, 2.9$  Hz, 1H), 2.83 – 2.54 (m, 3H), 2.35 – 2.14 (m, 1H).  $^{13}\text{C}$  NMR (101 MHz,  $\text{CDCl}_3$ )  $\delta$  173.4, 163.2 (d,  $J = 247.6$  Hz), 137.5 (d,  $J = 10.1$  Hz), 131.0 (d,  $J = 9.2$  Hz), 118.0 (d,  $J = 3.1$  Hz), 113.7 (d,  $J = 21.2$  Hz), 110.9 (d,  $J = 25.0$  Hz), 54.6, 52.8 (d,  $J = 14.9$  Hz), 30.3, 23.6.  $^{19}\text{F}$  NMR (376 MHz,  $\text{CDCl}_3$ )  $\delta$  60.57, -109.75. **HRMS (ESI):**  $m/z$  calculated for  $[\text{M}]$  ( $\text{C}_{11}\text{H}_{11}\text{NO}_3\text{F}_2\text{S}$ ) from  $[\text{M}+\text{H}]^+$  is 276.0500, found 276.0500

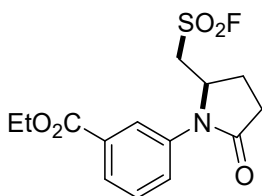

**ethyl 3-(2-((fluorosulfonyl)methyl)-5-oxopyrrolidin-1-yl)benzoate (2l)**

Compound **2l** was prepared according to **General Procedure**. The residue was purified by flash column chromatography on silica (petroleum ether/ethyl acetate 5:1 to 3:1) to give a white solid (20.4 mg, 62% yield).

$^1\text{H}$  NMR (400 MHz,  $\text{CDCl}_3$ )  $\delta$  8.02 – 7.80 (m, 2H), 7.68 (ddd,  $J = 8.0, 2.1, 1.0$  Hz, 1H), 7.52 (t,  $J = 7.9$  Hz, 1H), 4.84 (ddd,  $J = 9.4, 5.8, 2.4$  Hz, 1H), 4.49 – 4.27 (m, 2H), 3.66 (ddd,  $J = 14.7, 4.0, 2.4$  Hz, 1H), 3.45 (ddd,  $J = 14.6, 9.7, 3.3$  Hz, 1H), 2.87 – 2.52 (m, 3H), 2.39 – 2.20 (m, 1H), 1.39 (t,  $J = 7.1$  Hz, 3H).  $^{13}\text{C}$  NMR (101 MHz,  $\text{CDCl}_3$ )  $\delta$  173.5, 165.7, 136.2, 132.2, 129.9, 128.3, 128.0, 124.2, 61.5, 54.8, 53.0 (d,  $J = 14.9$  Hz), 30.2, 23.8, 14.3.  $^{19}\text{F}$  NMR (376 MHz,  $\text{CDCl}_3$ )  $\delta$  60.73. **HRMS (ESI):**  $m/z$  calculated for  $[\text{M}]$  ( $\text{C}_{14}\text{H}_{16}\text{NO}_5\text{FS}$ ) from  $[\text{M}+\text{H}]^+$  is 352.0625, found 352.0608

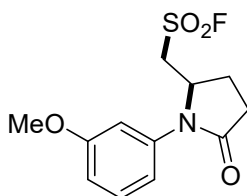

**(1-(3-methoxyphenyl)-5-oxopyrrolidin-2-yl)methanesulfonyl fluoride (2m)**

Compound **2m** was prepared according to **General Procedure**. The residue was purified by flash column chromatography on silica (petroleum ether/ethyl acetate 5:1 to 3:1) to give a colourless oil (10.1 mg, 35% yield).

$^1\text{H}$  NMR (400 MHz,  $\text{CDCl}_3$ )  $\delta$  7.34 (t,  $J = 8.2$  Hz, 1H), 7.01 (t,  $J = 2.2$  Hz, 1H), 6.91 (dd,  $J = 7.9, 1.8$  Hz, 1H), 6.82 (dd,  $J = 8.3, 2.4$  Hz, 1H), 4.86 – 4.61 (m, 1H), 3.81 (s, 3H), 3.71 (ddd,  $J = 14.6, 4.5, 2.2$  Hz, 1H), 3.50 – 3.32 (m, 1H), 2.79 – 2.56 (m, 3H), 2.33 – 2.17 (m, 1H).  $^{13}\text{C}$  NMR (101 MHz,  $\text{CDCl}_3$ )  $\delta$  173.4, 160.7, 137.0, 130.5, 115.4, 112.7, 109.8, 55.5, 55.0, 53.1 (d,  $J = 14.7$  Hz), 30.4, 23.8.  $^{19}\text{F}$  NMR (376 MHz,  $\text{CDCl}_3$ )  $\delta$  60.44. **HRMS (ESI):**  $m/z$  calculated for  $[\text{M}]$  ( $\text{C}_{12}\text{H}_{14}\text{NO}_4\text{FS}$ ) from  $[\text{M}+\text{H}]^+$  is 310.0520, found 310.0506

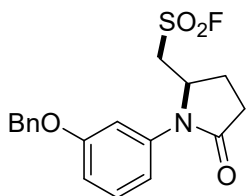

**(1-(3-(benzyloxy)phenyl)-5-oxopyrrolidin-2-yl)methanesulfonyl fluoride (2n)**

Compound **2n** was prepared according to **General Procedure**. The residue was purified by flash column chromatography on silica (petroleum ether/ethyl acetate 5:1 to 3:1) to give a colourless oil (12.3 mg, 34% yield).

<sup>1</sup>H NMR (400 MHz, CDCl<sub>3</sub>) δ 7.47 – 7.28 (m, 6H), 7.10 (t, *J* = 2.2 Hz, 1H), 6.91 (td, *J* = 8.1, 2.2 Hz, 2H), 5.12 – 5.03 (m, 2H), 4.82 – 4.58 (m, 1H), 3.69 (ddd, *J* = 14.6, 4.5, 2.3 Hz, 1H), 3.37 (ddd, *J* = 14.5, 10.0, 2.8 Hz, 1H), 2.84 – 2.53 (m, 3H), 2.35 – 2.18 (m, 1H). <sup>13</sup>C NMR (101 MHz, CDCl<sub>3</sub>) δ 173.4, 159.8, 137.0, 136.5, 130.6, 128.7, 128.3, 127.6, 115.7, 113.6, 110.7, 70.3, 55.0, 53.1 (d, *J* = 14.7 Hz), 30.4, 23.8. <sup>19</sup>F NMR (376 MHz, CDCl<sub>3</sub>) δ 60.61. **HRMS (ESI):** *m/z* calculated for [M] (C<sub>18</sub>H<sub>18</sub>NO<sub>4</sub>FS) from [M+H]<sup>+</sup> is 386.0833, found 386.0816

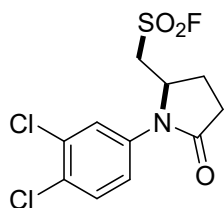

#### (1-(3,4-dichlorophenyl)-5-oxopyrrolidin-2-yl)methanesulfonyl fluoride (2o)

Compound **2o** was prepared according to **General Procedure**. The residue was purified by flash column chromatography on silica (petroleum ether/ethyl acetate 5:1 to 3:1) to give a white solid (20.2 mg, 62% yield).

<sup>1</sup>H NMR (400 MHz, CDCl<sub>3</sub>) δ 7.64 (d, *J* = 2.4 Hz, 1H), 7.51 (d, *J* = 8.7 Hz, 1H), 7.24 (dd, *J* = 8.8, 2.5 Hz, 1H), 4.86 – 4.64 (m, 1H), 3.73 – 3.57 (m, 1H), 3.45 (ddd, *J* = 14.4, 9.6, 2.4 Hz, 1H), 2.88 – 2.51 (m, 3H), 2.46 – 2.15 (m, 1H). <sup>13</sup>C NMR (126 MHz, CDCl<sub>3</sub>) δ 173.3, 135.4, 133.8, 131.3, 130.7, 125.2, 122.0, 54.5, 52.8 (d, *J* = 15.1 Hz), 30.1, 23.6. <sup>19</sup>F NMR (376 MHz, CDCl<sub>3</sub>) δ 60.89. **HRMS (ESI):** *m/z* calculated for [M] (C<sub>11</sub>H<sub>10</sub>NO<sub>3</sub>FSCl<sub>2</sub>) from [M+H]<sup>+</sup> is 325.9815, found 325.9822

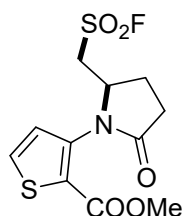

#### methyl 3-(2-((fluorosulfonyl)methyl)-5-oxopyrrolidin-1-yl)thiophene-2-carboxylate (2p)

Compound **2p** was prepared according to **General Procedure**. The residue was purified by flash column chromatography on silica (petroleum ether/ethyl acetate 3:1 to 1:1) to give a foamed solid (19.3 mg, 60% yield).

<sup>1</sup>H NMR (400 MHz, DMSO-*d*<sub>6</sub>) δ 7.94 (d, *J* = 5.3 Hz, 1H), 7.19 (d, *J* = 5.3 Hz, 1H), 4.67 (ddd, *J* = 11.2, 7.2, 3.4 Hz, 1H), 4.36 (ddd, *J* = 14.7, 8.8, 5.8 Hz, 1H), 4.03 (ddd, *J* = 14.9, 5.4, 3.3 Hz, 1H), 3.78 (s, 3H), 2.70 – 2.56 (m, 1H), 2.53 – 2.31 (m, 2H), 2.17 (ddd, *J* = 15.6, 8.3, 3.6 Hz, 1H). <sup>13</sup>C NMR (126 MHz, DMSO-*d*<sub>6</sub>) δ 173.6, 160.7, 139.1, 131.6, 128.4, 125.6, 55.6, 52.5 (d, *J* = 11.9 Hz), 52.1, 28.9, 24.1. <sup>19</sup>F NMR (376 MHz, DMSO-*d*<sub>6</sub>) δ 59.85. **HRMS (ESI):** *m/z* calculated for [M] (C<sub>11</sub>H<sub>12</sub>NO<sub>5</sub>FS<sub>2</sub>) from [M+H]<sup>+</sup> is 344.0033, found 344.0023

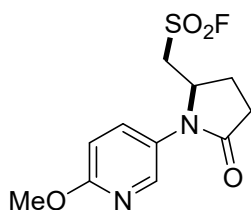

#### (1-(6-methoxypyridin-3-yl)-5-oxopyrrolidin-2-yl)methanesulfonyl fluoride (2q)

Compound **2q** was prepared according to **General Procedure**. The residue was purified by flash column chromatography on silica (petroleum ether/ethyl acetate 3:1 to 1:1) to give a white solid (11.5 mg, 40% yield).

<sup>1</sup>H NMR (400 MHz, DMSO-*d*<sub>6</sub>) δ 8.18 (d, *J* = 2.6 Hz, 1H), 7.77 (dd, *J* = 8.8, 2.7 Hz, 1H), 6.89 (d, *J* = 8.8 Hz, 1H), 4.79 (td, *J* = 7.9, 3.8 Hz, 1H), 4.41 – 4.24 (m, 1H), 4.13 (ddd, *J* = 15.0, 5.1, 3.1 Hz, 1H), 3.86 (s, 3H), 2.73 – 2.58 (m, 1H), 2.43 (ddd, *J* = 13.6, 11.1, 6.6 Hz, 2H), 2.25 – 2.02 (m, 1H). <sup>13</sup>C NMR (101 MHz, DMSO-*d*<sub>6</sub>) δ 173.8, 161.5, 143.3, 136.2, 127.3, 110.5, 54.7, 53.3, 52.1 (d, *J* = 11.7 Hz), 29.4, 23.2. <sup>19</sup>F NMR (376 MHz, DMSO-*d*<sub>6</sub>) δ 60.66. **HRMS (ESI):** *m/z* calculated for [M] (C<sub>11</sub>H<sub>13</sub>N<sub>2</sub>O<sub>4</sub>FS) from [M+H]<sup>+</sup> is 289.0653, found 289.0644

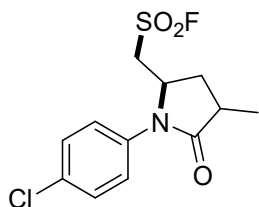

**(1-(4-chlorophenyl)-4-methyl-5-oxopyrrolidin-2-yl)methanesulfonyl fluoride (2r)**

Compound **2r** was prepared according to **General Procedure**. The residue was purified by flash column chromatography on silica (petroleum ether/ethyl acetate 5:1) to give a white solid (21.4 mg, 70% yield, *dr* = 2.5:1).

<sup>1</sup>H NMR (500 MHz, CDCl<sub>3</sub>) δ 7.42 (dd, *J* = 21.0, 8.9 Hz, 4H), 4.73 (dd, *J* = 9.8, 8.1 Hz, 1H), 3.60 (dd, *J* = 12.0, 2.7 Hz, 1H), 3.54 – 3.32 (m, 1H), 2.89 – 2.70 (m, 1H), 2.57 (dd, *J* = 12.8, 9.2 Hz, 1H), 2.27 – 2.09 (m, 1H), 1.32 (d, *J* = 7.0 Hz, 3H). <sup>13</sup>C NMR (101 MHz, CDCl<sub>3</sub>) δ 175.7, 134.8, 131.9, 129.9, 123.8, 52.8, 52.1 (d, *J* = 14.6 Hz), 35.6, 31.9, 15.9. <sup>19</sup>F NMR (376 MHz, CDCl<sub>3</sub>) δ 60.21. **HRMS (ESI):** *m/z* calculated for [M] (C<sub>12</sub>H<sub>13</sub>NO<sub>3</sub>FSCl) from [M+H]<sup>+</sup> is 306.0361, found 306.0356

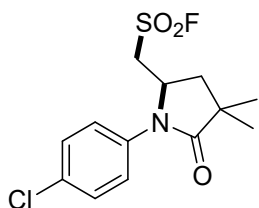

**(1-(4-chlorophenyl)-4,4-dimethyl-5-oxopyrrolidin-2-yl)methanesulfonyl fluoride (2s)**

Compound **2s** was prepared according to **General Procedure**. The residue was purified by flash column chromatography on silica (petroleum ether/ethyl acetate 5:1) to give a white solid (23.7 mg, 74% yield).

<sup>1</sup>H NMR (400 MHz, CDCl<sub>3</sub>) δ 7.49 – 7.31 (m, 2H), 7.29 (dd, *J* = 8.5, 1.5 Hz, 2H), 4.64 (dt, *J* = 12.1, 7.4 Hz, 1H), 3.90 – 3.67 (m, 1H), 3.41 – 3.12 (m, 1H), 2.56 (dd, *J* = 13.3, 7.2 Hz, 1H), 2.02 (dd, *J* = 13.3, 7.1 Hz, 1H), 1.34 (s, 3H), 1.25 (s, 3H). <sup>13</sup>C NMR (101 MHz, CDCl<sub>3</sub>) δ 178.5, 134.6, 132.6, 129.9, 125.2, 54.2 (d, *J* = 15.3 Hz), 51.2, 40.9, 40.2, 25.8, 25.2. <sup>19</sup>F NMR (376 MHz, CDCl<sub>3</sub>) δ 60.73. **HRMS (ESI):** *m/z* calculated for [M] (C<sub>13</sub>H<sub>15</sub>NO<sub>3</sub>FSCl) from [M+H]<sup>+</sup> is 320.0518, found 320.0509

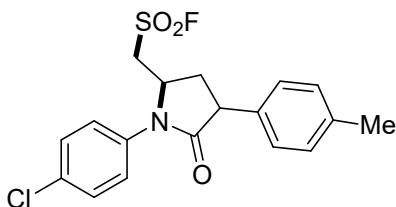

**(1-(4-chlorophenyl)-5-oxo-4-(p-tolyl)pyrrolidin-2-yl)methanesulfonyl fluoride (2t)**

Compound **2t** was prepared according to **General Procedure**. The residue was purified by flash column chromatography on silica (petroleum ether/ethyl acetate 5:1) to give a white solid (27.5 mg, 72% yield, *dr* = 2.8:1).

<sup>1</sup>H NMR (400 MHz, CDCl<sub>3</sub>) δ 7.48 (d, *J* = 9.0 Hz, 2H), 7.42 (d, *J* = 9.0 Hz, 2H), 7.16 (q, *J* = 8.2 Hz, 4H), 4.84 (td, *J* = 7.5, 2.6 Hz, 1H), 3.95 (t, *J* = 9.2 Hz, 1H), 3.71 – 3.61 (m, 1H), 3.59 – 3.48 (m, 1H), 2.83 – 2.57 (m, 2H), 2.34 (s, 3H). <sup>13</sup>C NMR (101 MHz, CDCl<sub>3</sub>) δ 173.6, 137.6, 134.7, 134.4, 132.2, 129.9, 129.8, 127.9, 124.0, 52.9, 52.2 (d, *J* = 15.0 Hz), 46.7, 32.8, 21.1. <sup>19</sup>F NMR (376 MHz, CDCl<sub>3</sub>) δ 60.39. **HRMS (ESI):** *m/z* calculated for [M] (C<sub>18</sub>H<sub>17</sub>NO<sub>3</sub>FSCl) from [M+H]<sup>+</sup> is 382.0674, found 382.0659

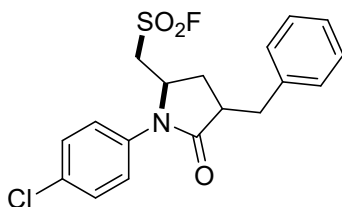

**(4-benzyl-1-(4-chlorophenyl)-5-oxopyrrolidin-2-yl)methanesulfonyl fluoride (2u)**

Compound **2u** was prepared according to **General Procedure**. The residue was purified by flash column chromatography on silica (petroleum ether/ethyl acetate 5:1) to give a white solid (24.4 mg, 64% yield, *dr* = 2:1).

<sup>1</sup>H NMR (400 MHz, CDCl<sub>3</sub>) (*dr* = 1:2) δ 7.49 – 7.12 (m, 27H), 4.64 – 4.42 (m, 1H), 4.42 – 4.20 (m, 2H), 3.54 (ddd, *J* = 14.6, 3.8, 2.3 Hz, 2H), 3.42 – 3.01 (m, 10H), 2.94 (dd, *J* = 13.6, 7.8 Hz, 2H), 2.84 – 2.67 (m, 1H), 2.41 – 2.31 (m, 4H), 2.18 – 2.06 (m, 1H), 2.07 – 1.89 (m, 1H). <sup>13</sup>C NMR (126 MHz, CDCl<sub>3</sub>) δ 174.5, 137.8, 134.5, 132.2, 129.9, 129.2, 128.9, 127.1, 124.2, 53.0, 52.6 (d, *J* = 14.8 Hz),



42.5, 36.7, 29.4.  $^{19}\text{F}$  NMR (376 MHz,  $\text{CDCl}_3$ )  $\delta$  60.28, 59.94. **HRMS (ESI):**  $m/z$  calculated for  $[\text{M}]$  ( $\text{C}_{18}\text{H}_{17}\text{NO}_3\text{FSCI}$ ) from  $[\text{M}+\text{Na}]^+$  is 404.0494, found 404.0476

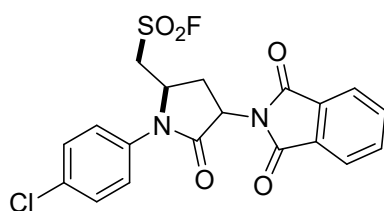

**(1-(4-chlorophenyl)-4-(1,3-dioxoisindolin-2-yl)-5-oxopyrrolidin-2-yl)methanesulfonyl fluoride (2v)**

Compound **2v** was prepared according to **General Procedure**. The residue was purified by flash column chromatography on silica (petroleum ether/ethyl acetate 5:1) to give a white solid (33.2 mg, 76% yield,  $dr = 2:1$ ).

$^1\text{H}$  NMR (400 MHz,  $\text{CDCl}_3$ )  $\delta$  7.86 (dd,  $J = 5.4, 3.0$  Hz, 2H), 7.80 – 7.70 (m, 2H), 7.53 – 7.32 (m, 4H), 5.26 (ddd,  $J = 10.8, 7.1, 3.0$  Hz, 1H), 5.04 – 4.93 (m, 1H), 3.81 – 3.45 (m, 2H), 2.94 (dt,  $J = 14.3, 8.4$  Hz, 1H), 2.86 – 2.66 (m, 1H).  $^{13}\text{C}$  NMR (101 MHz,  $\text{CDCl}_3$ )  $\delta$  168.9, 167.4, 134.6, 134.4, 133.2, 131.7, 130.1, 124.9, 123.8, 53.0, 52.7 (d,  $J = 15.2$  Hz), 48.7, 28.8.  $^{19}\text{F}$  NMR (376 MHz,  $\text{CDCl}_3$ )  $\delta$  60.67. **HRMS (ESI):**  $m/z$  calculated for  $[\text{M}]$  ( $\text{C}_{19}\text{H}_{14}\text{N}_2\text{O}_5\text{FSCI}$ ) from  $[\text{M}+\text{Na}]^+$  is 459.0188, found 459.0183

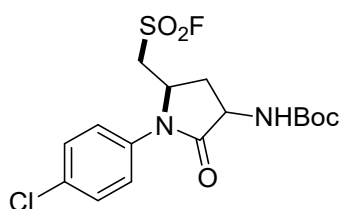

**tert-butyl (1-(4-chlorophenyl)-5-((fluorosulfonyl)methyl)-2-oxopyrrolidin-3-yl)carbamate (2w)**

Compound **2w** was prepared according to **General Procedure**. The residue was purified by flash column chromatography on silica (petroleum ether/ethyl acetate 5:1) to give a white solid (20.3 mg, 50% yield,  $dr = 1.5:1$ ).

$^1\text{H}$  NMR (400 MHz,  $\text{CDCl}_3$ )  $\delta$  7.58 – 7.34 (m, 4H), 5.18 (d,  $J = 5.9$  Hz, 1H), 4.79 (dd,  $J = 11.8, 7.4$  Hz, 1H), 4.45 (d,  $J = 5.8$  Hz, 1H), 3.69 – 3.36 (m, 2H), 2.89 (dd,  $J = 13.6, 8.8$  Hz, 1H), 2.61 – 2.26 (m, 1H), 1.45 (s, 9H).  $^{13}\text{C}$  NMR (126 MHz,  $\text{CDCl}_3$ )  $\delta$  171.4, 155.7, 134.3, 132.6, 130.1, 123.9, 80.8, 52.2, 52.0 (d,  $J = 15.1$  Hz), 51.3, 31.6, 28.4.  $^{19}\text{F}$  NMR (376 MHz,  $\text{CDCl}_3$ )  $\delta$  60.19. **HRMS (ESI):**  $m/z$  calculated for  $[\text{M}]$  ( $\text{C}_{16}\text{H}_{20}\text{N}_2\text{O}_5\text{FSCI}$ ) from  $[\text{M}+\text{Na}]^+$  is 429.0658, found 429.0641

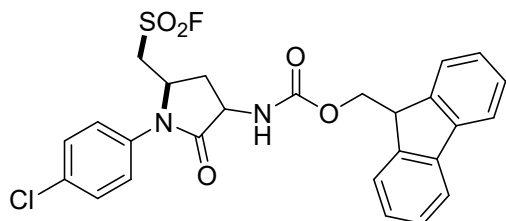

**(9H-fluoren-9-yl)methyl (1-(4-chlorophenyl)-5-((fluorosulfonyl)methyl)-2-oxopyrrolidin-3-yl)carbamate (2x)**

Compound **2x** was prepared according to **General Procedure**. The residue was purified by flash column chromatography on silica (petroleum ether/ethyl acetate 5:1) to give a white solid (23.8 mg, 45% yield,  $dr = 2:1$ ).

$^1\text{H}$  NMR (500 MHz,  $\text{DMSO}-d_6$ ,  $dr = 2:1$ )  $\delta$  7.90 (d,  $J = 7.5$  Hz, 7H), 7.81 (d,  $J = 8.6$  Hz, 2H), 7.72 (t,  $J = 8.2$  Hz, 6H), 7.57 (d,  $J = 8.8$  Hz, 4H), 7.51 (t,  $J = 10.0$  Hz, 6H), 7.42 (t,  $J = 7.1$  Hz, 6H), 7.35 (dt,  $J = 12.2, 7.9$  Hz, 8H), 4.98 (t,  $J = 7.1$  Hz, 2H), 4.76 (d,  $J = 5.2$  Hz, 1H), 4.68 (d,  $J = 10.3$  Hz, 2H), 4.59 – 4.47 (m, 2H), 4.37 (ddd,  $J = 14.3, 9.6, 5.8$  Hz, 7H), 4.25 (t,  $J = 6.5$  Hz, 4H), 4.12 (d,  $J = 14.8$  Hz, 4H), 2.76 (dt,  $J = 12.4, 9.0$  Hz, 1H), 2.40 (dd,  $J = 20.6, 11.5$  Hz, 2H), 2.22 – 1.91 (m, 2H).  $^{13}\text{C}$  NMR (126 MHz,  $\text{DMSO}-d_6$ )  $\delta$  171.5, 155.9, 143.8, 140.7, 135.6, 135.1, 130.8, 129.9, 129.0, 129.0, 127.6, 127.0, 126.6, 125.1, 124.6, 120.1, 65.6, 52.9 (d,  $J = 12.0$  Hz), 51.3, 51.2, 51.0, 50.6, 50.5, 46.6, 30.9, 29.5.  $^{19}\text{F}$  NMR (376 MHz,  $\text{DMSO}-d_6$ )  $\delta$  61.33, 59.85. **HRMS (ESI):**  $m/z$  calculated for  $[\text{M}]$  ( $\text{C}_{26}\text{H}_{22}\text{N}_2\text{O}_5\text{FSCI}$ ) from  $[\text{M}+\text{Na}]^+$  is 551.0814, found 551.0805

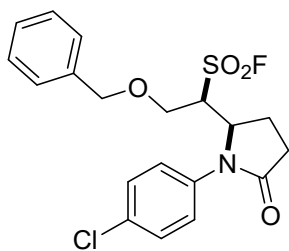

#### 2-(benzyloxy)-1-(1-(4-chlorophenyl)-5-oxopyrrolidin-2-yl)ethanesulfonyl fluoride (2y)

Compound **2y** was prepared according to **General Procedure**. The residue was purified by flash column chromatography on silica (petroleum ether/ethyl acetate 5:1) to give a white solid (23.0 mg, 56% yield, *dr* = 1:1).

<sup>1</sup>H NMR (400 MHz, CDCl<sub>3</sub>) δ 7.42 – 7.33 (m, 5H), 7.31 – 7.20 (m, 4H), 5.01 (t, *J* = 5.1 Hz, 1H), 4.50 (s, 2H), 3.93 – 3.75 (m, 3H), 2.69 – 2.51 (m, 2H), 2.50 – 2.38 (m, 2H). <sup>13</sup>C NMR (101 MHz, CDCl<sub>3</sub>) δ 173.9, 136.1, 134.3, 132.5, 129.9, 128.8, 128.5, 128.1, 125.1, 74.3, 63.2, 62.2 (d, *J* = 10.1 Hz), 57.0, 30.7, 19.6. <sup>19</sup>F NMR (376 MHz, CDCl<sub>3</sub>) δ 58.65. **HRMS (ESI):** *m/z* calculated for [M] (C<sub>19</sub>H<sub>19</sub>NO<sub>4</sub>FSCl) from [M+H]<sup>+</sup> is 412.0780, found 412.0769

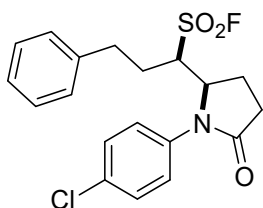

#### 1-(1-(4-chlorophenyl)-5-oxopyrrolidin-2-yl)-3-phenylpropane-1-sulfonyl fluoride (2z)

Compound **2z** was prepared according to **General Procedure**. The residue was purified by flash column chromatography on silica (petroleum ether/ethyl acetate 5:1) to give a white solid (23.0 mg, 58% yield, *dr* = 1.6:1).

<sup>1</sup>H NMR (400 MHz, CDCl<sub>3</sub>) δ 7.38 – 7.21 (m, 5H), 7.17 – 6.97 (m, 4H), 4.52 (ddd, *J* = 12.9, 7.8, 3.1 Hz, 1H), 3.54 (td, *J* = 6.3, 3.0 Hz, 1H), 2.88 – 2.73 (m, 3H), 2.63 – 2.46 (m, 2H), 2.46 – 2.34 (m, 2H), 2.14 – 1.93 (m, 1H). <sup>13</sup>C NMR (101 MHz, CDCl<sub>3</sub>) δ 173.7, 138.2, 134.5, 132.2, 129.6, 129.2, 128.4, 127.3, 125.5, 60.4 (d, *J* = 8.9 Hz), 59.4, 32.5, 30.2, 28.4, 18.5. <sup>19</sup>F NMR (376 MHz, CDCl<sub>3</sub>) δ 60.05. **HRMS (ESI):** *m/z* calculated for [M] (C<sub>19</sub>H<sub>19</sub>NO<sub>3</sub>FSCl) from [M+H]<sup>+</sup> is 396.0831, found 396.0817

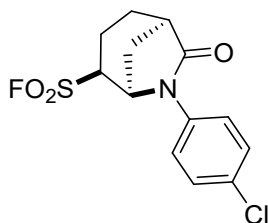

#### 6-(4-chlorophenyl)-7-oxo-6-azabicyclo[3.2.1]octane-4-sulfonyl fluoride (2aa)

Compound **2aa** was prepared according to **General Procedure**. The residue was purified by flash column chromatography on silica (petroleum ether/ethyl acetate 5:1) to give a white solid (22.2 mg, 70% yield, *dr* = 1:1).

<sup>1</sup>H NMR (400 MHz, CDCl<sub>3</sub>) δ 7.59 (d, *J* = 8.8 Hz, 2H), 7.38 (d, *J* = 8.8 Hz, 2H), 4.82 (d, *J* = 2.0 Hz, 1H), 3.85 (d, *J* = 2.2 Hz, 1H), 2.78 (s, 1H), 2.48 – 2.28 (m, 3H), 2.17 – 1.92 (m, 3H). <sup>13</sup>C NMR (101 MHz, CDCl<sub>3</sub>) δ 175.4, 135.3, 131.0, 129.8, 121.4, 56.6, 56.2 (d, *J* = 11.0 Hz), 40.7, 30.4, 21.8, 19.5. <sup>19</sup>F NMR (376 MHz, CDCl<sub>3</sub>) δ 54.83. **HRMS (ESI):** *m/z* calculated for [M] (C<sub>13</sub>H<sub>13</sub>NO<sub>3</sub>FSCl) from [M+H]<sup>+</sup> is 318.0361, found 318.0369

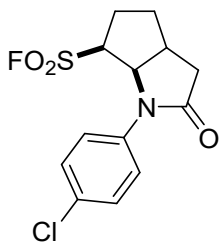

#### 1-(4-chlorophenyl)-2-oxooctahydrocyclopenta[b]pyrrole-6-sulfonyl fluoride (2ab)

Compound **2ab** was prepared according to **General Procedure**. The residue was purified by flash column chromatography on silica (petroleum ether/ethyl acetate 10:1) to give a white solid (17.5 mg, 55% yield, *dr* > 20:1).

<sup>1</sup>H NMR (400 MHz, CDCl<sub>3</sub>) δ 7.41 (s, 4H), 5.12 (d, *J* = 7.4 Hz, 1H), 3.73 (dd, *J* = 4.9, 2.7 Hz, 1H), 3.17 (d, *J* = 3.5 Hz, 1H), 2.92 (dd, *J* = 17.9, 9.8 Hz, 1H), 2.53 – 2.23 (m, 4H), 1.92 – 1.65 (m, 1H). <sup>13</sup>C NMR (101 MHz, CDCl<sub>3</sub>) δ 172.8, 134.5, 132.4, 129.7, 125.0, 66.2, 65.5 (d, *J* = 12.7 Hz), 37.8, 35.2, 32.2, 27.1. <sup>19</sup>F NMR (376 MHz, CDCl<sub>3</sub>) δ 50.00. **HRMS (ESI):** *m/z* calculated for [M] (C<sub>13</sub>H<sub>13</sub>NO<sub>3</sub>FSCl) from [M+H]<sup>+</sup> is 318.0361, found 318.0346

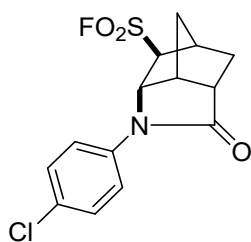

#### 1-(4-chlorophenyl)-2-oxooctahydro-3,5-methanocyclopenta[b]pyrrole-6-sulfonyl fluoride (2ac)

Compound **2ac** was prepared according to **General Procedure**. The residue was purified by flash column chromatography on silica (petroleum ether/ethyl acetate 5:1) to give a white solid (18.5 mg, 56% yield, *dr* > 20:1).

<sup>1</sup>H NMR (400 MHz, CDCl<sub>3</sub>) δ 7.63 (d, *J* = 8.9 Hz, 2H), 7.35 (d, *J* = 8.9 Hz, 2H), 4.72 (d, *J* = 4.5 Hz, 1H), 3.46 (s, 1H), 3.32 (s, 1H), 3.14 (s, 1H), 2.73 (dd, *J* = 11.0, 4.4 Hz, 1H), 2.36 (d, *J* = 11.9 Hz, 1H), 2.30 – 2.14 (m, 1H), 1.79 (dd, *J* = 28.8, 12.8 Hz, 2H). <sup>13</sup>C NMR (126 MHz, CDCl<sub>3</sub>) δ 176.8, 136.3, 130.6, 129.4, 121.2, 69.0 (d, *J* = 11.6 Hz), 63.5, 44.3, 42.6, 40.8, 34.8, 34.6. <sup>19</sup>F NMR (376 MHz, CDCl<sub>3</sub>) δ 54.98. **HRMS (ESI):** *m/z* calculated for [M] (C<sub>14</sub>H<sub>13</sub>NO<sub>3</sub>FSCl) from [M+H]<sup>+</sup> is 330.0361, found 330.0351

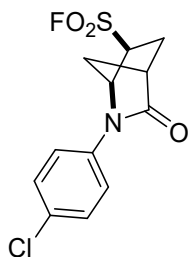

#### 2-(4-chlorophenyl)-3-oxo-2-azabicyclo[2.2.1]heptane-6-sulfonyl fluoride (2ad)

Compound **2ad** was prepared according to **General Procedure**. The residue was purified by flash column chromatography on silica (petroleum ether/ethyl acetate 5:1) to give a white solid (8.5 mg, 28% yield, *dr* = 6:1).

<sup>1</sup>H NMR (400 MHz, CDCl<sub>3</sub>) δ 7.46 – 7.40 (m, 2H), 7.39 – 7.32 (m, 2H), 4.85 (s, 1H), 3.85 (dd, *J* = 7.5, 6.2 Hz, 1H), 3.16 (s, 1H), 2.56 – 2.48 (m, 1H), 2.47 – 2.36 (m, 1H), 2.20 (dt, *J* = 10.8, 6.1 Hz, 2H). <sup>13</sup>C NMR (101 MHz, CDCl<sub>3</sub>) δ 174.2, 135.1, 130.5, 129.7, 119.9, 62.0, 60.7 (d, *J* = 13.7 Hz), 46.0, 36.9, 28.9. <sup>19</sup>F NMR (376 MHz, CDCl<sub>3</sub>) δ 53.41. **HRMS (ESI):** *m/z* calculated for [M] (C<sub>12</sub>H<sub>11</sub>NO<sub>3</sub>FSCl) from [M+H]<sup>+</sup> is 304.0205, found 304.0218

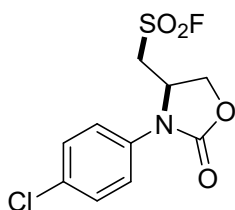

#### (3-(4-chlorophenyl)-2-oxooxazolidin-4-yl)methanesulfonyl fluoride (2ae)

Compound **2ae** was prepared according to **General Procedure**. The residue was purified by flash column chromatography on silica (petroleum ether/ethyl acetate 10:1) to give a white solid (14.1 mg, 48% yield).

<sup>1</sup>H NMR (400 MHz, CDCl<sub>3</sub>) δ 7.51 – 7.35 (m, 4H), 4.95 (dddd, *J* = 10.1, 7.9, 4.0, 2.2 Hz, 1H), 4.74 (dd, *J* = 9.5, 8.2 Hz, 1H), 4.54 (dd, *J* = 9.7, 4.0 Hz, 1H), 3.75 (dt, *J* = 14.8, 2.5 Hz, 1H), 3.62 (ddd, *J* = 14.9, 10.0, 4.9 Hz, 1H). <sup>13</sup>C NMR (101 MHz, CDCl<sub>3</sub>) δ 154.1, 133.5, 132.2, 130.2, 122.7, 66.0, 52.1, 51.5 (d, *J* = 16.2 Hz). <sup>19</sup>F NMR (376 MHz, CDCl<sub>3</sub>) δ 59.98. **HRMS (ESI):** *m/z* calculated for [M] (C<sub>10</sub>H<sub>9</sub>NO<sub>4</sub>FSCl) from [M+H]<sup>+</sup> is 293.9998, found 293.9989

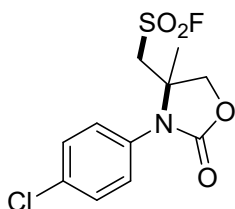

### (3-(4-chlorophenyl)-4-methyl-2-oxooxazolidin-4-yl)methanesulfonyl fluoride (2af)

Compound **2af** was prepared according to **General Procedure**. The residue was purified by flash column chromatography on silica (petroleum ether/ethyl acetate 5:1) to give a white solid (19.1 mg, 62% yield).

$^1\text{H}$  NMR (400 MHz,  $\text{CDCl}_3$ )  $\delta$  7.54 – 7.36 (m, 2H), 7.22 – 7.10 (m, 2H), 4.81 (d,  $J$  = 9.7 Hz, 1H), 4.31 (d,  $J$  = 9.7 Hz, 1H), 3.81 (dd,  $J$  = 14.6, 5.7 Hz, 1H), 3.51 (d,  $J$  = 14.6 Hz, 1H), 1.65 (s, 3H).  $^{13}\text{C}$  NMR (126 MHz,  $\text{CDCl}_3$ )  $\delta$  155.8, 135.7, 131.7, 130.8, 130.4, 72.0, 60.6, 56.6 (d,  $J$  = 14.5 Hz), 24.1 (d,  $J$  = 2.1 Hz).  $^{19}\text{F}$  NMR (376 MHz,  $\text{CDCl}_3$ )  $\delta$  65.40. **HRMS (ESI)**:  $m/z$  calculated for  $[\text{M}]$  ( $\text{C}_{11}\text{H}_{11}\text{NO}_4\text{FSCl}$ ) from  $[\text{M}+\text{Na}]^+$  is 329.9974, found 329.9958

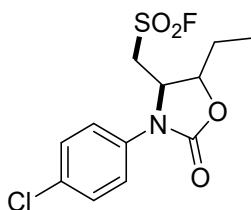

### (3-(4-chlorophenyl)-5-ethyl-2-oxooxazolidin-4-yl)methanesulfonyl fluoride (2ag)

Compound **2ag** was prepared according to **General Procedure**. The residue was purified by flash column chromatography on silica (petroleum ether/ethyl acetate 5:1) to give a white solid (22.5 mg, 70% yield,  $dr$  = 1.6:1).

$^1\text{H}$  NMR (400 MHz,  $\text{CDCl}_3$ )  $\delta$  7.48 – 7.39 (m, 4H), 4.64 – 4.58 (m, 1H), 4.54 (dt,  $J$  = 9.4, 2.6 Hz, 1H), 3.76 – 3.58 (m, 2H), 1.95 – 1.85 (m, 2H), 1.11 (t,  $J$  = 7.4 Hz, 3H).  $^{13}\text{C}$  NMR (101 MHz,  $\text{CDCl}_3$ )  $\delta$  153.5, 133.7, 131.8, 130.1, 122.3, 79.1, 56.4, 51.5 (d,  $J$  = 15.5 Hz), 28.1, 8.7.  $^{19}\text{F}$  NMR (376 MHz,  $\text{CDCl}_3$ )  $\delta$  60.46. **HRMS (ESI)**:  $m/z$  calculated for  $[\text{M}]$  ( $\text{C}_{12}\text{H}_{13}\text{NO}_4\text{FSCl}$ ) from  $[\text{M}+\text{Na}]^+$  is 344.0130, found 344.0115

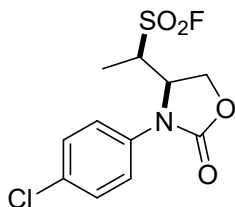

### 1-(3-(4-chlorophenyl)-2-oxooxazolidin-4-yl)ethanesulfonyl fluoride (2ah)

Compound **2ah** was prepared according to **General Procedure**. The residue was purified by flash column chromatography on silica (petroleum ether/ethyl acetate 5:1) to give a white solid (22.1 mg, 72% yield,  $dr$  = 1:1).

$^1\text{H}$  NMR (400 MHz,  $\text{CDCl}_3$ )  $\delta$  7.43 (s, 4H), 5.30 – 5.02 (m, 1H), 4.75 – 4.43 (m, 2H), 3.98 – 3.53 (m, 1H), 1.54 (d,  $J$  = 7.1 Hz, 3H).  $^{13}\text{C}$  NMR (126 MHz,  $\text{CDCl}_3$ )  $\delta$  154.5, 133.3, 132.2, 130.2, 122.9, 61.8, 56.0 (d,  $J$  = 12.4 Hz), 54.6, 7.7.  $^{19}\text{F}$  NMR (376 MHz,  $\text{CDCl}_3$ )  $\delta$  50.46. **HRMS (ESI)**:  $m/z$  calculated for  $[\text{M}]$  ( $\text{C}_{11}\text{H}_{11}\text{NO}_4\text{FSCl}$ ) from  $[\text{M}+\text{Na}]^+$  is 329.9974, found 329.9964

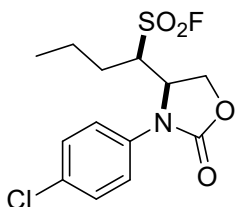

### 1-(3-(4-chlorophenyl)-2-oxooxazolidin-4-yl)butane-1-sulfonyl fluoride (2ai)

Compound **2ai** was prepared according to **General Procedure**. The residue was purified by flash column chromatography on silica (petroleum ether/ethyl acetate 5:1) to give a white solid (21.5 mg, 64% yield,  $dr$  = 1.5:1).

$^1\text{H}$  NMR (400 MHz,  $\text{CDCl}_3$ )  $\delta$  7.52 – 7.27 (m, 4H), 4.93 (dt,  $J$  = 8.2, 5.0 Hz, 1H), 4.71 – 4.53 (m, 2H), 3.60 (td,  $J$  = 6.6, 2.8 Hz, 1H), 2.04 (td,  $J$  = 14.8, 7.0 Hz, 1H), 1.85 – 1.61 (m, 1H), 1.61 – 1.48 (m, 2H), 0.97 (t,  $J$  = 7.3 Hz, 3H).  $^{13}\text{C}$  NMR (101 MHz,  $\text{CDCl}_3$ )  $\delta$  154.8, 133.9, 132.3, 129.9, 124.2, 63.0, 61.4 (d,  $J$  = 10.4 Hz), 56.1, 28.6, 20.2, 13.6.  $^{19}\text{F}$  NMR (376 MHz,  $\text{CDCl}_3$ )  $\delta$  59.03. **HRMS (ESI)**:  $m/z$  calculated for  $[\text{M}]$  ( $\text{C}_{13}\text{H}_{15}\text{NO}_4\text{FSCl}$ ) from  $[\text{M}+\text{Na}]^+$  is 358.0287, found 358.0271

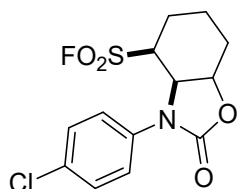

### 3-(4-chlorophenyl)-2-oxooctahydrobenzo[d]oxazole-4-sulfonyl fluoride (2aj)

Compound **2aj** was prepared according to **General Procedure**. The residue was purified by flash column chromatography on silica (petroleum ether/ethyl acetate 5:1) to give a white solid (18.7 mg, 56% yield, *dr* = 6:1).

<sup>1</sup>H NMR (400 MHz, CDCl<sub>3</sub>) δ 7.45 – 7.38 (m, 2H), 7.38 – 7.31 (m, 2H), δ 4.95 (dd, *J* = 11.1, 5.4 Hz, 1H), 4.90 (dd, *J* = 6.4, 3.1 Hz, 1H), 3.77 (d, *J* = 3.5 Hz, 1H), 2.21 – 1.99 (m, 4H), 1.91 – 1.70 (m, 2H). <sup>13</sup>C NMR (101 MHz, CDCl<sub>3</sub>) δ 154.9, 134.0, 132.3, 129.8, 124.1, 72.4, 59.5 (d, *J* = 12.3 Hz), 54.2, 25.6, 21.3, 16.0. <sup>19</sup>F NMR (376 MHz, CDCl<sub>3</sub>) δ 53.08. **HRMS (ESI):** *m/z* calculated for [M] (C<sub>13</sub>H<sub>13</sub>NO<sub>4</sub>FSO<sub>2</sub>) from [M+Na]<sup>+</sup> is 356.0130, found 356.0117

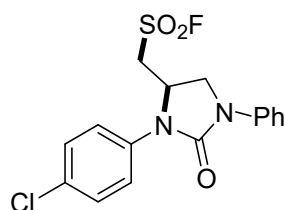

### (3-(4-chlorophenyl)-2-oxo-1-phenylimidazolidin-4-yl)methanesulfonyl fluoride (2ak)

Compound **2ak** was prepared according to **General Procedure**. The residue was purified by flash column chromatography on silica (petroleum ether/ethyl acetate 5:1 to 2:1) to give a white solid (7.7 mg, 21% yield).

<sup>1</sup>H NMR (400 MHz, DMSO-*d*<sub>6</sub>) δ 7.66 – 7.52 (m, 4H), 7.53 – 7.44 (m, 2H), 7.39 (dd, *J* = 10.8, 5.3 Hz, 2H), 7.10 (t, *J* = 7.3 Hz, 1H), 5.21 (d, *J* = 8.2 Hz, 1H), 4.60 – 4.43 (m, 1H), 4.37 – 4.20 (m, 2H), 4.03 (dd, *J* = 9.7, 3.6 Hz, 1H). <sup>13</sup>C NMR (101 MHz, DMSO-*d*<sub>6</sub>) δ 153.6, 139.4, 136.2, 128.8, 128.8, 128.5, 123.4, 123.0, 118.1, 51.2 (d, *J* = 11.8 Hz), 47.9, 46.2. <sup>19</sup>F NMR (376 MHz, DMSO-*d*<sub>6</sub>) δ 61.37. **HRMS (ESI):** *m/z* calculated for [M] (C<sub>16</sub>H<sub>14</sub>N<sub>2</sub>O<sub>3</sub>FSO<sub>2</sub>) from [M+Na]<sup>+</sup> is 391.0290, found 391.0300

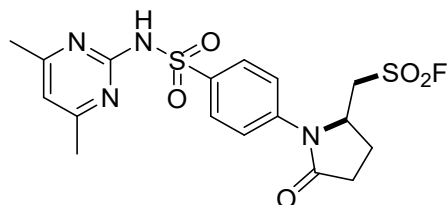

### (1-(4-(N-(4,6-dimethylpyrimidin-2-yl)sulfonyl)phenyl)-5-oxopyrrolidin-2-yl)methanesulfonyl fluoride (2al)

Compound **2al** was prepared according to **General Procedure**. The residue was purified by flash column chromatography on silica (petroleum ether/ethyl acetate 2:1 to 1:1) to give a faint yellow solid (15.5 mg, 35% yield).

<sup>1</sup>H NMR (500 MHz, DMSO-*d*<sub>6</sub>) δ 11.77 (s, 1H), 8.01 (d, *J* = 8.6 Hz, 2H), 7.70 (d, *J* = 8.6 Hz, 2H), 6.76 (s, 1H), 5.02 (t, *J* = 7.6 Hz, 1H), 4.44 – 4.28 (m, 1H), 4.13 (d, *J* = 14.9 Hz, 1H), 2.84 – 2.63 (m, 1H), 2.43 (dd, *J* = 21.7, 10.3 Hz, 2H), 2.25 (s, 6H), 2.16 (t, *J* = 10.4 Hz, 1H). <sup>13</sup>C NMR (126 MHz, DMSO-*d*<sub>6</sub>) δ 173.8, 156.0, 140.2, 131.1, 128.9, 128.3, 126.3, 121.6, 53.8, 51.6 (d, *J* = 11.8 Hz), 30.0, 22.8, 22.7. <sup>19</sup>F NMR (376 MHz, DMSO-*d*<sub>6</sub>) δ 60.54. **HRMS (ESI):** *m/z* calculated for [M] (C<sub>17</sub>H<sub>19</sub>N<sub>4</sub>O<sub>5</sub>FS<sub>2</sub>) from [M+H]<sup>+</sup> is 443.0854, found 443.0870

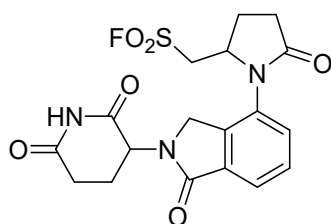

### (1-(2-(2,6-dioxopiperidin-3-yl)-1-oxoisindolin-4-yl)-5-oxopyrrolidin-2-yl)methanesulfonyl fluoride (2am)

Compound **2am** was prepared according to **General Procedure**. The residue was purified by flash column chromatography on silica (petroleum ether/ethyl acetate 1:1) to give a white solid (20.3 mg, 48% yield).

<sup>1</sup>H NMR (400 MHz, DMSO-*d*<sub>6</sub>, *dr* = 1:1) δ 11.01 (s, 1H), 7.72 (dd, *J* = 7.1, 1.6 Hz, 1H), 7.70 – 7.58 (m, 2H), 5.22 – 5.06 (m, 1H), 4.91 – 4.77 (m, 1H), 4.46 – 4.20 (m, 3H), 4.16 – 3.99 (m, 1H), 2.99 – 2.77 (m, 1H), 2.74 – 2.42 (m, 5H), 2.41 – 2.27 (m, 1H), 2.25 – 2.12

(m, 1H), 1.99 (ddd,  $J = 14.5, 7.3, 1.9$  Hz, 1H).  $^{13}\text{C}$  NMR (101 MHz,  $\text{DMSO-}d_6$ )  $\delta$  173.0, 172.8, 170.8, 167.4, 139.1, 133.1, 129.2, 128.7, 126.1, 122.2, 54.9, 52.5 (d,  $J = 11.8$  Hz), 51.3, 46.5, 31.1, 29.3, 23.9, 22.6.  $^{19}\text{F}$  NMR (376 MHz,  $\text{DMSO-}d_6$ )  $\delta$  60.99, 60.31. **HRMS (ESI):**  $m/z$  calculated for  $[\text{M}]$  ( $\text{C}_{18}\text{H}_{18}\text{N}_3\text{O}_6\text{FS}$ ) from  $[\text{M}+\text{H}]^+$  is 424.0973, found 424.0966

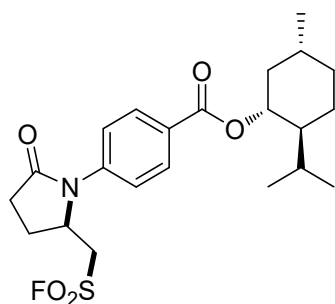

## 2-isopropyl-5-methylcyclohexyl 4-(2-((fluorosulfonyl)methyl)-5-oxopyrrolidin-1-yl)benzoate (2an)

Compound **2an** was prepared according to **General Procedure**. The residue was purified by flash column chromatography on silica (petroleum ether/ethyl acetate 5:1 to 3:1) to give a white solid (25.5 mg, 58% yield,  $dr = 1:1$ ).

$^1\text{H}$  NMR (400 MHz,  $\text{CDCl}_3$ ,  $dr = 1:1$ )  $\delta$  8.11 (d,  $J = 8.4$  Hz, 2H), 7.61 – 7.46 (m, 2H), 5.07 – 4.77 (m, 2H), 3.69 (ddd,  $J = 14.6, 5.8, 3.9$  Hz, 1H), 3.44 (ddd,  $J = 14.6, 9.9, 2.6$  Hz, 1H), 2.86 – 2.55 (m, 3H), 2.40 – 2.23 (m, 1H), 2.15 – 2.05 (m, 1H), 1.93 (tdd,  $J = 13.7, 6.9, 2.7$  Hz, 1H), 1.73 (d,  $J = 11.5$  Hz, 2H), 1.60 – 1.50 (m, 2H), 1.17 – 1.04 (m, 2H), 0.98 – 0.86 (m, 7H), 0.79 (d,  $J = 6.9$  Hz, 3H).  $^{13}\text{C}$  NMR (101 MHz,  $\text{CDCl}_3$ )  $\delta$  173.4, 165.2, 139.8, 131.2, 128.7, 122.1, 75.2, 54.3, 52.8 (d,  $J = 13.9$  Hz), 47.3, 41.0, 34.4, 31.5, 30.4, 26.6, 23.7, 22.1, 20.8, 16.6.  $^{19}\text{F}$  NMR (376 MHz,  $\text{CDCl}_3$ )  $\delta$  60.63, 60.54. **HRMS (ESI):**  $m/z$  calculated for  $[\text{M}]$  ( $\text{C}_{22}\text{H}_{30}\text{NO}_5\text{FS}$ ) from  $[\text{M}+\text{Na}]^+$  is 462.1721, found 462.1716

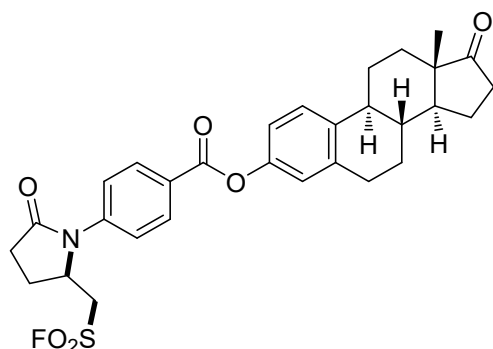

## 13-methyl-17-oxo-7,8,9,11,12,13,14,15,16,17-decahydro-6H-cyclopenta[a]phenanthren-3-yl 4-(2-((fluorosulfonyl)methyl)-5-oxopyrrolidin-1-yl)benzoate (2ao)

Compound **2ao** was prepared according to **General Procedure**. The residue was purified by flash column chromatography on silica (petroleum ether/ethyl acetate 3:1 to 1:1) to give a white solid (25.5 mg, 46% yield).

$^1\text{H}$  NMR (400 MHz,  $\text{CDCl}_3$ )  $\delta$  8.27 (d,  $J = 8.9$  Hz, 2H), 7.64 (d,  $J = 8.8$  Hz, 2H), 7.34 (d,  $J = 8.5$  Hz, 1H), 7.05 – 6.79 (m, 2H), 5.01 – 4.82 (m, 1H), 3.72 (ddd,  $J = 14.6, 3.9, 1.9$  Hz, 1H), 3.48 (ddd,  $J = 14.6, 9.8, 2.5$  Hz, 1H), 3.01 – 2.90 (m, 2H), 2.84 – 2.61 (m, 3H), 2.56 – 2.39 (m, 2H), 2.32 (ddd,  $J = 11.6, 8.9, 3.7$  Hz, 2H), 2.23 – 1.87 (m, 5H), 1.68 – 1.58 (m, 1H), 1.57 – 1.40 (m, 4H), 0.92 (s, 3H).  $^{13}\text{C}$  NMR (126 MHz,  $\text{CDCl}_3$ )  $\delta$  220.9, 173.4, 164.6, 148.8, 140.7, 138.3, 137.7, 131.8, 127.2, 126.6, 121.8, 121.7, 118.9, 54.2, 52.8 (d,  $J = 15.0$  Hz), 50.5, 48.0, 44.3, 38.1, 35.9, 31.6, 30.4, 29.5, 26.4, 25.9, 23.6, 21.7, 13.9.  $^{19}\text{F}$  NMR (376 MHz,  $\text{CDCl}_3$ )  $\delta$  60.60. **HRMS (ESI):**  $m/z$  calculated for  $[\text{M}]$  ( $\text{C}_{30}\text{H}_{32}\text{NO}_6\text{FS}$ ) from  $[\text{M}+\text{H}]^+$  is 554.2007, found 554.2014

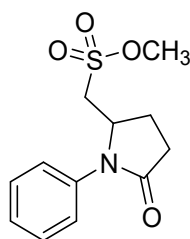

## methyl (5-oxo-1-phenylpyrrolidin-2-yl)methanesulfonate (D1)

$^1\text{H}$  NMR (400 MHz,  $\text{CDCl}_3$ )  $\delta$  7.53 – 7.31 (m, 4H), 7.32 – 7.19 (m, 1H), 4.89 – 4.57 (m, 1H), 3.85 (s, 3H), 3.40 (dd,  $J = 14.3, 2.0$  Hz, 1H), 3.11 (dd,  $J = 14.2, 10.2$  Hz, 1H), 2.76 – 2.50 (m, 3H), 2.35 – 2.13 (m, 1H).  $^{13}\text{C}$  NMR (101 MHz,  $\text{CDCl}_3$ )  $\delta$  173.7, 136.3, 129.6, 126.6, 123.5, 55.6, 55.1, 51.8, 30.6, 24.1. **HRMS (ESI):**  $m/z$  calculated for  $[\text{M}]$  ( $\text{C}_{12}\text{H}_{15}\text{NO}_4\text{S}$ ) from  $[\text{M}+\text{H}]^+$  is 270.0795, found 270.0769

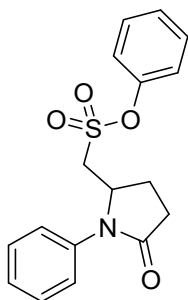

**phenyl (5-oxo-1-phenylpyrrolidin-2-yl)methanesulfonate (D2)**

$^1\text{H}$  NMR (400 MHz,  $\text{CDCl}_3$ )  $\delta$  7.47 – 7.23 (m, 8H), 7.14 (d,  $J$  = 8.0 Hz, 2H), 4.97 – 4.58 (m, 1H), 3.59 (dd,  $J$  = 14.2, 2.1 Hz, 1H), 3.28 (dd,  $J$  = 14.2, 10.3 Hz, 1H), 2.84 – 2.53 (m, 3H), 2.50 – 2.20 (m, 1H).  $^{13}\text{C}$  NMR (101 MHz,  $\text{CDCl}_3$ )  $\delta$  173.7, 148.7, 136.3, 130.2, 129.7, 127.6, 126.8, 123.9, 121.9, 55.4, 52.6, 30.5, 24.1. **HRMS (ESI):**  $m/z$  calculated for  $[\text{M}]$  ( $\text{C}_{17}\text{H}_{17}\text{NO}_4\text{S}$ ) from  $[\text{M}+\text{H}]^+$  is 332.0951, found 332.0949

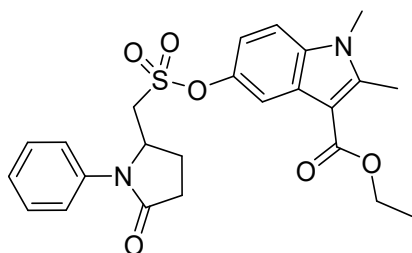

**ethyl 1,2-dimethyl-5-(((5-oxo-1-phenylpyrrolidin-2-yl)methyl)sulfonyl)oxy)-1H-indole-3-carboxylate (D3)**

$^1\text{H}$  NMR (400 MHz,  $\text{CDCl}_3$ )  $\delta$  7.94 (d,  $J$  = 2.4 Hz, 1H), 7.47 – 7.32 (m, 4H), 7.25 – 7.17 (m, 2H), 7.02 (dd,  $J$  = 8.8, 2.4 Hz, 1H), 4.96 – 4.71 (m, 1H), 4.36 (q,  $J$  = 7.1 Hz, 2H), 3.64 (s, 3H), 3.64 – 3.58 (m, 1H), 3.29 (dd,  $J$  = 14.1, 10.3 Hz, 1H), 2.73 (s, 3H), 2.70 – 2.54 (m, 3H), 2.46 – 2.30 (m, 1H), 1.40 (t,  $J$  = 7.1 Hz, 3H).  $^{13}\text{C}$  NMR (101 MHz,  $\text{CDCl}_3$ )  $\delta$  173.7, 165.4, 147.0, 143.9, 136.3, 135.0, 129.5, 127.2, 126.5, 123.6, 115.9, 114.3, 110.0, 104.5, 59.7, 55.3, 52.3, 30.5, 29.9, 24.0, 14.6, 12.0. **HRMS (ESI):**  $m/z$  calculated for  $[\text{M}]$  ( $\text{C}_{24}\text{H}_{26}\text{N}_2\text{O}_6\text{S}$ ) from  $[\text{M}+\text{Na}]^+$  is 493.1404, found 493.1403

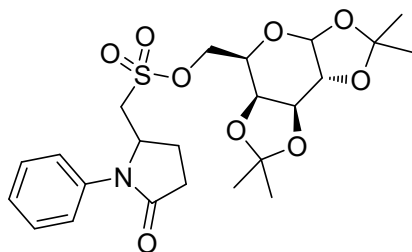

**((5R,5aS,8aS,8bR)-2,2,7,7-tetramethyltetrahydro-3aH-bis([1,3]dioxolo)[4,5-b:4',5'-d]pyran-5-yl)methyl phenylpyrrolidin-2-yl)methanesulfonate (D4)**

**(5-oxo-1-**

$^1\text{H}$  NMR (400 MHz,  $\text{CDCl}_3$ )  $\delta$  7.48 – 7.34 (m, 4H), 7.28 – 7.15 (m, 1H), 5.43 (dd,  $J$  = 51.0, 5.0 Hz, 1H), 4.82 – 4.68 (m, 1H), 4.60 (ddd,  $J$  = 7.8, 3.7, 2.7 Hz, 1H), 4.43 – 4.26 (m, 3H), 4.18 (ddd,  $J$  = 7.8, 3.2, 2.0 Hz, 1H), 4.06 (ddd,  $J$  = 8.4, 4.5, 1.7 Hz, 1H), 3.50 (ddd,  $J$  = 36.2, 14.3, 2.3 Hz, 1H), 3.22 (ddd,  $J$  = 34.0, 14.3, 10.4 Hz, 1H), 2.76 – 2.62 (m, 1H), 2.63 – 2.47 (m, 2H), 2.40 – 2.25 (m, 1H), 1.55 – 1.37 (m, 6H), 1.35 – 1.24 (m, 6H).  $^{13}\text{C}$  NMR (126 MHz,  $\text{CDCl}_3$ )  $\delta$  173.9, 136.4, 129.5, 126.4, 123.6, 110.0, 109.1, 96.2, 70.7, 70.2, 69.7, 66.3, 55.3, 52.9, 30.7, 25.9, 24.9, 24.4, 23.9. **HRMS (ESI):**  $m/z$  calculated for  $[\text{M}]$  ( $\text{C}_{23}\text{H}_{31}\text{NO}_9\text{S}$ ) from  $[\text{M}+\text{H}]^+$  is 520.1612, found 520.1598

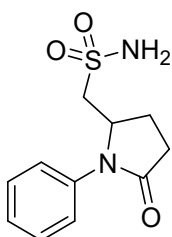

**(5-oxo-1-phenylpyrrolidin-2-yl)methanesulfonamide (D5)**

$^1\text{H}$  NMR (400 MHz,  $\text{DMSO-}d_6$ )  $\delta$  7.51 (dd,  $J$  = 8.5, 0.9 Hz, 2H), 7.42 (t,  $J$  = 7.9 Hz, 2H), 7.22 (t,  $J$  = 7.3 Hz, 1H), 7.09 (s, 2H), 4.83 – 4.47 (m, 1H), 3.31 (dd,  $J$  = 13.9, 10.4 Hz, 1H), 3.07 (dd,  $J$  = 13.9, 1.5 Hz, 1H), 2.76 – 2.59 (m, 1H), 2.47 – 2.32 (m, 2H), 2.28 – 2.12 (m, 1H).  $^{13}\text{C}$  NMR (101 MHz,  $\text{DMSO-}d_6$ )  $\delta$  173.5, 137.2, 129.0, 125.3, 122.9, 56.0, 54.9, 30.2, 23.6. **HRMS (ESI):**  $m/z$  calculated for  $[\text{M}]$  ( $\text{C}_{11}\text{H}_{14}\text{N}_2\text{O}_3\text{S}$ ) from  $[\text{M}+\text{Na}]^+$  is 277.0617, found 277.0601

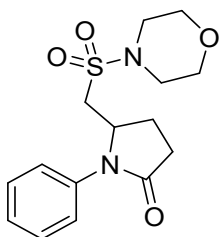**5-((morpholinosulfonyl)methyl)-1-phenylpyrrolidin-2-one (D6)**

$^1\text{H}$  NMR (400 MHz,  $\text{CDCl}_3$ )  $\delta$  7.52 – 7.35 (m, 4H), 7.29 – 7.16 (m, 1H), 4.88 – 4.55 (m, 1H), 3.82 – 3.44 (m, 4H), 3.23 – 3.05 (m, 5H), 2.85 (dd,  $J$  = 13.4, 10.3 Hz, 1H), 2.74 – 2.51 (m, 3H), 2.38 – 2.24 (m, 1H).  $^{13}\text{C}$  NMR (101 MHz,  $\text{CDCl}_3$ )  $\delta$  173.8, 136.6, 129.5, 126.3, 123.1, 66.4, 54.9, 50.1, 45.6, 30.7, 24.4. **HRMS (ESI):**  $m/z$  calculated for  $[\text{M}]$  ( $\text{C}_{15}\text{H}_{20}\text{N}_2\text{O}_4\text{S}$ ) from  $[\text{M}+\text{H}]^+$  is 325.1217, found 325.1216

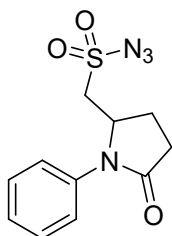**(5-oxo-1-phenylpyrrolidin-2-yl)methanesulfonyl azide (D7)**

$^1\text{H}$  NMR (400 MHz,  $\text{CDCl}_3$ )  $\delta$  7.50 – 7.35 (m, 4H), 7.33 – 7.22 (m, 1H), 4.88 – 4.62 (m, 1H), 3.60 (d,  $J$  = 14.2 Hz, 1H), 3.44 – 3.26 (m, 1H), 2.80 – 2.51 (m, 3H), 2.43 – 2.19 (m, 1H).  $^{13}\text{C}$  NMR (101 MHz,  $\text{CDCl}_3$ )  $\delta$  173.6, 136.1, 129.8, 126.9, 123.6, 57.6, 54.9, 30.5, 24.1. **HRMS (ESI):**  $m/z$  calculated for  $[\text{M}]$  ( $\text{C}_{11}\text{H}_{12}\text{N}_4\text{O}_3\text{S}$ ) from  $[\text{M}+\text{H}]^+$  is 281.0703, found 281.0698

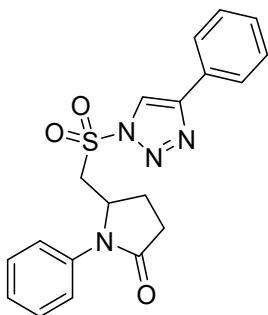**1-phenyl-5-(((4-phenyl-1H-1,2,3-triazol-1-yl)sulfonyl)methyl)pyrrolidin-2-one (D8)**

$^1\text{H}$  NMR (400 MHz,  $\text{CDCl}_3$ )  $\delta$  8.25 (s, 1H), 7.84 (dd,  $J$  = 8.1, 1.2 Hz, 2H), 7.53 – 7.39 (m, 3H), 7.34 (t,  $J$  = 7.8 Hz, 2H), 7.29 – 7.23 (m, 2H), 7.20 (t,  $J$  = 7.3 Hz, 1H), 4.82 (ddd,  $J$  = 7.4, 6.0, 3.5 Hz, 1H), 3.84 (d,  $J$  = 2.0 Hz, 1H), 3.68 (dd,  $J$  = 14.6, 9.9 Hz, 1H), 2.77 – 2.45 (m, 3H), 2.15 (tt,  $J$  = 12.8, 4.7 Hz, 1H).  $^{13}\text{C}$  NMR (101 MHz,  $\text{CDCl}_3$ )  $\delta$  173.3, 147.9, 135.7, 129.7, 129.6, 129.2, 128.3, 126.9, 126.2, 123.4, 119.3, 57.6, 54.5, 30.3, 24.0. **HRMS (ESI):**  $m/z$  calculated for  $[\text{M}]$  ( $\text{C}_{19}\text{H}_{18}\text{N}_4\text{O}_3\text{S}$ ) from  $[\text{M}+\text{H}]^+$  is 383.1172, found 383.1184



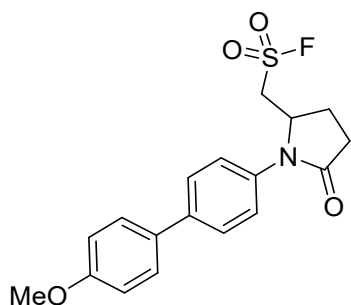

**(1-(4'-methoxy-[1,1'-biphenyl]-4-yl)-5-oxopyrrolidin-2-yl)methanesulfonyl fluoride (D9)**

$^1\text{H}$  NMR (400 MHz,  $\text{CDCl}_3$ )  $\delta$  7.62 (d,  $J$  = 8.6 Hz, 2H), 7.51 (d,  $J$  = 8.7 Hz, 2H), 7.43 (d,  $J$  = 8.6 Hz, 2H), 6.99 (d,  $J$  = 8.7 Hz, 2H), 4.86 – 4.72 (m, 1H), 3.86 (s, 3H), 3.75 (ddd,  $J$  = 14.6, 4.4, 2.2 Hz, 1H), 3.43 (ddd,  $J$  = 14.5, 10.0, 2.7 Hz, 1H), 2.81 – 2.56 (m, 3H), 2.40 – 2.16 (m, 1H).  $^{13}\text{C}$  NMR (101 MHz,  $\text{CDCl}_3$ )  $\delta$  173.4, 159.5, 139.7, 134.3, 132.5, 128.2, 128.0, 124.0, 114.4, 55.5, 54.9, 53.3 (d,  $J$  = 14.6 Hz), 30.3, 23.9.  $^{19}\text{F}$  NMR (376 MHz,  $\text{CDCl}_3$ )  $\delta$  60.62. **HRMS (ESI):**  $m/z$  calculated for  $[\text{M}]$  ( $\text{C}_{18}\text{H}_{18}\text{NO}_4\text{FS}$ ) from  $[\text{M}+\text{H}]^+$  is 364.1013, found 364.0999

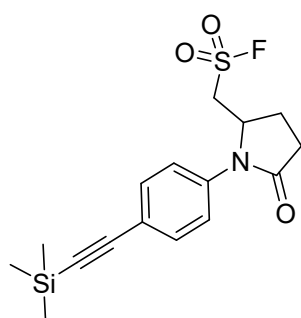

**(5-oxo-1-(4-((trimethylsilyl)ethynyl)phenyl)pyrrolidin-2-yl)methanesulfonyl fluoride (D10)**

$^1\text{H}$  NMR (400 MHz,  $\text{CDCl}_3$ )  $\delta$  7.53 (d,  $J$  = 8.7 Hz, 2H), 7.39 (d,  $J$  = 8.6 Hz, 2H), 4.87 – 4.72 (m, 1H), 3.71 – 3.60 (m, 1H), 3.44 – 3.32 (m, 1H), 2.80 – 2.56 (m, 3H), 2.33 – 2.18 (m, 1H), 0.25 (s, 9H).  $^{13}\text{C}$  NMR (126 MHz,  $\text{CDCl}_3$ )  $\delta$  173.2, 135.9, 133.4, 122.6, 121.6, 104.0, 95.5, 54.5, 52.9 (d,  $J$  = 15.0 Hz), 30.4, 23.7, 0.04.  $^{19}\text{F}$  NMR (376 MHz,  $\text{CDCl}_3$ )  $\delta$  60.54. **HRMS (ESI):**  $m/z$  calculated for  $[\text{M}]$  ( $\text{C}_{16}\text{H}_{20}\text{NO}_3\text{FSi}$ ) from  $[\text{M}+\text{H}]^+$  is 354.0990, found 354.0985

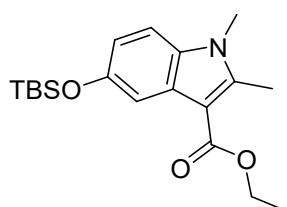

**ethyl 5-((tert-butyldimethylsilyl)oxy)-1,2-dimethyl-1H-indole-3-carboxylate (S5)**

$^1\text{H}$  NMR (500 MHz,  $\text{CDCl}_3$ )  $\delta$  7.60 (d,  $J$  = 2.0 Hz, 1H), 7.11 (d,  $J$  = 8.7 Hz, 1H), 6.78 (dd,  $J$  = 8.7, 2.1 Hz, 1H), 4.38 (q,  $J$  = 7.1 Hz, 2H), 3.63 (s, 3H), 2.73 (s, 3H), 1.45 (t,  $J$  = 7.1 Hz, 3H), 1.02 (s, 9H), 0.23 (s, 6H).  $^{13}\text{C}$  NMR (126 MHz,  $\text{CDCl}_3$ )  $\delta$  166.3, 151.1, 145.7, 132.1, 127.4, 115.8, 111.5, 109.4, 103.5, 59.3, 29.7, 25.9, 18.4, 14.7, 12.0, -4.2. **HRMS (ESI):**  $m/z$  calculated for  $[\text{M}]$  ( $\text{C}_{19}\text{H}_{29}\text{NO}_3\text{Si}$ ) from  $[\text{M}+\text{H}]^+$  is 348.1989, found 348.1985

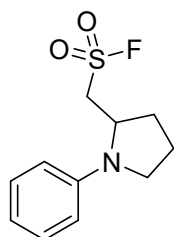

**(1-phenylpyrrolidin-2-yl)methanesulfonyl fluoride (D11)**

$^1\text{H}$  NMR (400 MHz,  $\text{CDCl}_3$ )  $\delta$  7.28 (dd,  $J$  = 12.0, 10.9 Hz, 2H), 6.78 (t,  $J$  = 7.3 Hz, 1H), 6.61 (d,  $J$  = 8.0 Hz, 2H), 4.46 – 4.16 (m, 1H), 3.70 (dd,  $J$  = 14.6, 2.8 Hz, 1H), 3.47 (td,  $J$  = 8.6, 2.1 Hz, 1H), 3.33 – 3.11 (m, 2H), 2.32 – 1.96 (m, 4H).  $^{13}\text{C}$  NMR (101 MHz,  $\text{CDCl}_3$ )  $\delta$  145.3, 129.9, 117.5, 112.2, 53.8, 52.3 (d,  $J$  = 10.1 Hz), 47.9, 30.7, 22.9.  $^{19}\text{F}$  NMR (376 MHz,  $\text{CDCl}_3$ )  $\delta$  58.62. **HRMS (ESI):**  $m/z$  calculated for  $[\text{M}]$  ( $\text{C}_{25}\text{H}_{22}\text{NO}_3\text{SCl}$ ) from  $[\text{M}+\text{H}]^+$  is 452.1082, found 452.1088

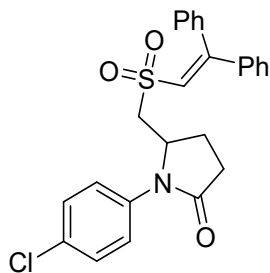

**1-(4-chlorophenyl)-5-(((2,2-diphenylvinyl)sulfonyl)methyl)pyrrolidin-2-one (D14)**

$^1\text{H}$  NMR (400 MHz,  $\text{CDCl}_3$ )  $\delta$  7.46 – 7.37 (m, 2H), 7.38 – 7.28 (m, 8H), 7.22 (dd,  $J$  = 11.0, 4.0 Hz, 4H), 6.78 (s, 1H), 4.69 (ddd,  $J$  = 13.0, 6.2, 3.8 Hz, 1H), 2.96 (dd,  $J$  = 13.4, 1.7 Hz, 1H), 2.77 (dd,  $J$  = 13.4, 10.3 Hz, 1H), 2.57 – 2.43 (m, 3H), 2.19 (dt,  $J$  = 10.6, 9.0 Hz, 1H).  $^{13}\text{C}$  NMR (101 MHz,  $\text{CDCl}_3$ )  $\delta$  173.8, 157.0, 138.7, 135.2, 135.1, 131.4, 131.0, 129.8, 129.8, 129.6, 128.9, 128.4, 128.3, 126.9, 124.0, 56.0, 53.8, 30.6, 24.6. **HRMS (ESI):**  $m/z$  calculated for  $[\text{M}]$  ( $\text{C}_{25}\text{H}_{22}\text{NO}_3\text{SCl}$ ) from  $[\text{M}+\text{H}]^+$  is 452.1082, found 452.1088

## 11. References

- [1] D. C. Miller, G. J. Choi, H. S. Orbe, R. R. Knowles, *J. Am. Chem. Soc.* **2015**, *137*, 13492;
- [2] J.-B. Peng, F.-P. Wu, D. Li, H.-Q. Geng, X. Qi, J. Ying, X.-F. Wu, *ACS Catal.* **2019**, *9*, 2977;
- [3] S. Zheng, S.-Q. Zhang, B. Saeednia, J. Zhou, J. M. Anna, X. Hong, G. A. Molander, *Chem. Sci.* **2020**, *11*, 4131;
- [4] M. L. O'Duill, R. Matsuura, Y. Wang, J. L. Turnbull, J. A. Gurak, Jr., D.-W. Gao, G. Lu, P. Liu, K. M. Engle, *J. Am. Chem. Soc.* **2017**, *139*, 15576;
- [5] Y. Liu, H. Wu, Y. Guo, J. C. Xiao, Q. Y. Chen, C. Liu, *Angew. Chem. Int. Ed.* **2017**, *56*, 15432; *Angew. Chem.* **2017**, *129*, 15634;
- [6] R. Xu, T. Xu, M. Yang, T. Cao, S. Liao, *Nat. Commun.* **2019**, *10*, 3752;
- [7] J. Chen, B.-q. Huang, Z.-q. Wang, X.-j. Zhang, M. Yan, *Org. Lett.* **2019**, *21*, 9742.
- [8] C. Liu, C. Yang, S. Hwang, S. L. Ferraro, J. P. Flynn, J. Niu, *Angew. Chem. Int. Ed.* **2020**, *59*, 18435. *Angew. Chem.* **2020**, *132*, 18593;
- [9] X. Chen, J. Ren, H. Xie, W. Sun, M. Sun and B. Wu, *Org. Chem. Front.*, **2018**, *5*, 184;
- [10] O. Fadeyi, M. D. Parikh, M. Z. Chen, R. E. Kyne, Jr., A. P. Taylor, I. O'Doherty, S. E. Kaiser, S. Barbas, S. Niessen, M. Shi, S. L. Weinrich, J. C. Kath, L. H. Jones, R. P. Robinson, *Chembiochem* **2016**, *17*, 1925;
- [11] C. J. Collins, M. Lanz, B. Singaram, *Tetrahedron Lett.* **1999**, *40*, 3673;
- [12] (a) D. F. Chen, J. C. K. Chu, T. Rovis, *J. Am. Chem. Soc.* **2017**, *139*, 14897; (b) J. C. Chu, T. Rovis, *Nature* **2016**, *539*, 272;
- [13] Z. Li, L. Song, C. Li, *J. Am. Chem. Soc.* **2013**, *135*, 4640;
- [14] F. Foschi, C. Loro, R. Sala, J. Oble, L. L. Presti, E. M. Beccalli, G. Poli, G. Broggin, *Org. Lett.* **2020**, *22*, 1402;

## 12. NMR Spectra of Compounds 1d, 1e, 1l-1r, 1t-1ad, 1af-1ao, 2a-2ao, D1-D14, S5

<sup>1</sup>H-NMR (400 MHz, CDCl<sub>3</sub>)

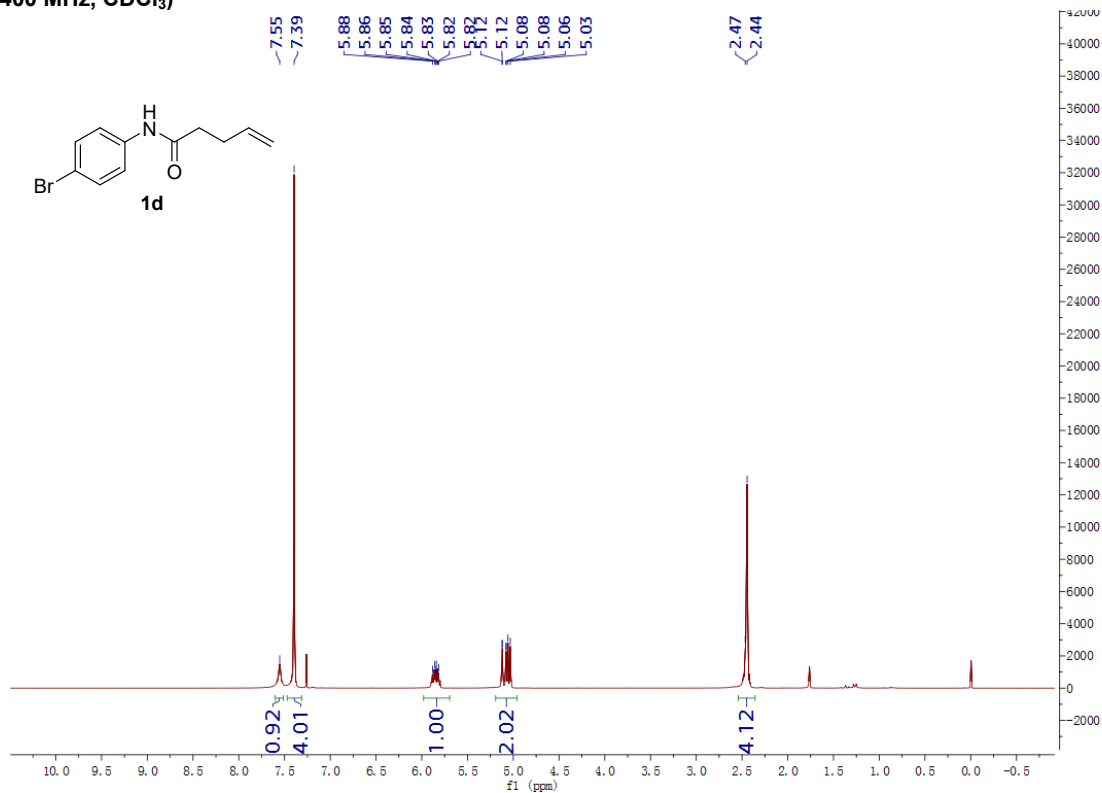

<sup>13</sup>C-NMR (101 MHz, CDCl<sub>3</sub>)

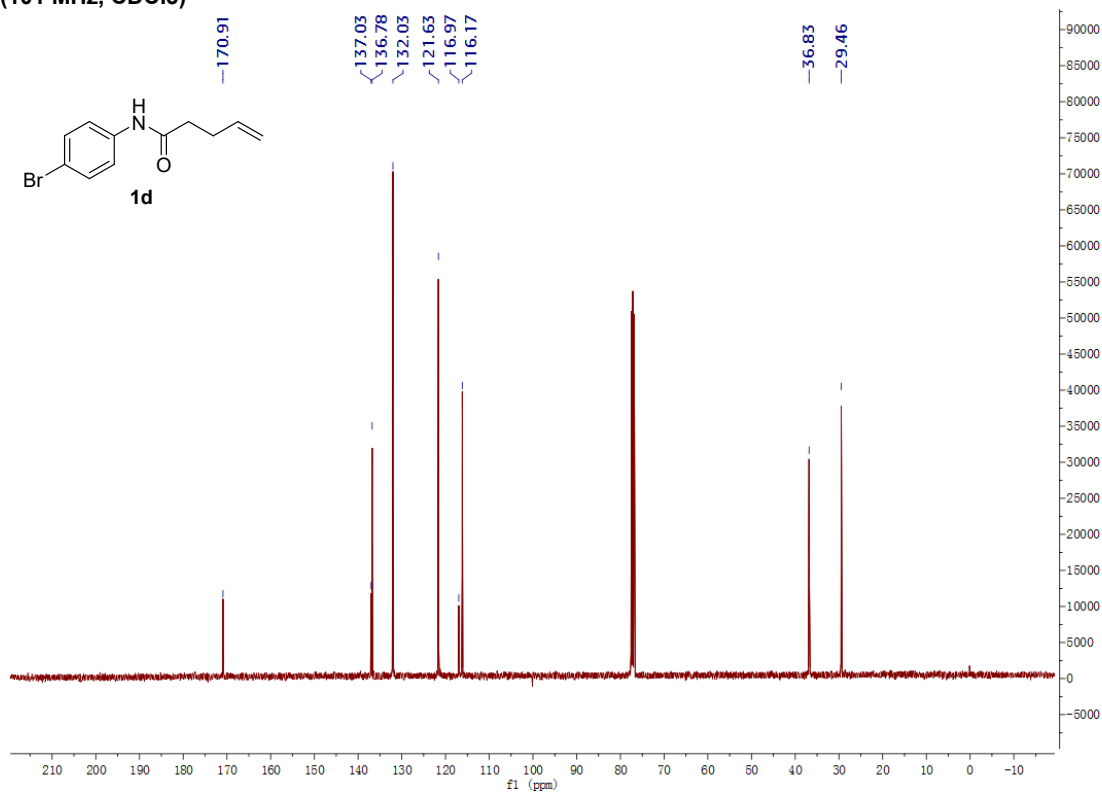

**<sup>1</sup>H-NMR (400 MHz, CDCl<sub>3</sub>)**

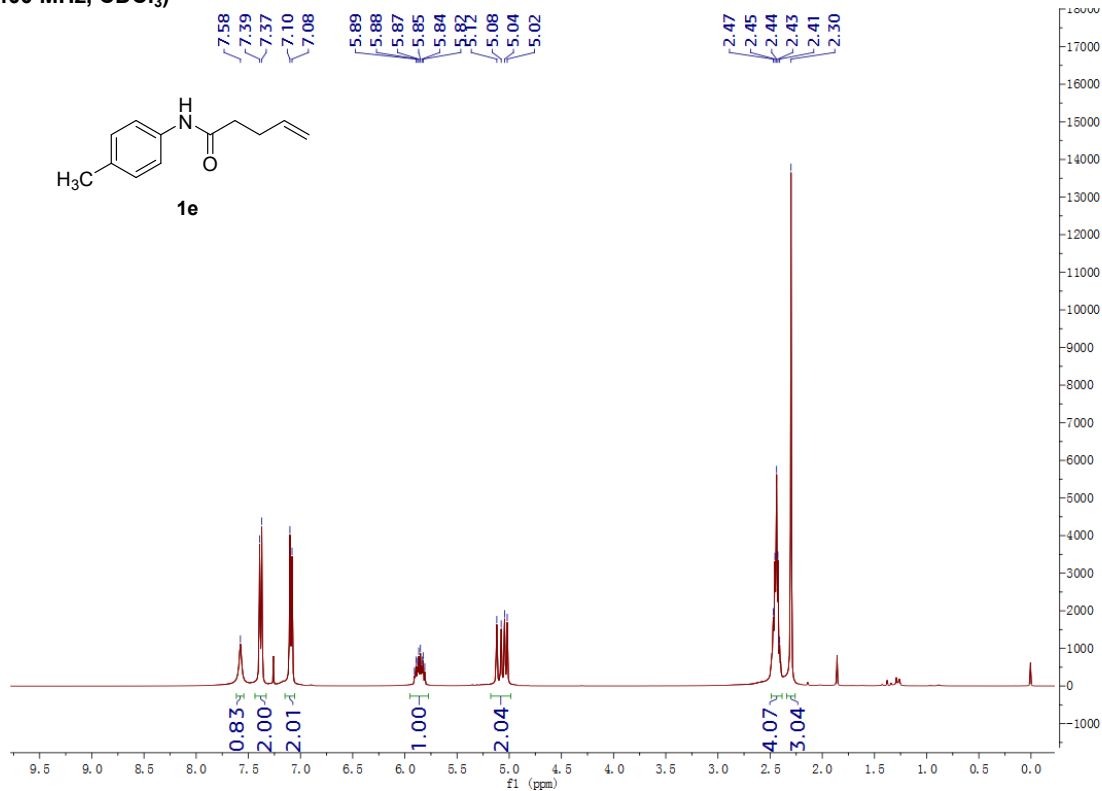

**<sup>13</sup>C-NMR (101 MHz, CDCl<sub>3</sub>)**

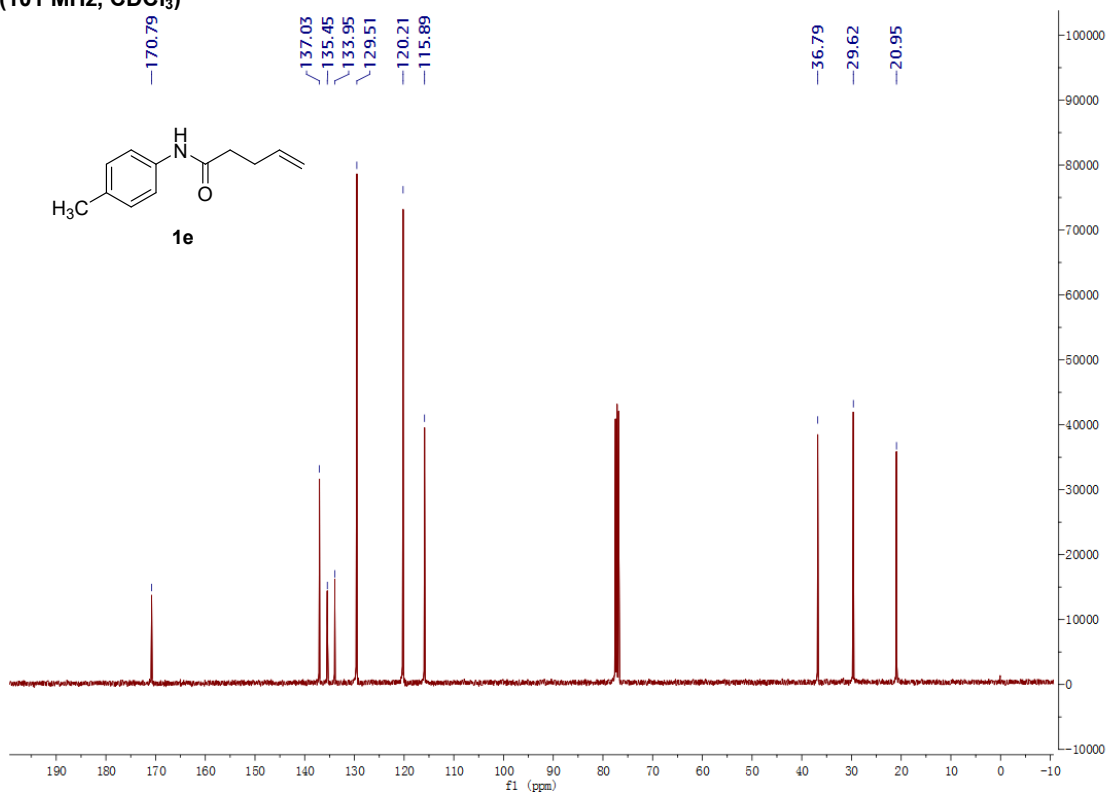

**<sup>1</sup>H-NMR (400 MHz, CDCl<sub>3</sub>)**

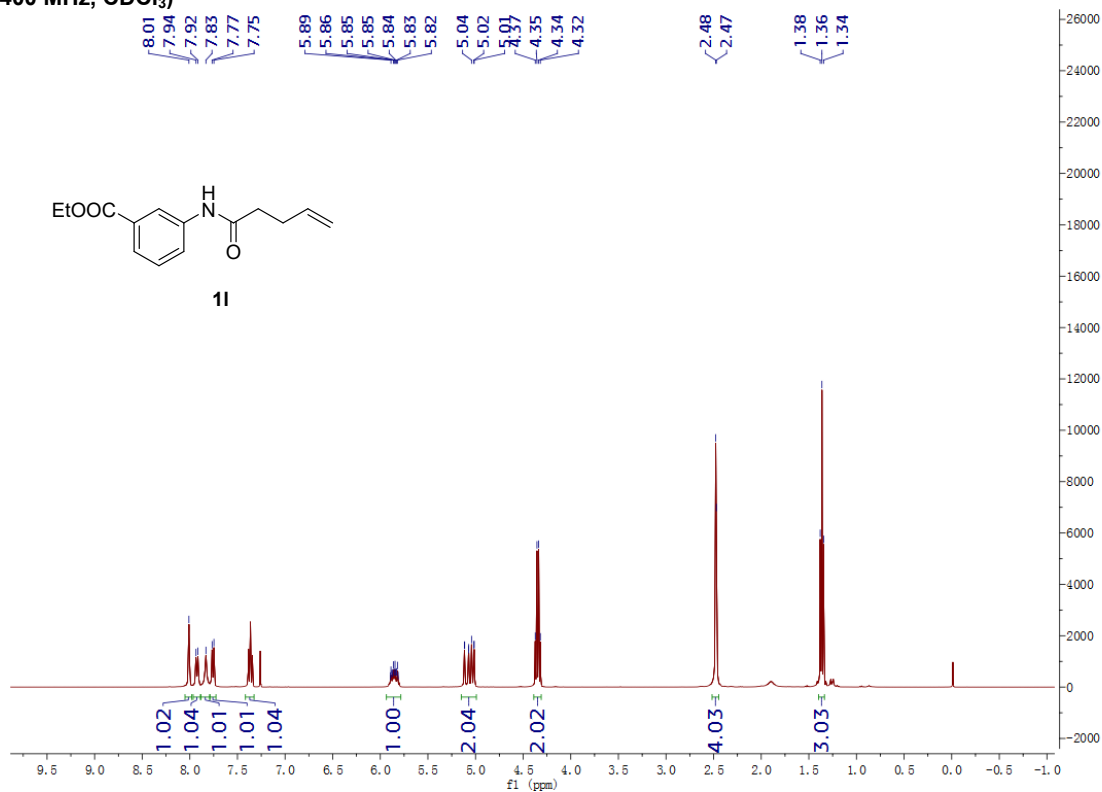

**<sup>13</sup>C-NMR (101 MHz, CDCl<sub>3</sub>)**

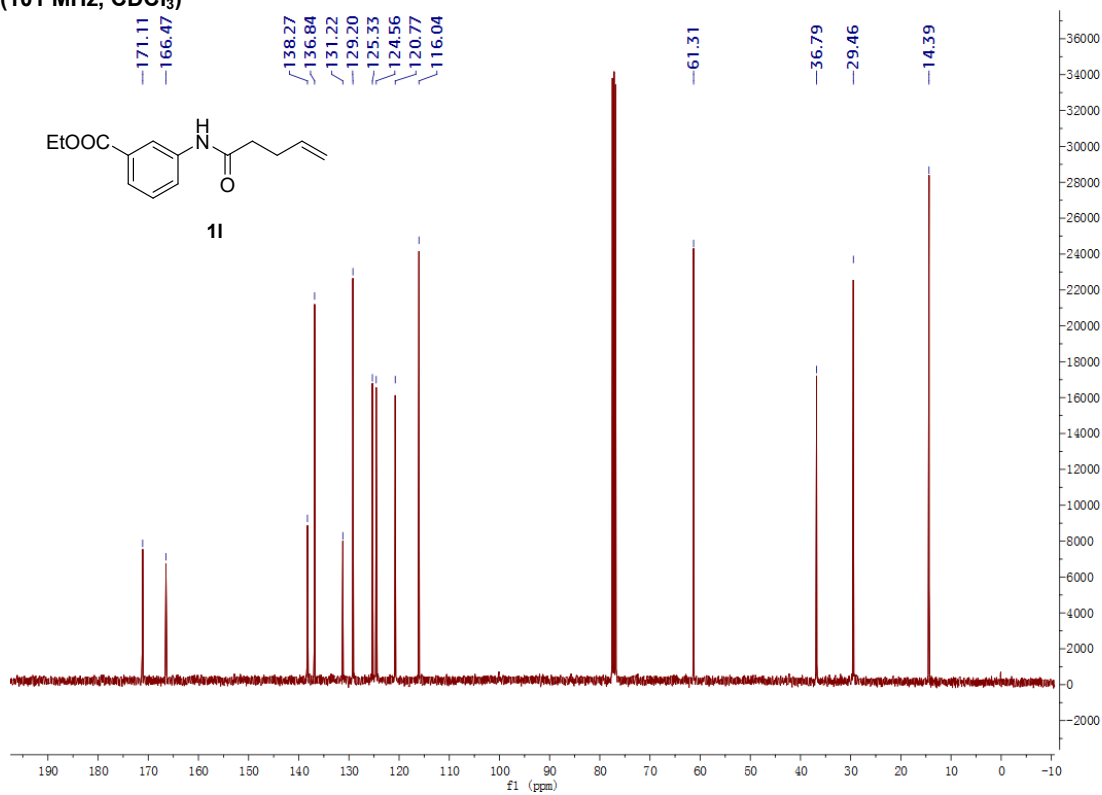

**<sup>1</sup>H-NMR (400 MHz, CDCl<sub>3</sub>)**

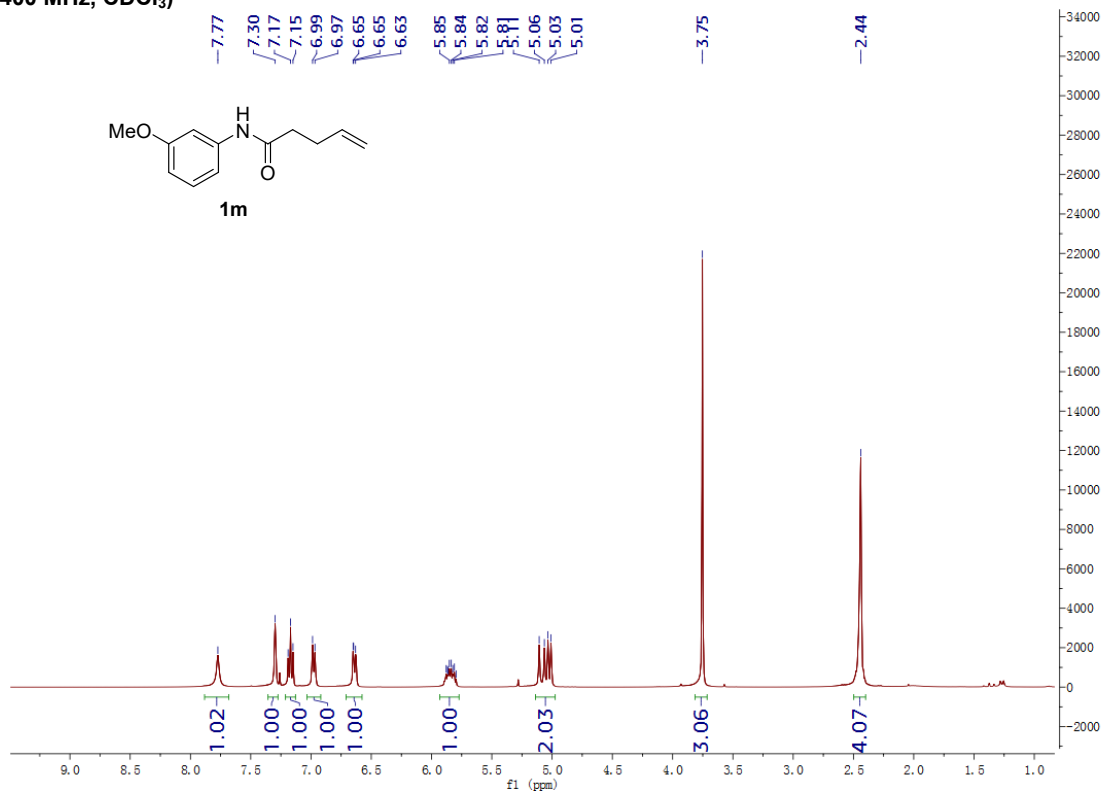

**<sup>13</sup>C-NMR (101 MHz, CDCl<sub>3</sub>)**

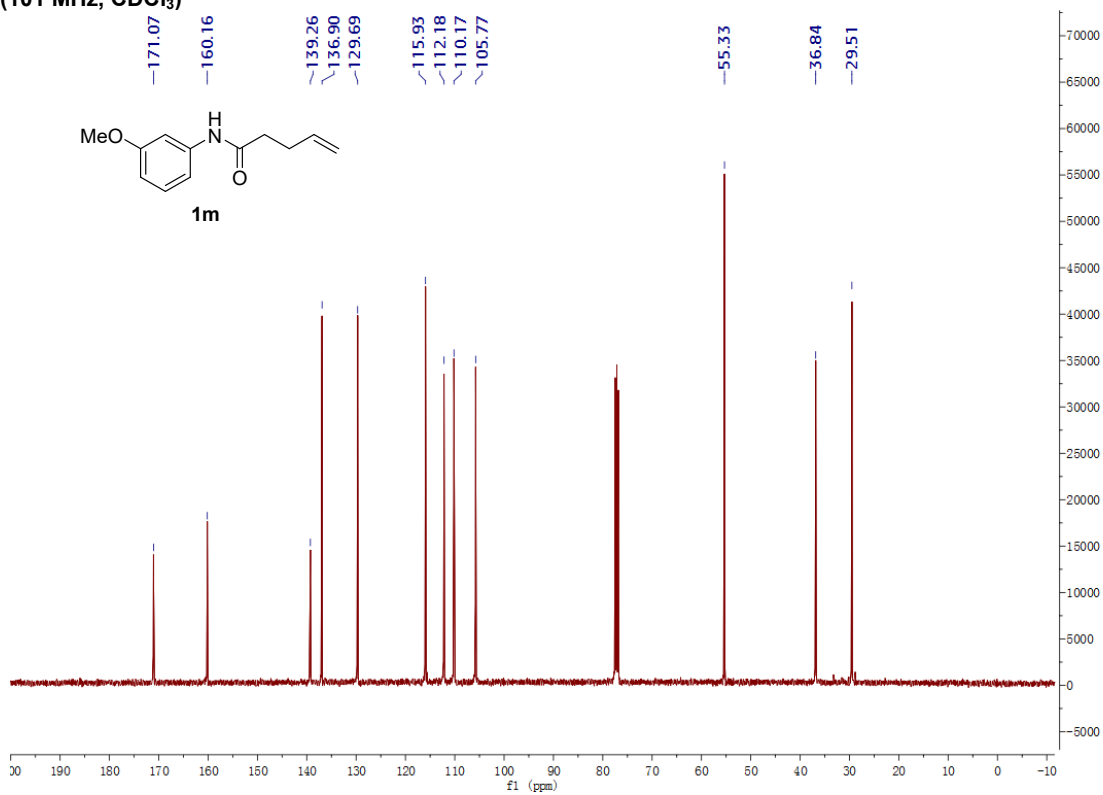

**<sup>1</sup>H-NMR (400 MHz, CDCl<sub>3</sub>)**

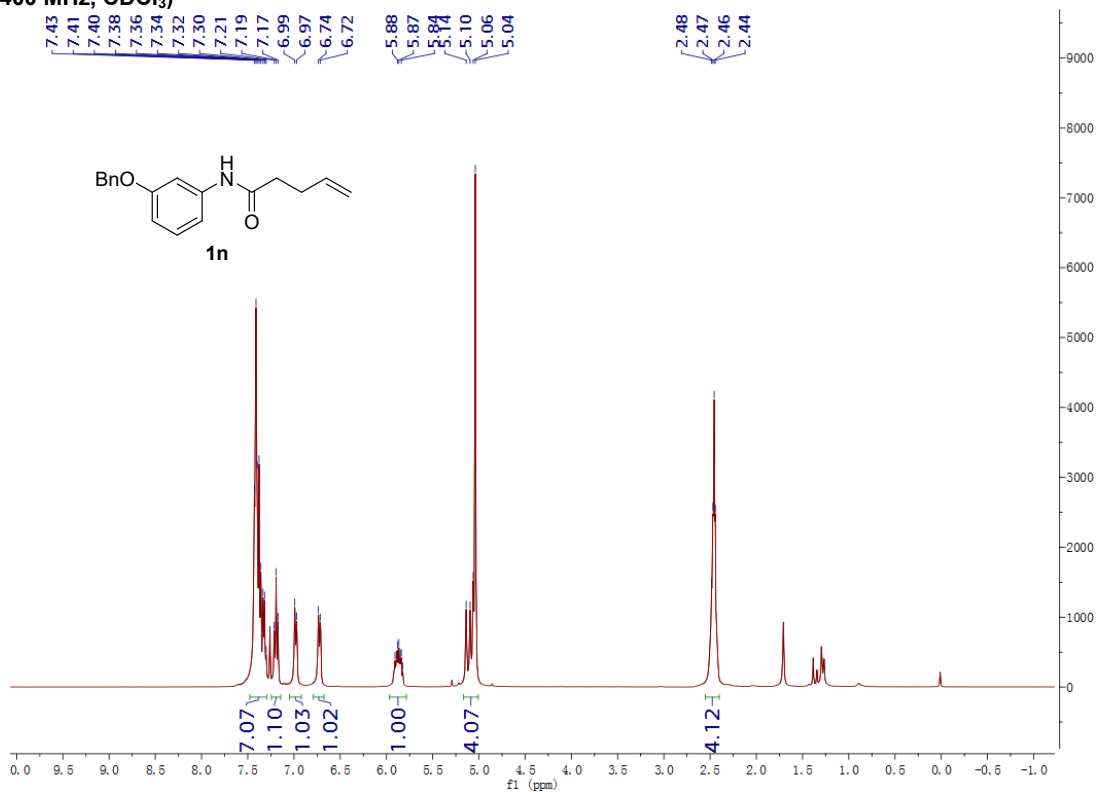

**<sup>13</sup>C-NMR (101 MHz, CDCl<sub>3</sub>)**

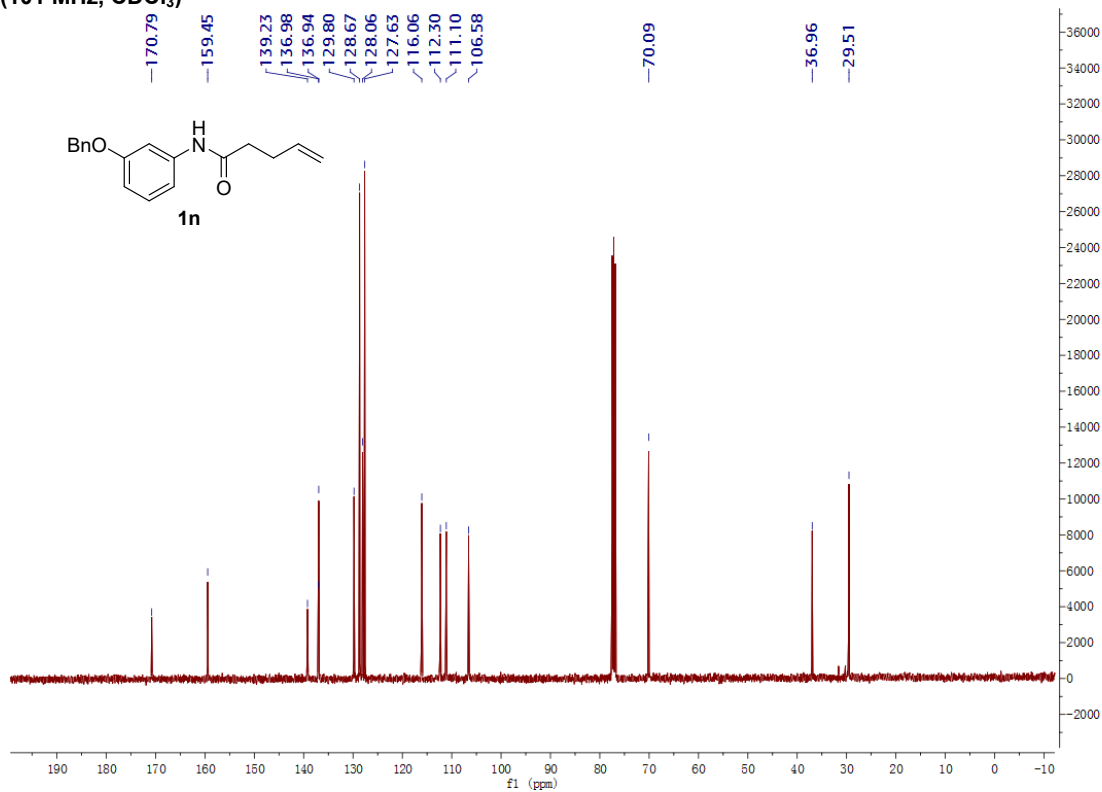



**<sup>1</sup>H-NMR (400 MHz, CDCl<sub>3</sub>)**

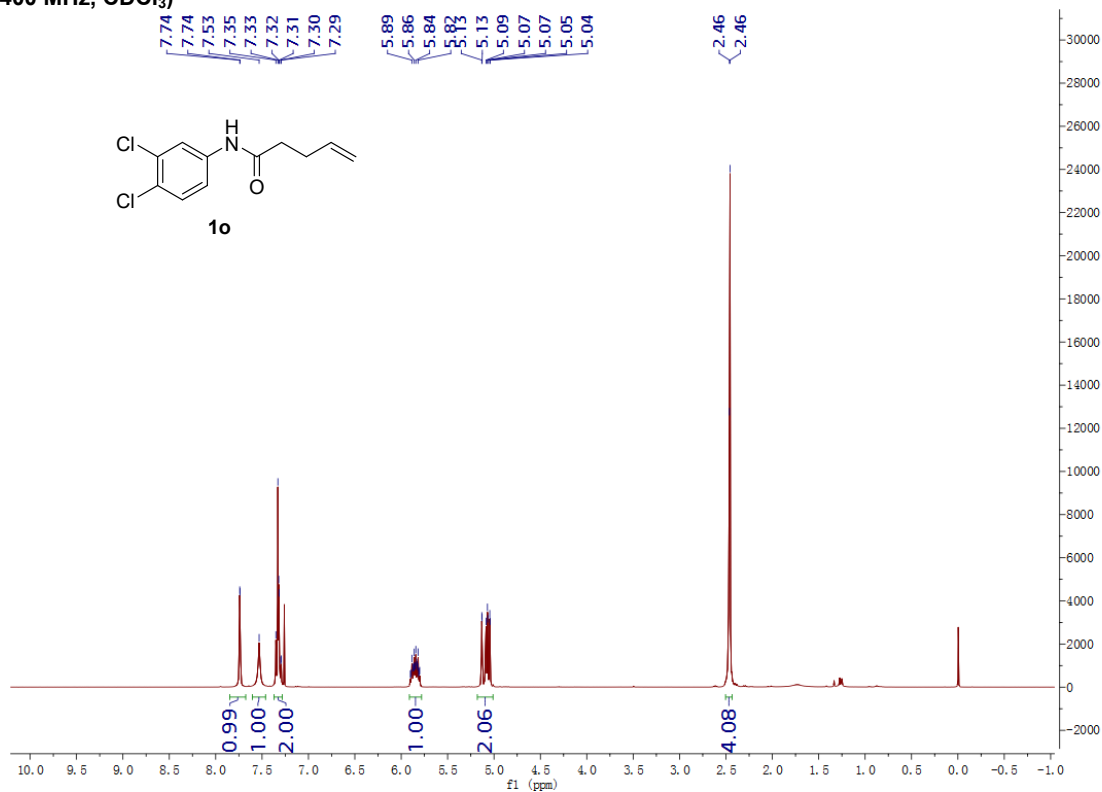

**<sup>13</sup>C-NMR (101 MHz, CDCl<sub>3</sub>)**

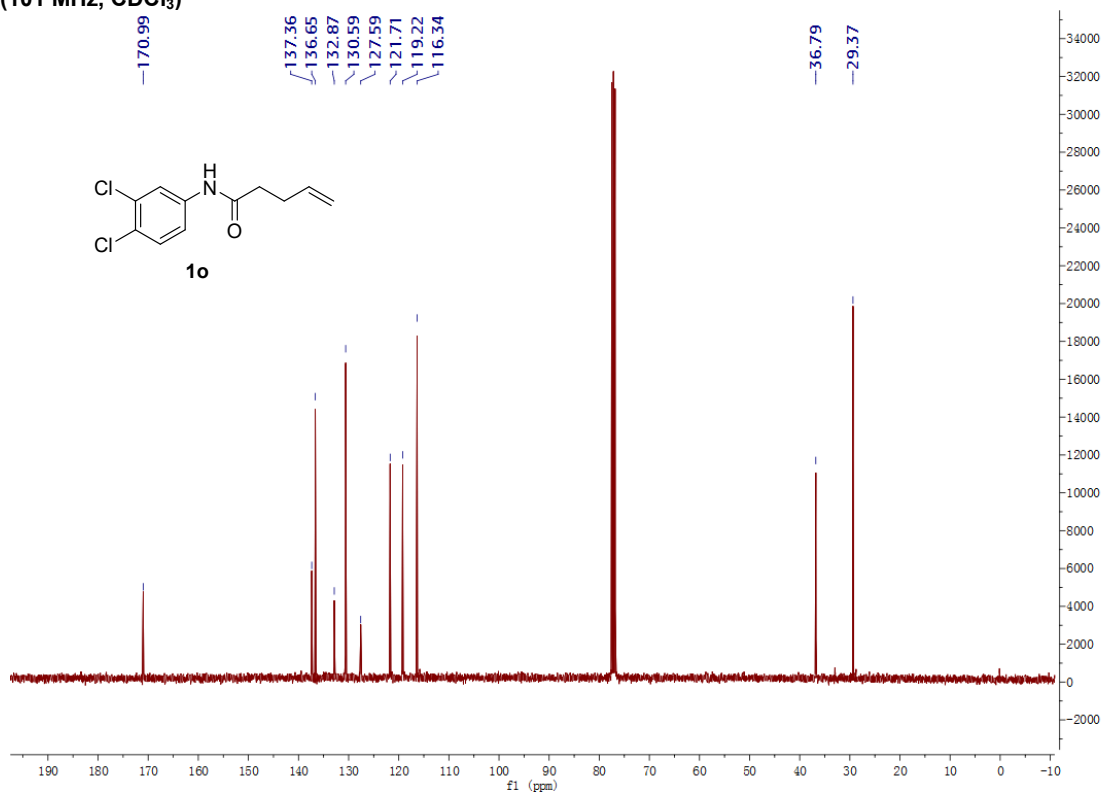

**<sup>1</sup>H-NMR (400 MHz, CDCl<sub>3</sub>)**

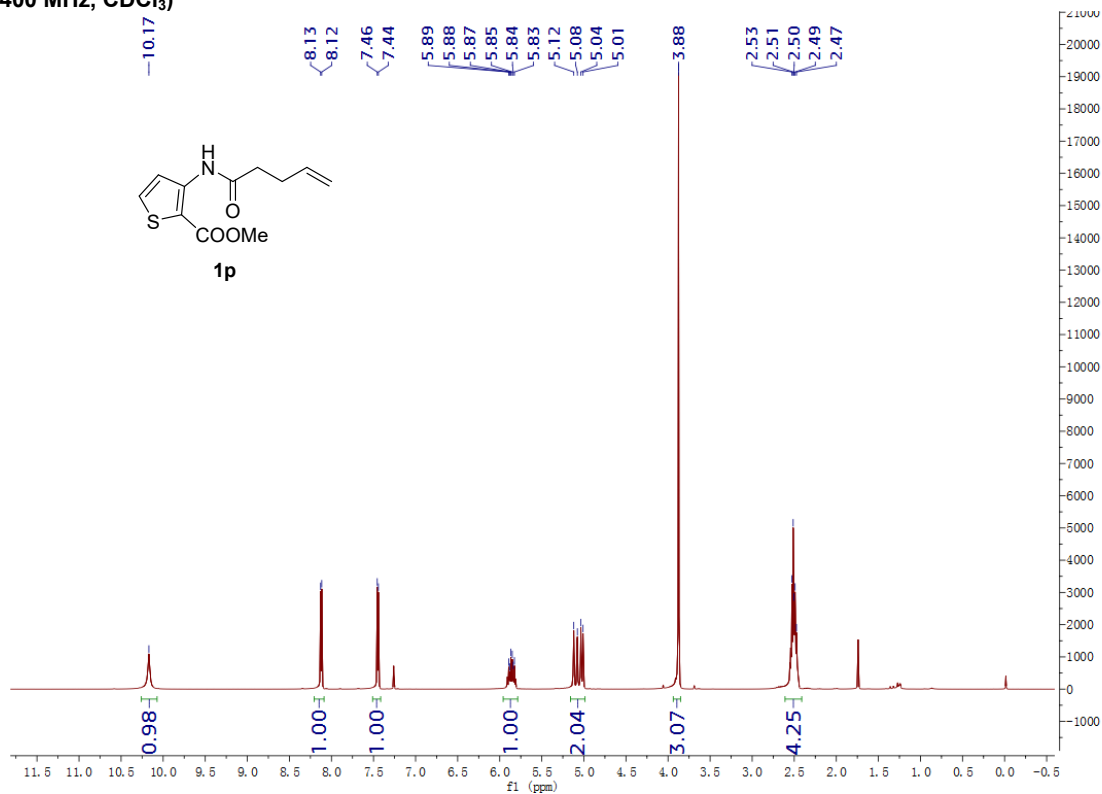

**<sup>13</sup>C-NMR (101 MHz, CDCl<sub>3</sub>)**

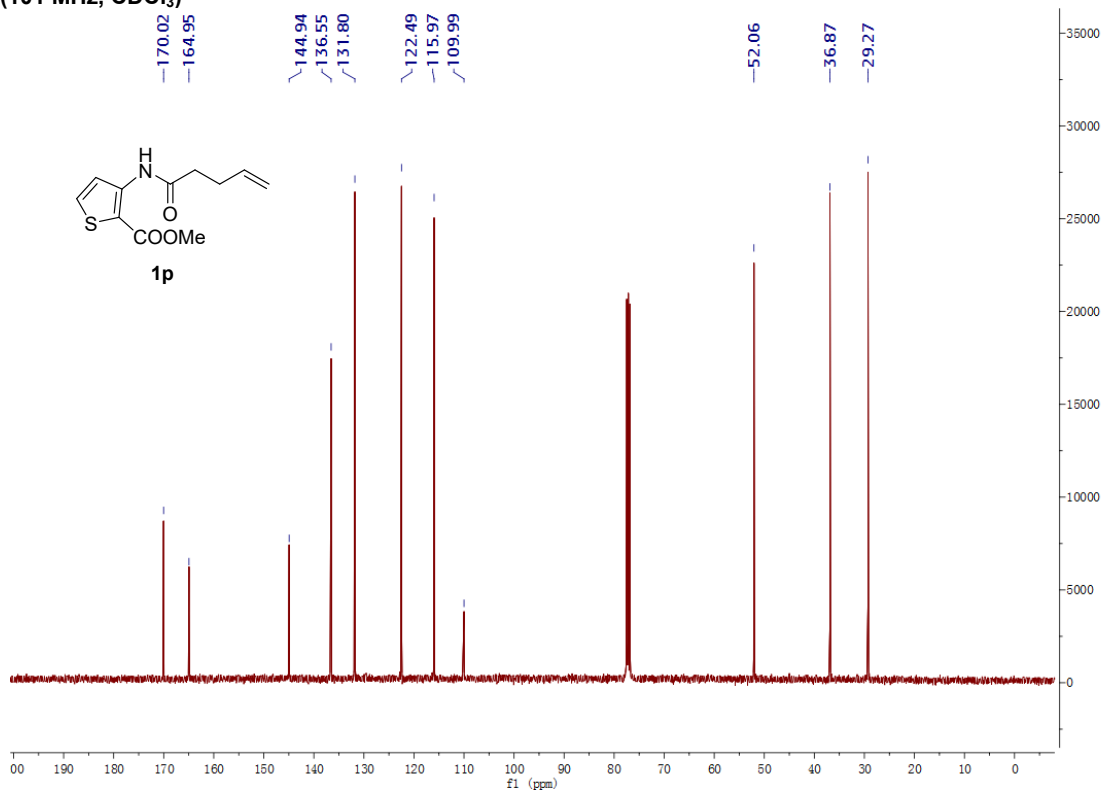

**<sup>1</sup>H-NMR (400 MHz, CDCl<sub>3</sub>)**

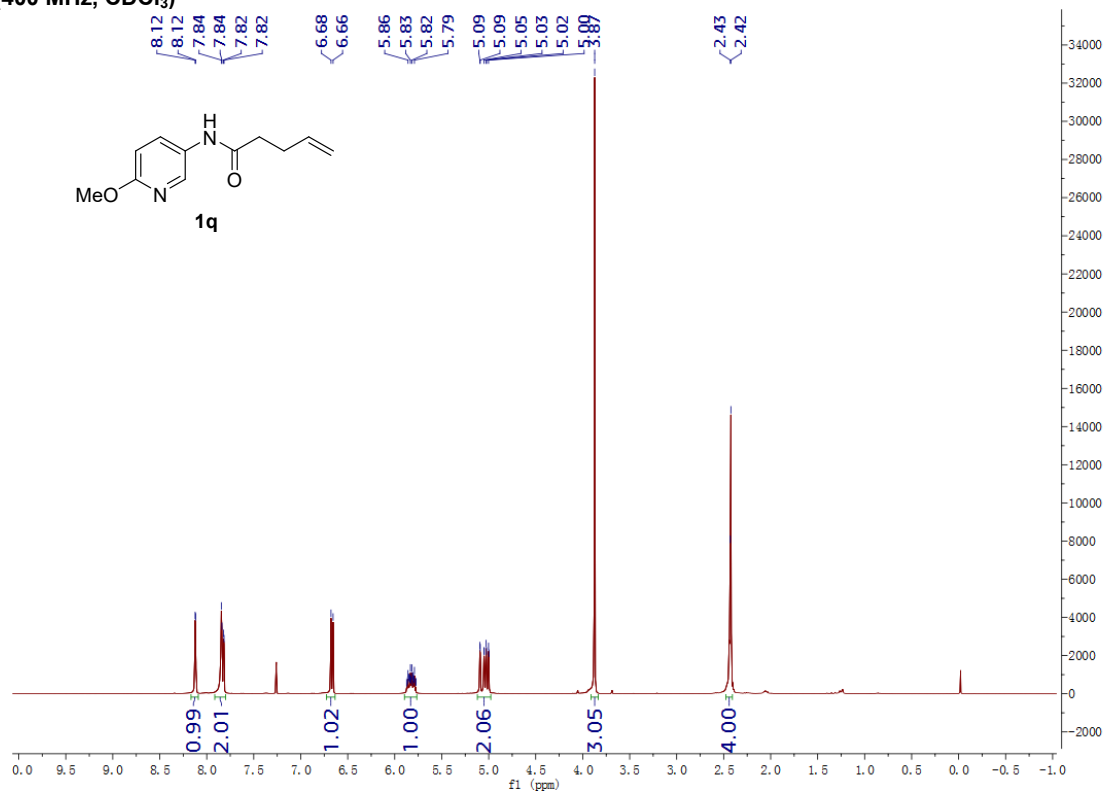

**<sup>13</sup>C-NMR (101 MHz, CDCl<sub>3</sub>)**

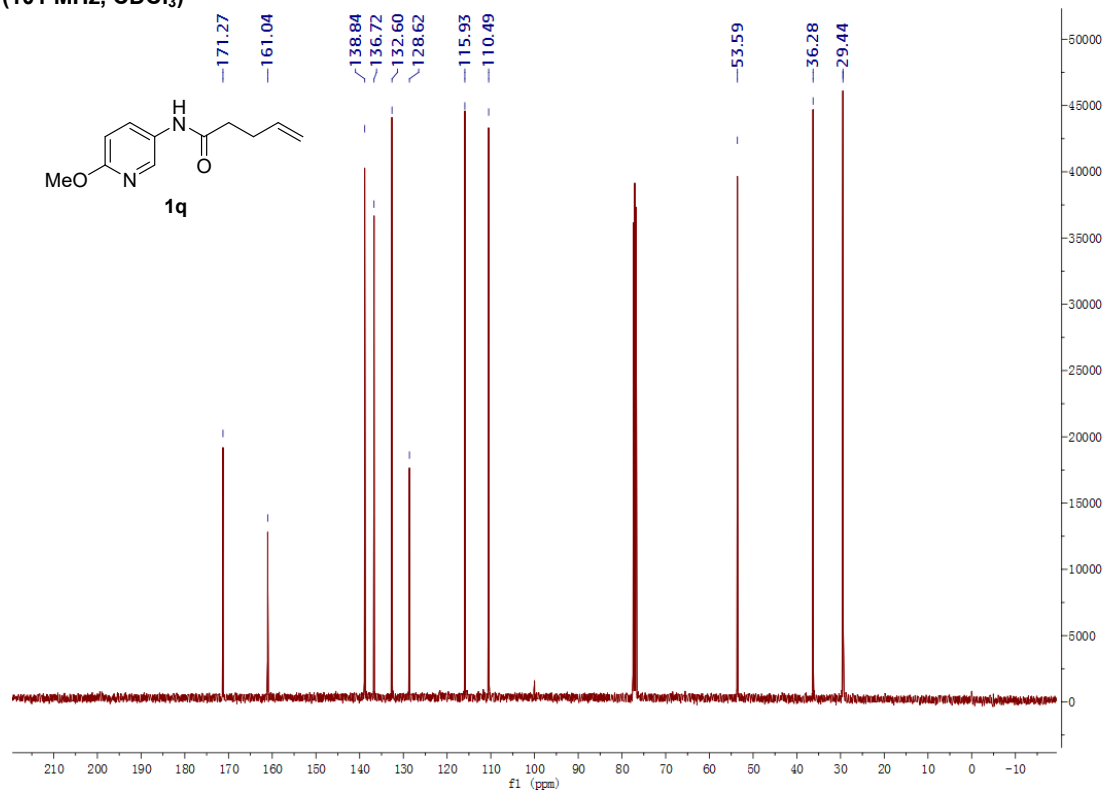

**<sup>1</sup>H-NMR (400 MHz, CDCl<sub>3</sub>)**

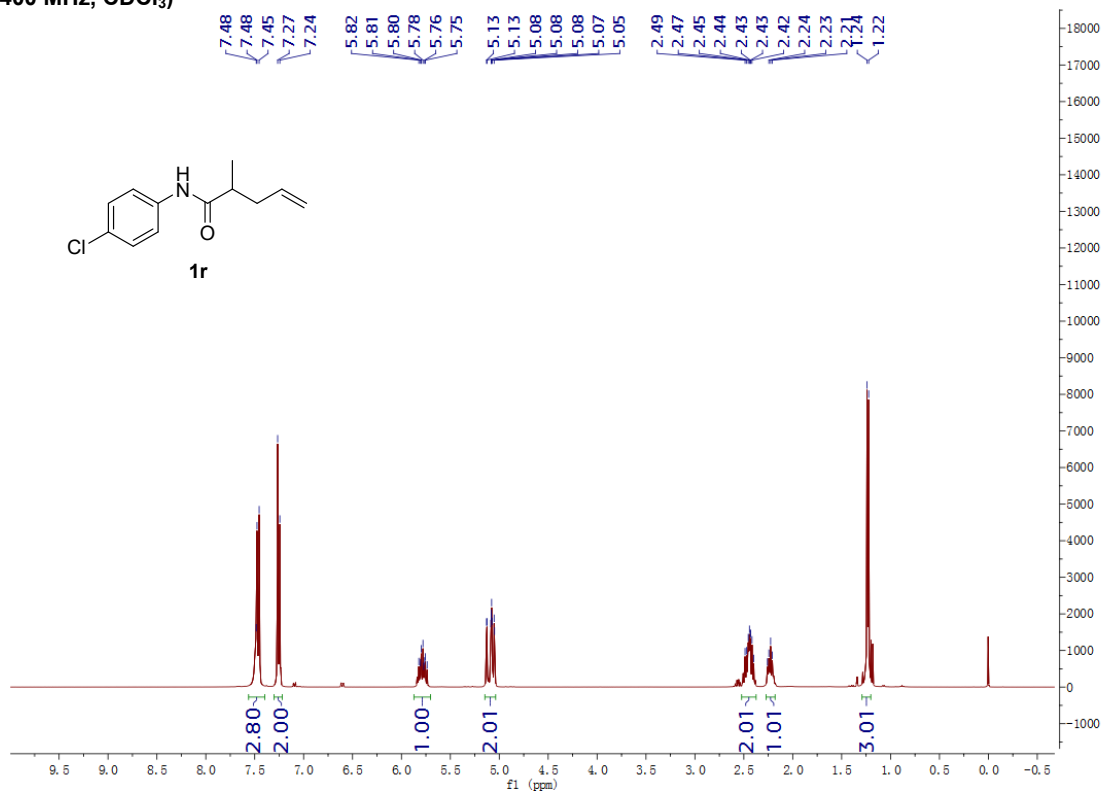

**<sup>13</sup>C-NMR (101 MHz, CDCl<sub>3</sub>)**

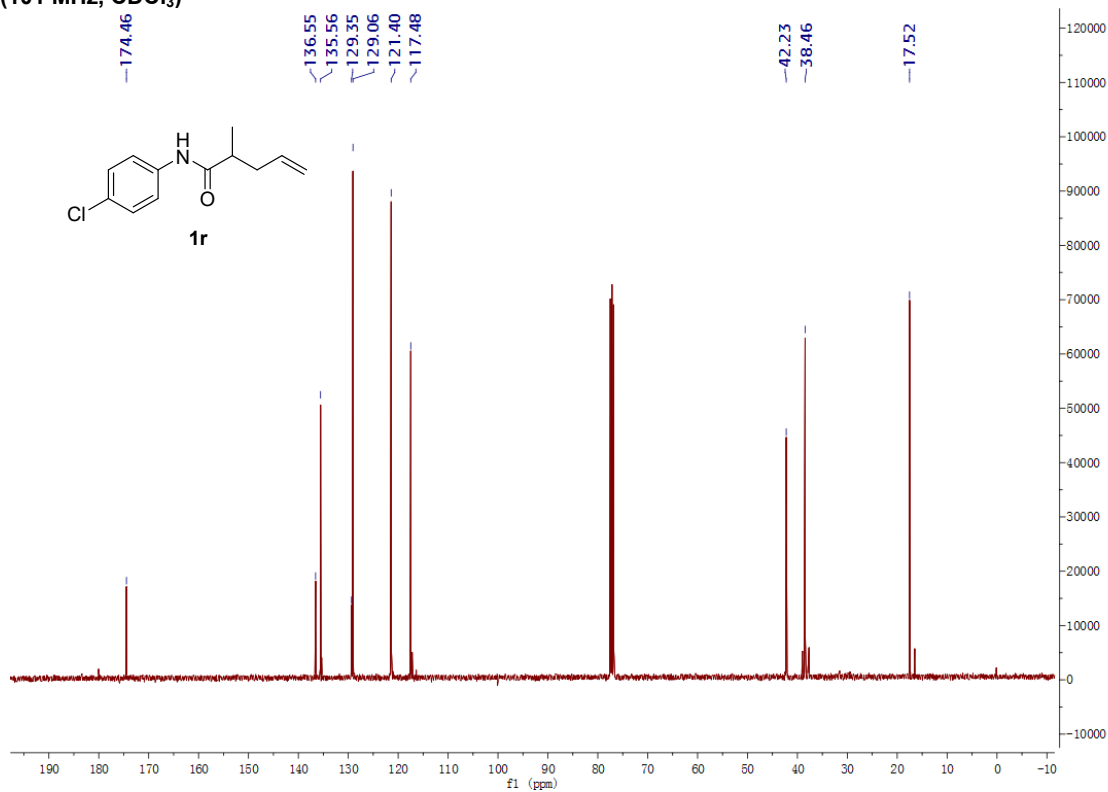

**<sup>1</sup>H-NMR (400 MHz, CDCl<sub>3</sub>)**

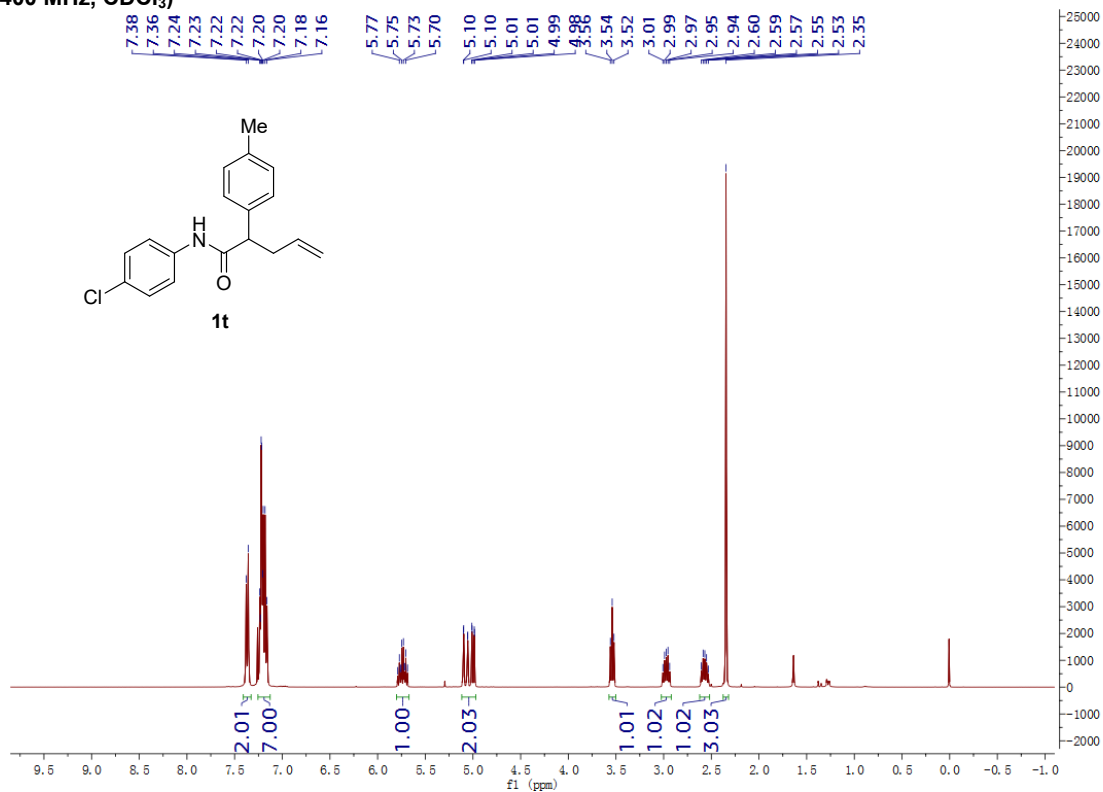

**<sup>13</sup>C-NMR (101 MHz, CDCl<sub>3</sub>)**

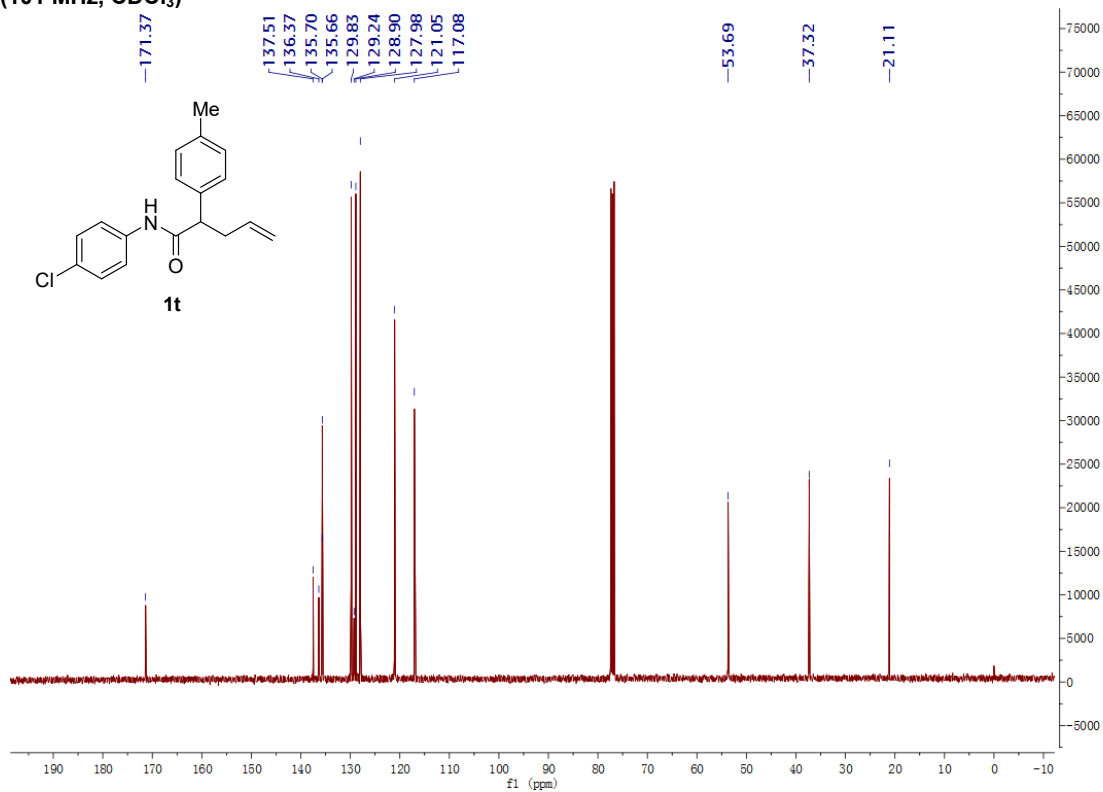

**<sup>1</sup>H-NMR (400 MHz, CDCl<sub>3</sub>)**

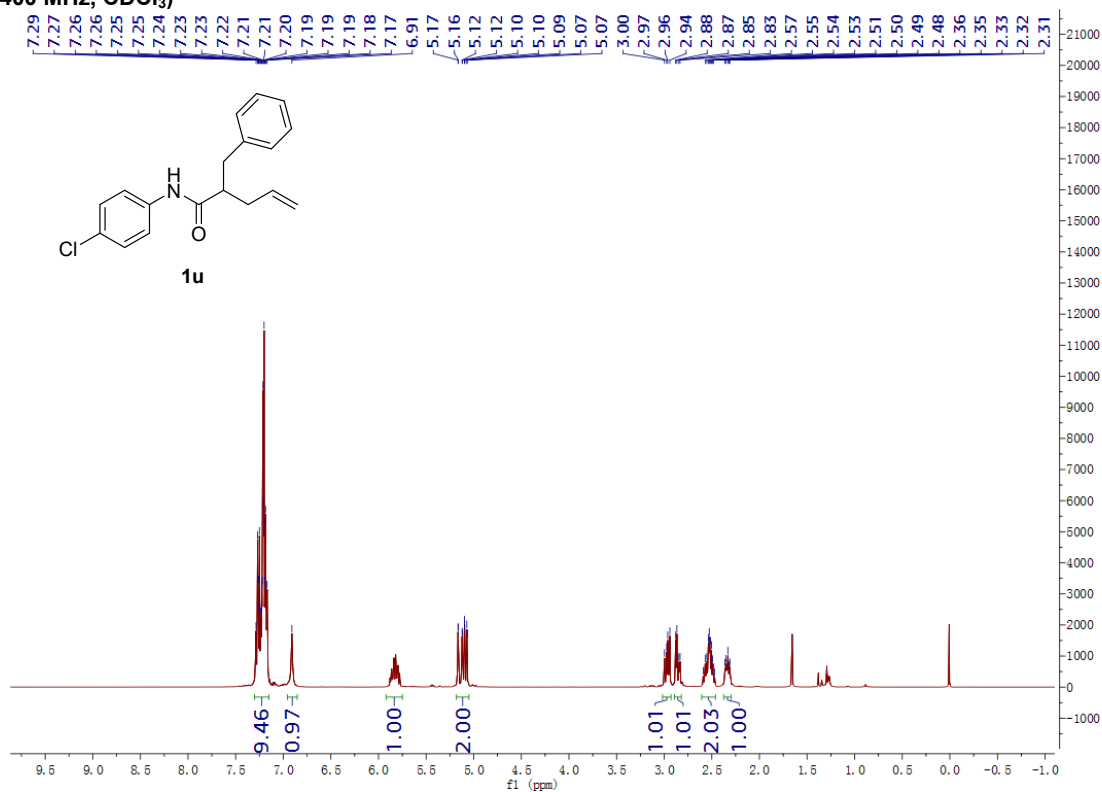

**<sup>13</sup>C-NMR (101 MHz, CDCl<sub>3</sub>)**

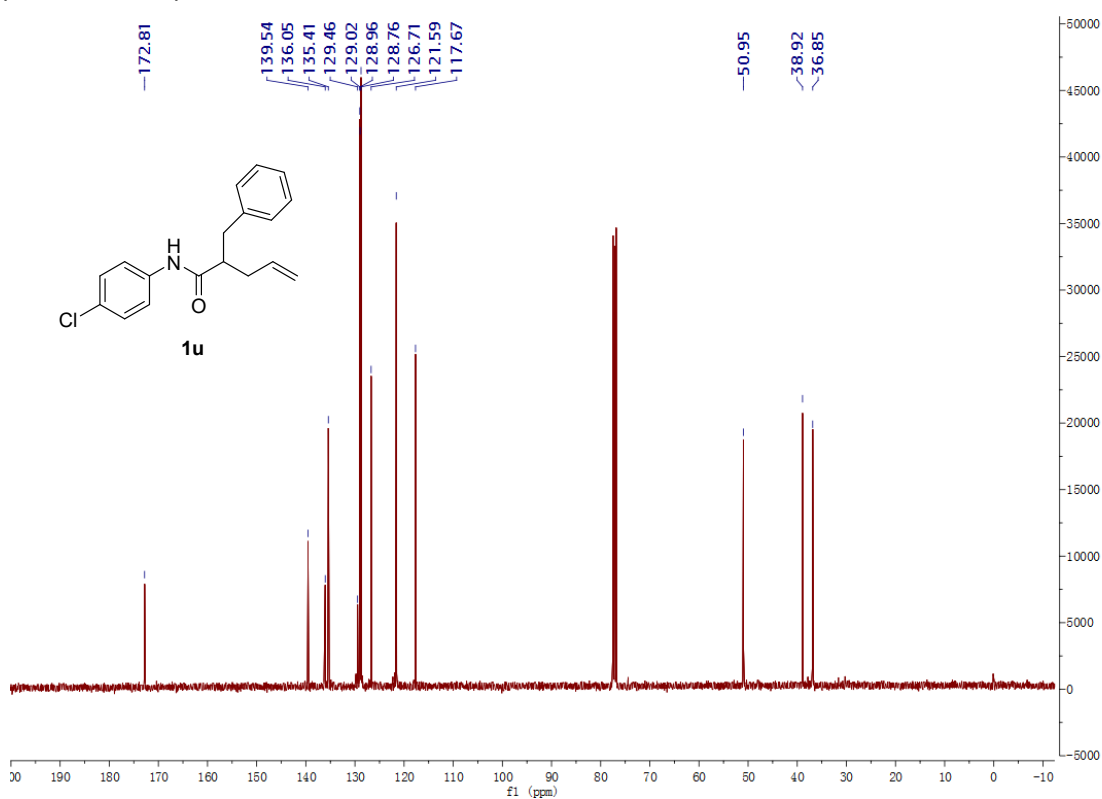

**<sup>1</sup>H-NMR (400 MHz, CDCl<sub>3</sub>)**

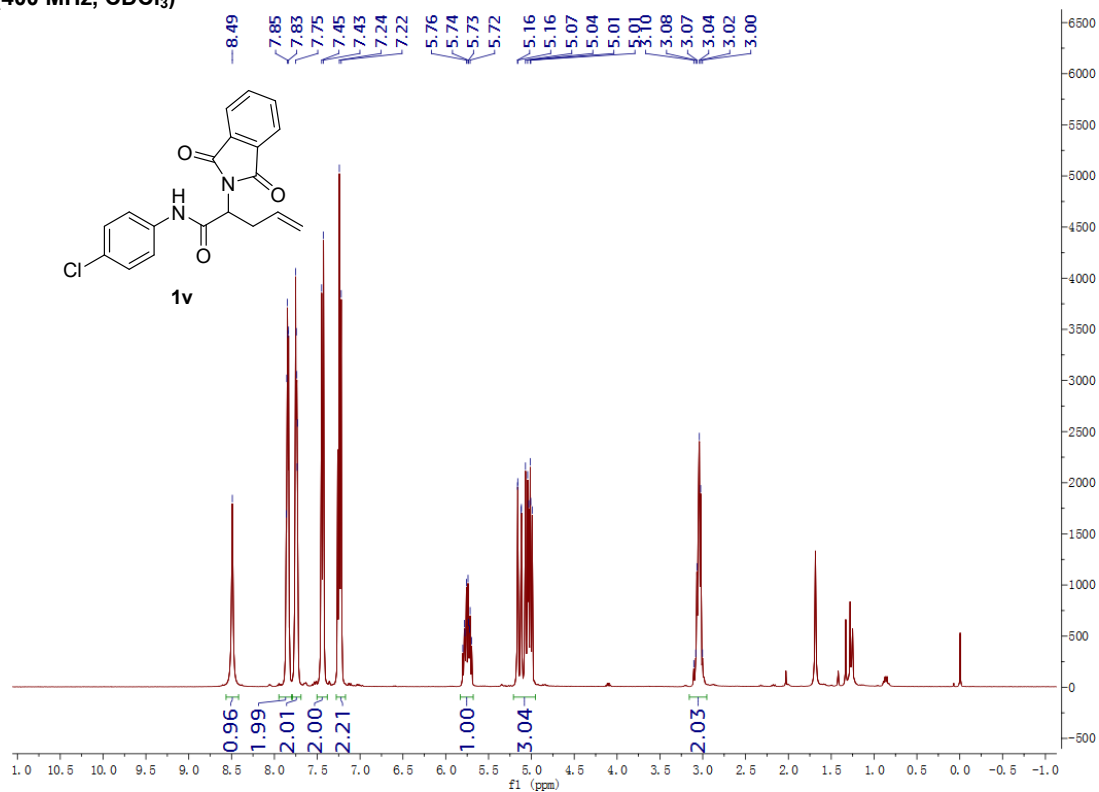

**<sup>13</sup>C-NMR (101 MHz, CDCl<sub>3</sub>)**

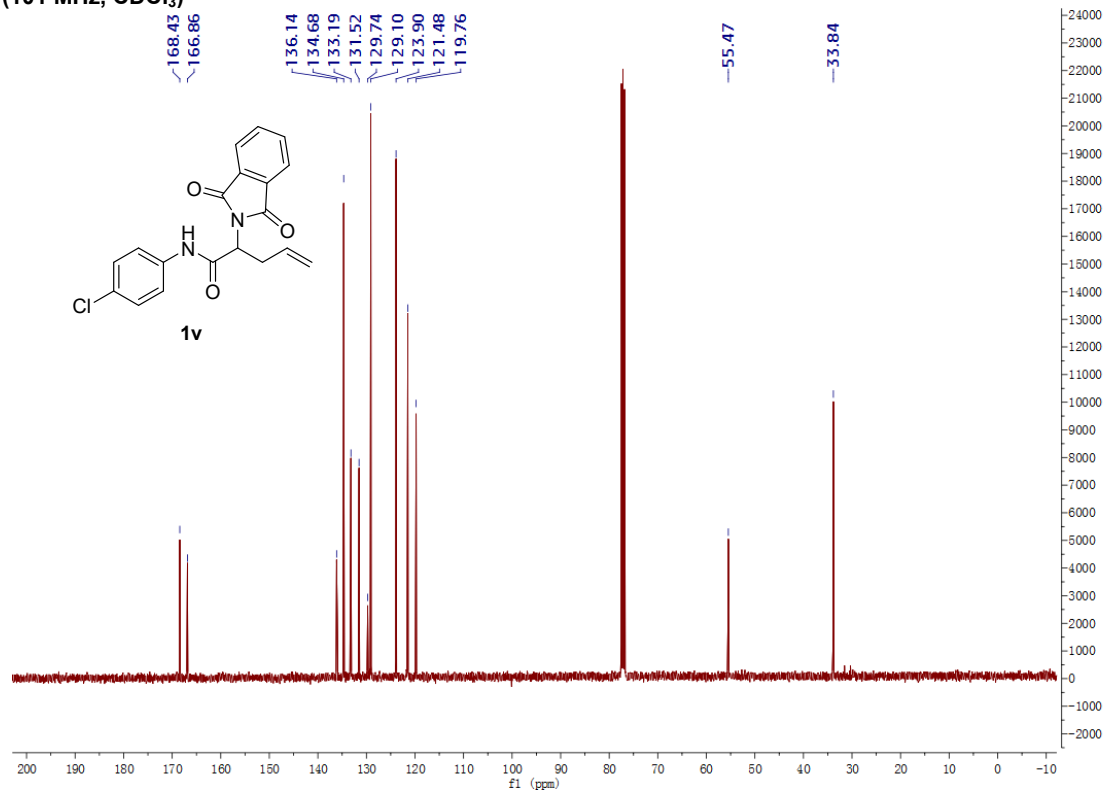

**<sup>1</sup>H-NMR (400 MHz, CDCl<sub>3</sub>)**

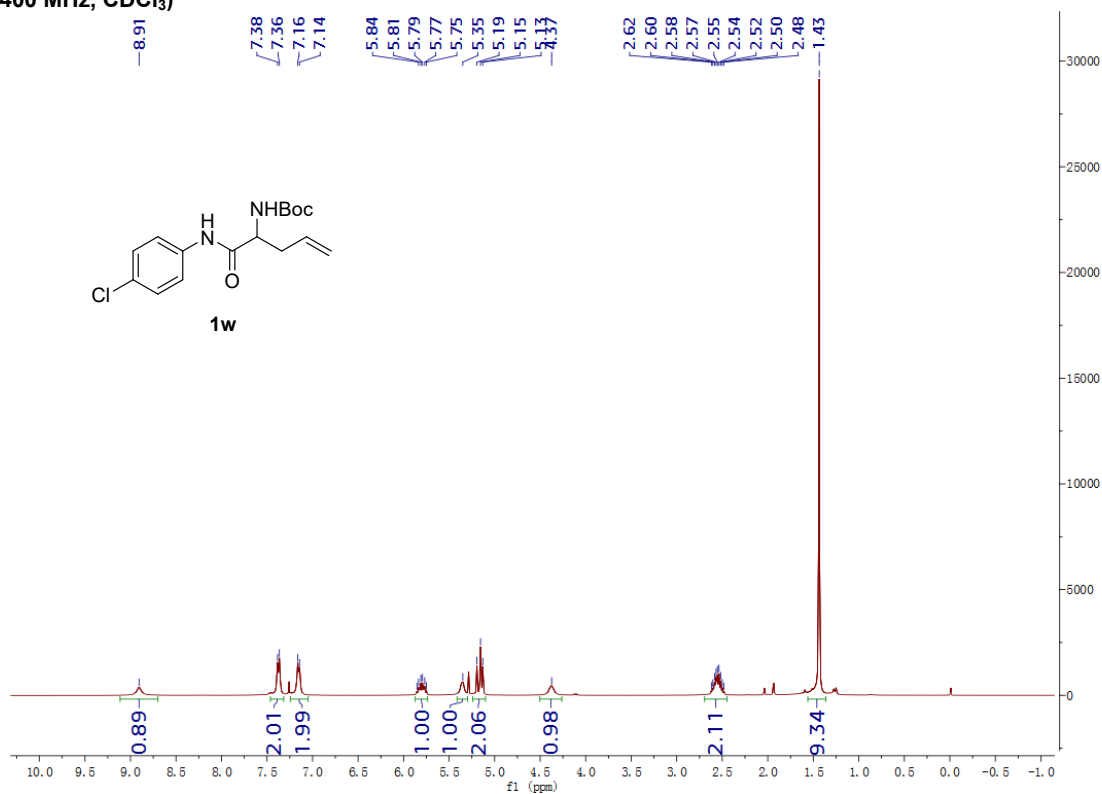

**<sup>13</sup>C-NMR (101 MHz, CDCl<sub>3</sub>)**

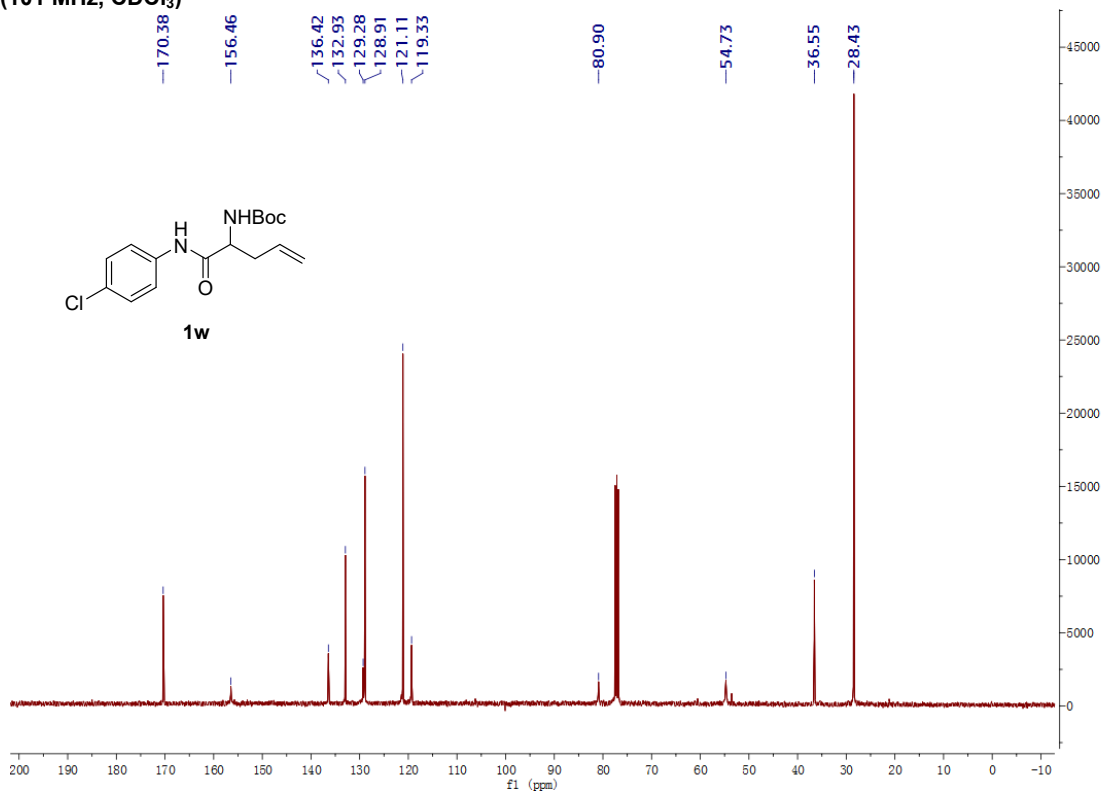



**<sup>1</sup>H-NMR (400 MHz, DMSO-*d*<sub>6</sub>)**

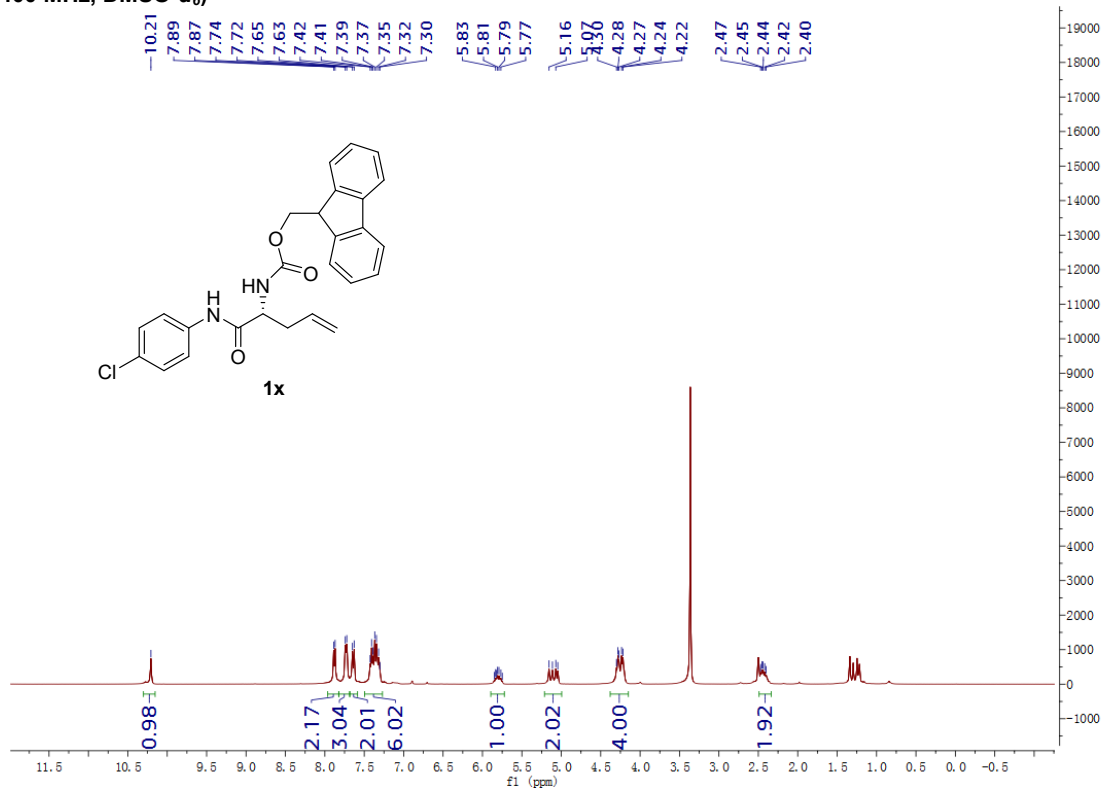

**<sup>13</sup>C-NMR (101 MHz, DMSO-*d*<sub>6</sub>)**

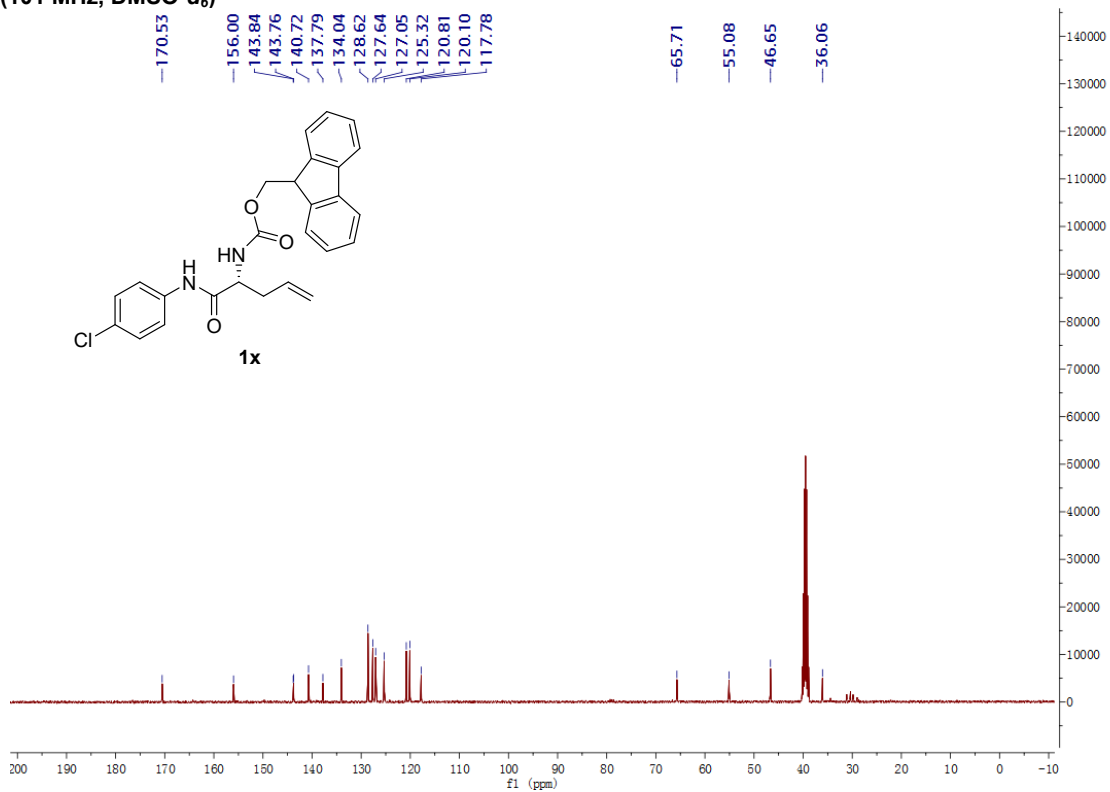

**<sup>1</sup>H-NMR (400 MHz, CDCl<sub>3</sub>)**

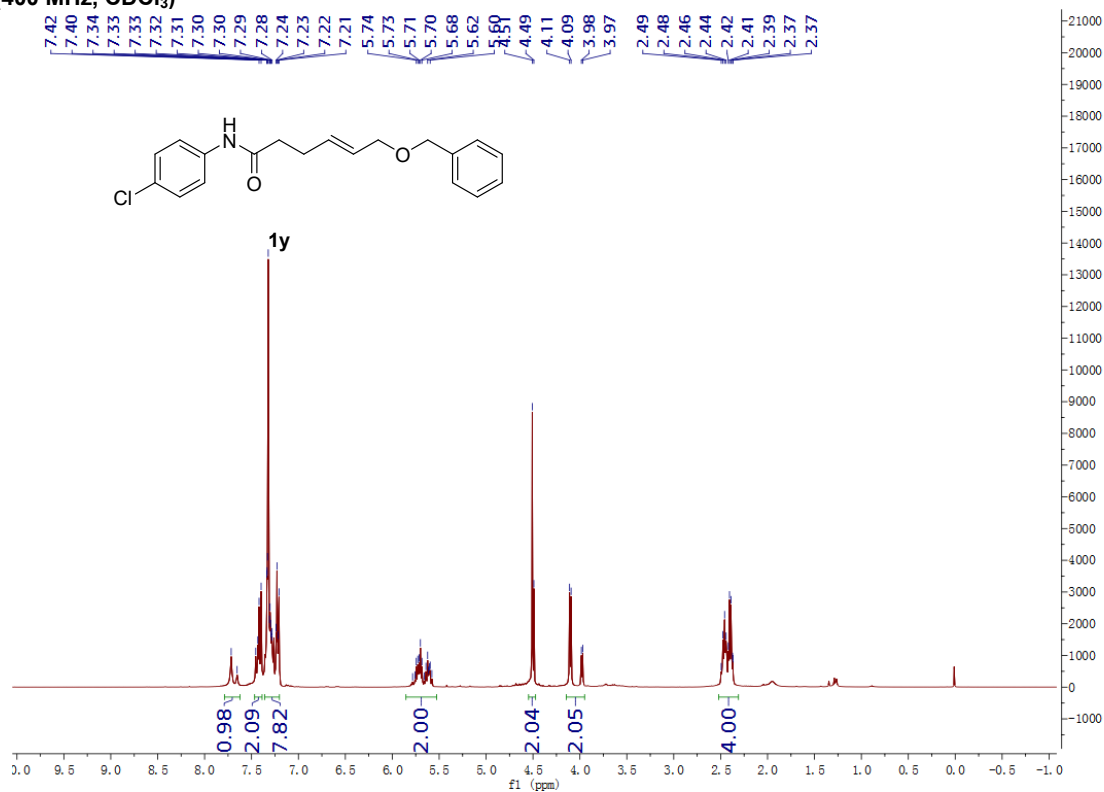

**<sup>13</sup>C-NMR (101 MHz, CDCl<sub>3</sub>)**

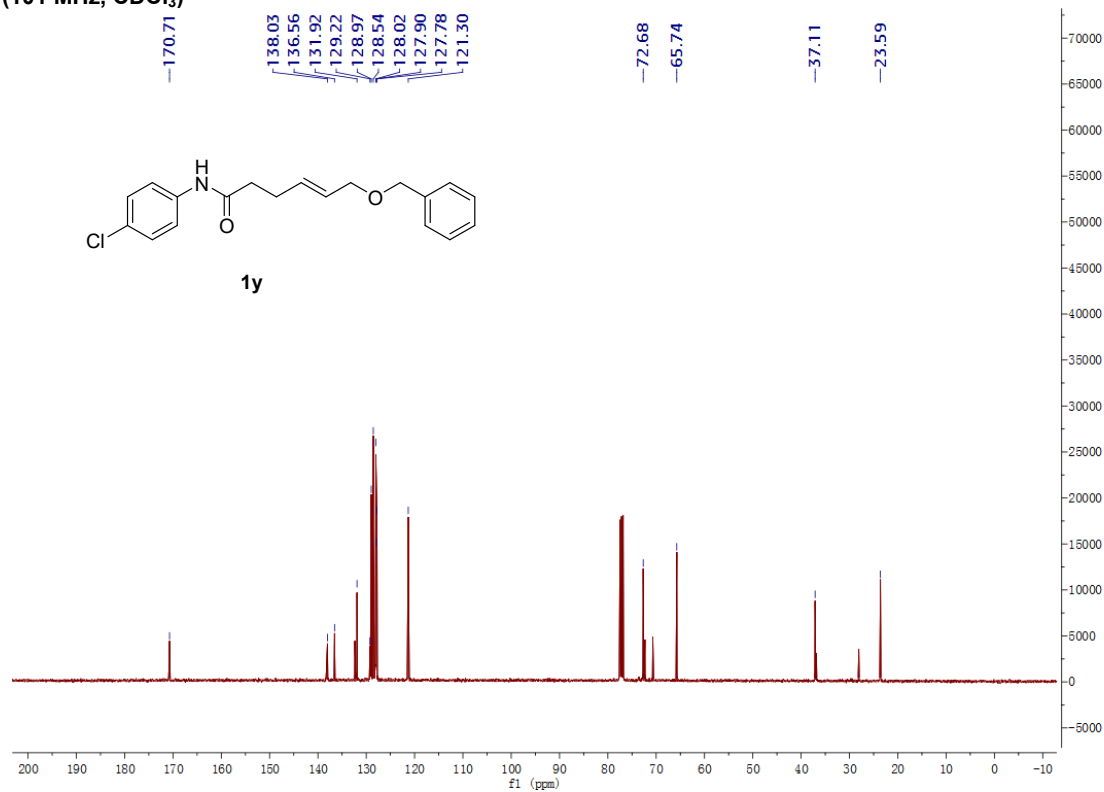

**<sup>1</sup>H-NMR (400 MHz, CDCl<sub>3</sub>)**

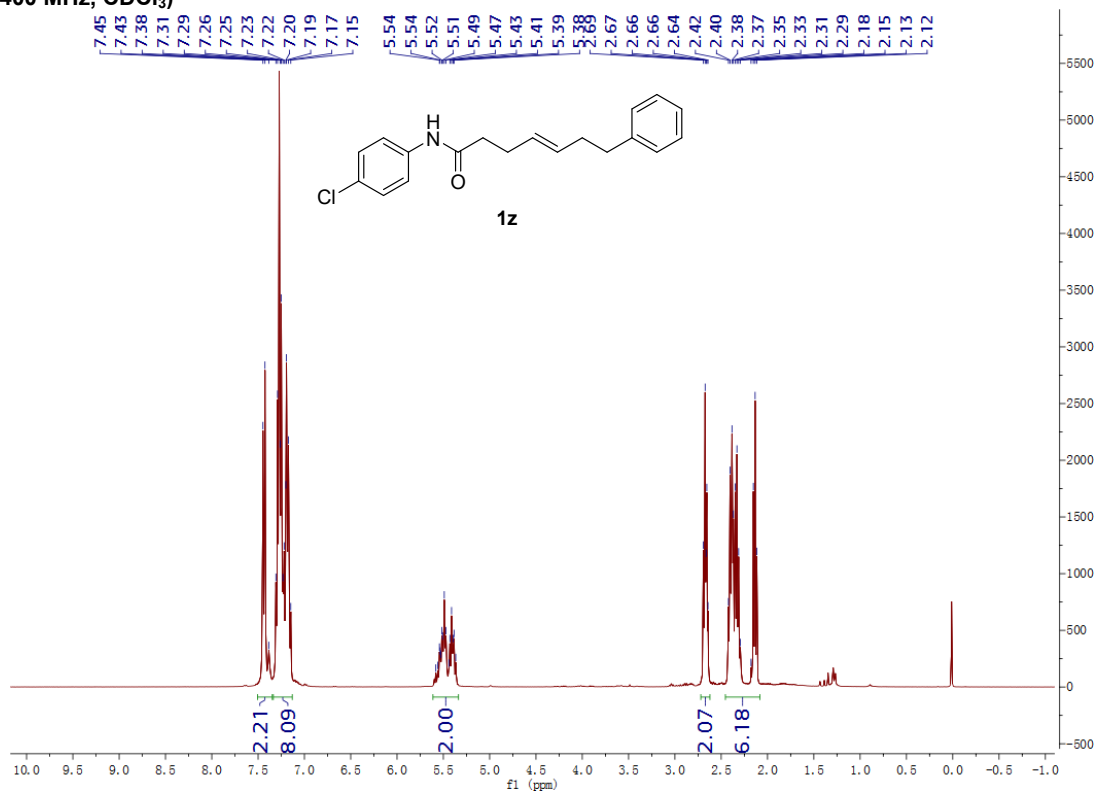

**<sup>13</sup>C-NMR (101 MHz, CDCl<sub>3</sub>)**

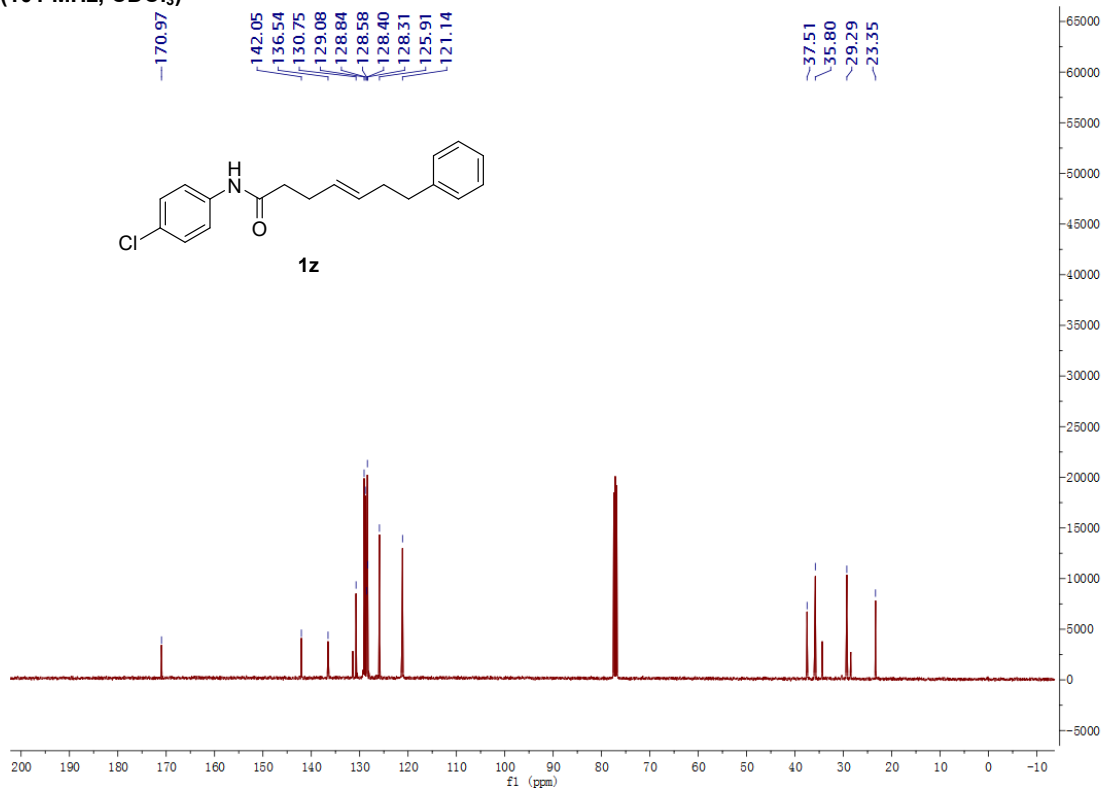

**<sup>1</sup>H-NMR (400 MHz, DMSO-*d*<sub>6</sub>)**

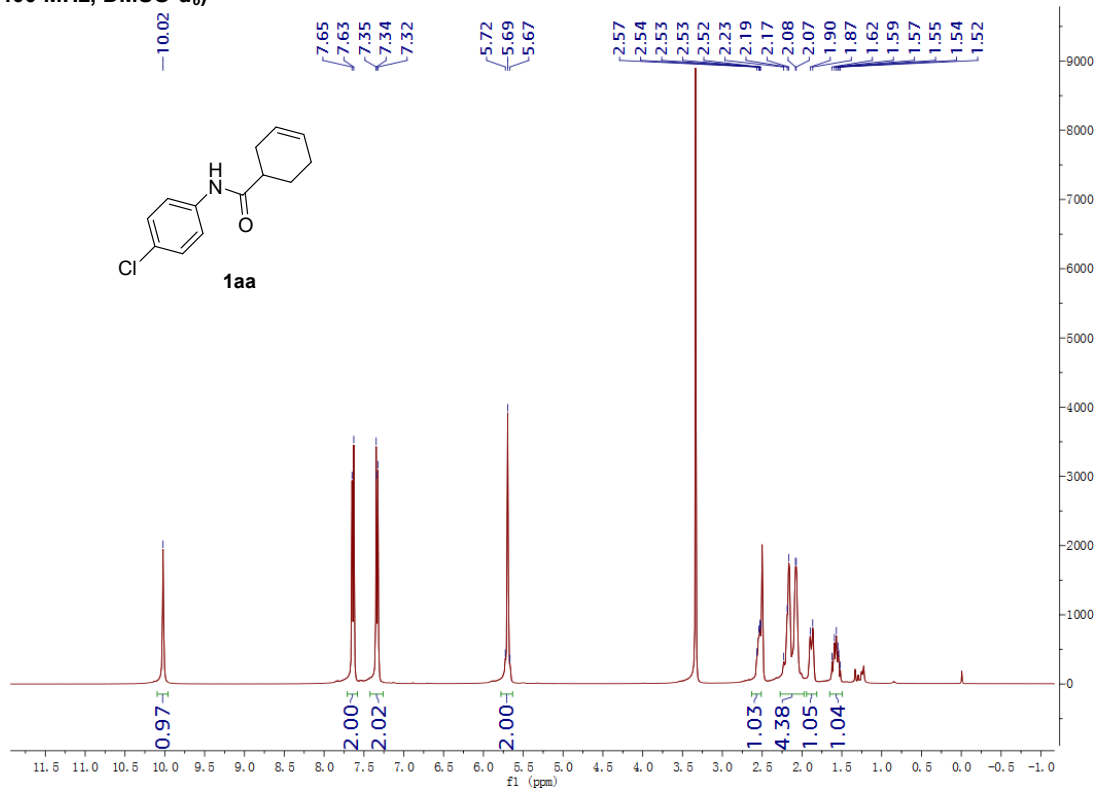

**<sup>13</sup>C-NMR (101 MHz, DMSO-*d*<sub>6</sub>)**

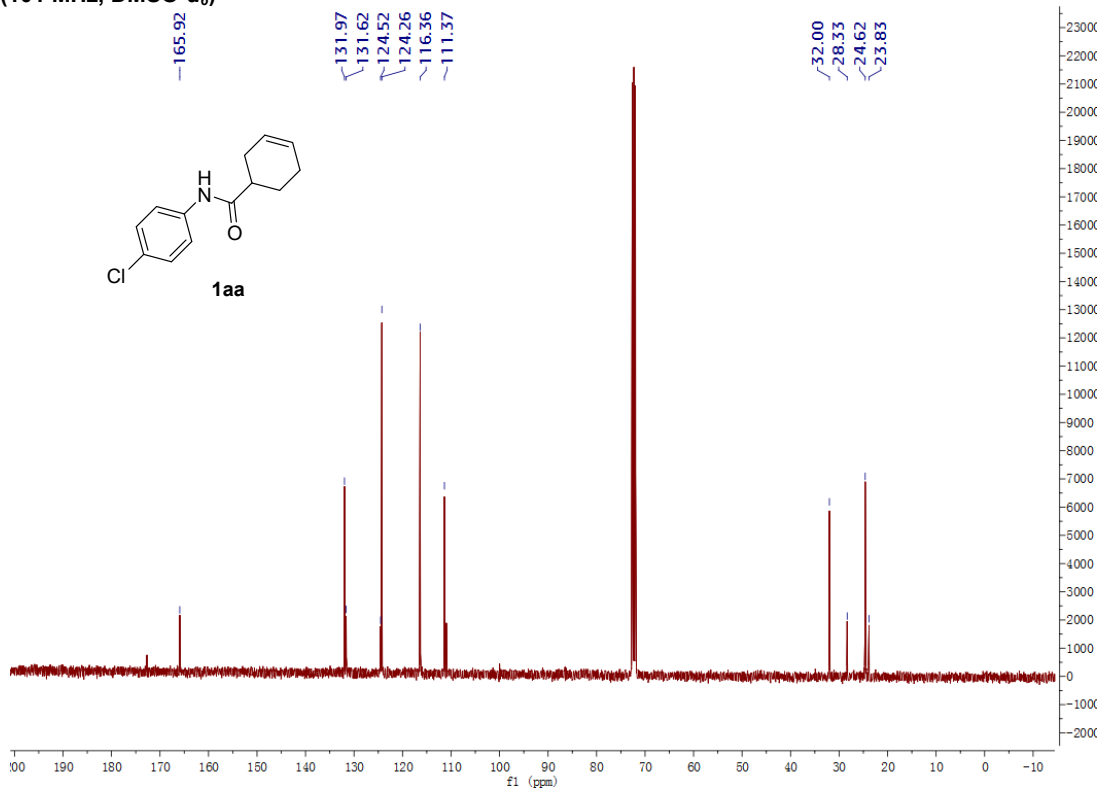

**<sup>1</sup>H-NMR (400 MHz, DMSO-*d*<sub>6</sub>)**

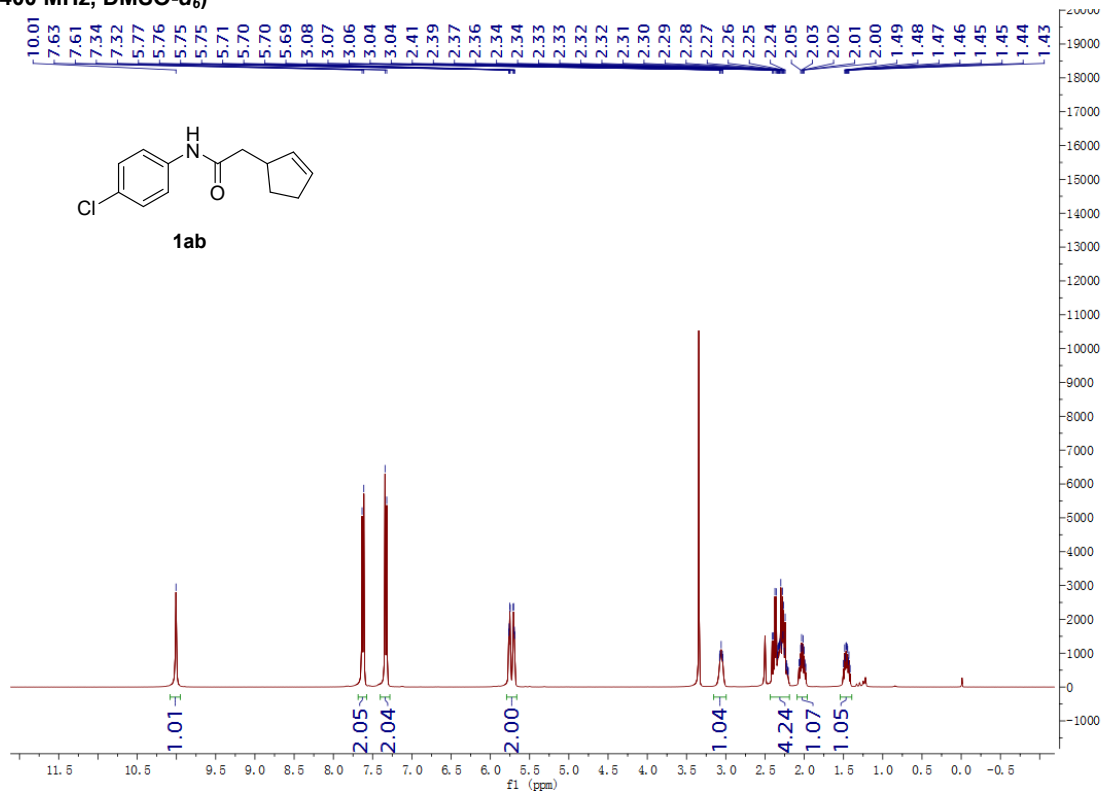

**<sup>13</sup>C-NMR (101 MHz, DMSO-*d*<sub>6</sub>)**

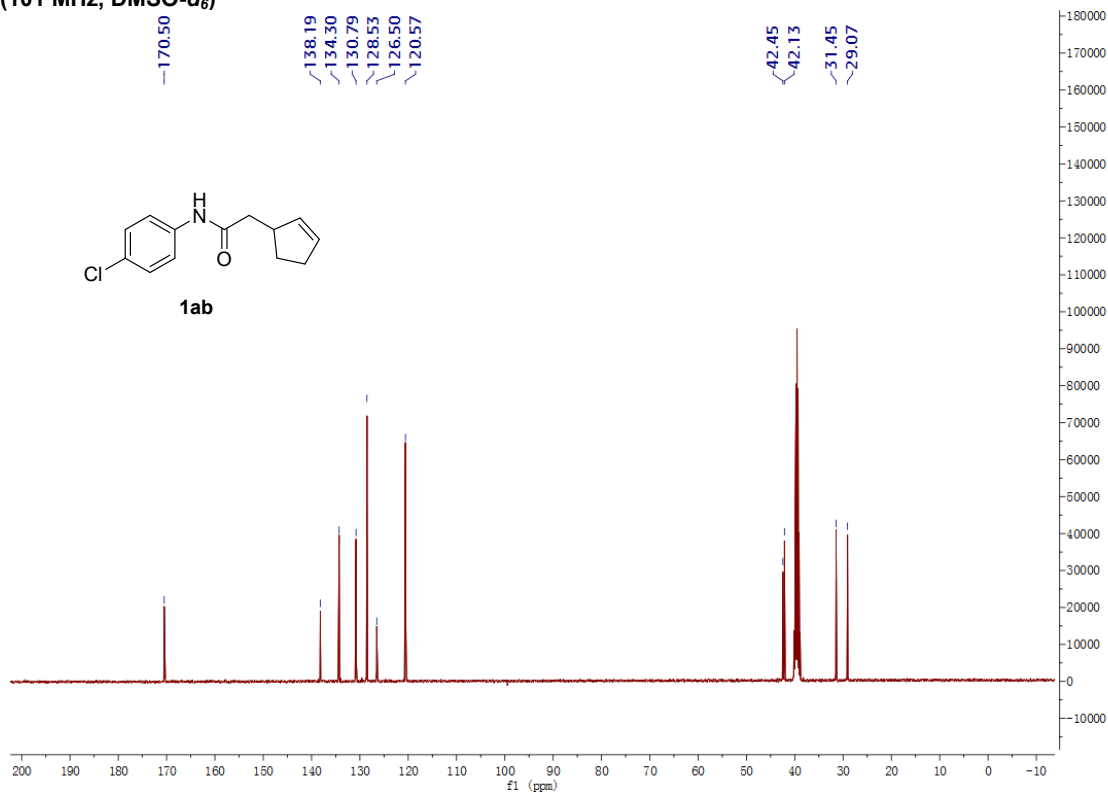

**<sup>1</sup>H-NMR (400 MHz, DMSO-*d*<sub>6</sub>)**

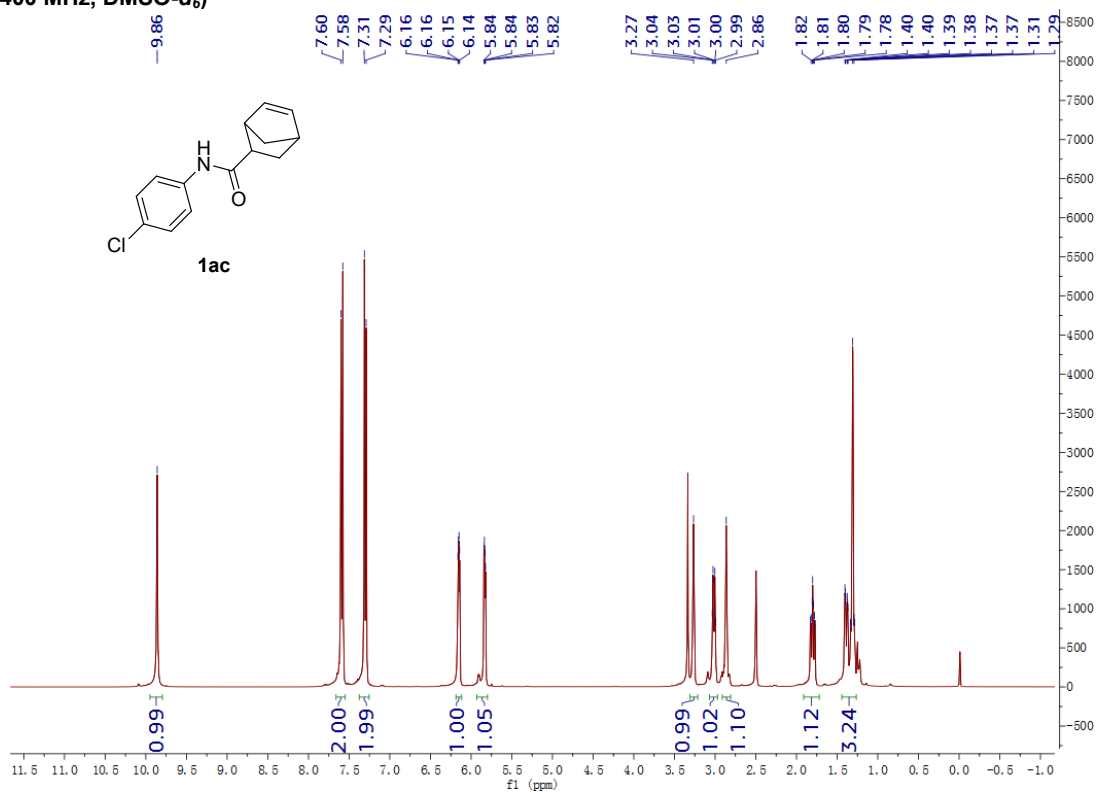

**<sup>13</sup>C-NMR (101 MHz, DMSO-*d*<sub>6</sub>)**

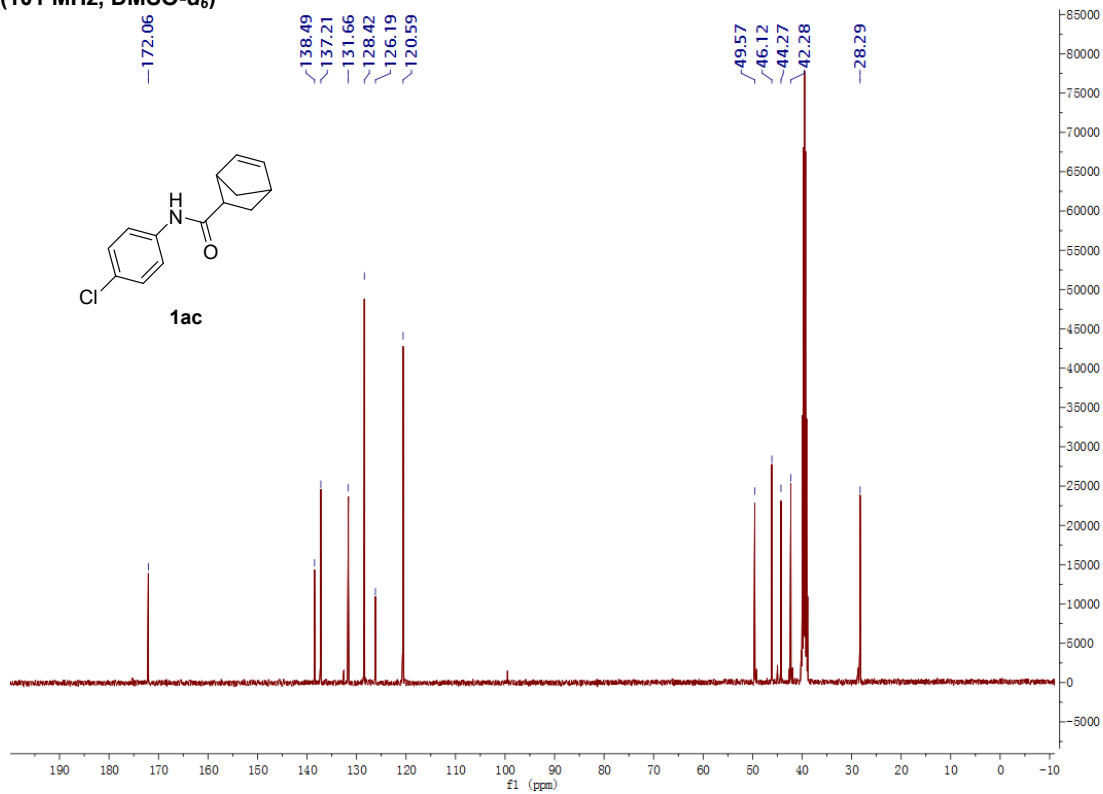

**<sup>1</sup>H-NMR (400 MHz, DMSO-*d*<sub>6</sub>)**

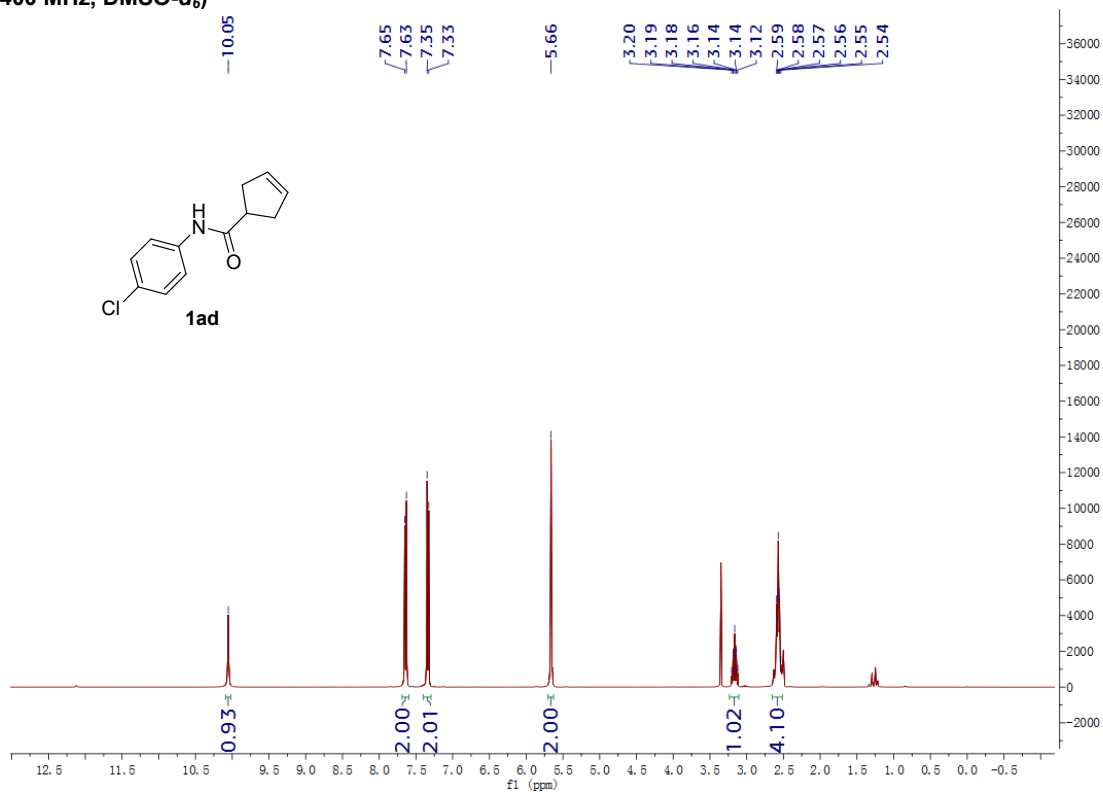

**<sup>13</sup>C-NMR (101 MHz, DMSO-*d*<sub>6</sub>)**

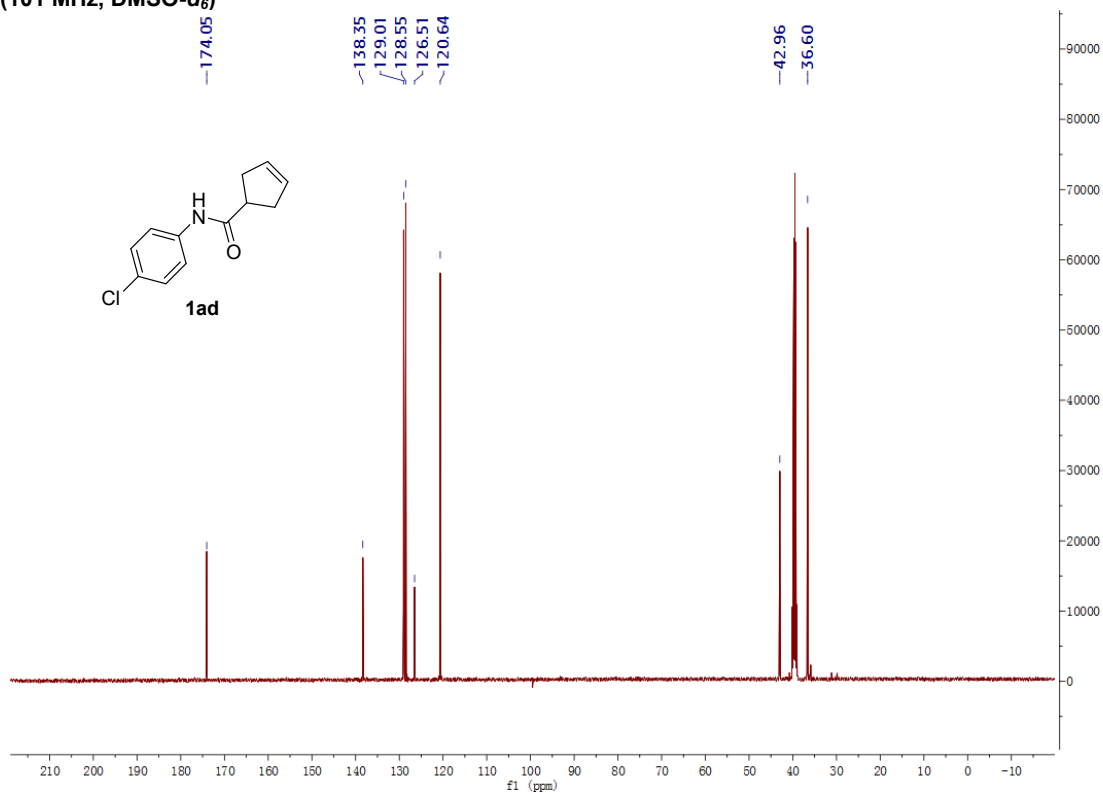

<sup>1</sup>H-NMR (400 MHz, CDCl<sub>3</sub>)

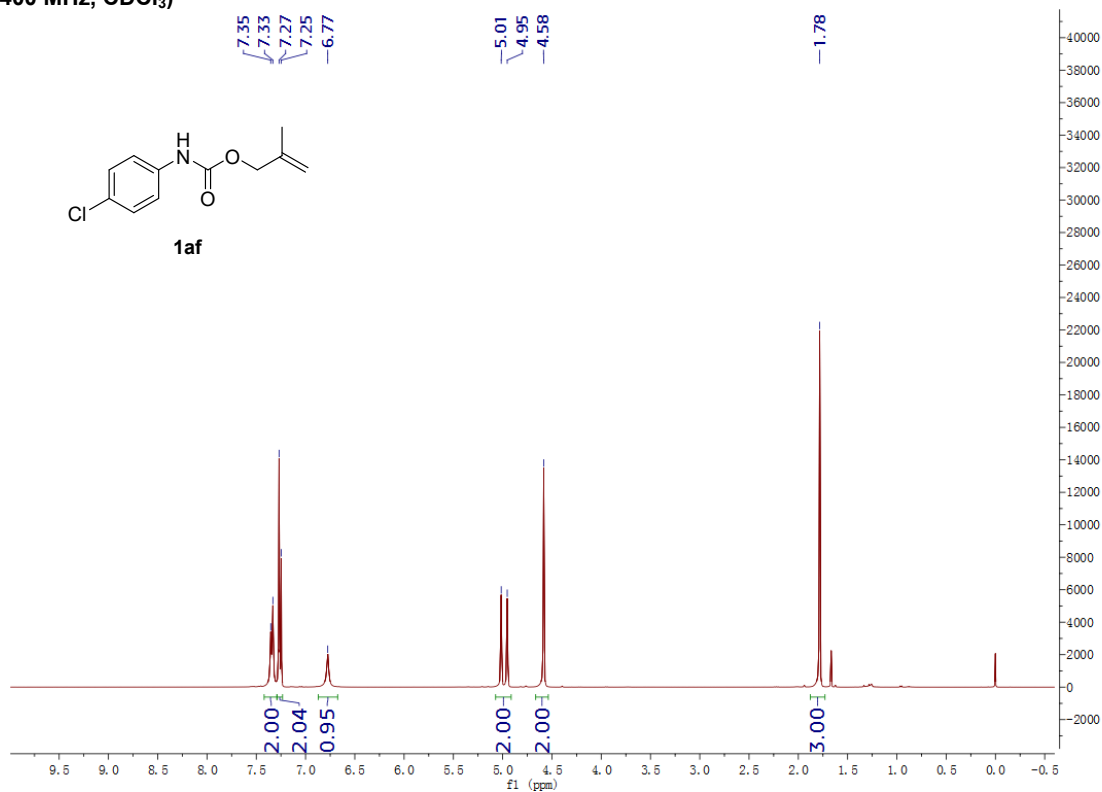

<sup>13</sup>C-NMR (101 MHz, CDCl<sub>3</sub>)

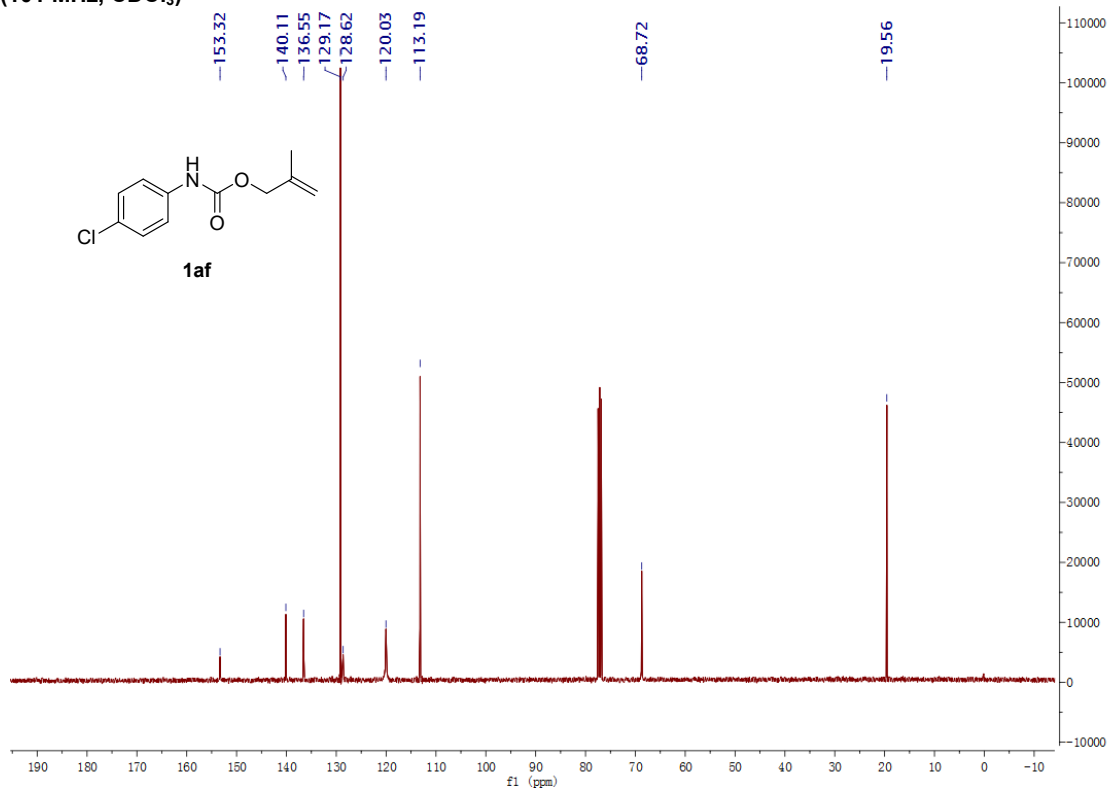



**<sup>1</sup>H-NMR (400 MHz, CDCl<sub>3</sub>)**

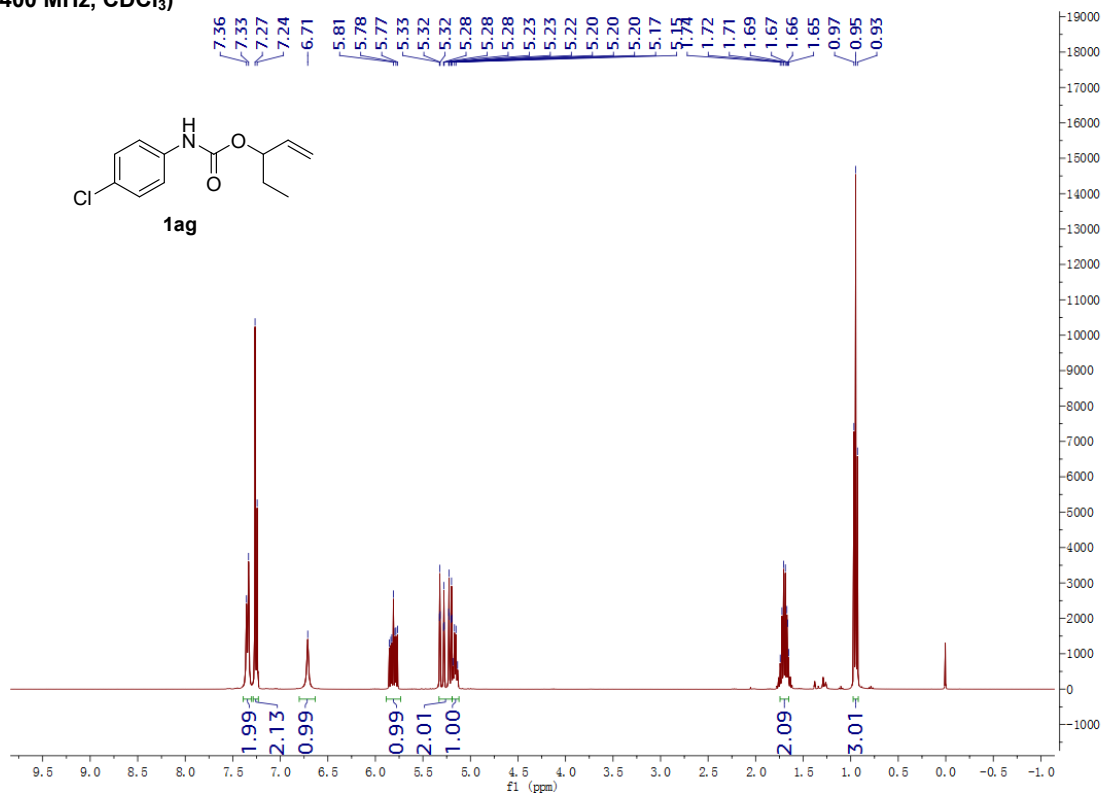

**<sup>13</sup>C-NMR (101 MHz, CDCl<sub>3</sub>)**

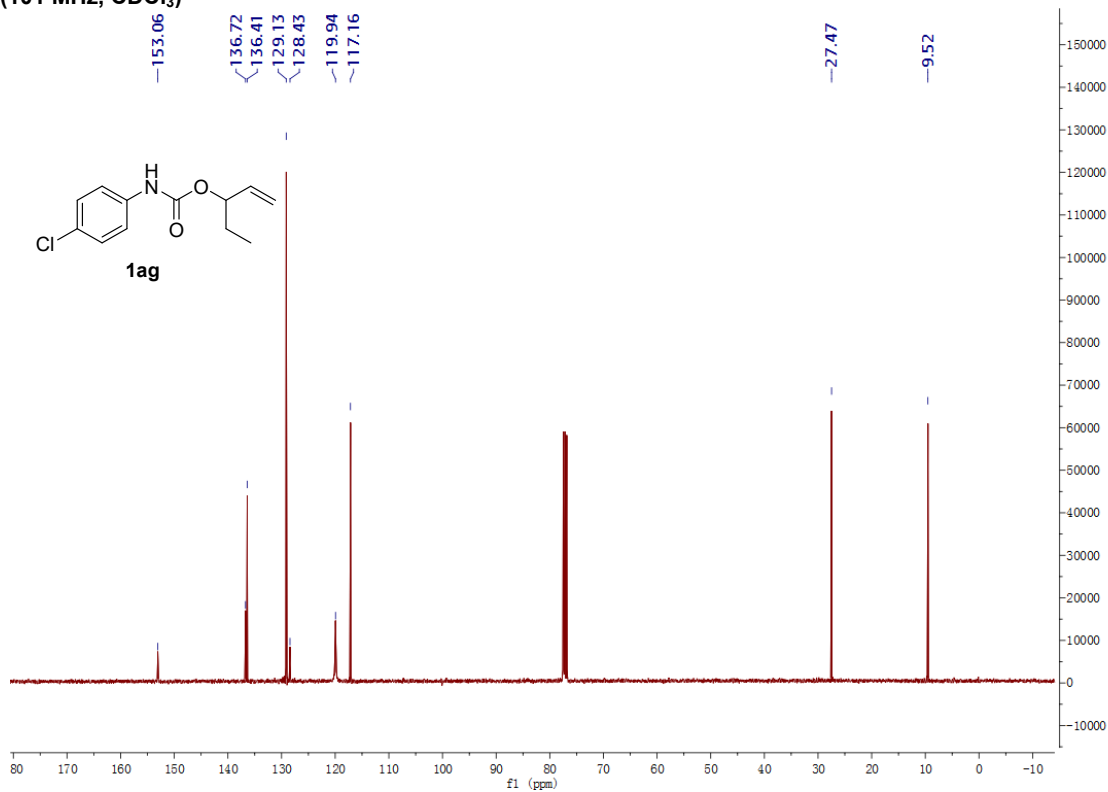

**<sup>1</sup>H-NMR (400 MHz, CDCl<sub>3</sub>)**

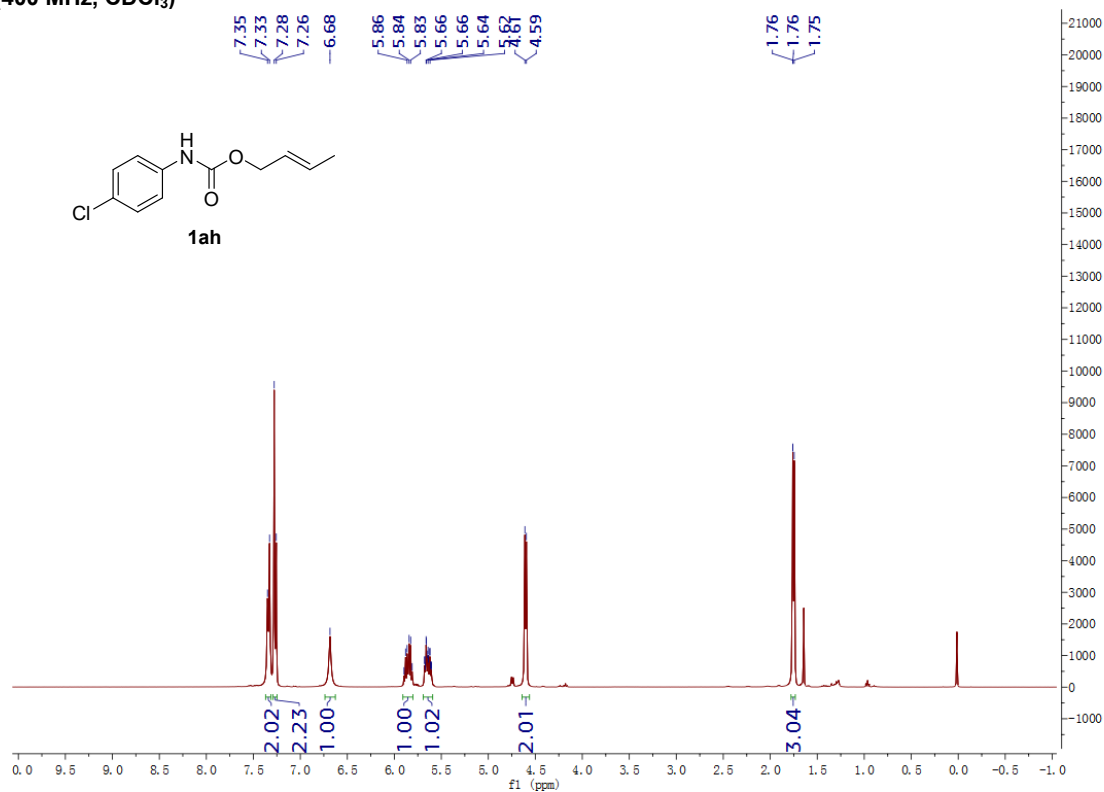

**<sup>13</sup>C-NMR (101 MHz, CDCl<sub>3</sub>)**

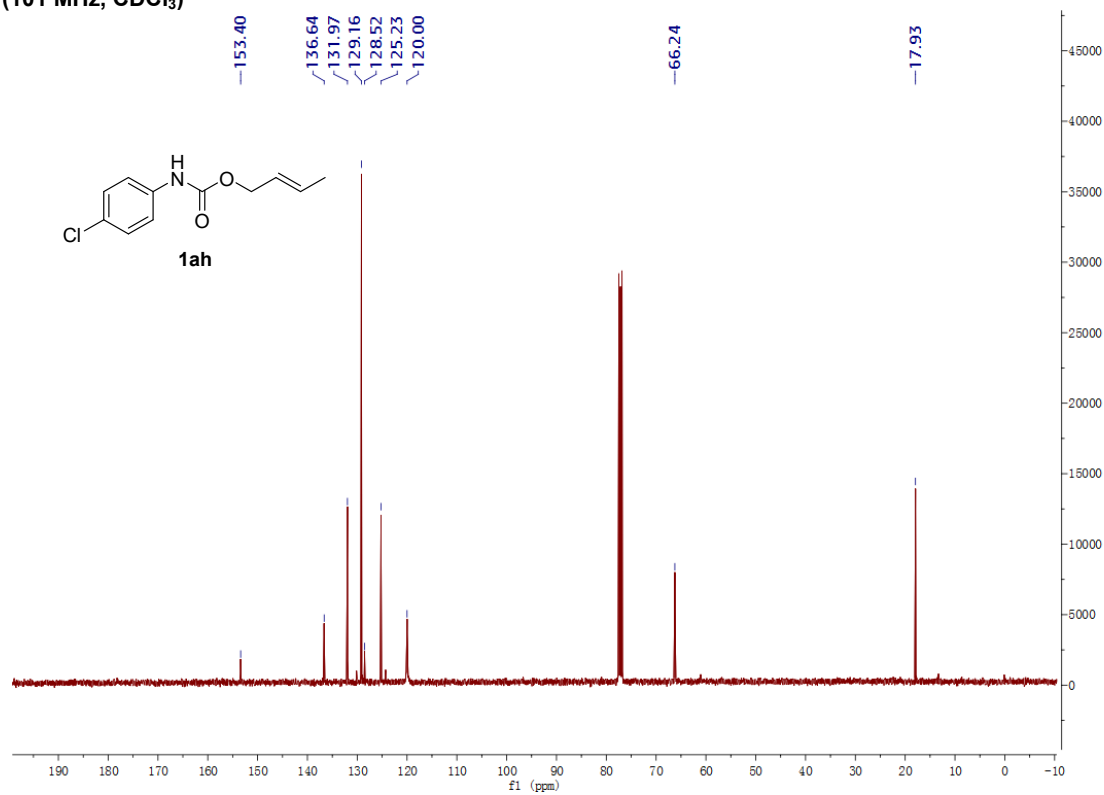

**<sup>1</sup>H-NMR (400 MHz, CDCl<sub>3</sub>)**

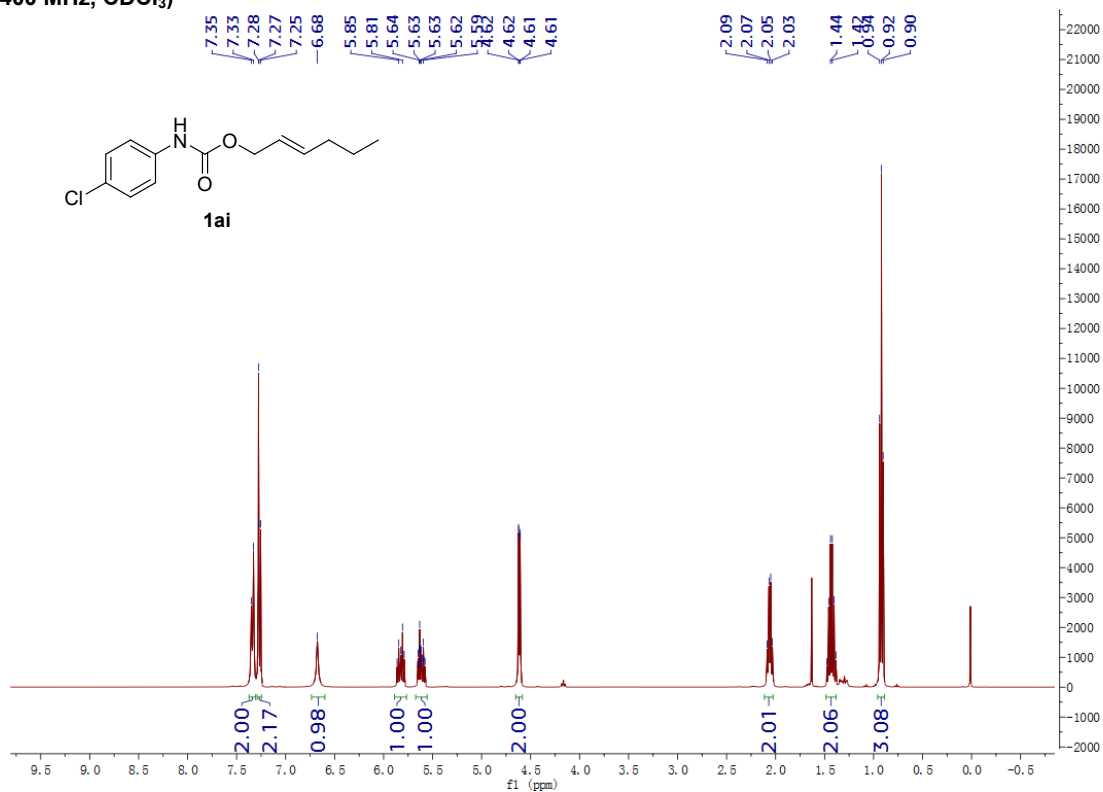

**<sup>13</sup>C-NMR (101 MHz, CDCl<sub>3</sub>)**

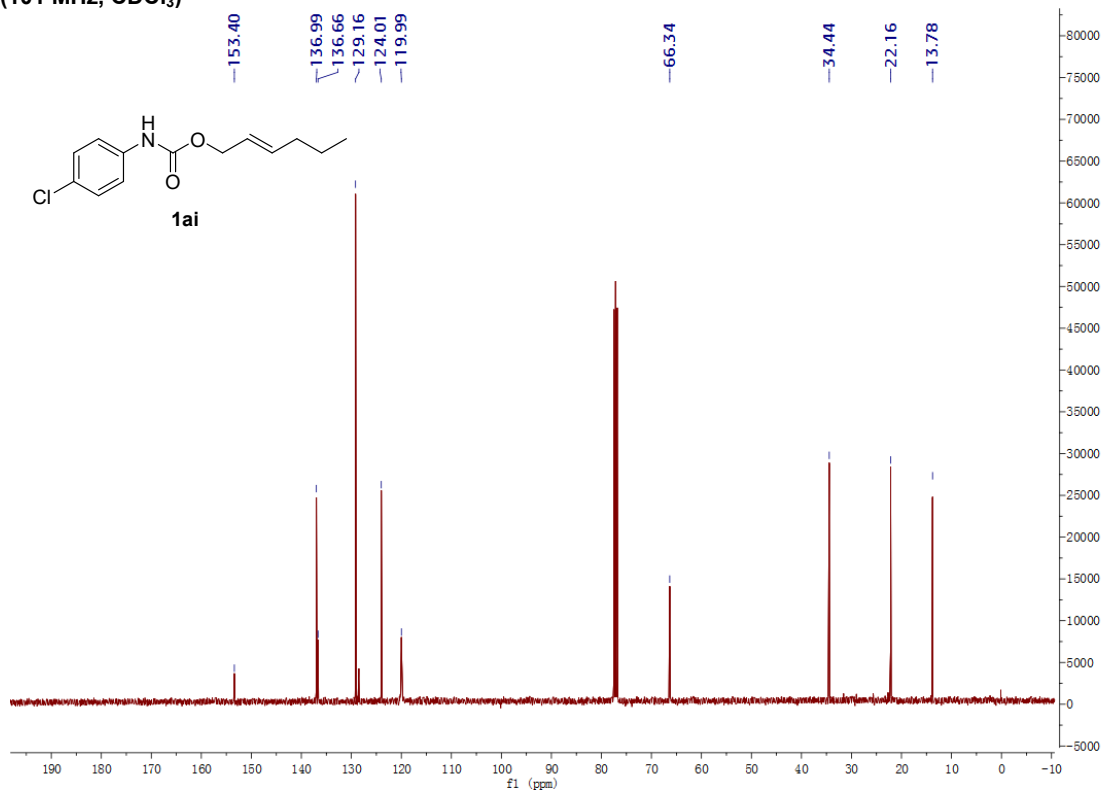

**<sup>1</sup>H-NMR (400 MHz, CDCl<sub>3</sub>)**

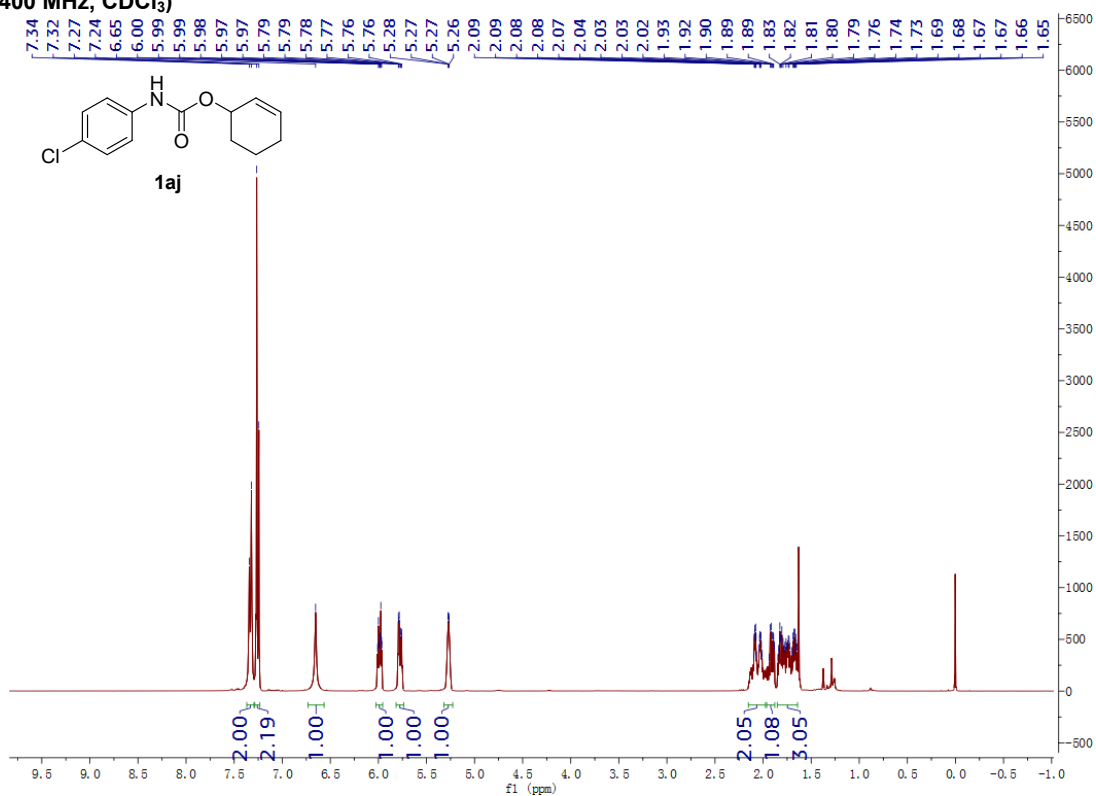

**<sup>13</sup>C-NMR (101 MHz, CDCl<sub>3</sub>)**

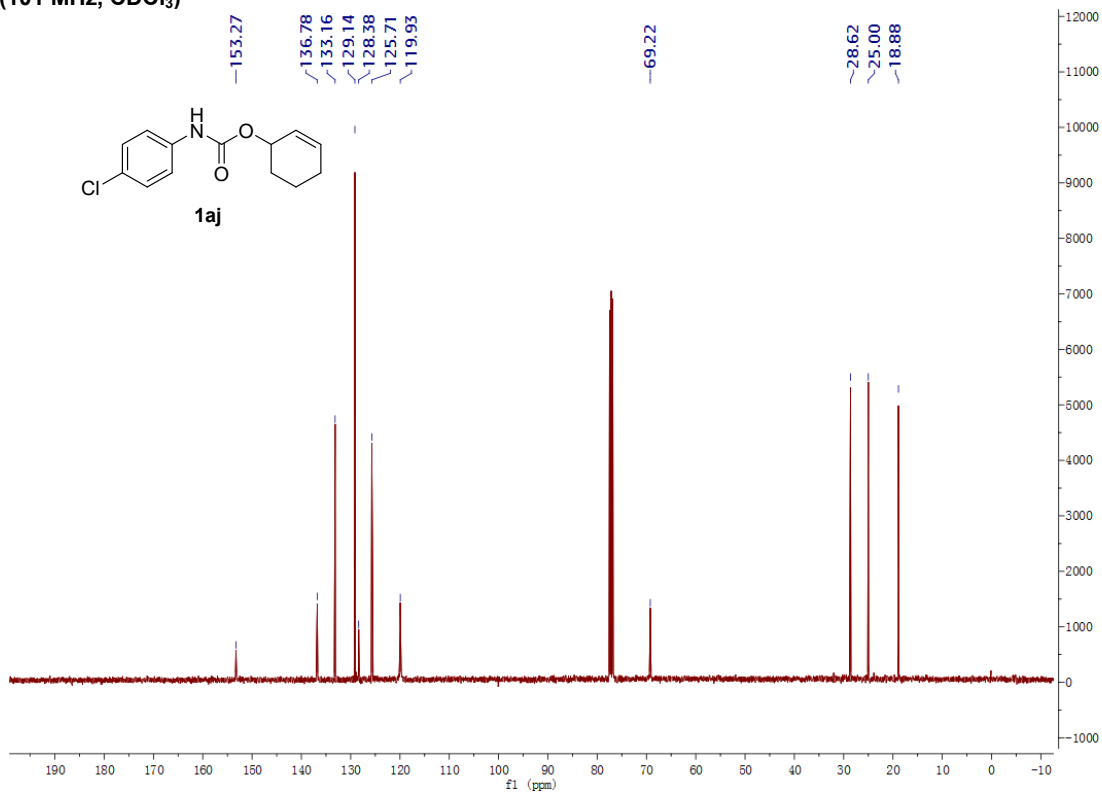

**<sup>1</sup>H-NMR (400 MHz, CDCl<sub>3</sub>)**

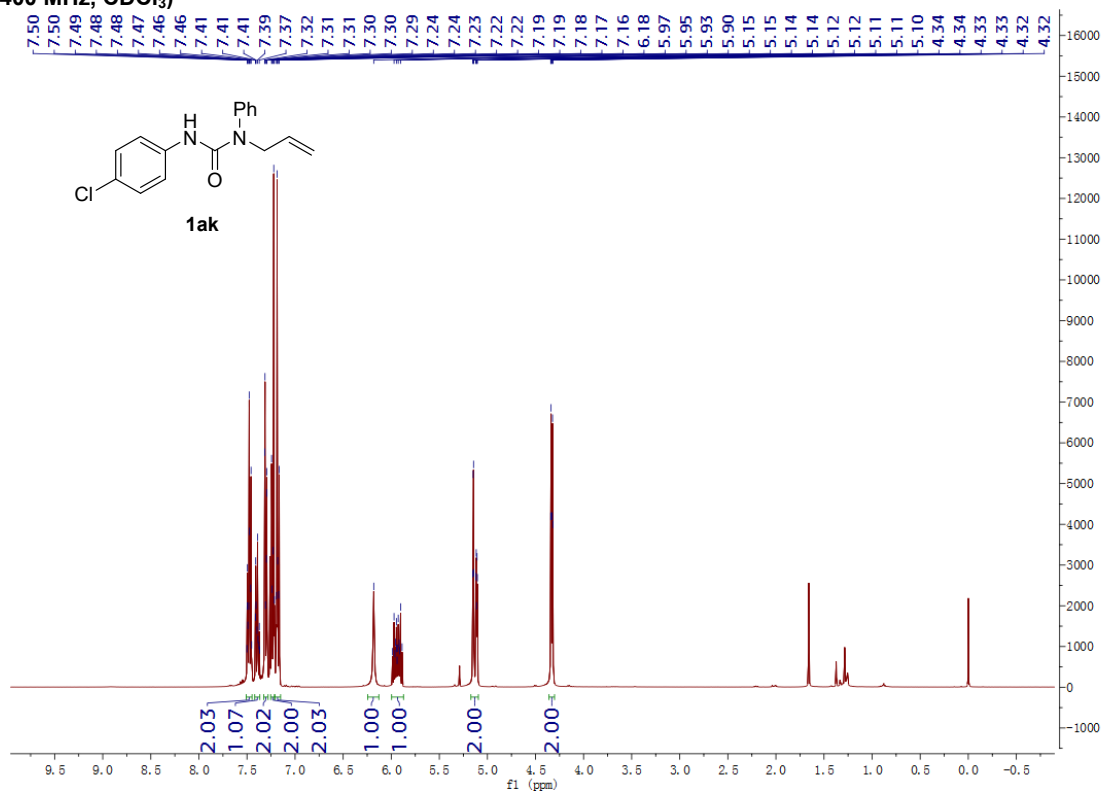

**<sup>13</sup>C-NMR (101 MHz, CDCl<sub>3</sub>)**

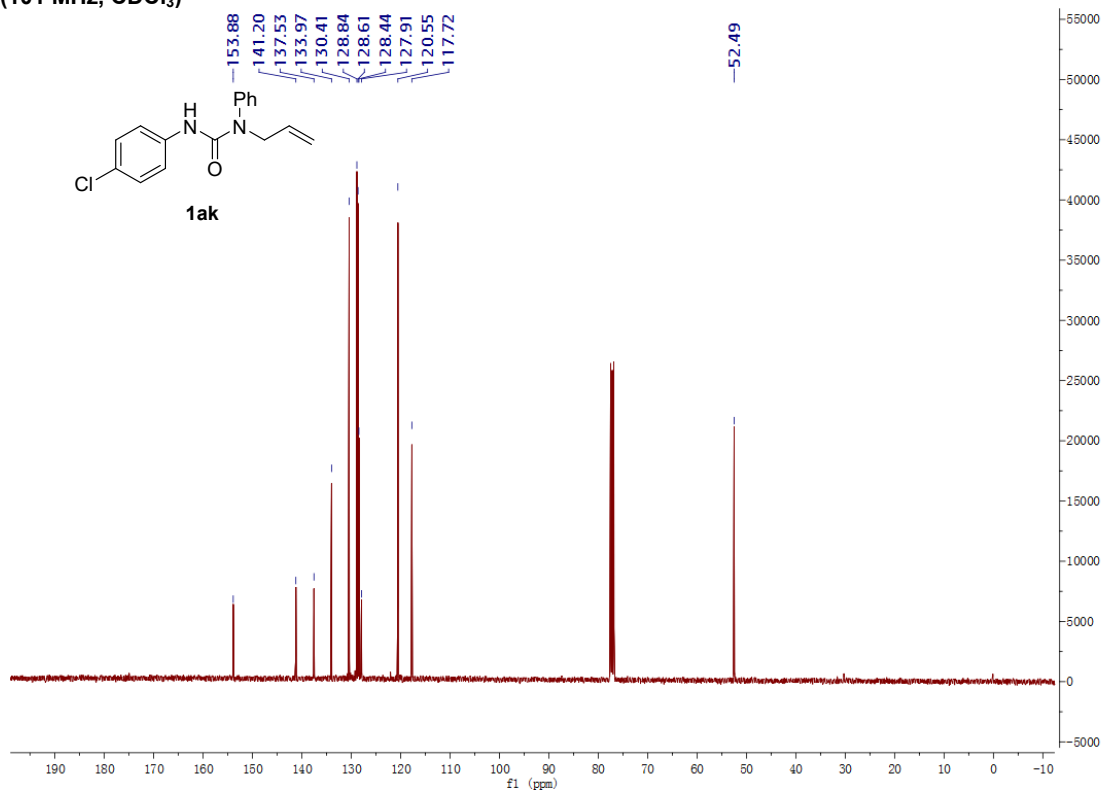

**<sup>1</sup>H-NMR (400 MHz, DMSO-*d*<sub>6</sub>)**

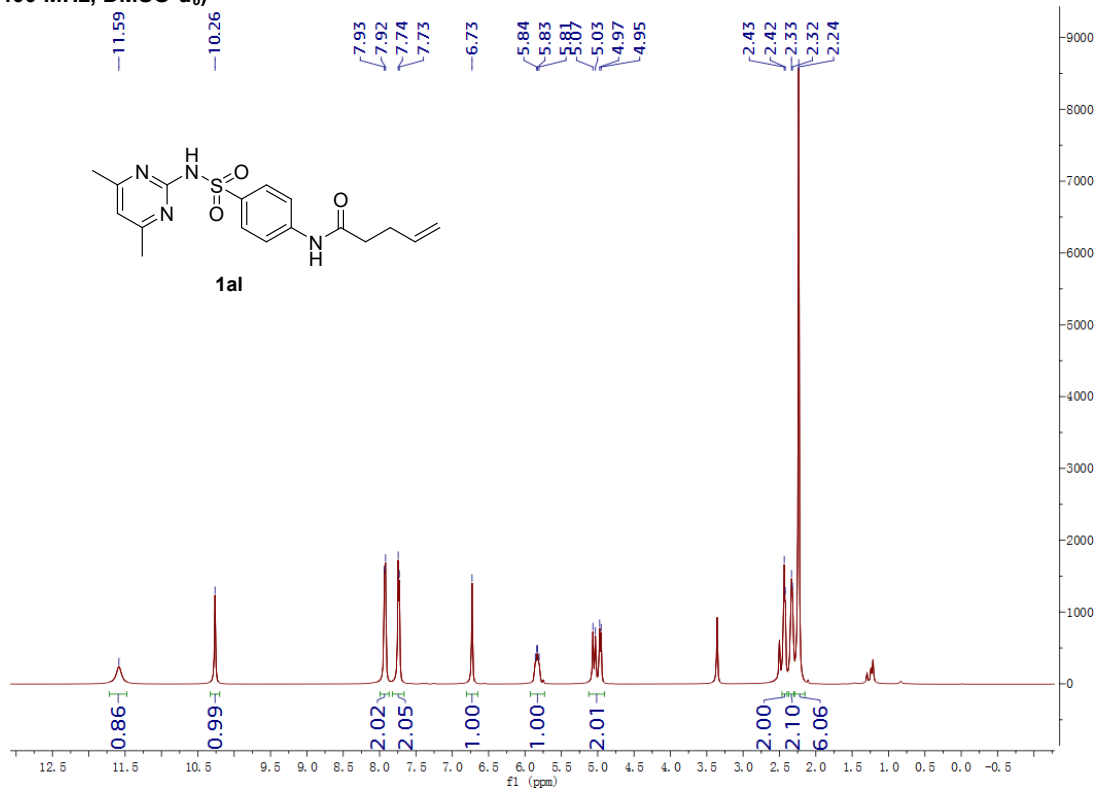

**<sup>13</sup>C-NMR (101 MHz, DMSO-*d*<sub>6</sub>)**

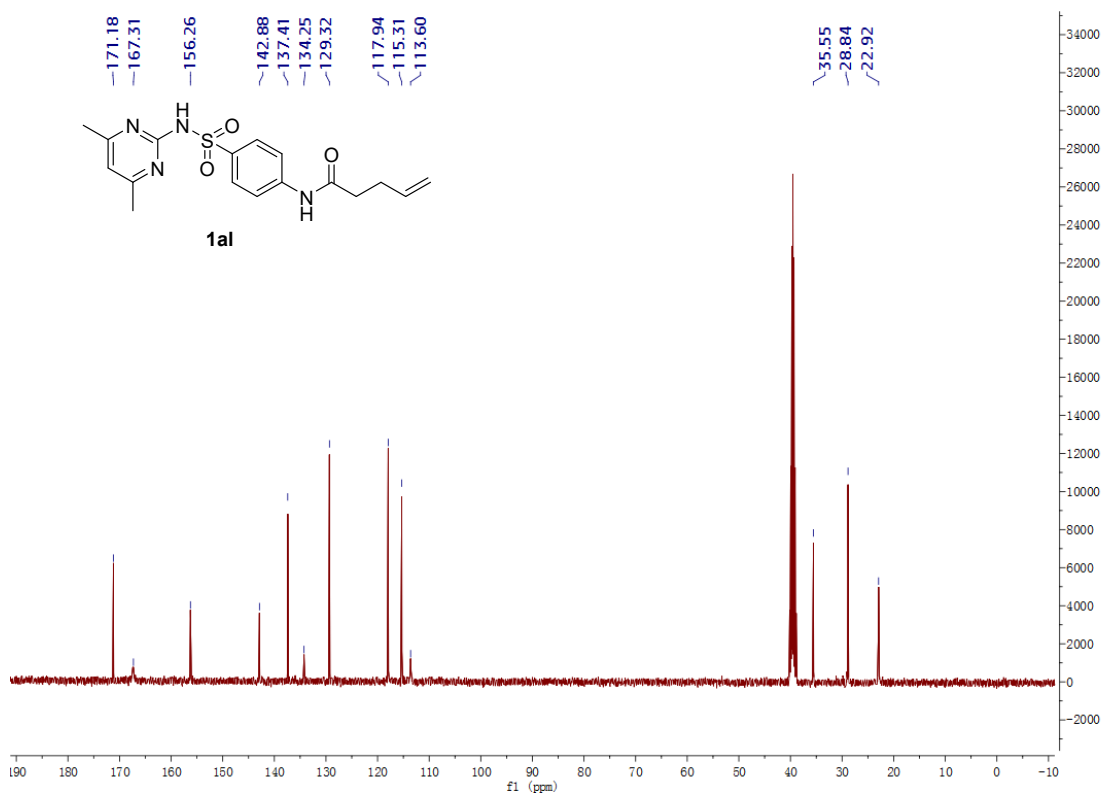

**<sup>1</sup>H-NMR (400 MHz, CDCl<sub>3</sub>)**

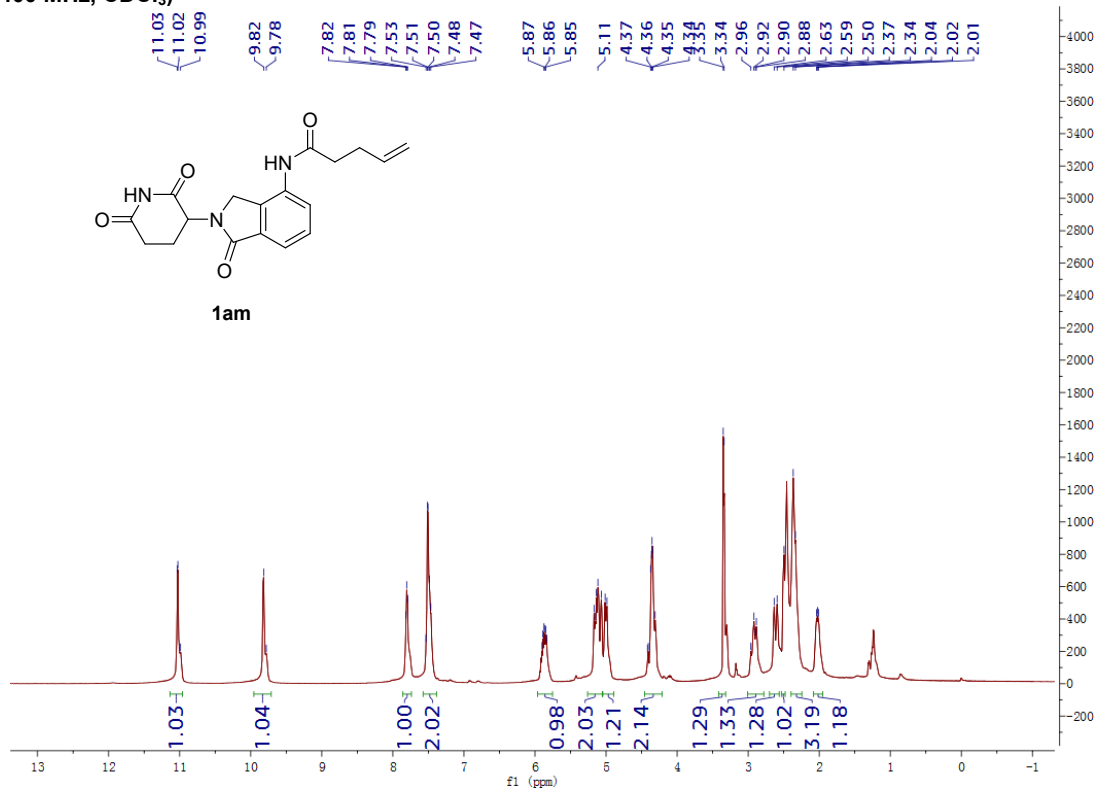

**<sup>13</sup>C-NMR (101 MHz, CDCl<sub>3</sub>)**

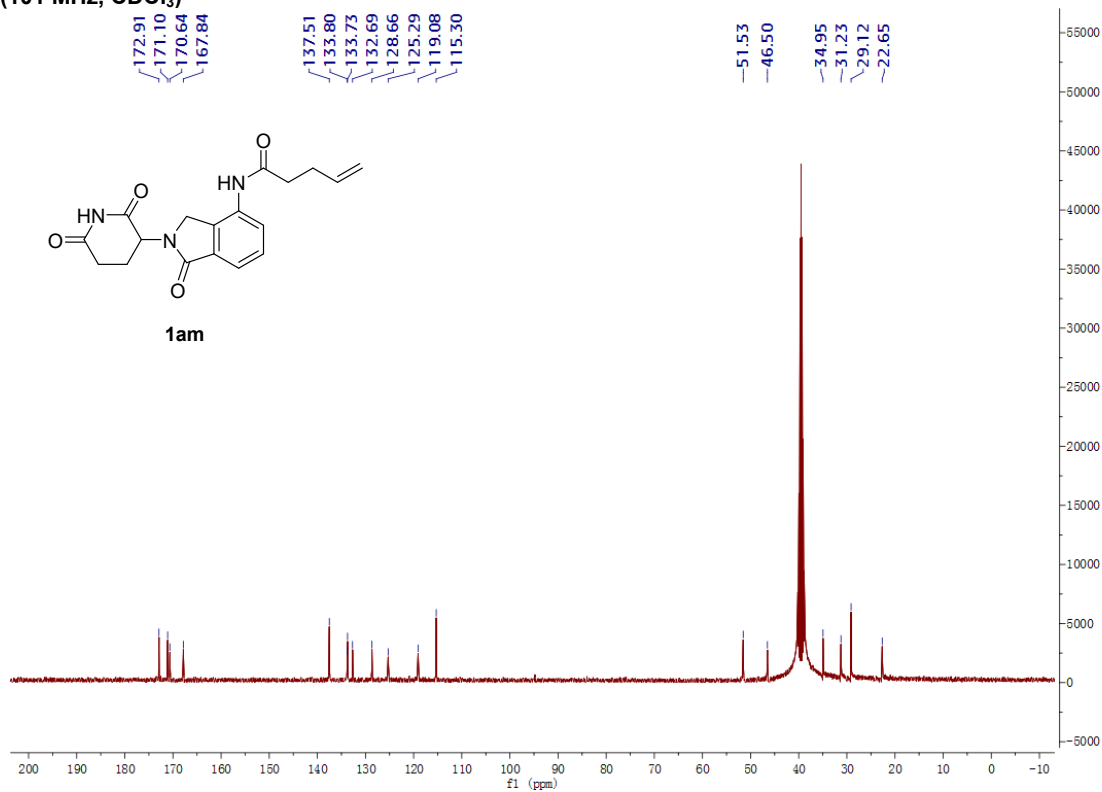

**<sup>1</sup>H-NMR (400 MHz, CDCl<sub>3</sub>)**

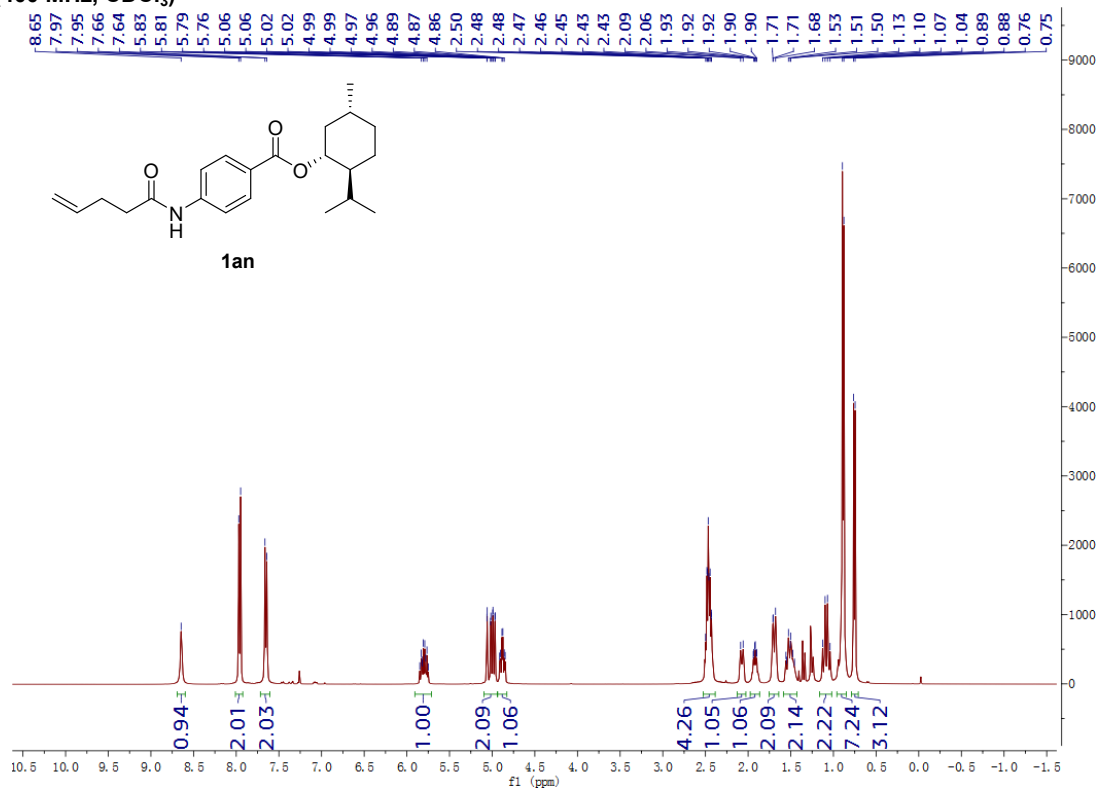

**<sup>13</sup>C-NMR (101 MHz, CDCl<sub>3</sub>)**

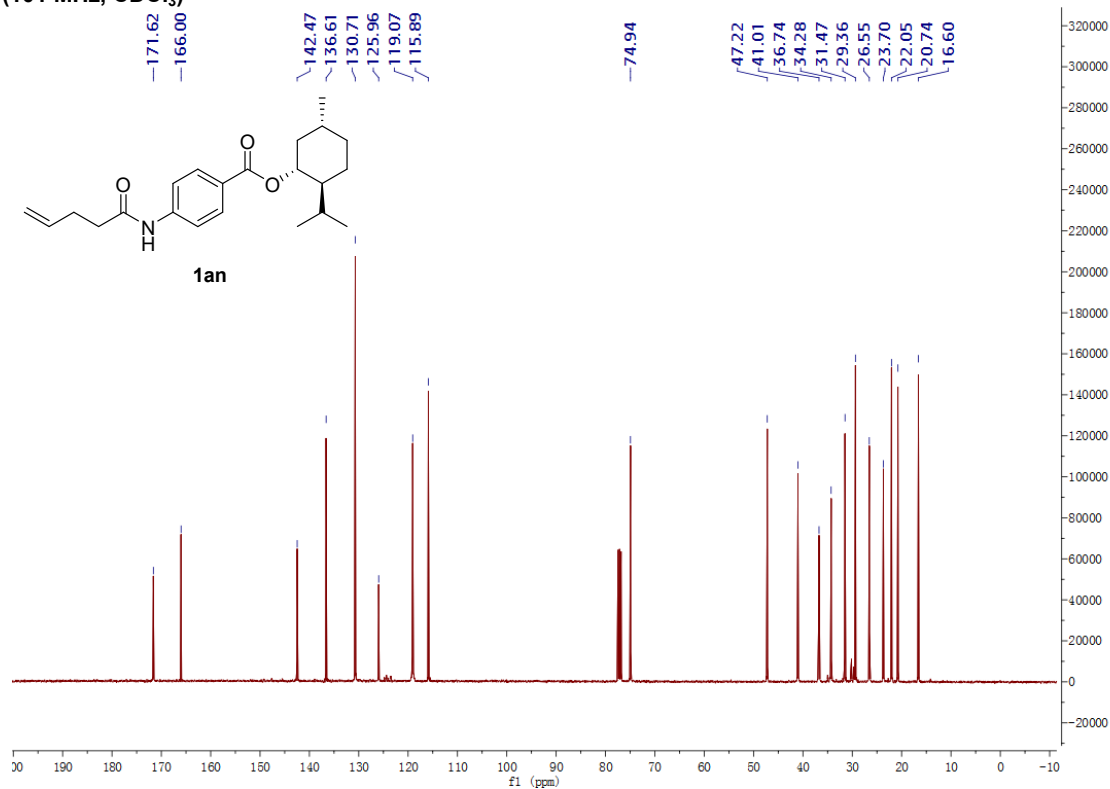



**<sup>1</sup>H-NMR (400 MHz, CDCl<sub>3</sub>)**

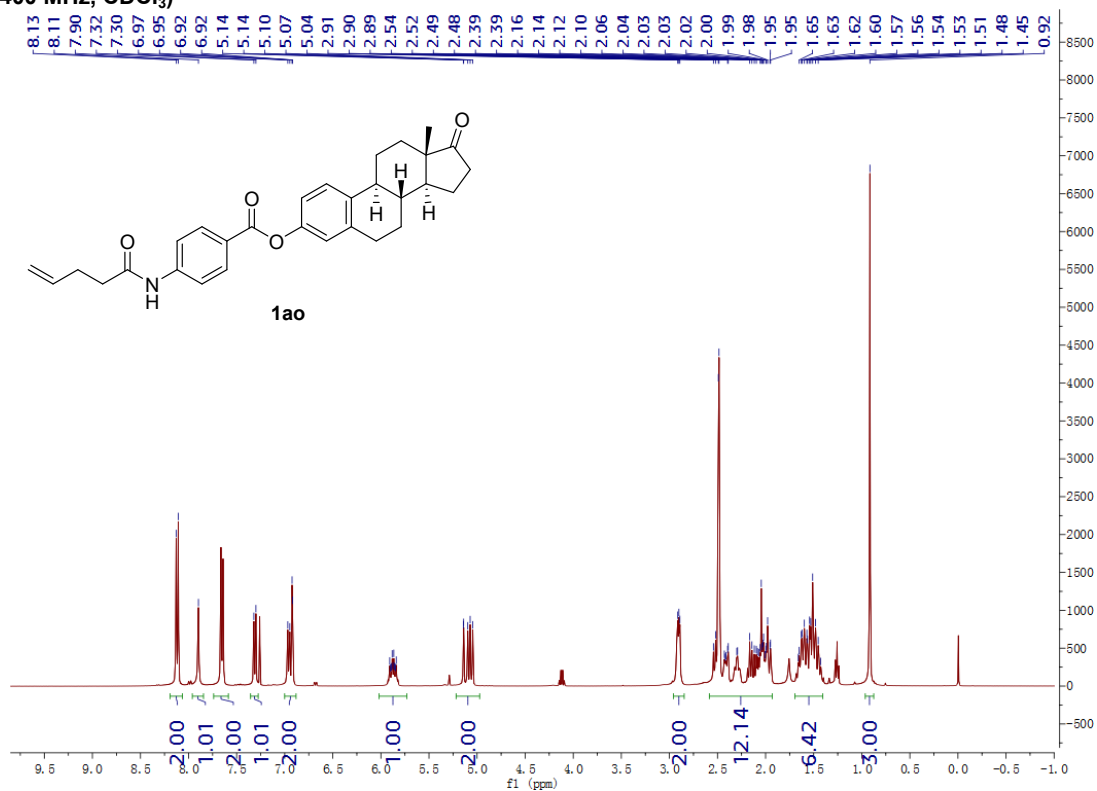

**<sup>13</sup>C-NMR (101 MHz, CDCl<sub>3</sub>)**

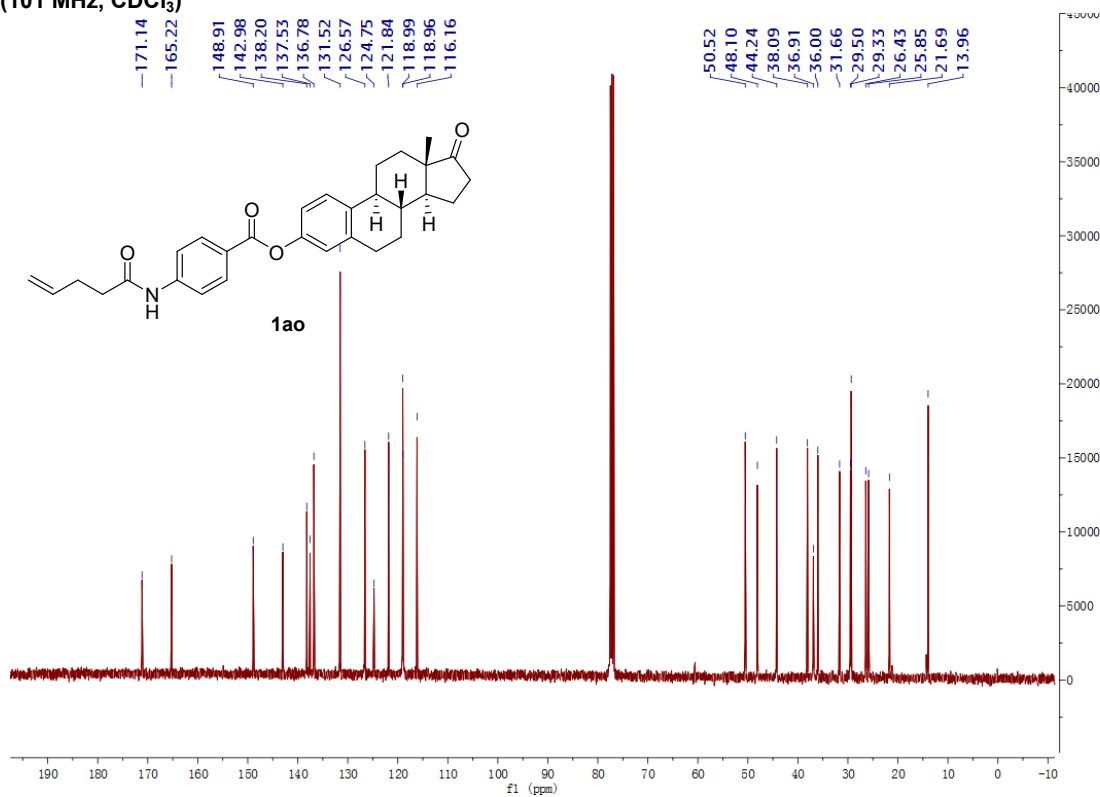

**<sup>1</sup>H-NMR (400 MHz, CDCl<sub>3</sub>)**

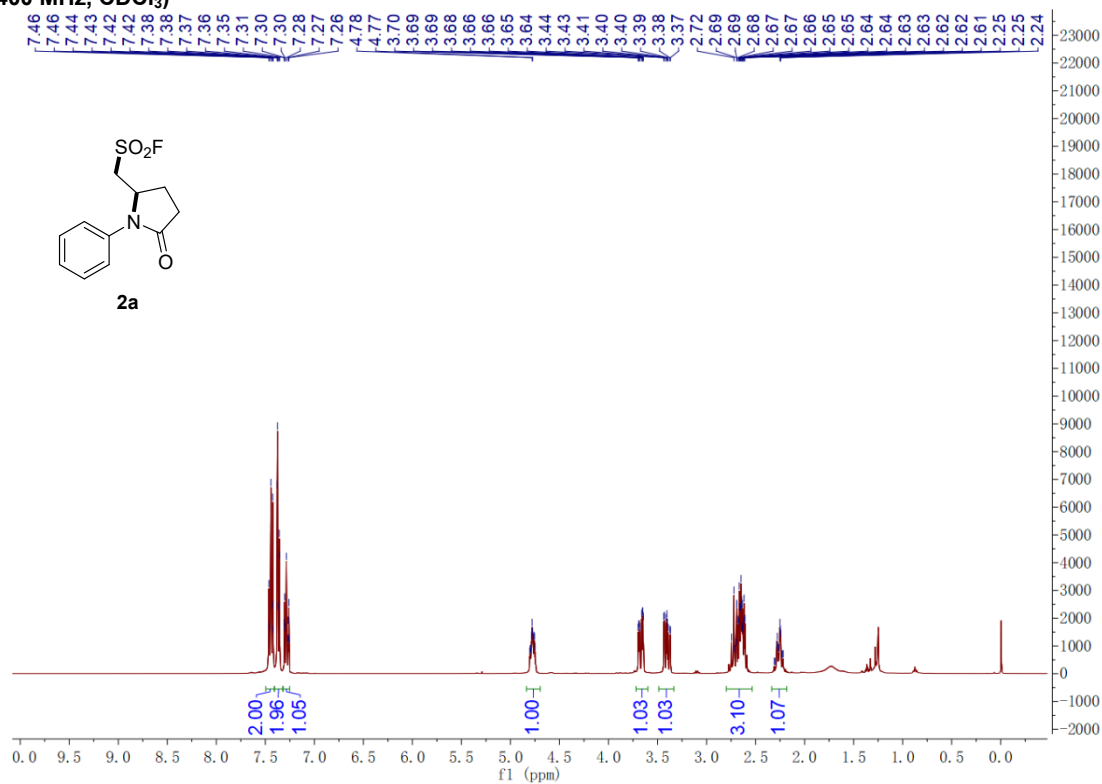

**<sup>13</sup>C-NMR (101 MHz, CDCl<sub>3</sub>)**

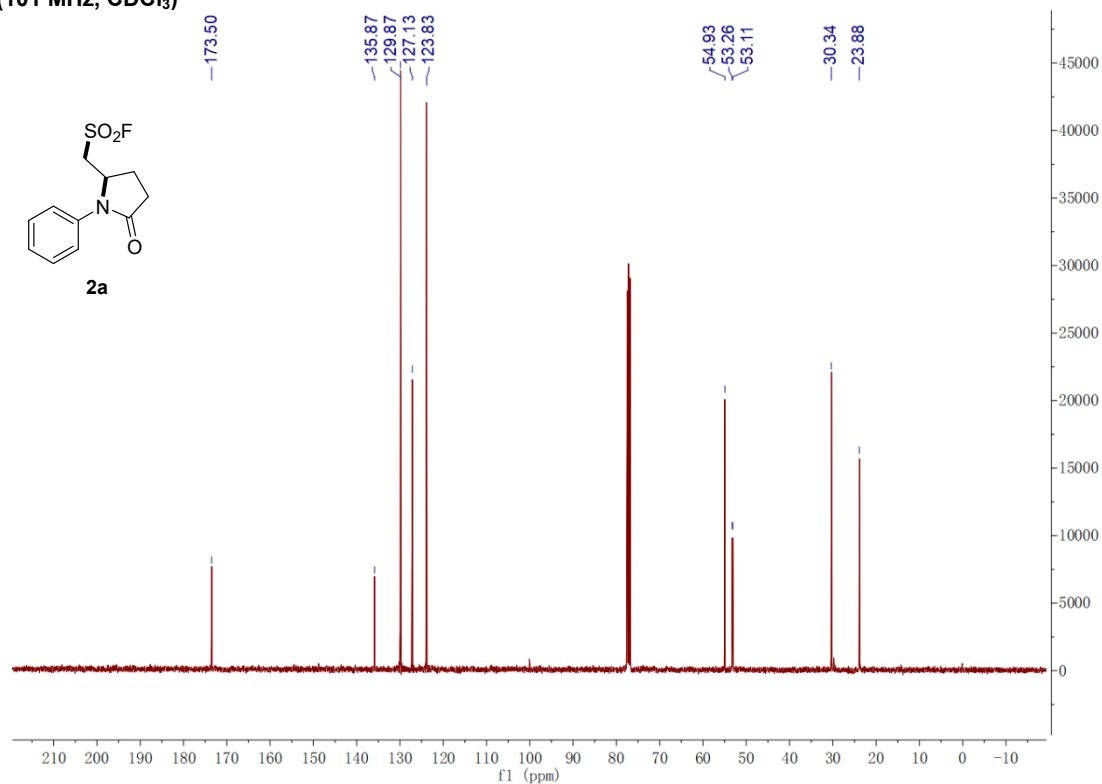

**<sup>19</sup>F-NMR (376 MHz, CDCl<sub>3</sub>)**

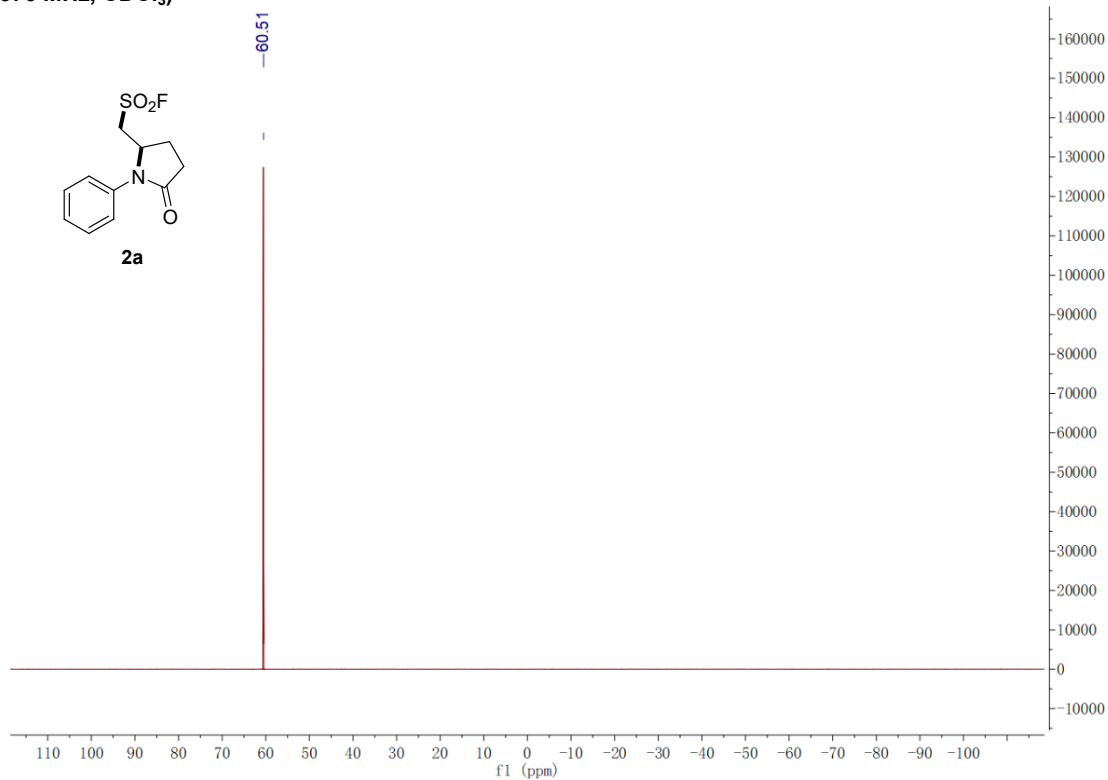

**<sup>1</sup>H-NMR (400 MHz, CDCl<sub>3</sub>)**

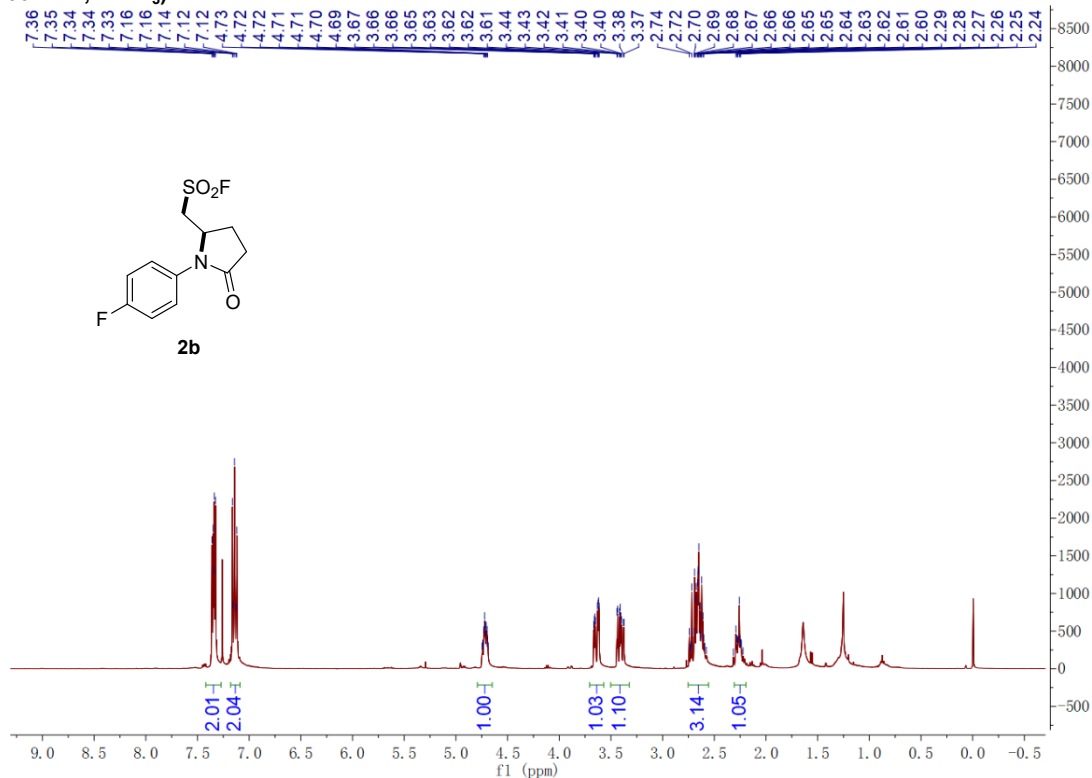

**<sup>13</sup>C-NMR (101 MHz, CDCl<sub>3</sub>)**

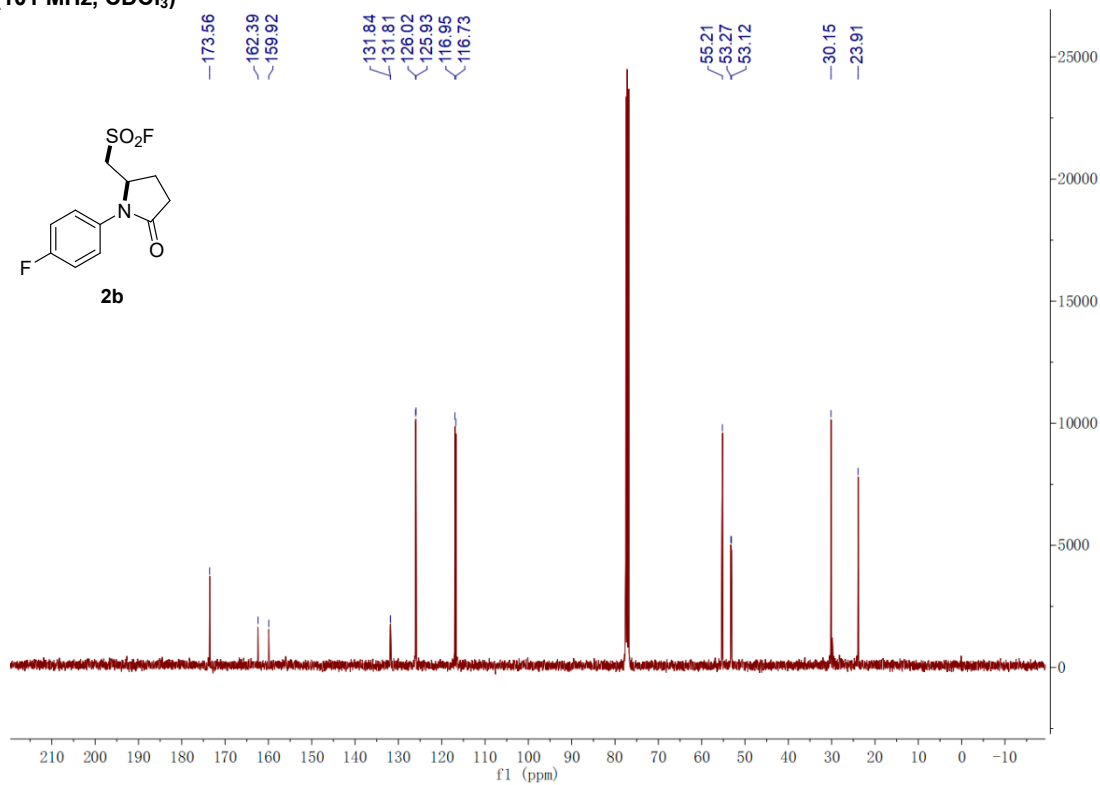

**<sup>19</sup>F NMR (376 MHz, CDCl<sub>3</sub>)**

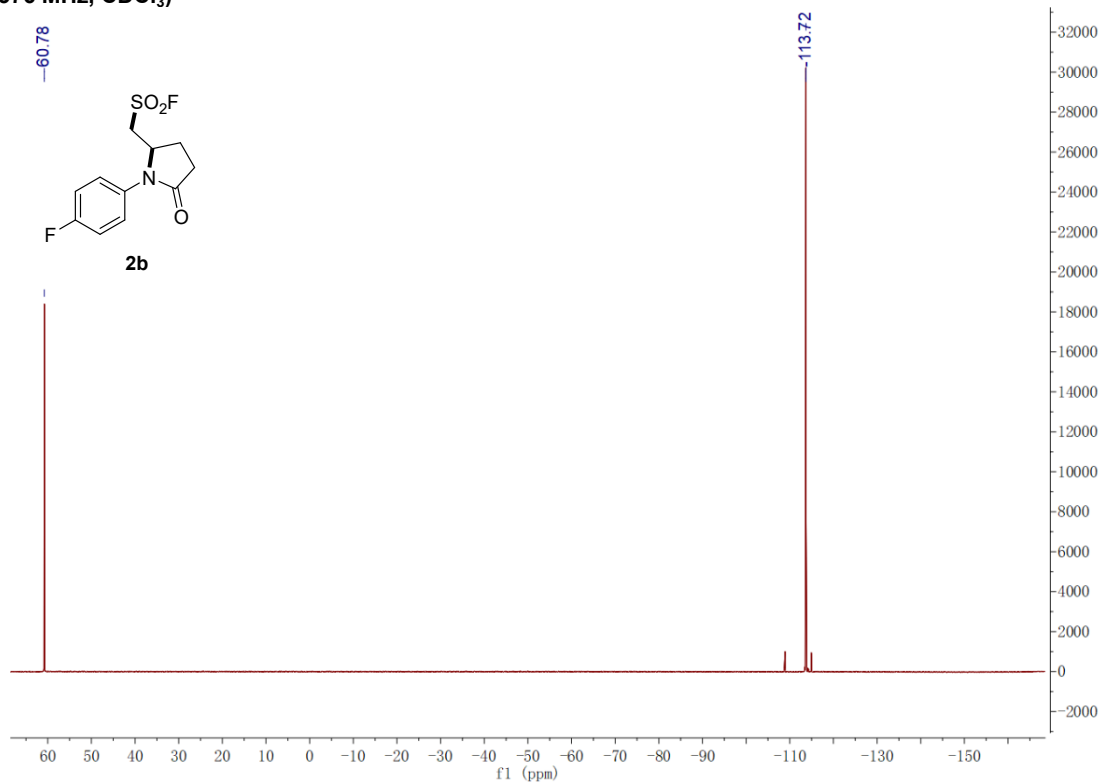

**<sup>1</sup>H-NMR (400 MHz, CDCl<sub>3</sub>)**

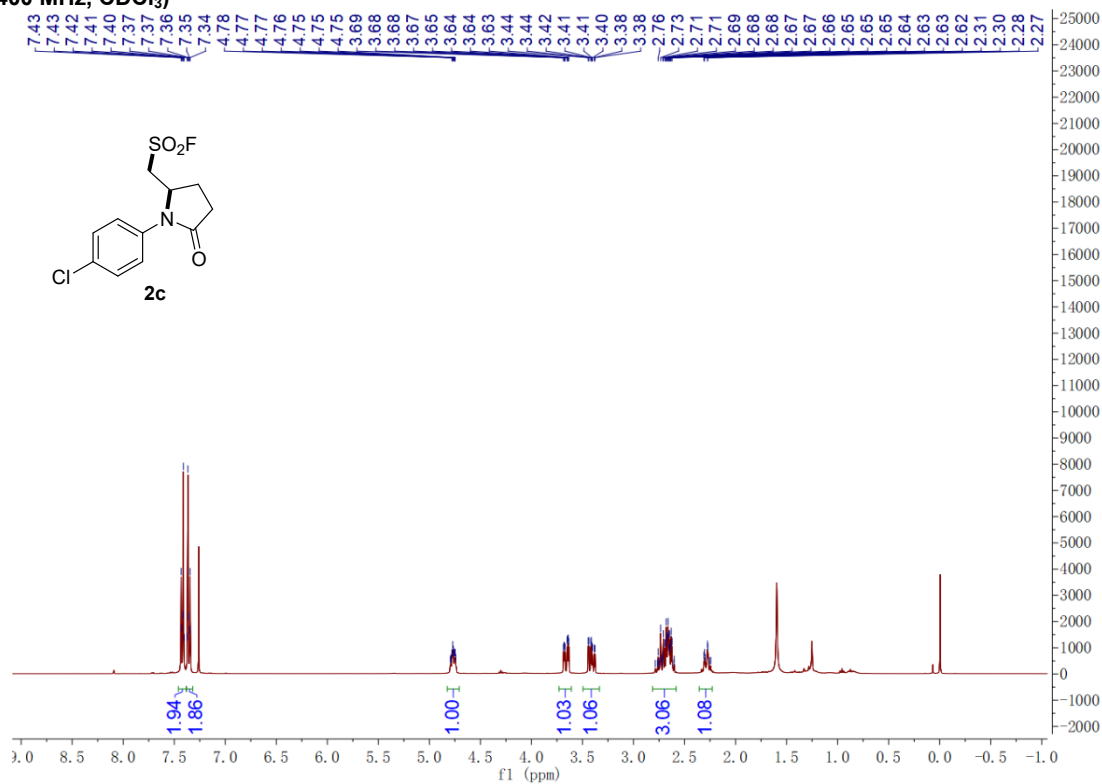

**<sup>13</sup>C-NMR (101 MHz, CDCl<sub>3</sub>)**

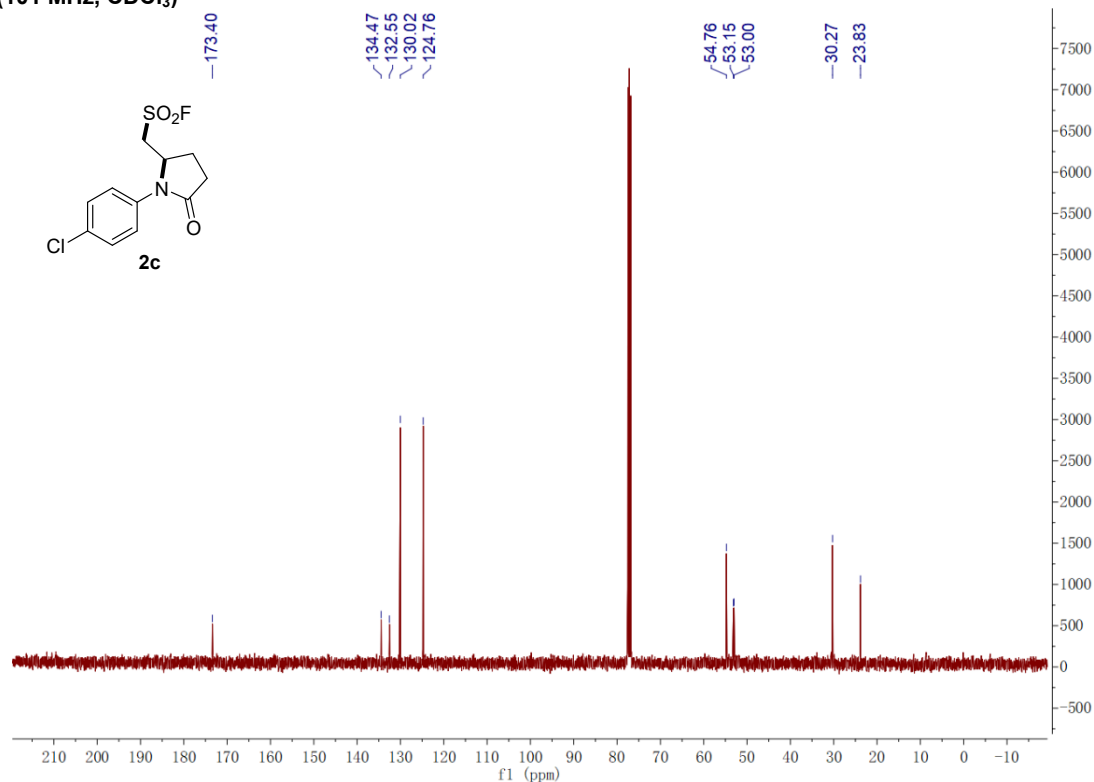

**$^{19}\text{F}$  NMR (376 MHz,  $\text{CDCl}_3$ )**

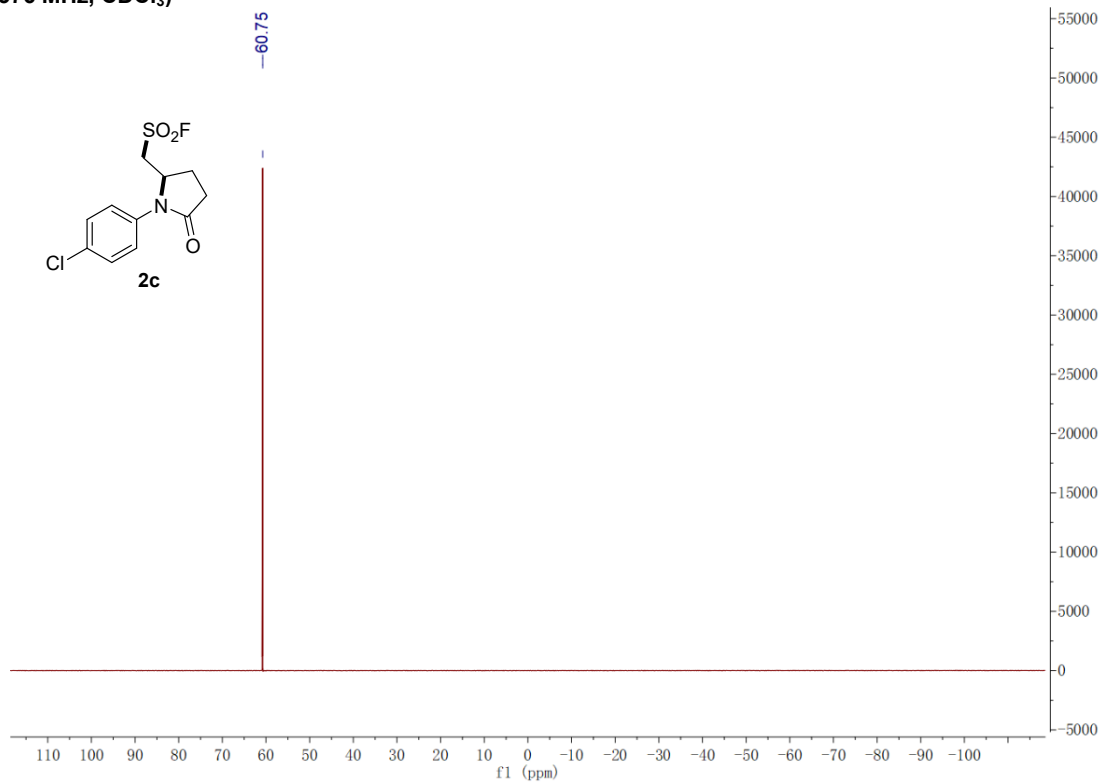

**$^1\text{H}$ -NMR (400 MHz,  $\text{CDCl}_3$ )**

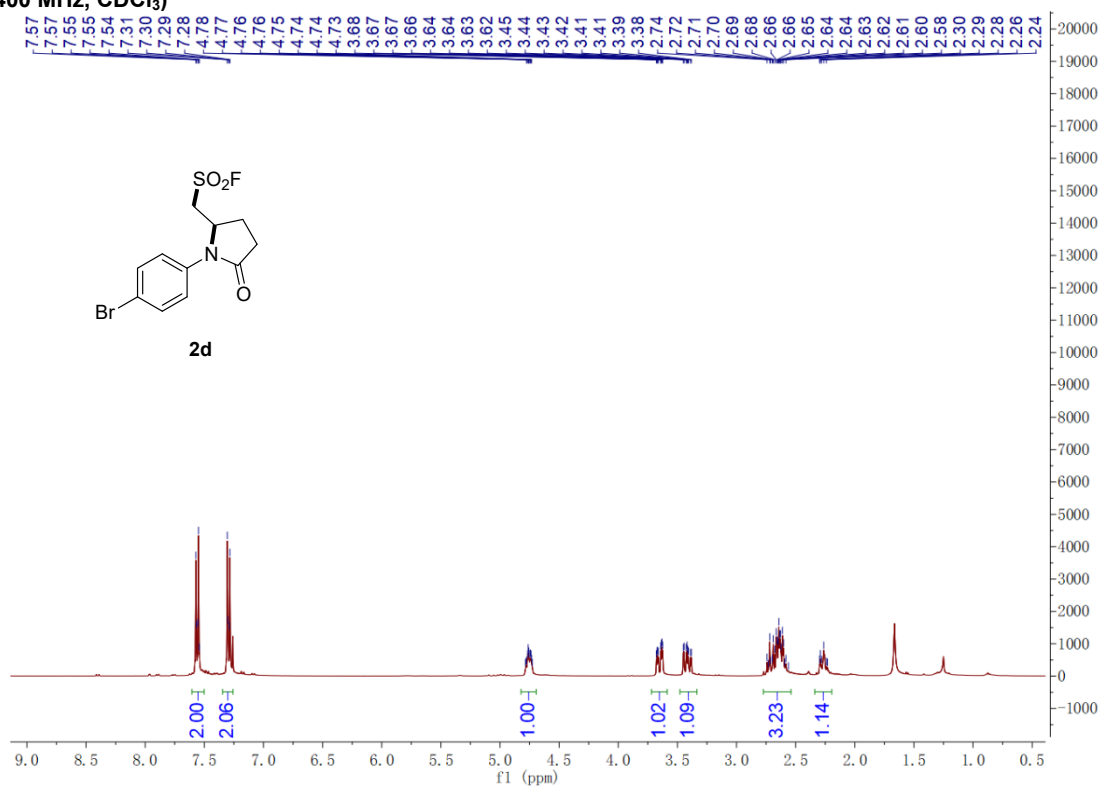

**<sup>13</sup>C-NMR (126 MHz, CDCl<sub>3</sub>)**

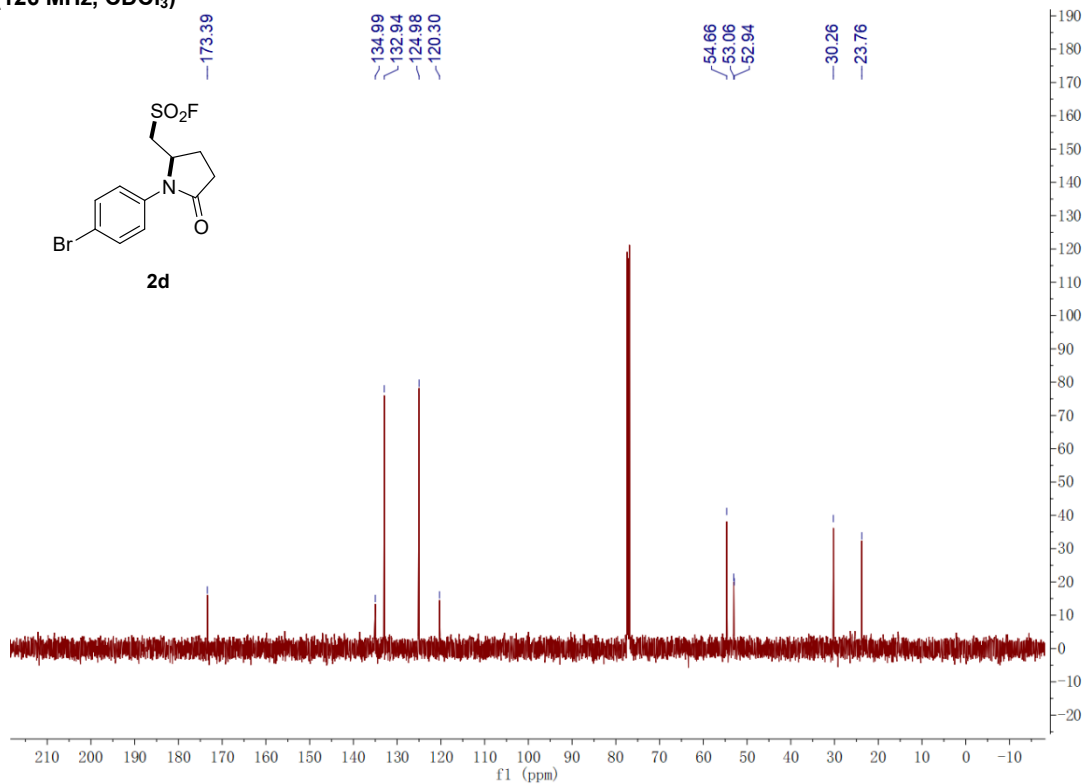

**<sup>19</sup>F NMR (376 MHz, CDCl<sub>3</sub>)**

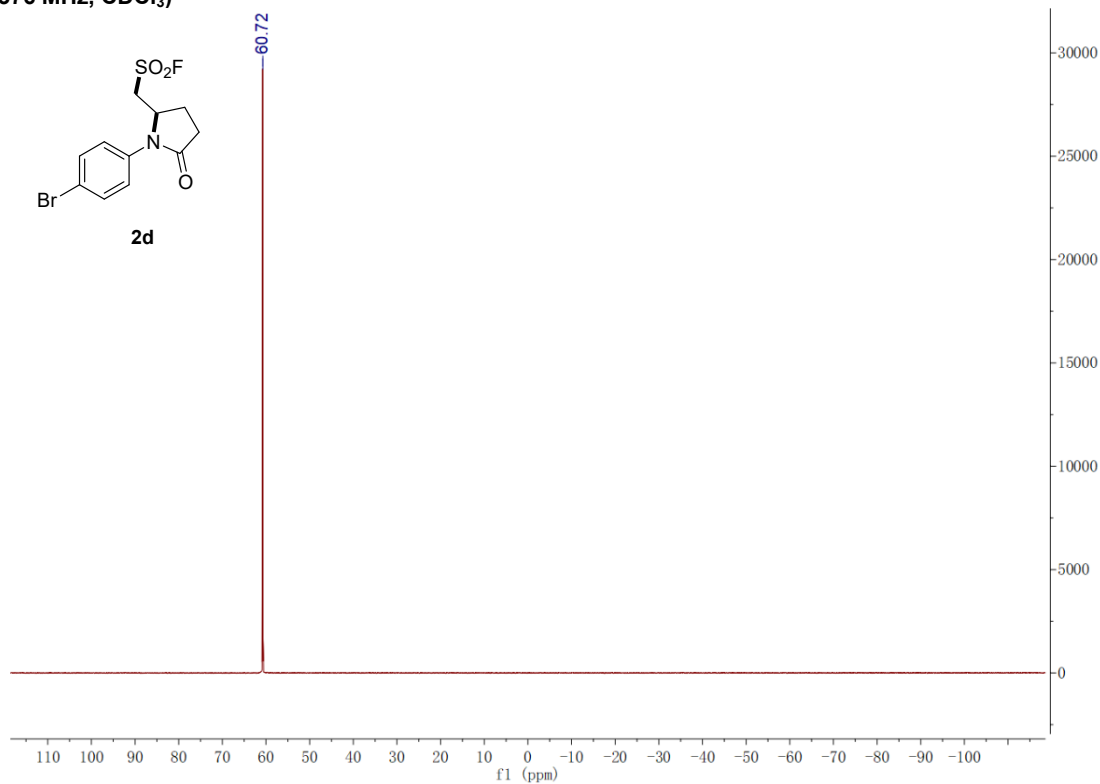

**<sup>1</sup>H-NMR (400 MHz, CDCl<sub>3</sub>)**

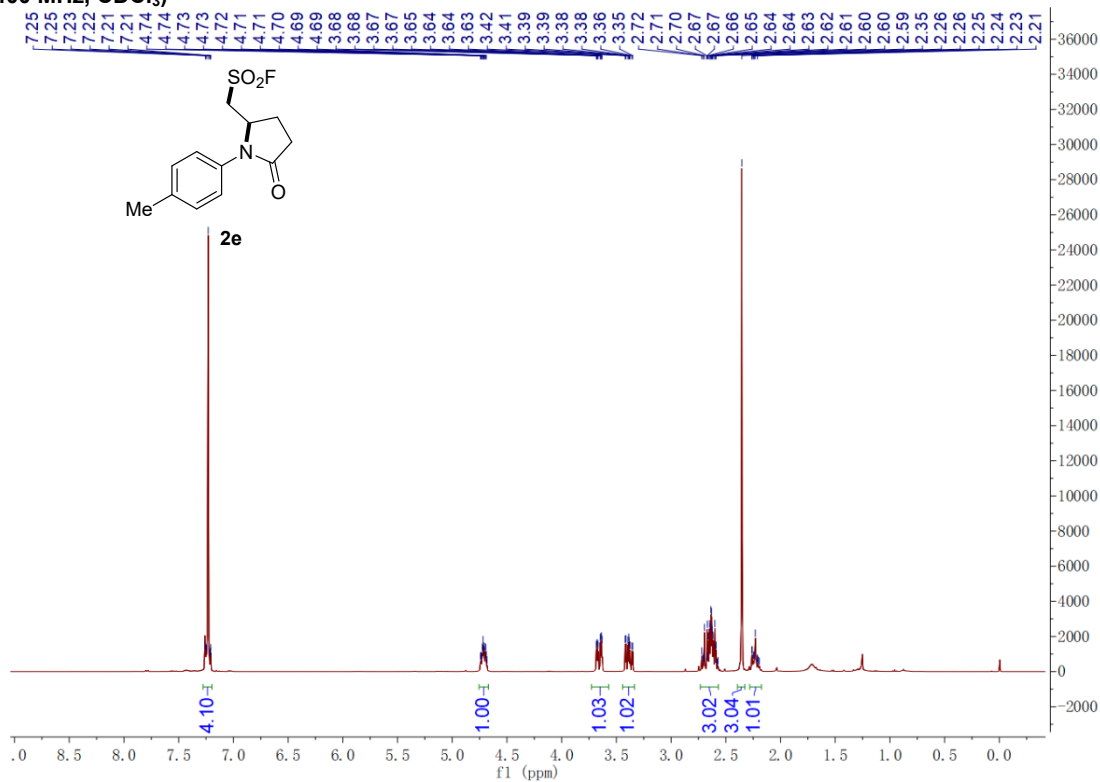

**<sup>13</sup>C-NMR (101 MHz, CDCl<sub>3</sub>)**

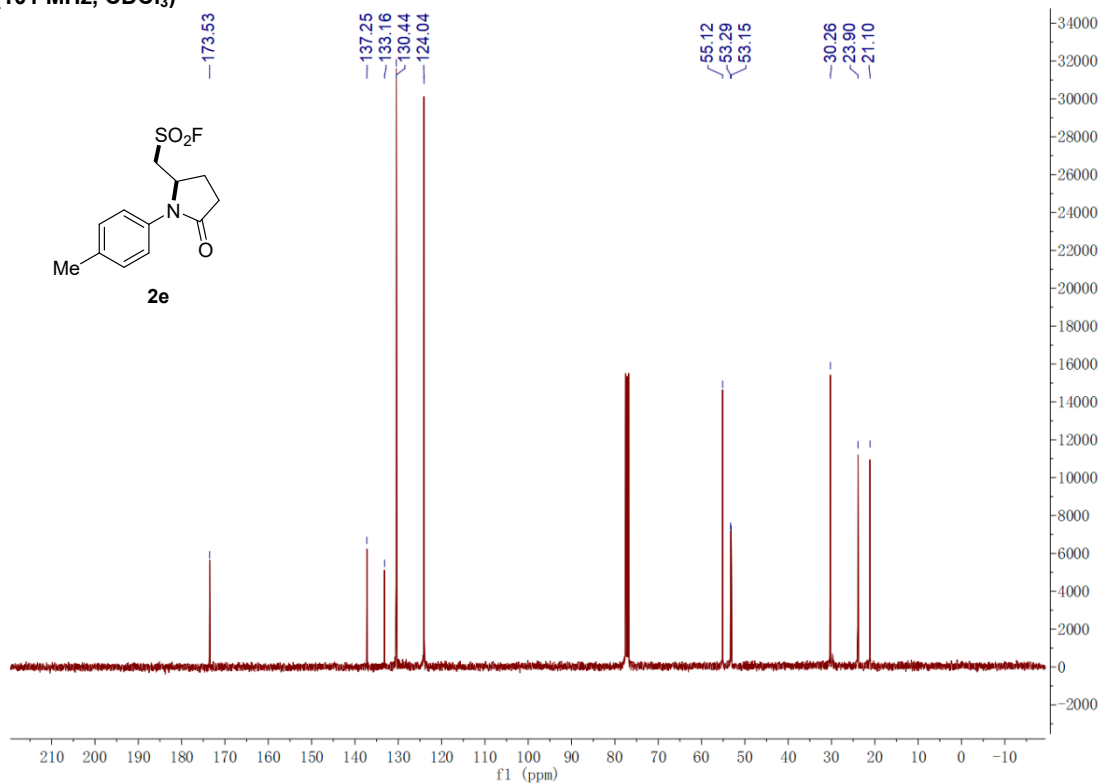



**<sup>19</sup>F NMR (376 MHz, CDCl<sub>3</sub>)**

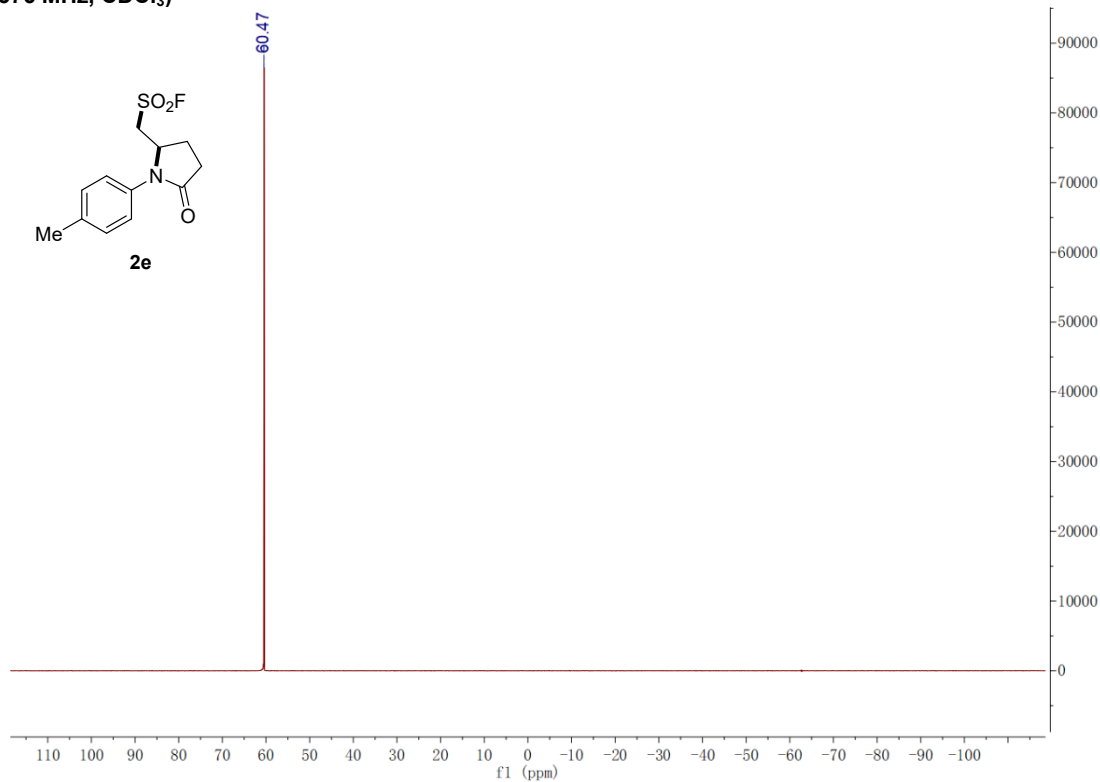

**<sup>1</sup>H-NMR (400 MHz, CDCl<sub>3</sub>)**

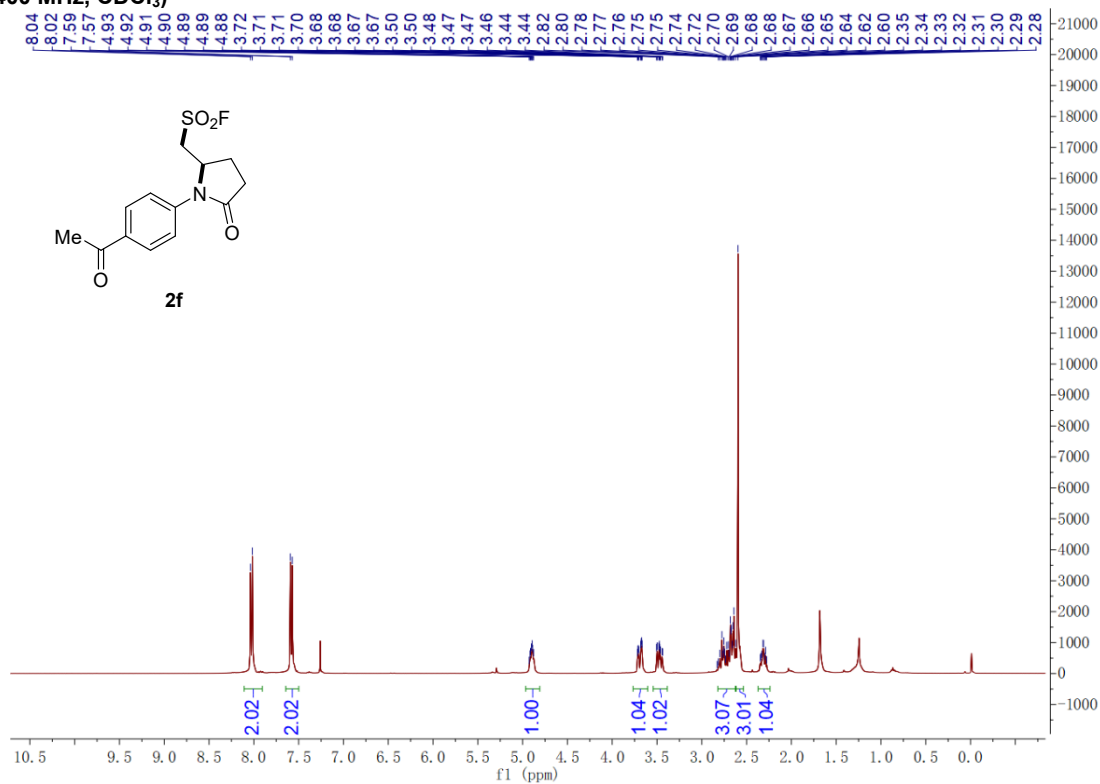

**<sup>13</sup>C-NMR (126 MHz, CDCl<sub>3</sub>)**

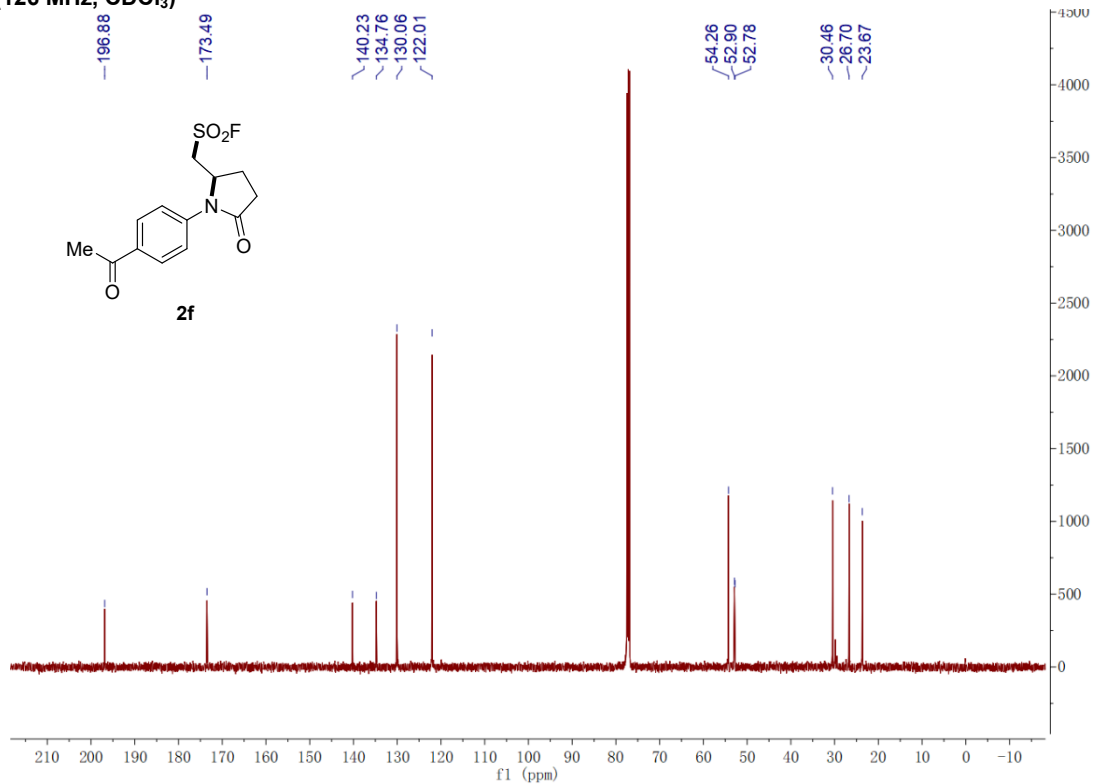

**<sup>19</sup>F NMR (376 MHz, CDCl<sub>3</sub>)**

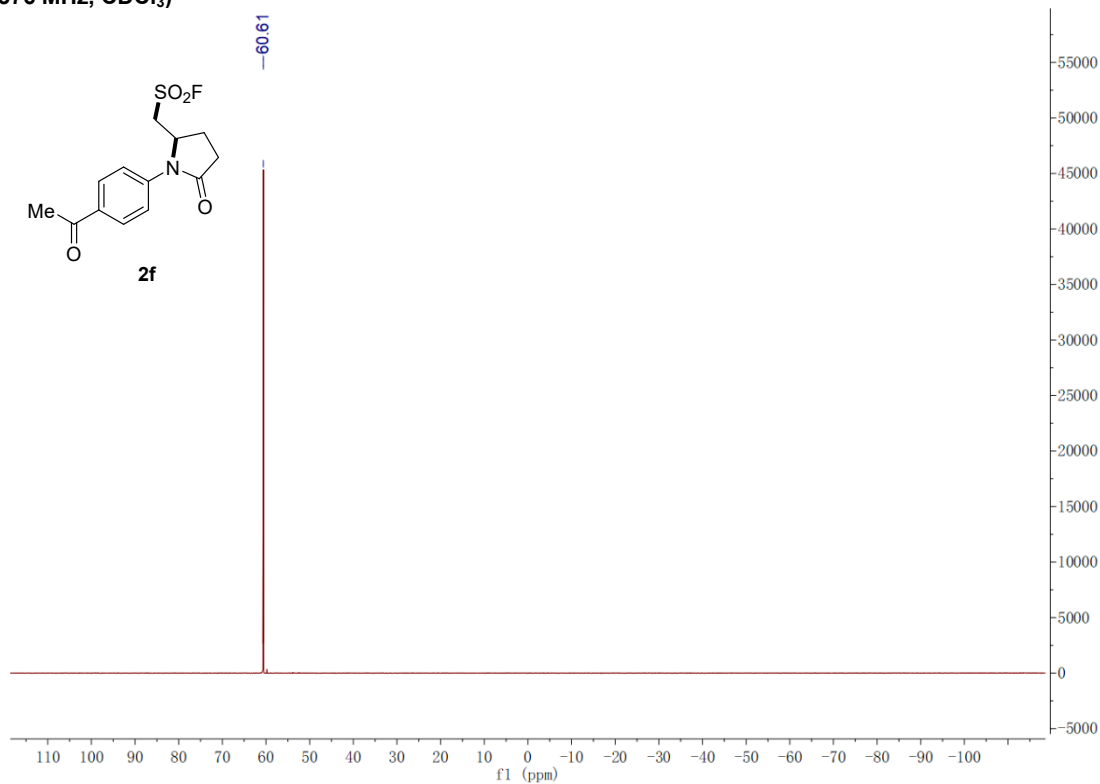

**<sup>1</sup>H-NMR (400 MHz, CDCl<sub>3</sub>)**

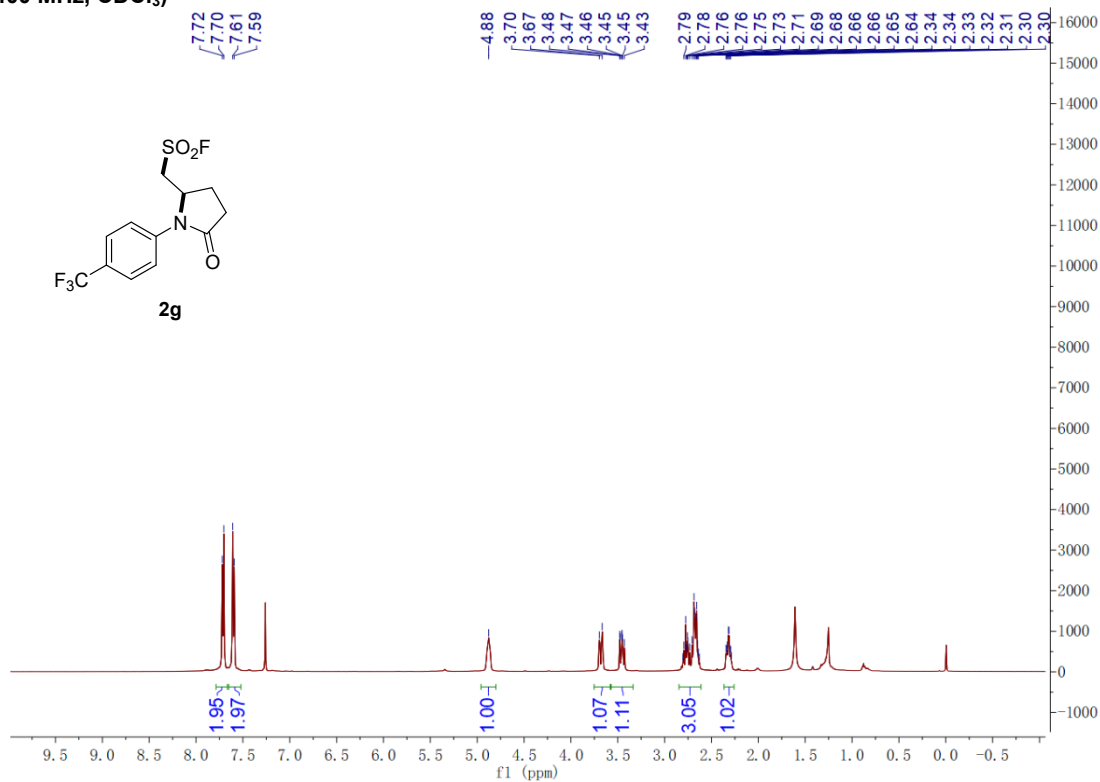

**<sup>13</sup>C-NMR (101 MHz, CDCl<sub>3</sub>)**

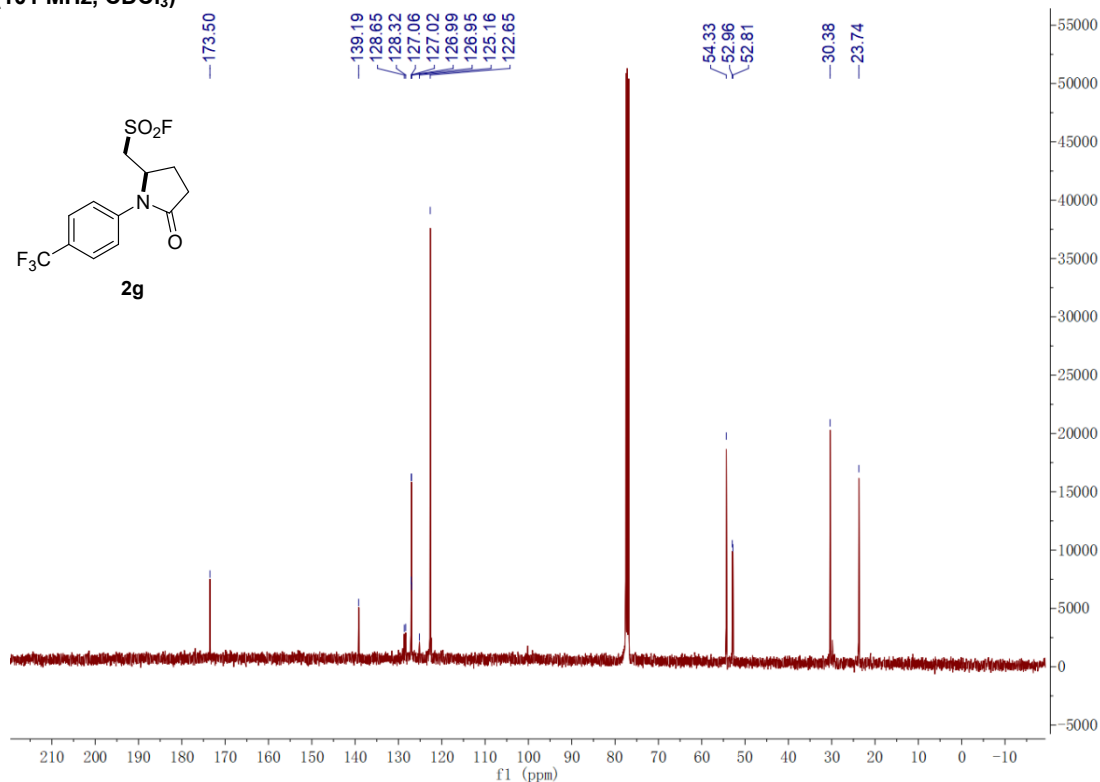

**<sup>19</sup>F NMR (376 MHz, CDCl<sub>3</sub>)**

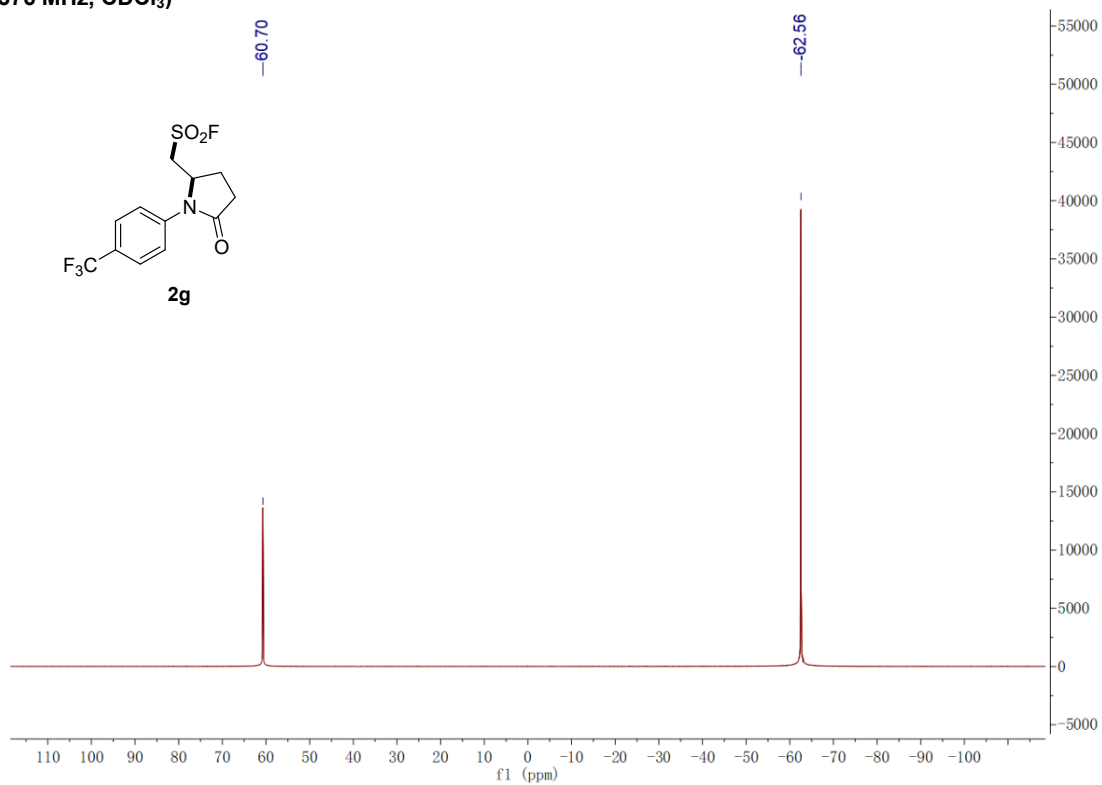

**<sup>1</sup>H-NMR (400 MHz, CDCl<sub>3</sub>)**

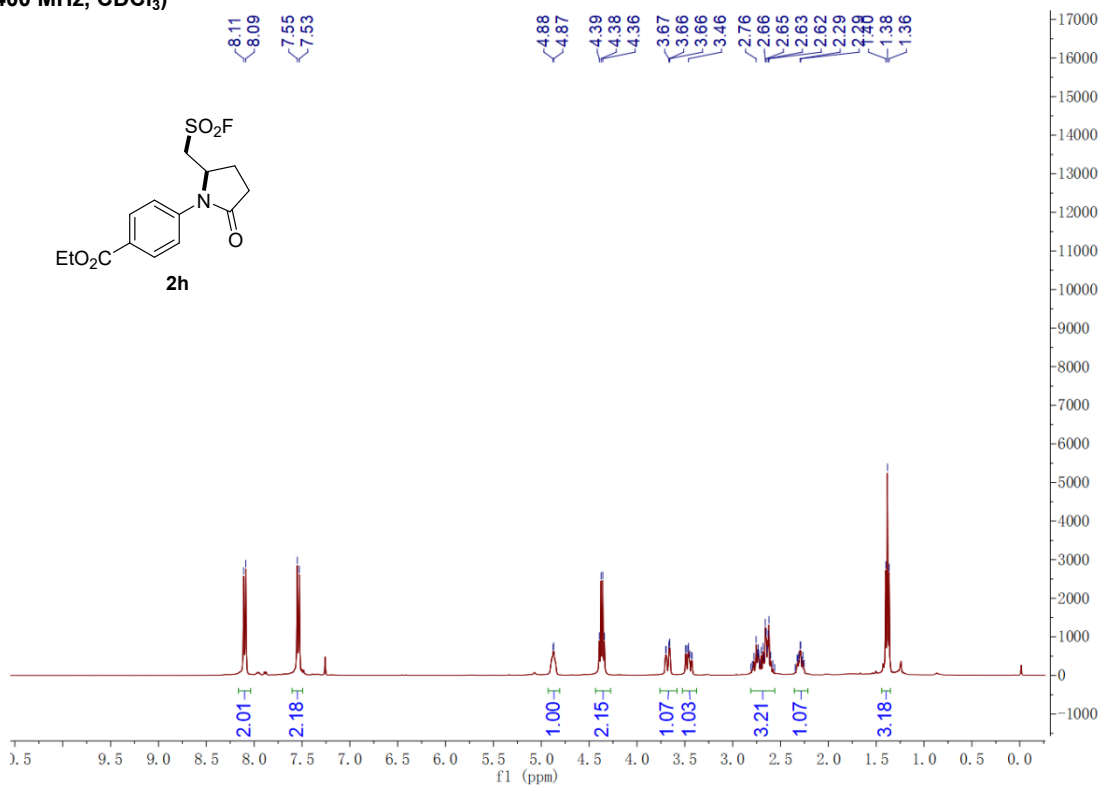

**<sup>13</sup>C-NMR (101 MHz, CDCl<sub>3</sub>)**

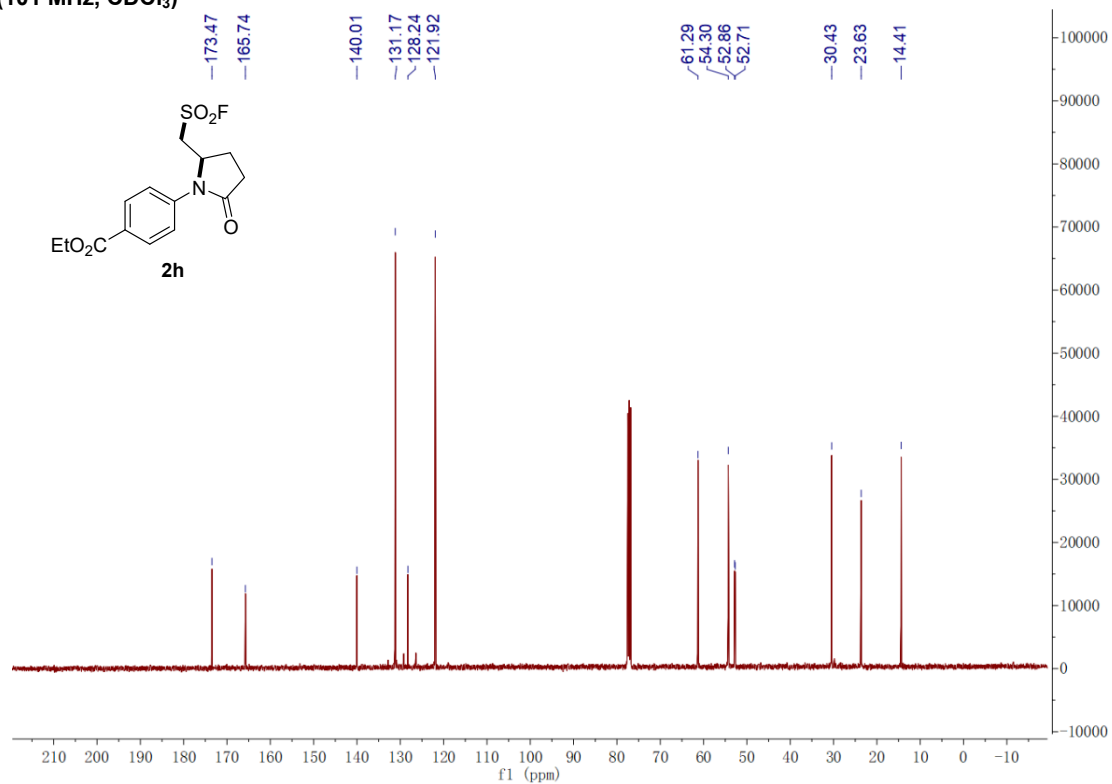

**<sup>19</sup>F NMR (376 MHz, CDCl<sub>3</sub>)**

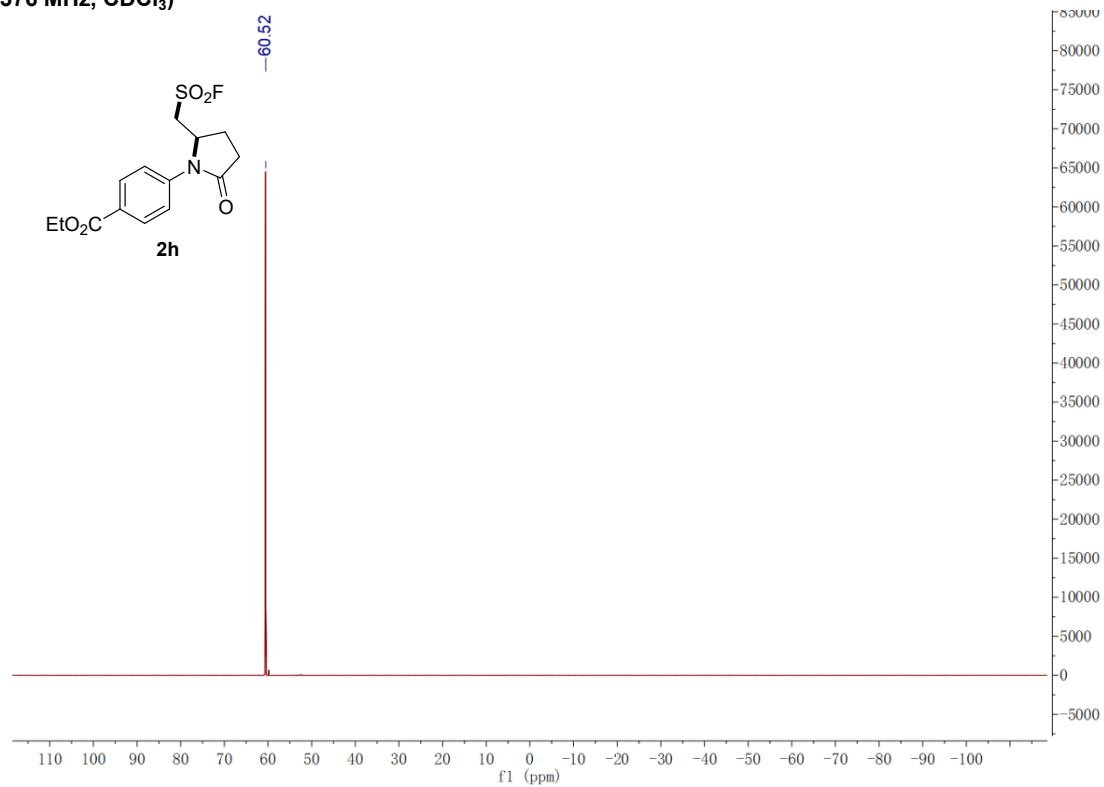

**<sup>1</sup>H-NMR (400 MHz, DMSO-*d*<sub>6</sub>)**

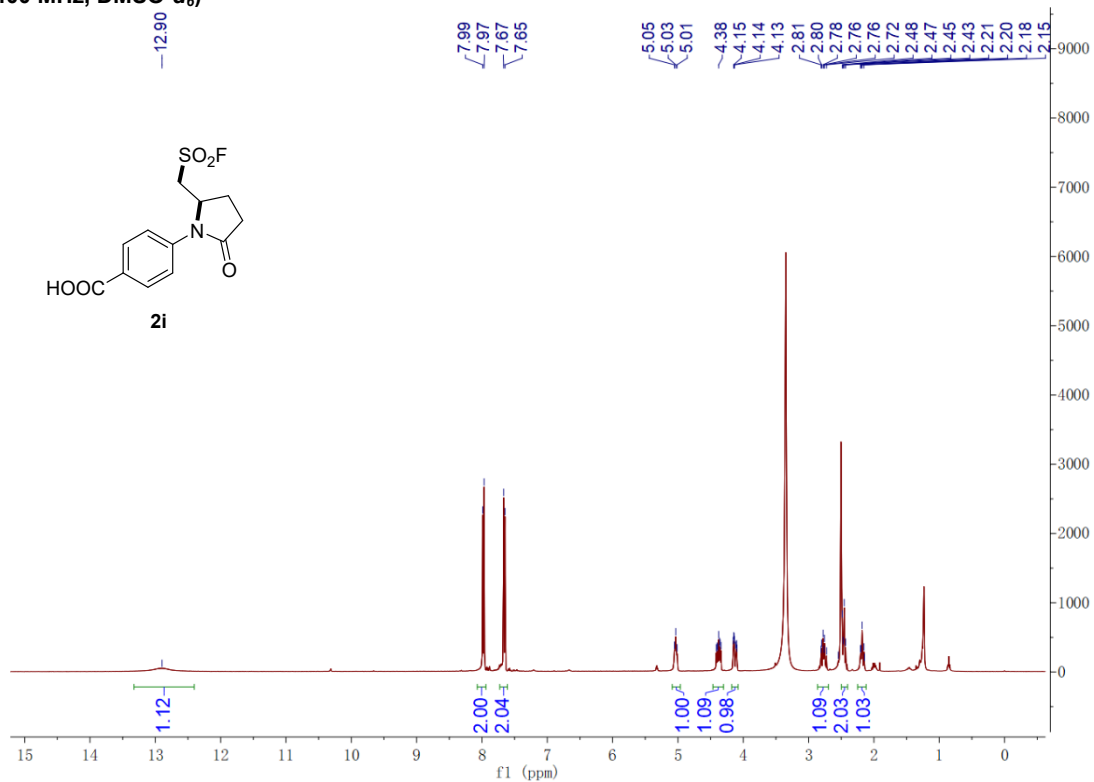

**<sup>13</sup>C-NMR (101 MHz, DMSO-*d*<sub>6</sub>)**

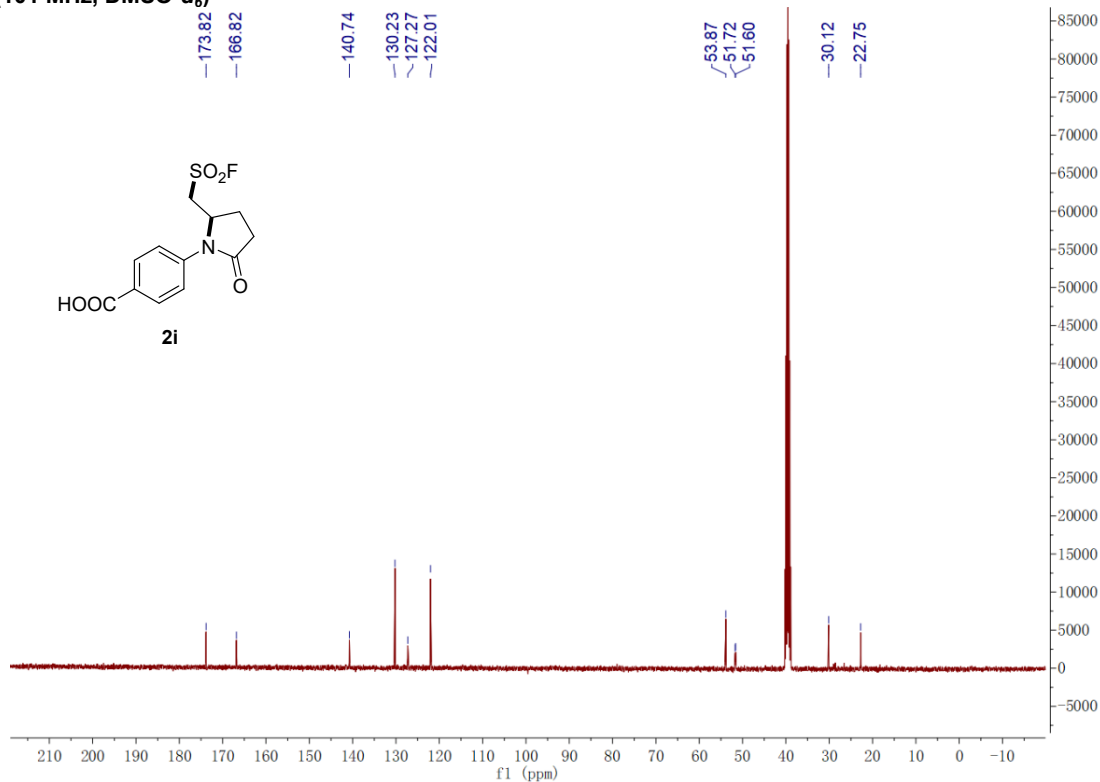

**$^{19}\text{F}$  NMR (376 MHz,  $\text{DMSO}-d_6$ )**

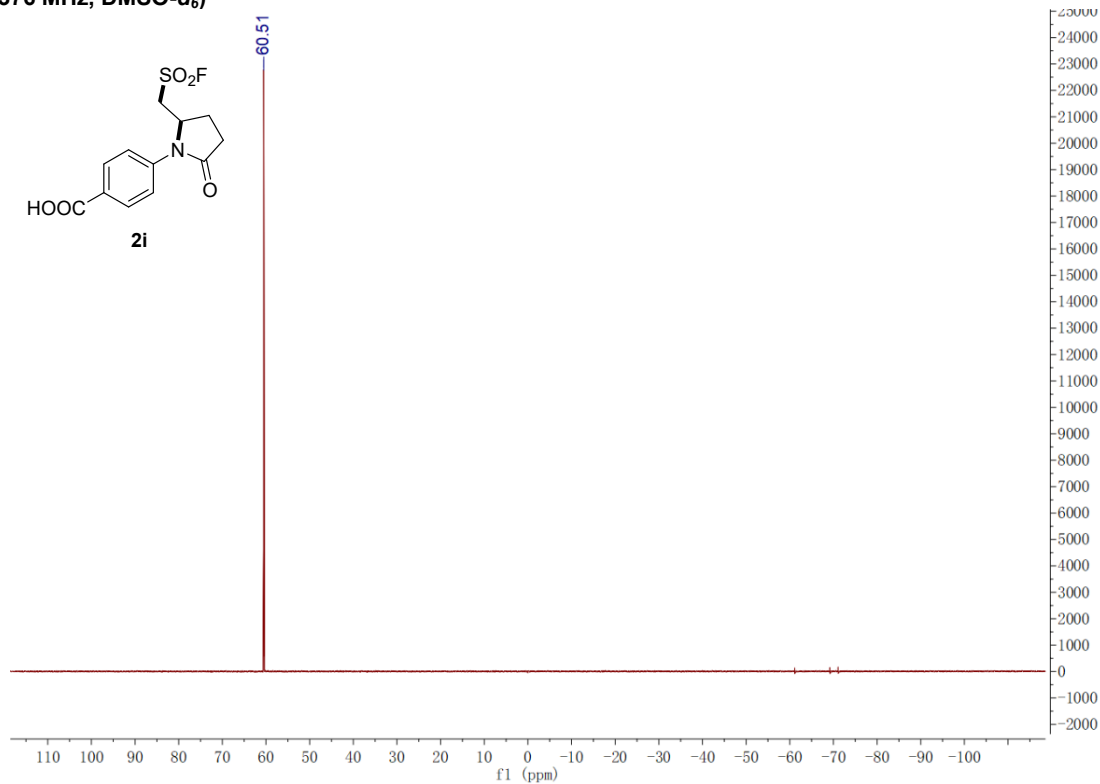

**$^1\text{H}$ -NMR (400 MHz,  $\text{CDCl}_3$ )**

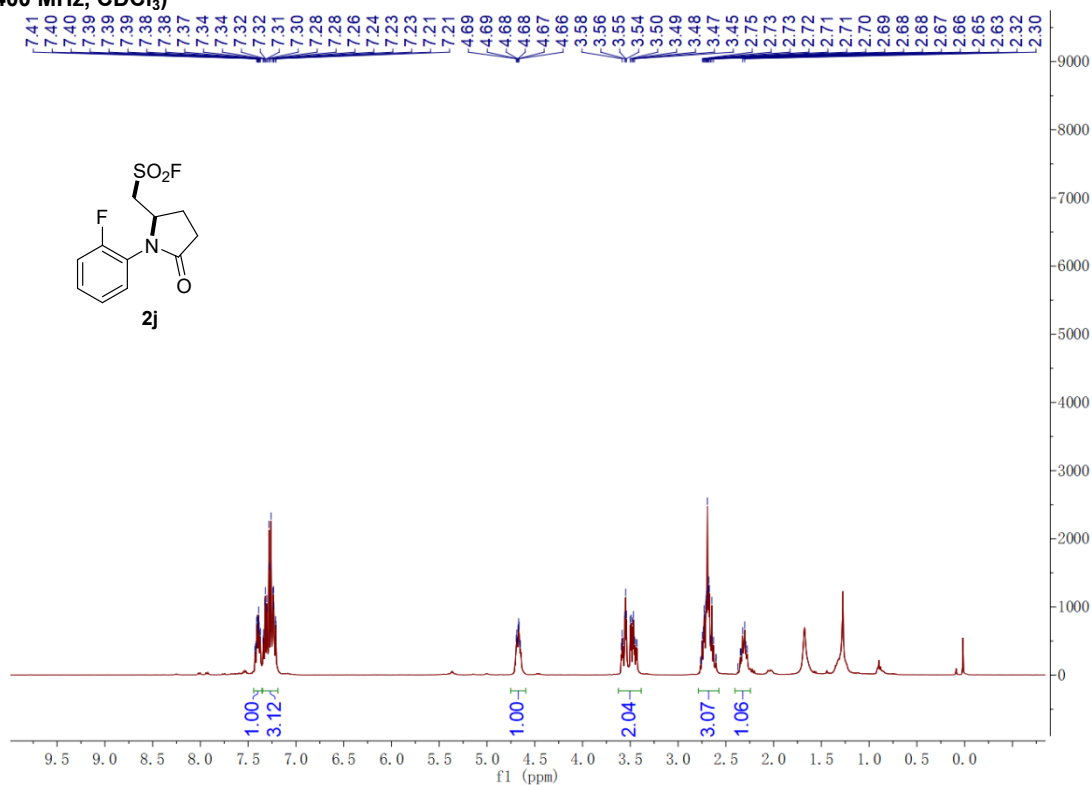

**$^{13}\text{C}$ -NMR (101 MHz,  $\text{CDCl}_3$ )**

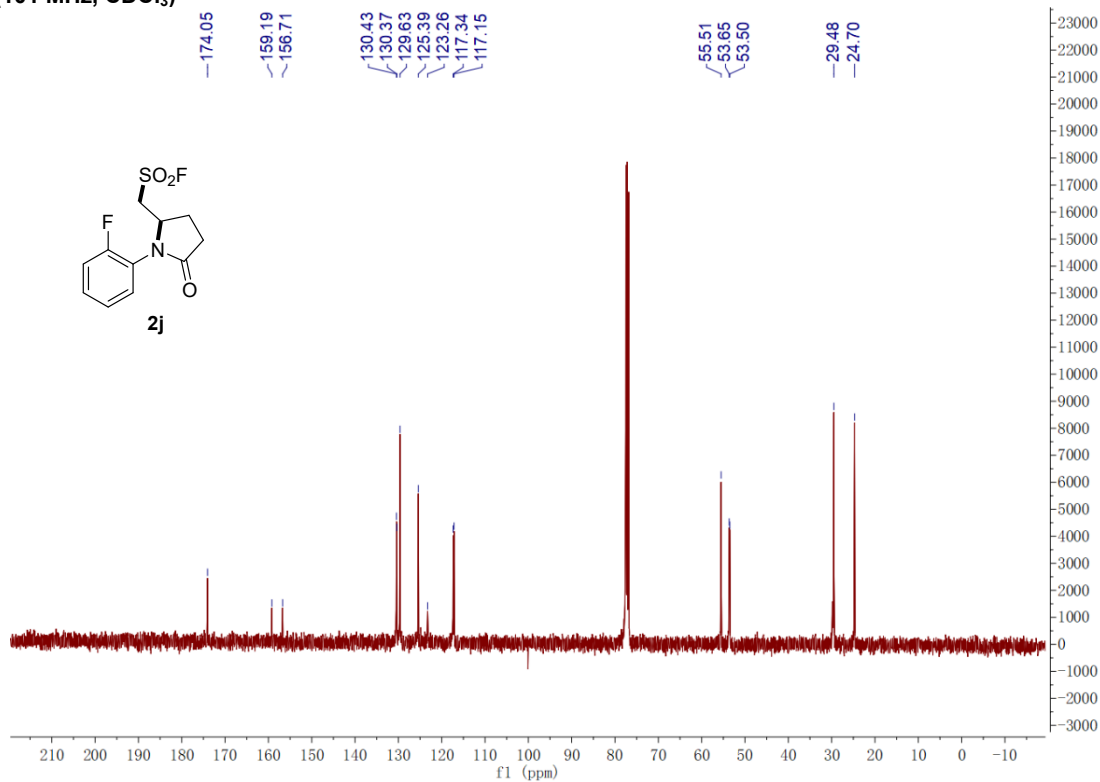

**$^{19}\text{F}$  NMR (376 MHz,  $\text{CDCl}_3$ )**

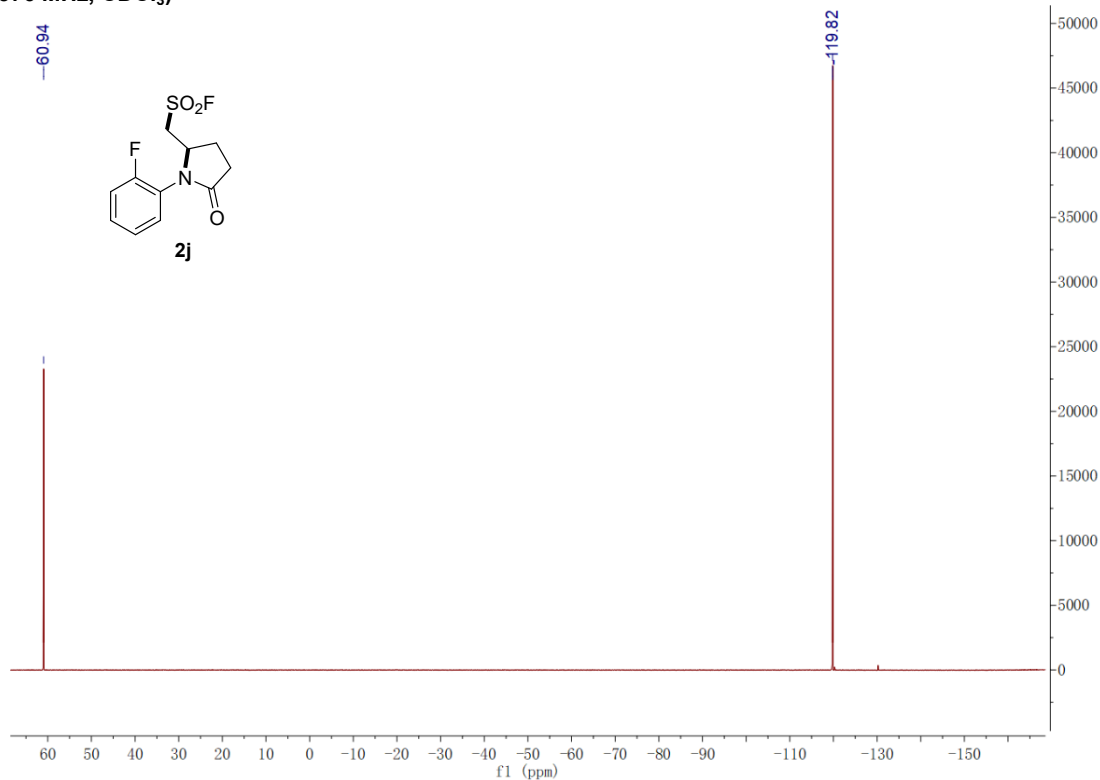



**<sup>1</sup>H-NMR (400 MHz, CDCl<sub>3</sub>)**

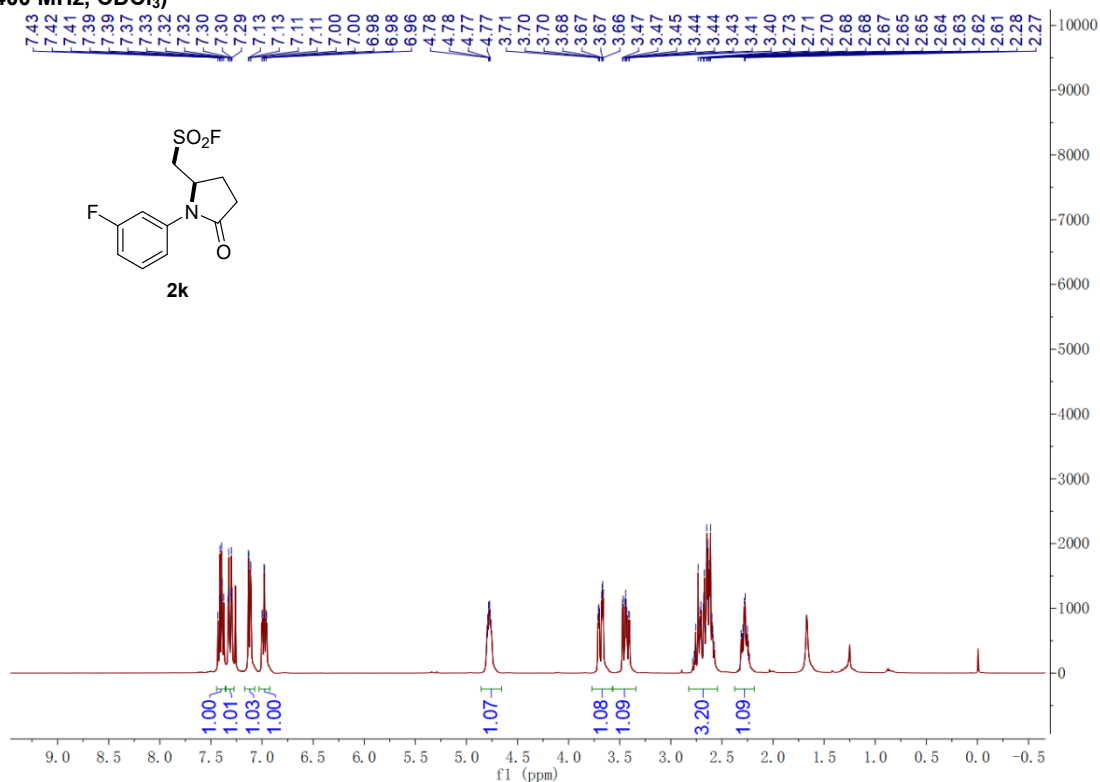

**<sup>13</sup>C-NMR (101 MHz, CDCl<sub>3</sub>)**

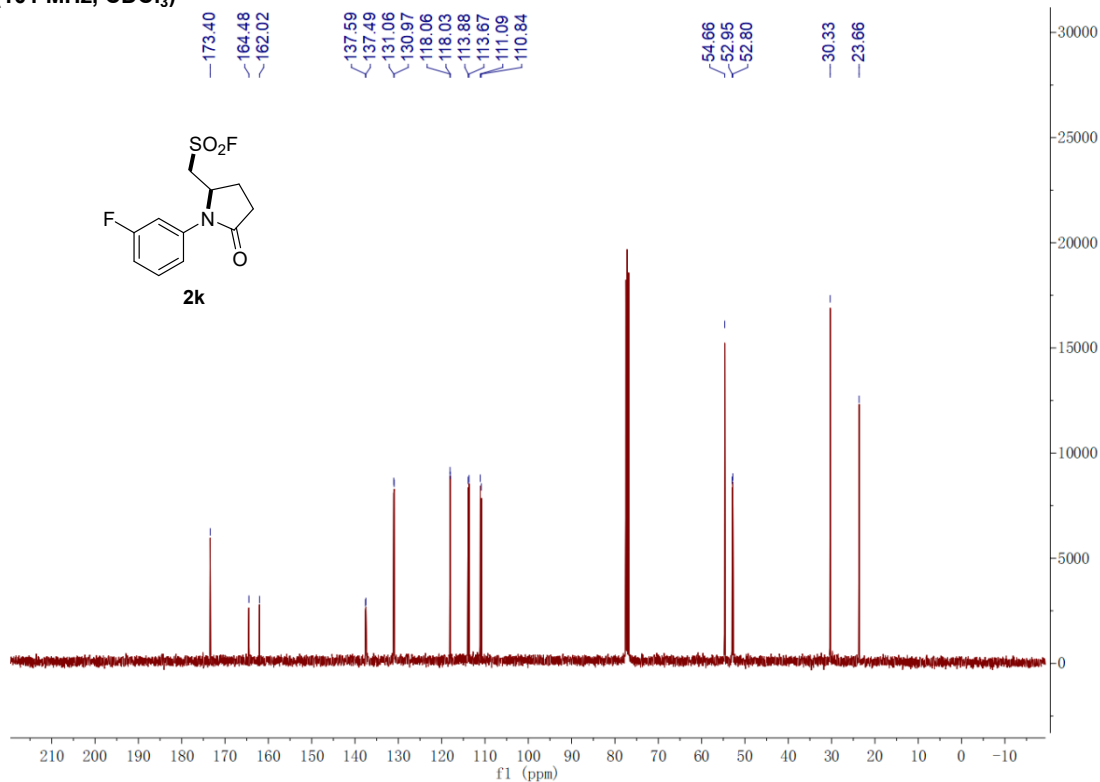

**<sup>19</sup>F NMR (376 MHz, CDCl<sub>3</sub>)**

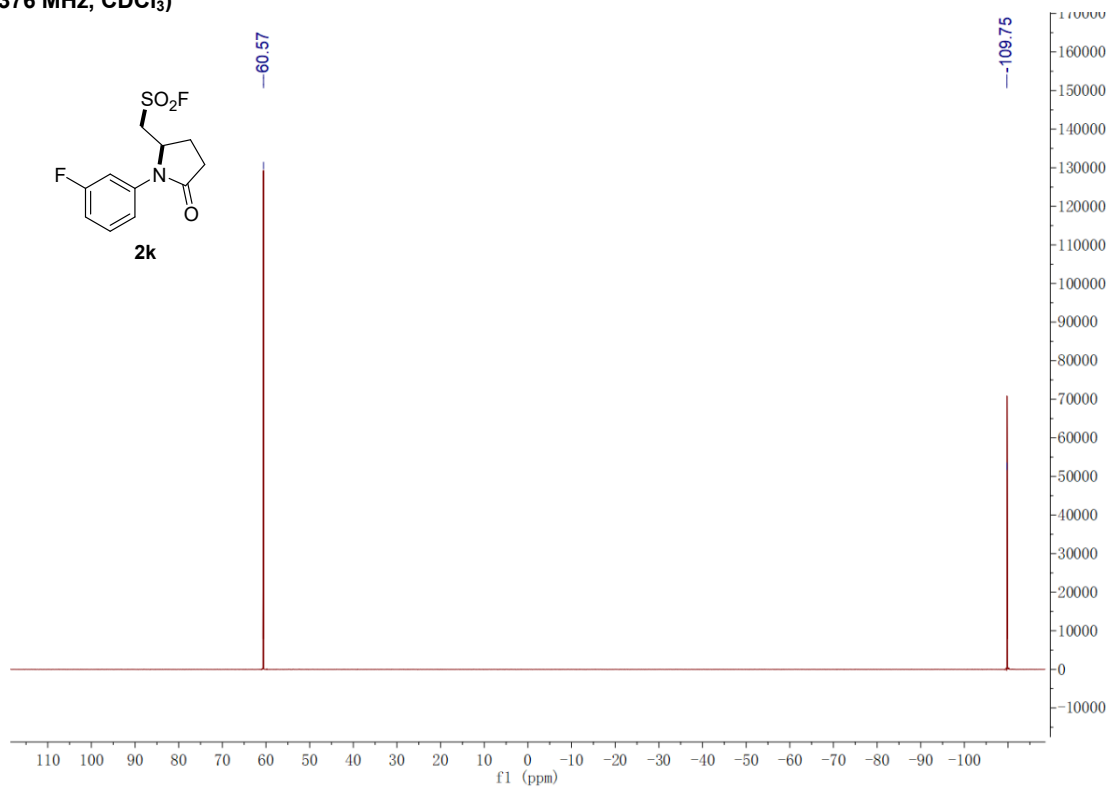

**<sup>1</sup>H-NMR (400 MHz, CDCl<sub>3</sub>)**

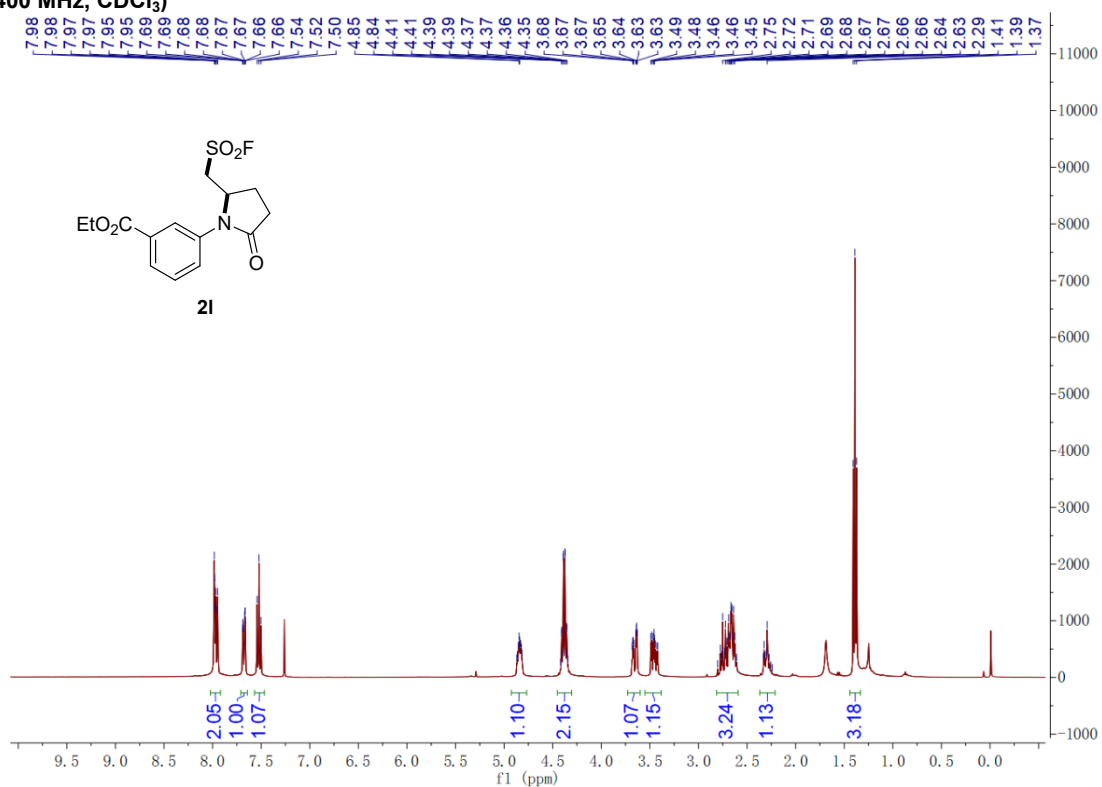

**<sup>13</sup>C-NMR (101 MHz, CDCl<sub>3</sub>)**

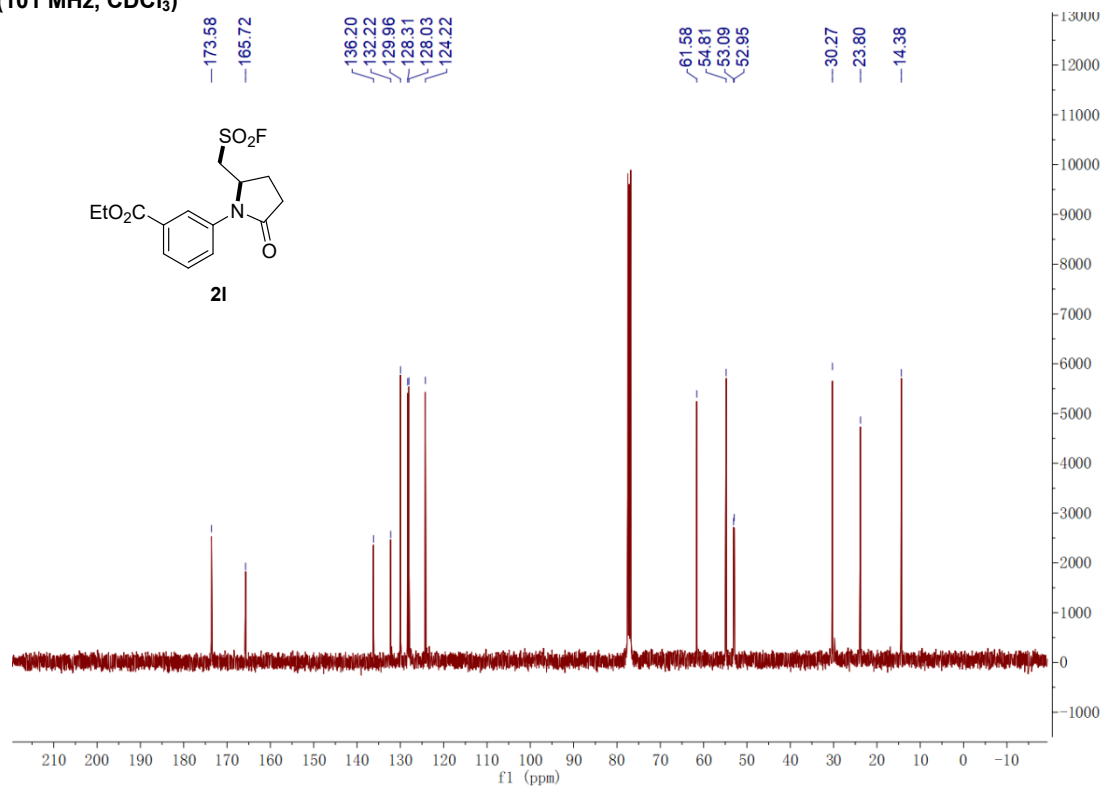

**<sup>19</sup>F NMR (376 MHz, CDCl<sub>3</sub>)**

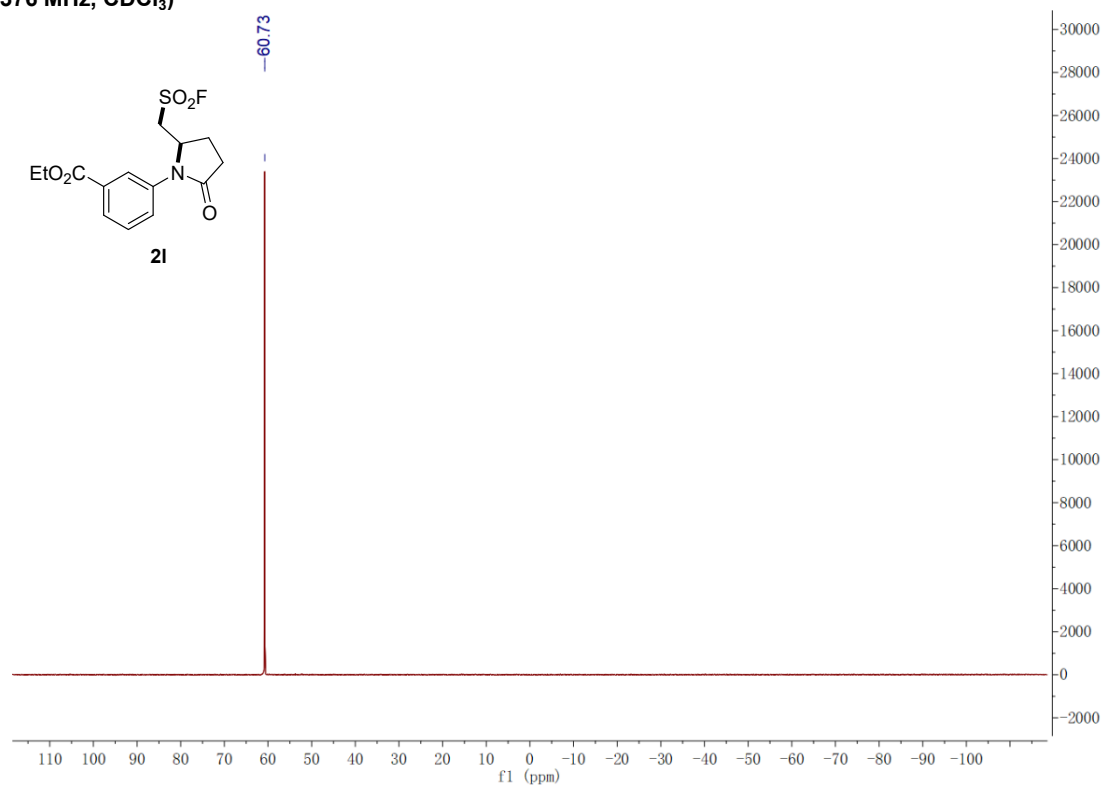

**<sup>1</sup>H-NMR (400 MHz, CDCl<sub>3</sub>)**

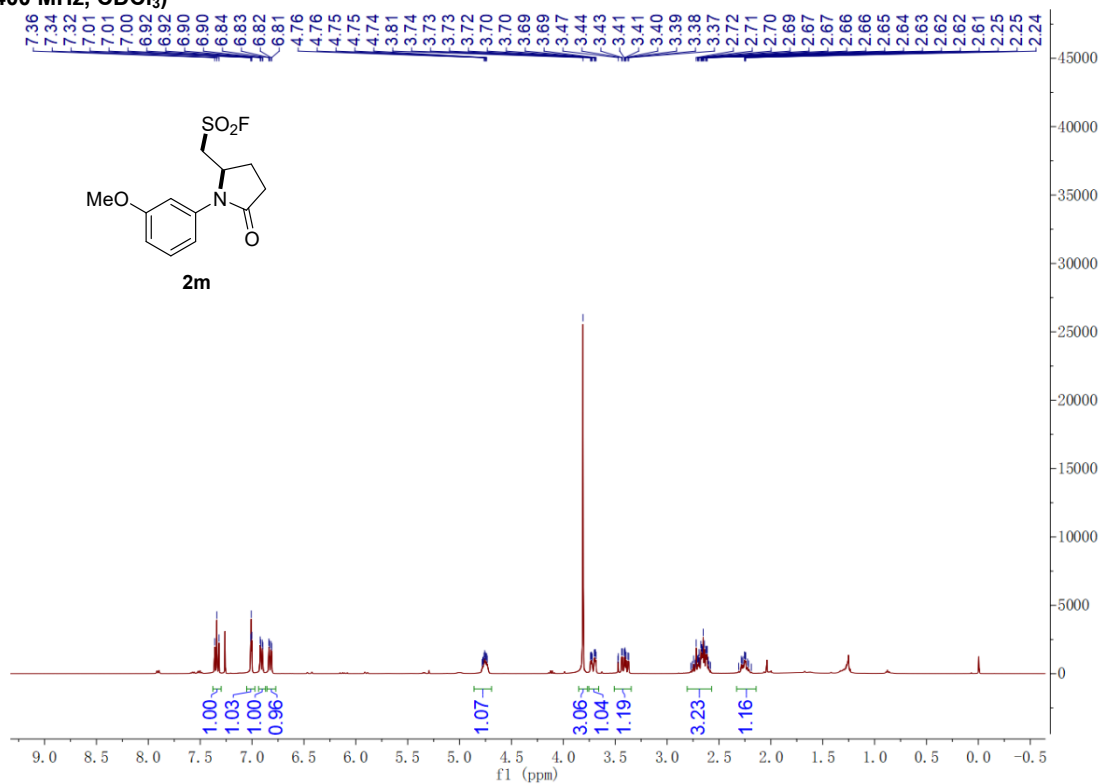

**<sup>13</sup>C-NMR (101 MHz, CDCl<sub>3</sub>)**

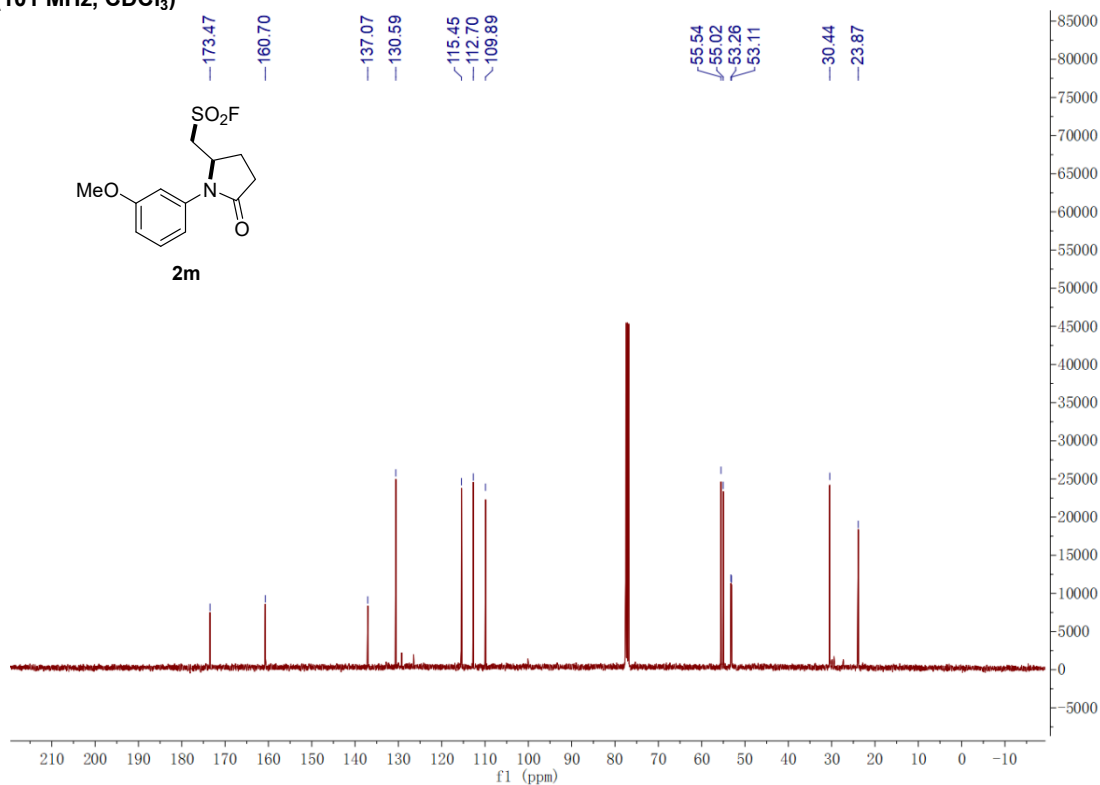

**<sup>19</sup>F NMR (376 MHz, CDCl<sub>3</sub>)**

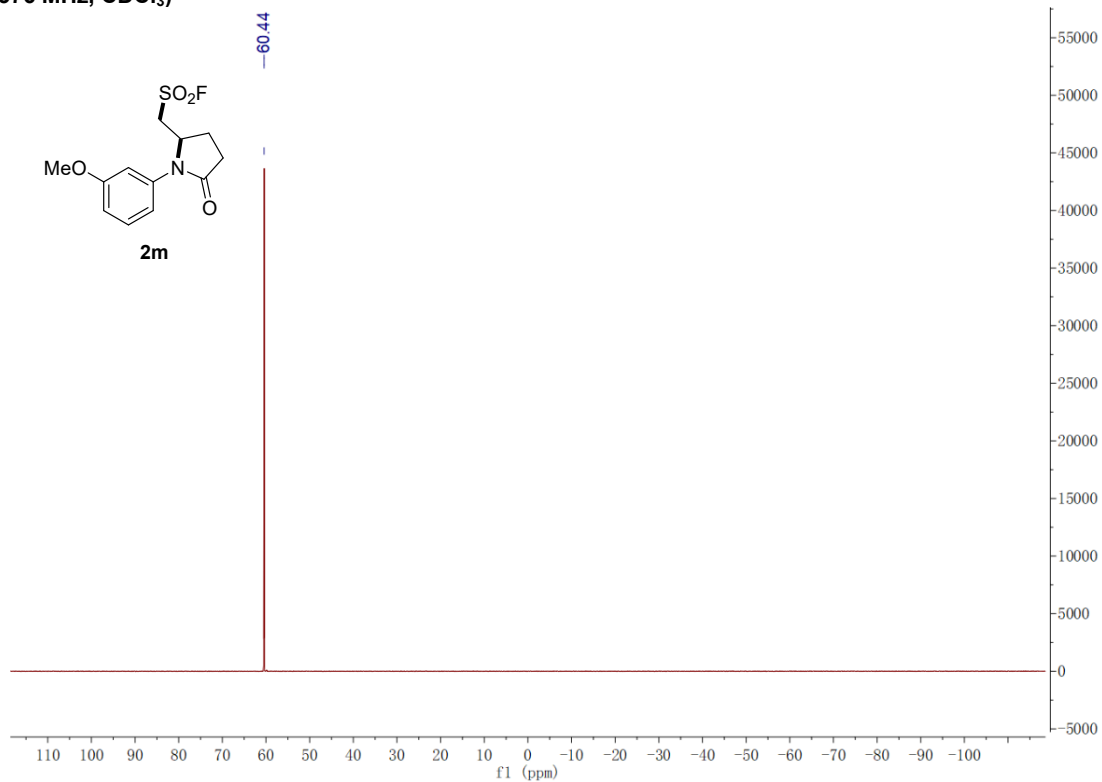

**<sup>1</sup>H-NMR (400 MHz, CDCl<sub>3</sub>)**

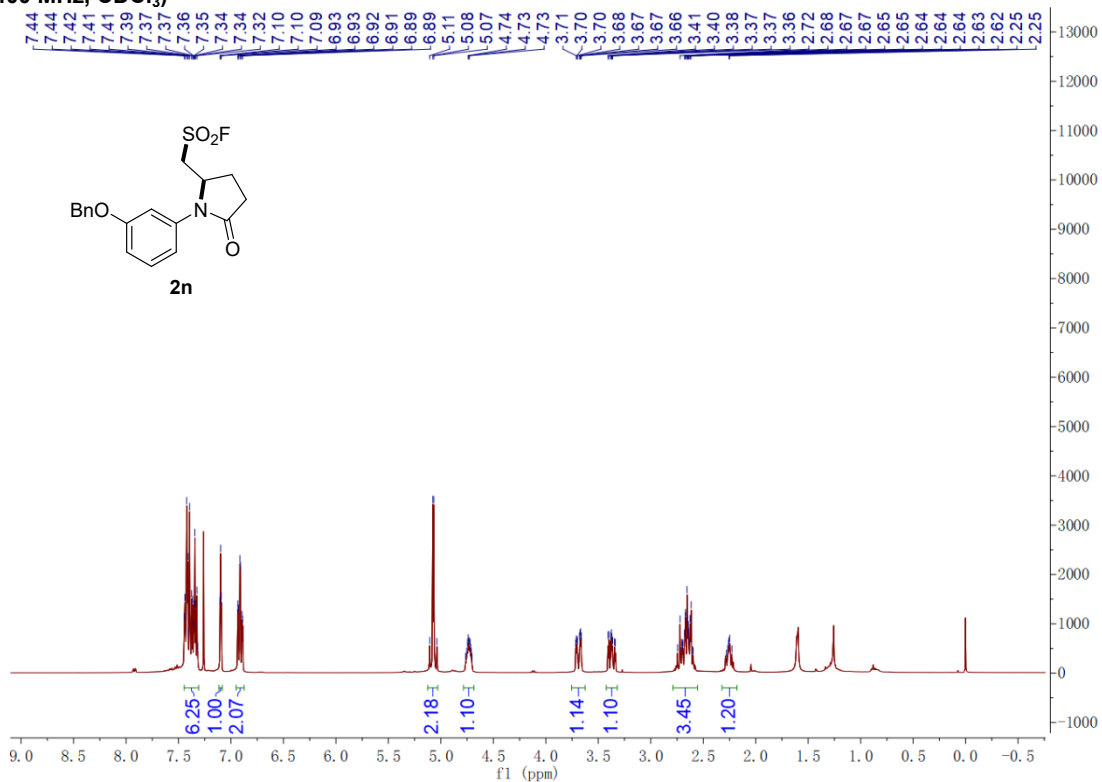

**<sup>13</sup>C-NMR (101 MHz, CDCl<sub>3</sub>)**

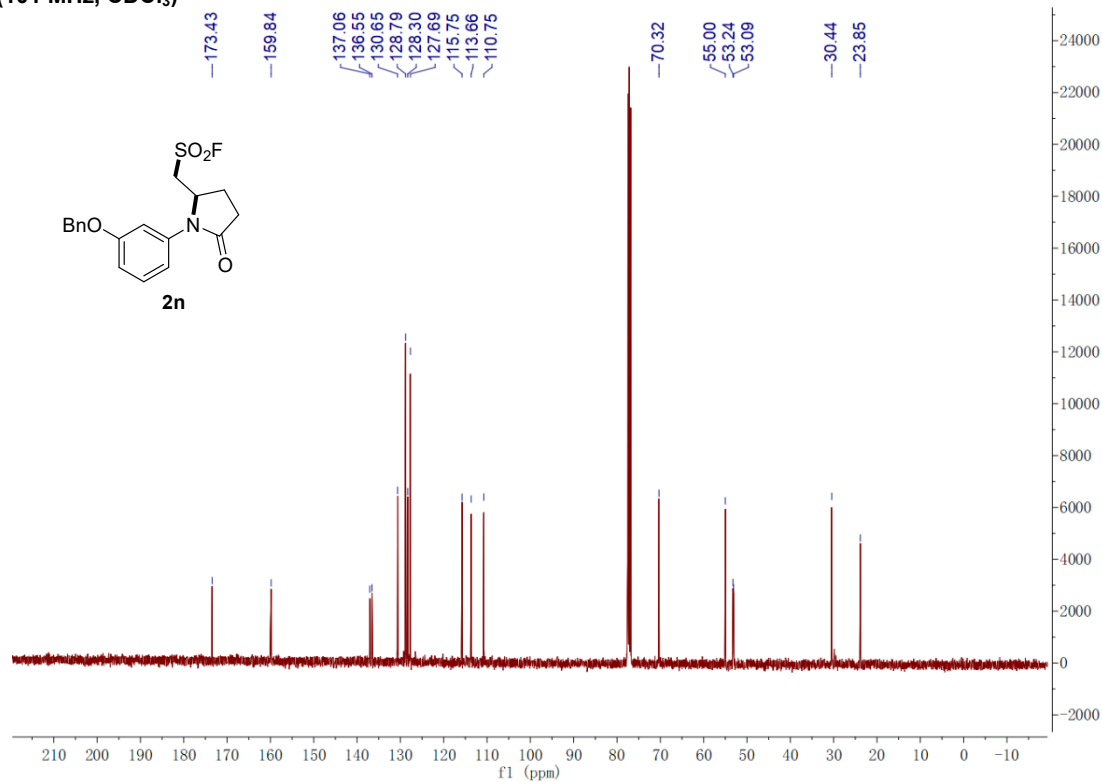

**<sup>19</sup>F NMR (376 MHz, CDCl<sub>3</sub>)**

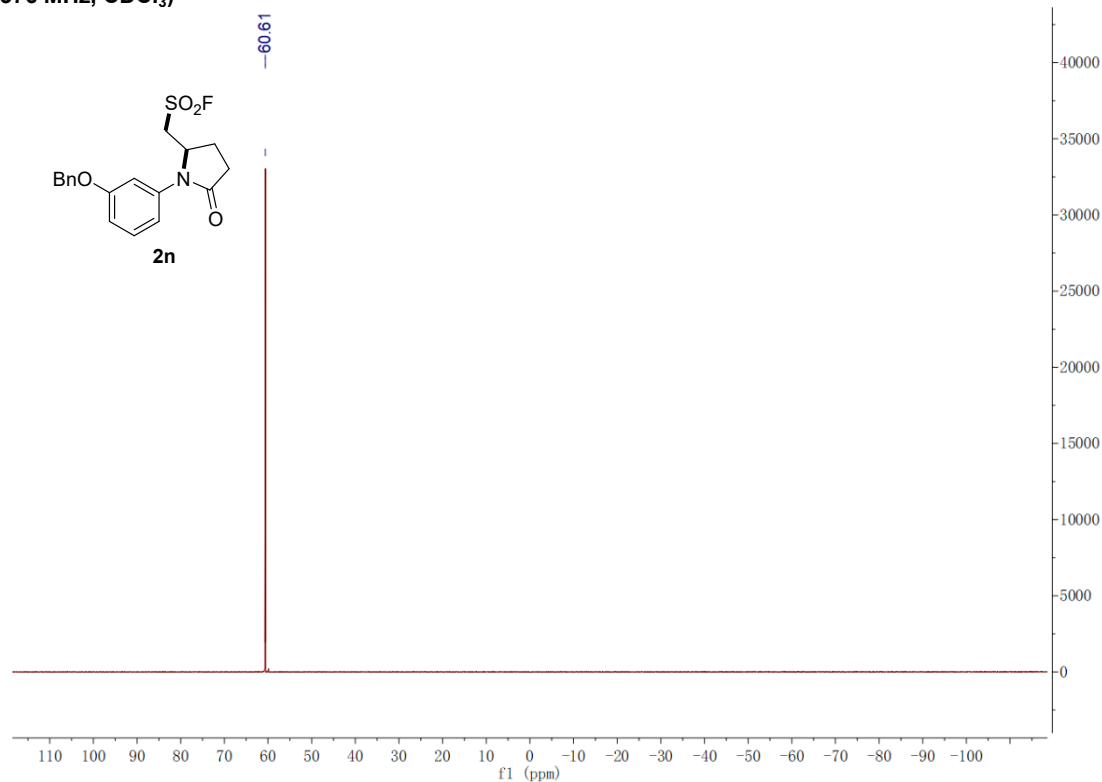

**<sup>1</sup>H-NMR (400 MHz, CDCl<sub>3</sub>)**

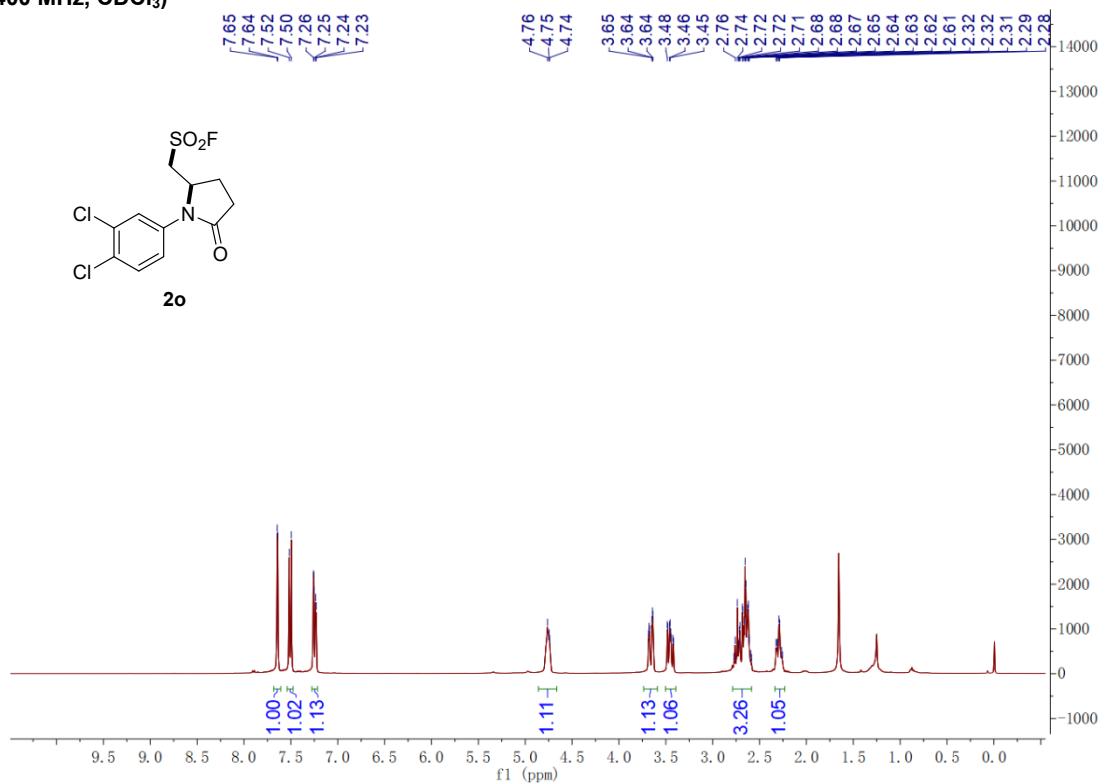

**<sup>13</sup>C-NMR (126 MHz, CDCl<sub>3</sub>)**

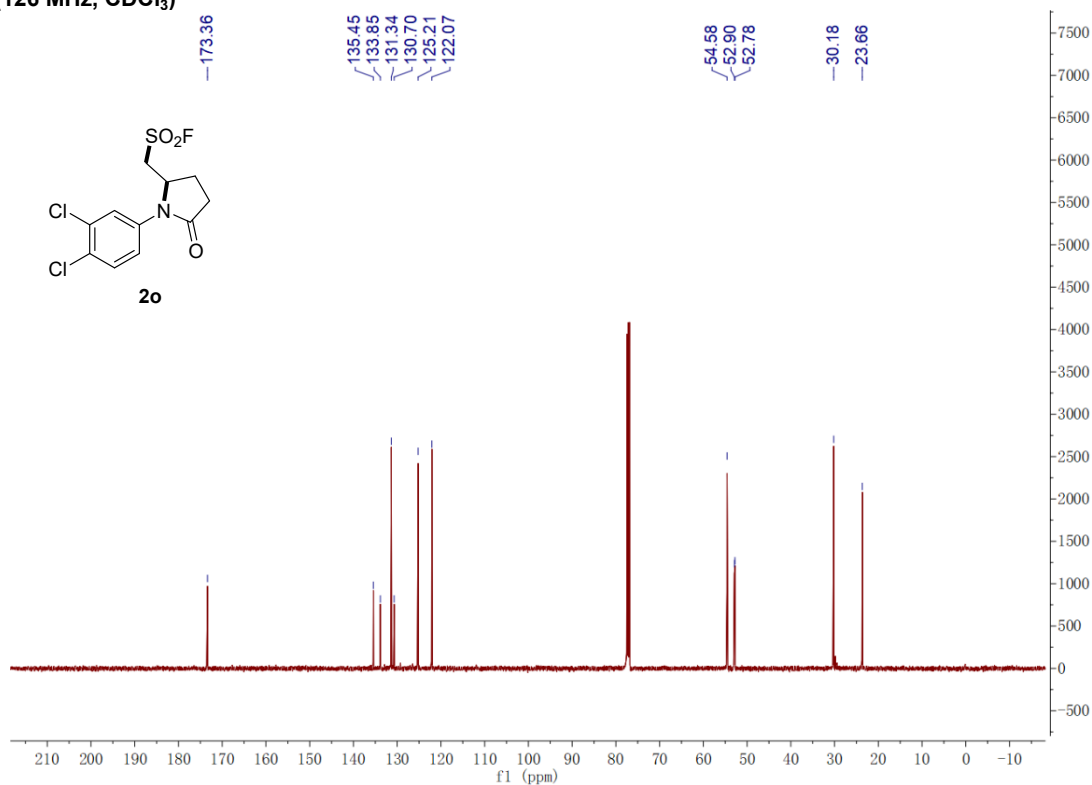

<sup>19</sup>F NMR (376 MHz, CDCl<sub>3</sub>)

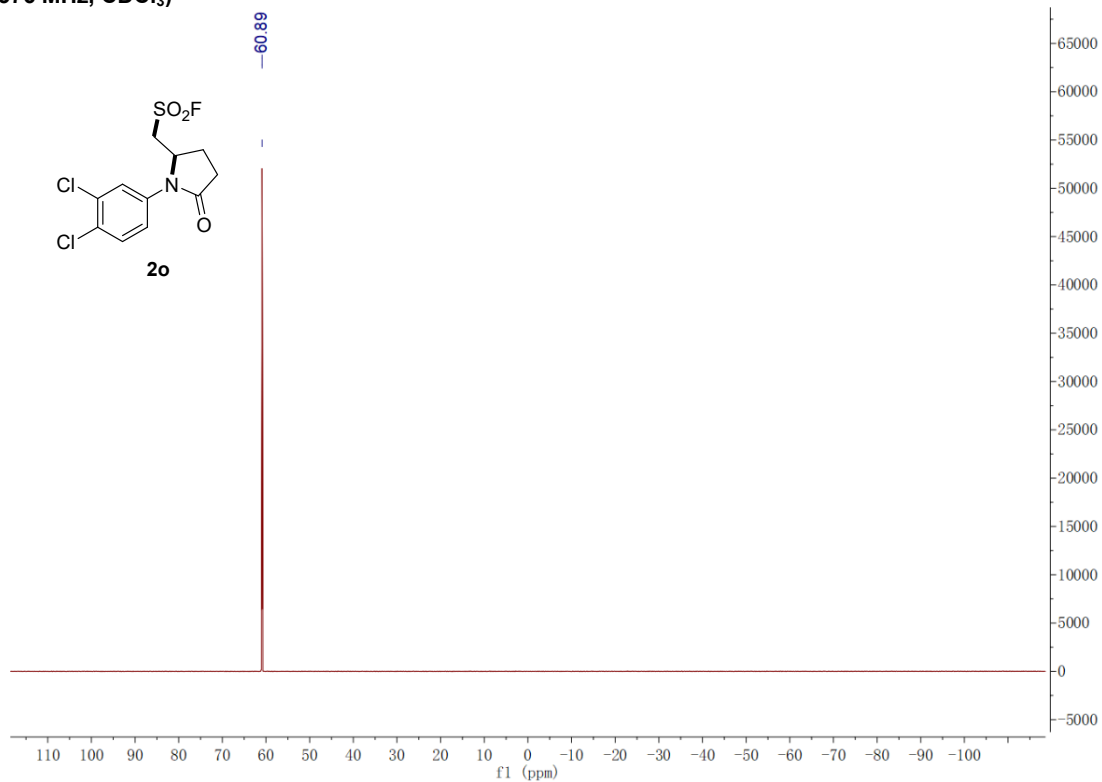

<sup>1</sup>H-NMR (400 MHz, DMSO-d<sub>6</sub>)

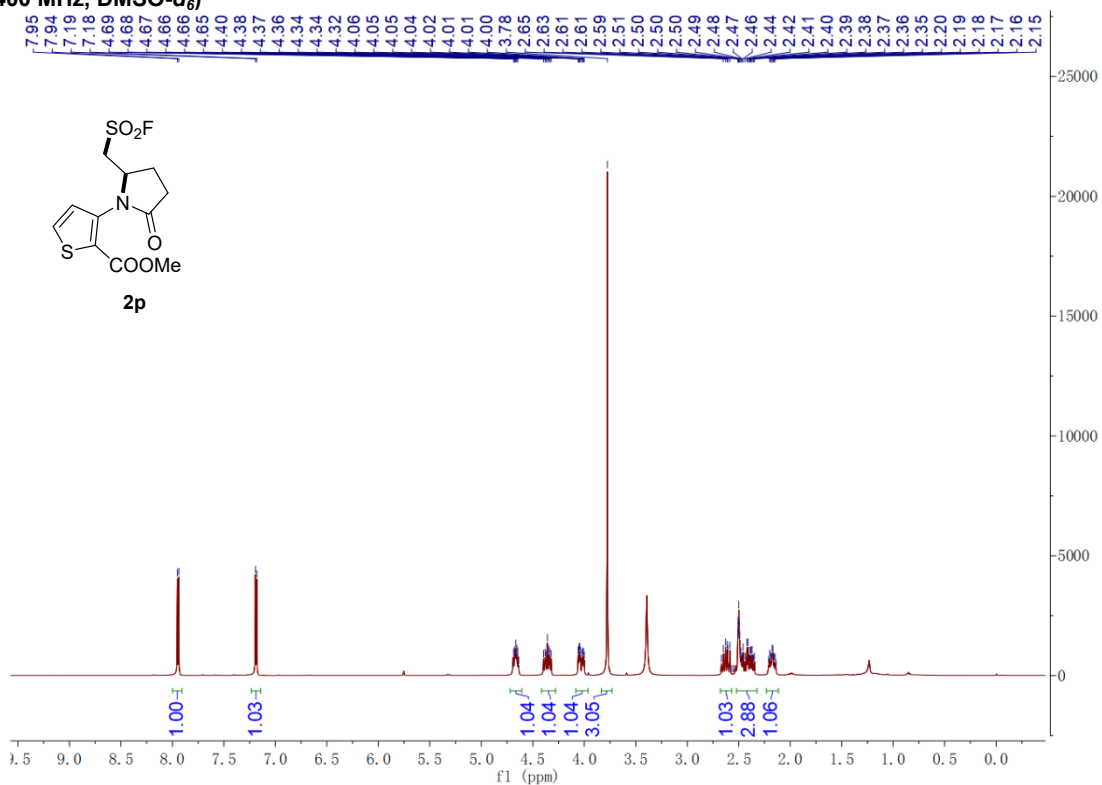



**<sup>13</sup>C-NMR (126 MHz, DMSO-*d*<sub>6</sub>)**

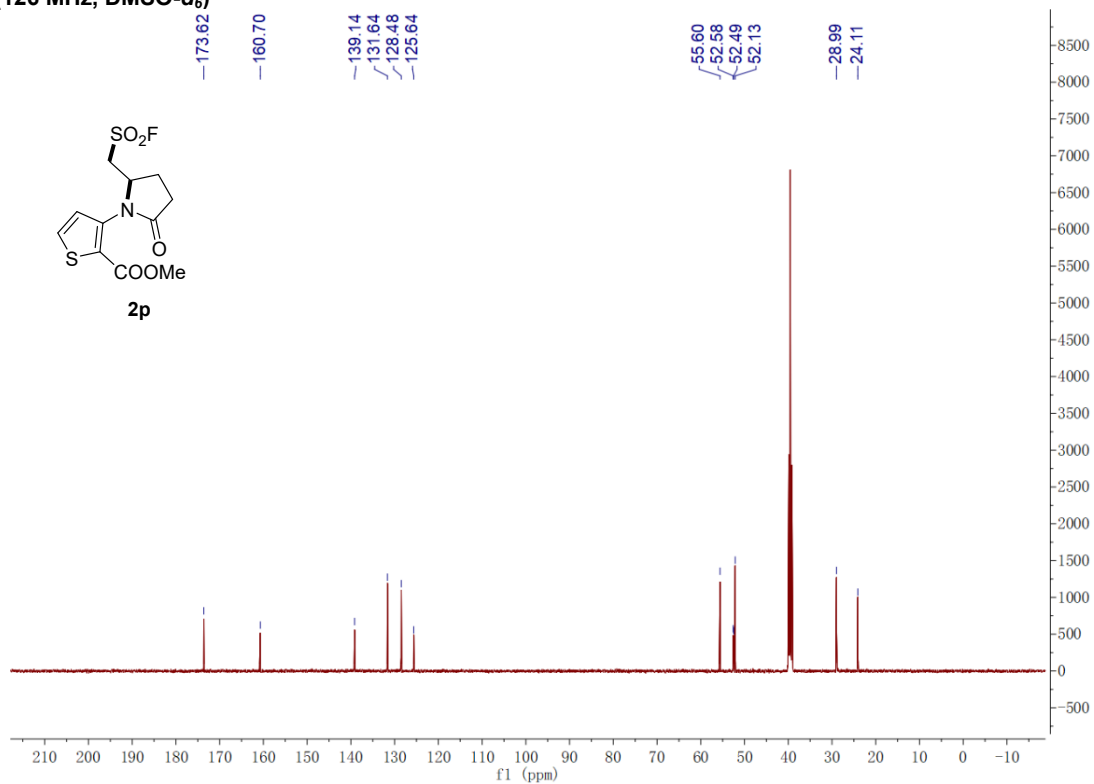

**<sup>19</sup>F NMR (376 MHz, DMSO-*d*<sub>6</sub>)**

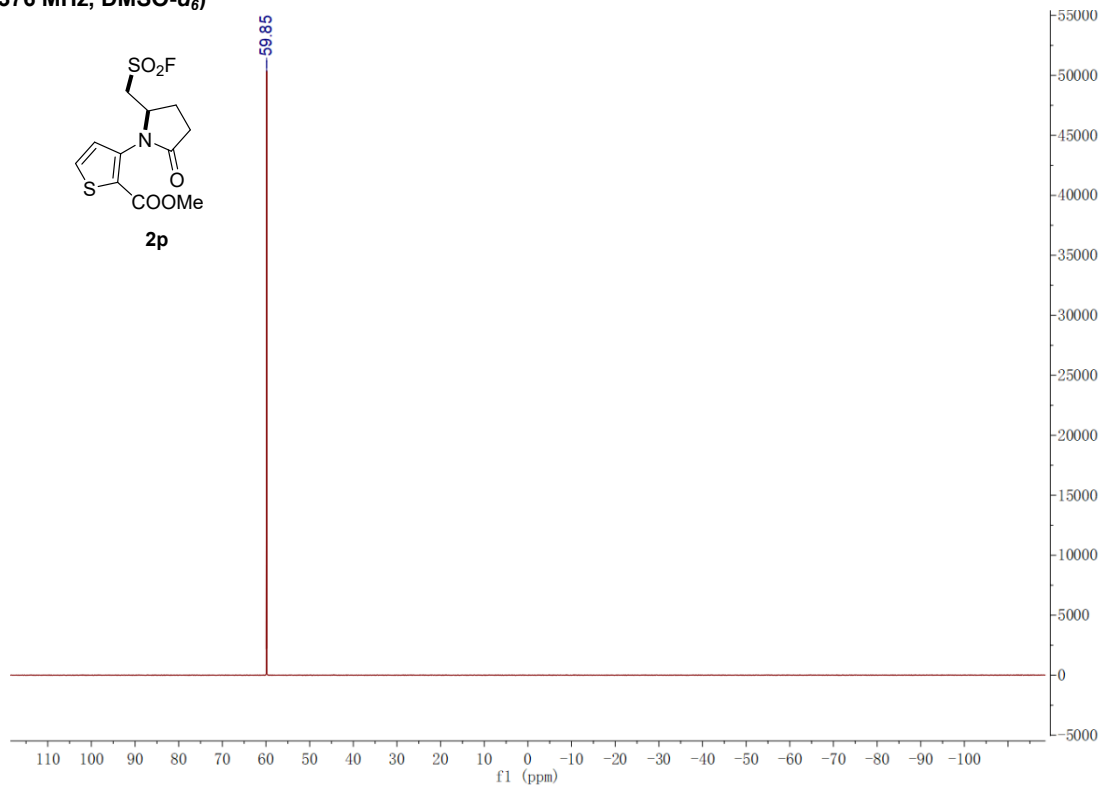

**<sup>1</sup>H-NMR (400 MHz, DMSO-*d*<sub>6</sub>)**

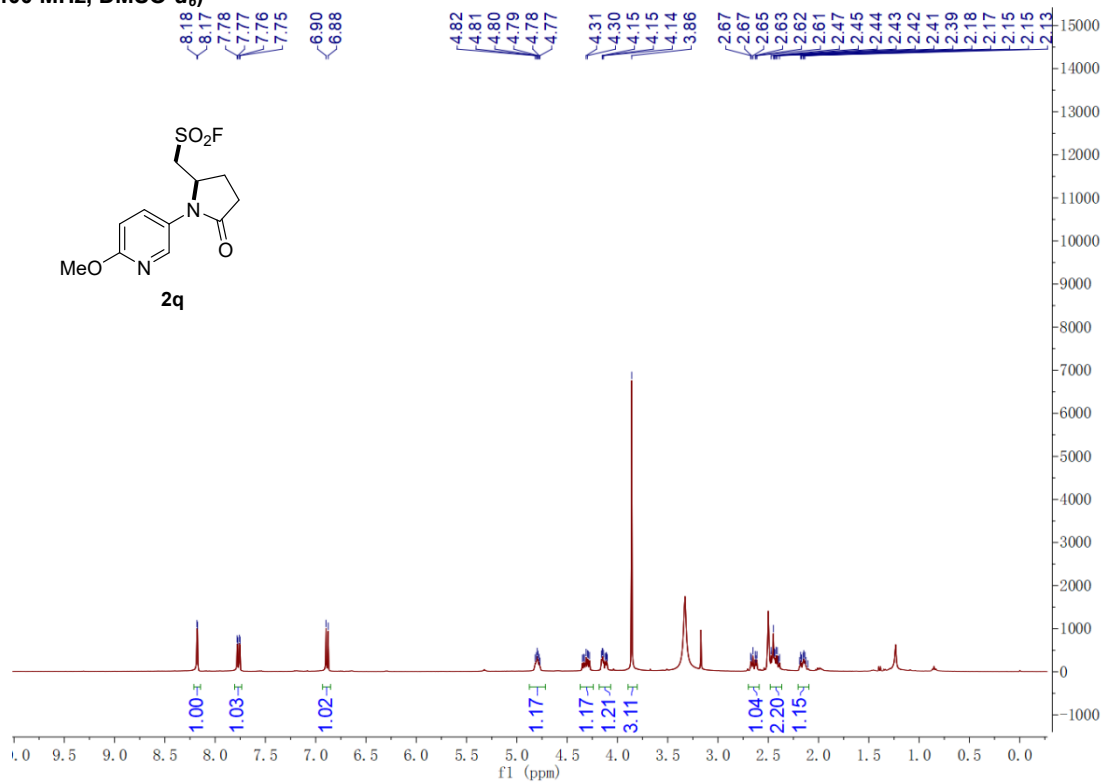

**<sup>13</sup>C-NMR (101 MHz, DMSO-*d*<sub>6</sub>)**

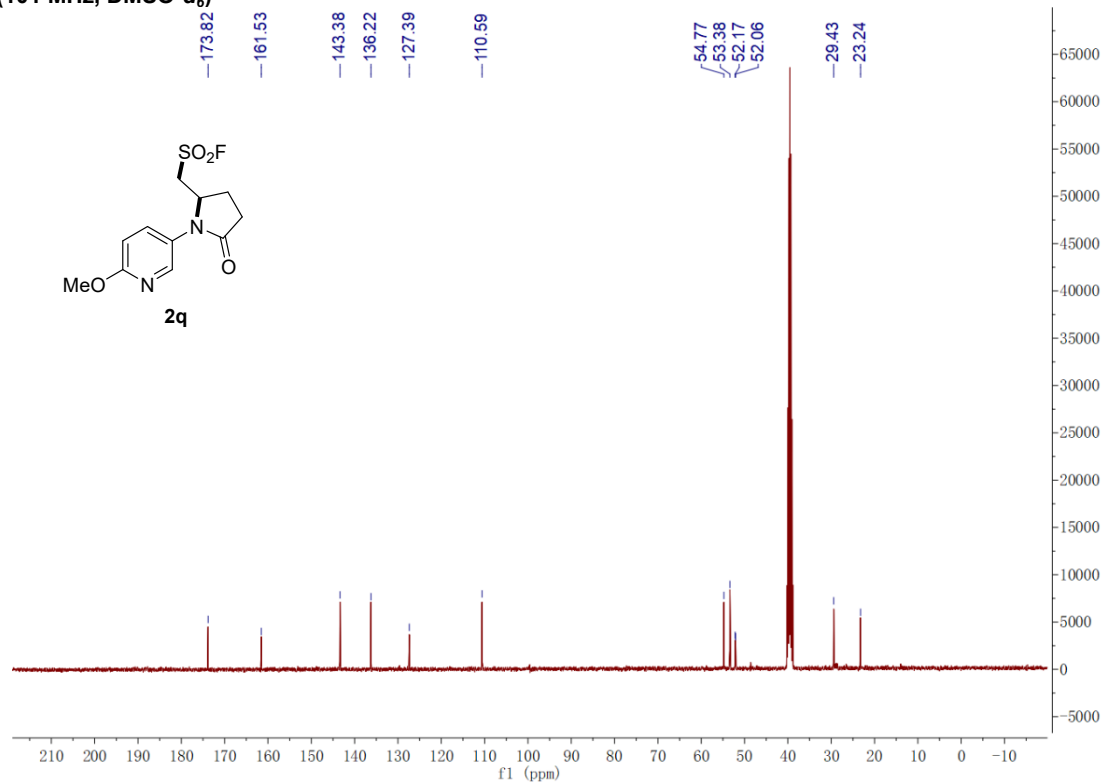

**<sup>19</sup>F NMR (376 MHz, DMSO-*d*<sub>6</sub>)**

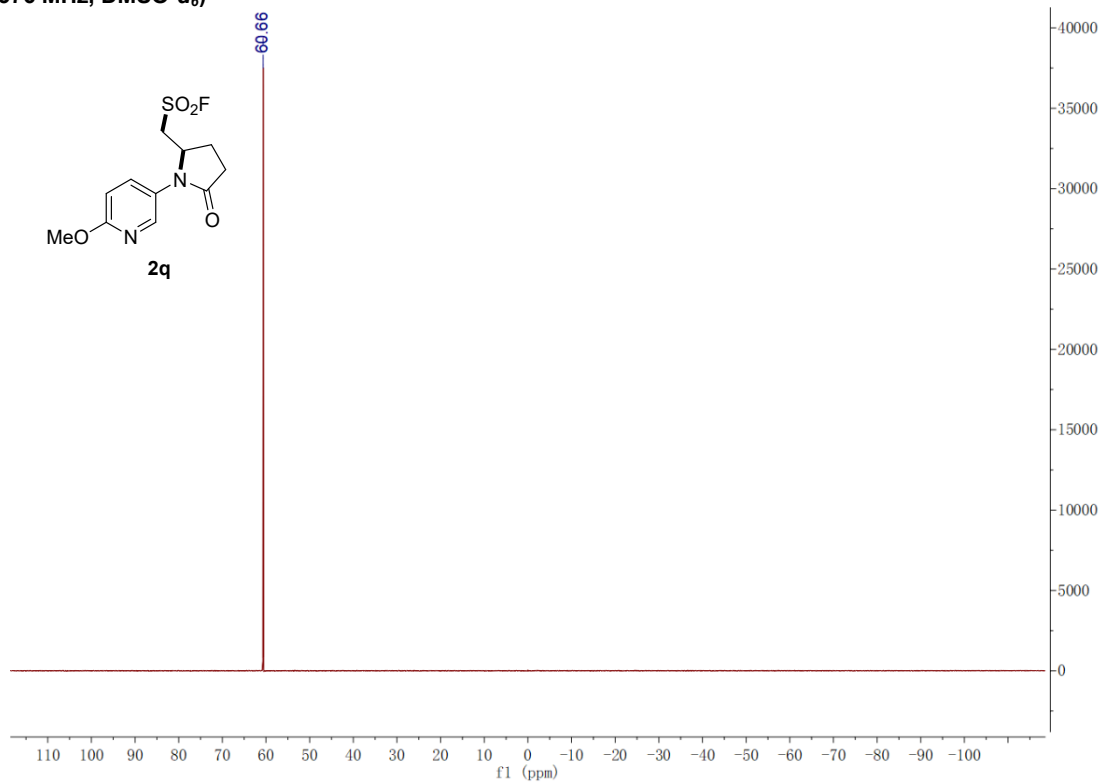

**<sup>1</sup>H-NMR (400 MHz, CDCl<sub>3</sub>)**

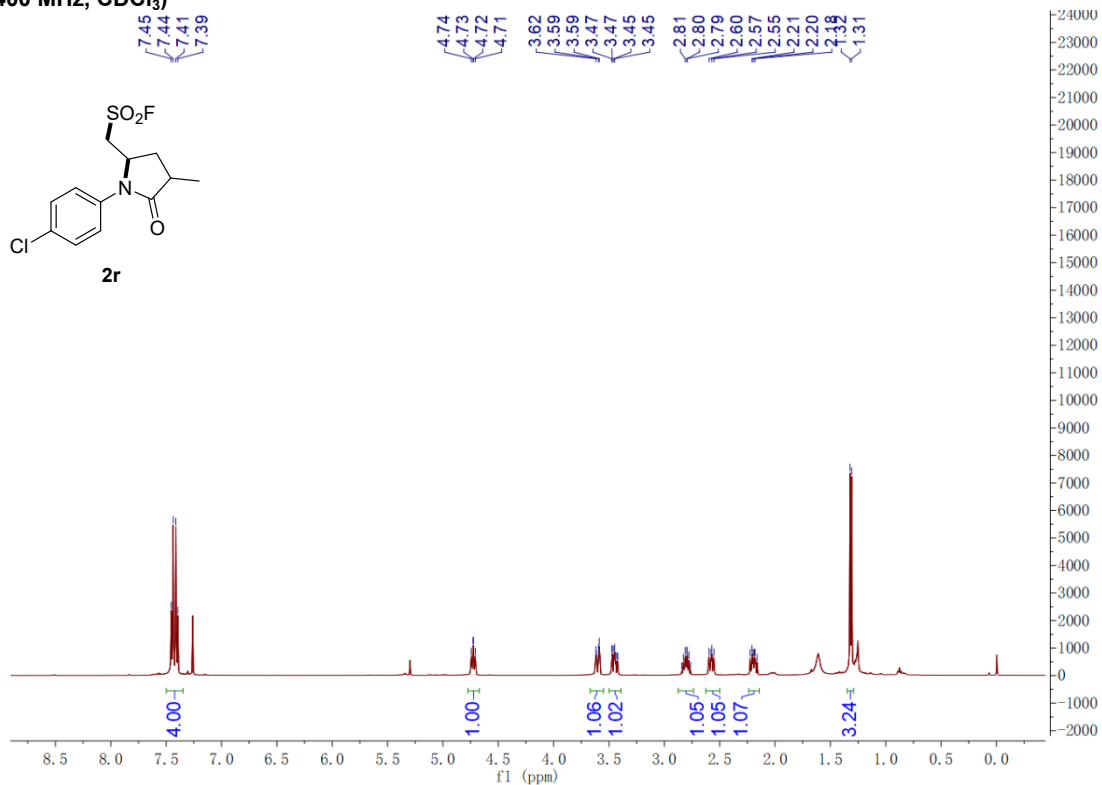

**$^{13}\text{C}$ -NMR (101 MHz,  $\text{CDCl}_3$ )**

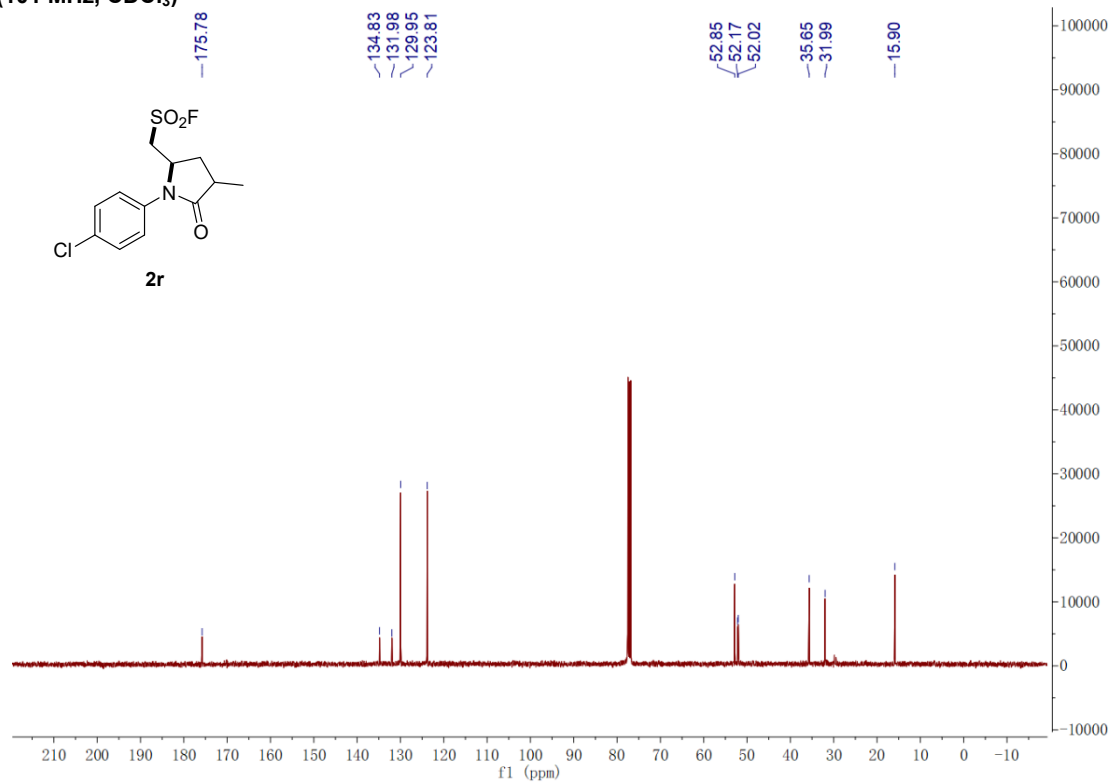

**$^{19}\text{F}$  NMR (376 MHz,  $\text{CDCl}_3$ )**

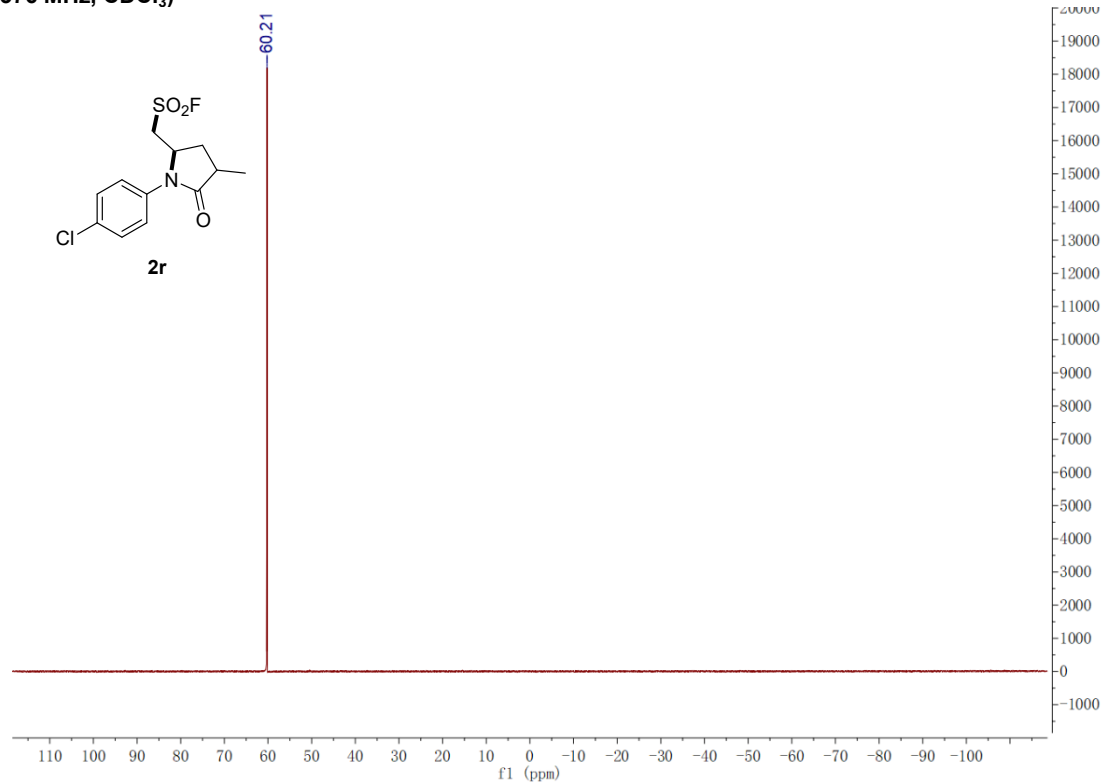

**<sup>1</sup>H-NMR (400 MHz, CDCl<sub>3</sub>)**

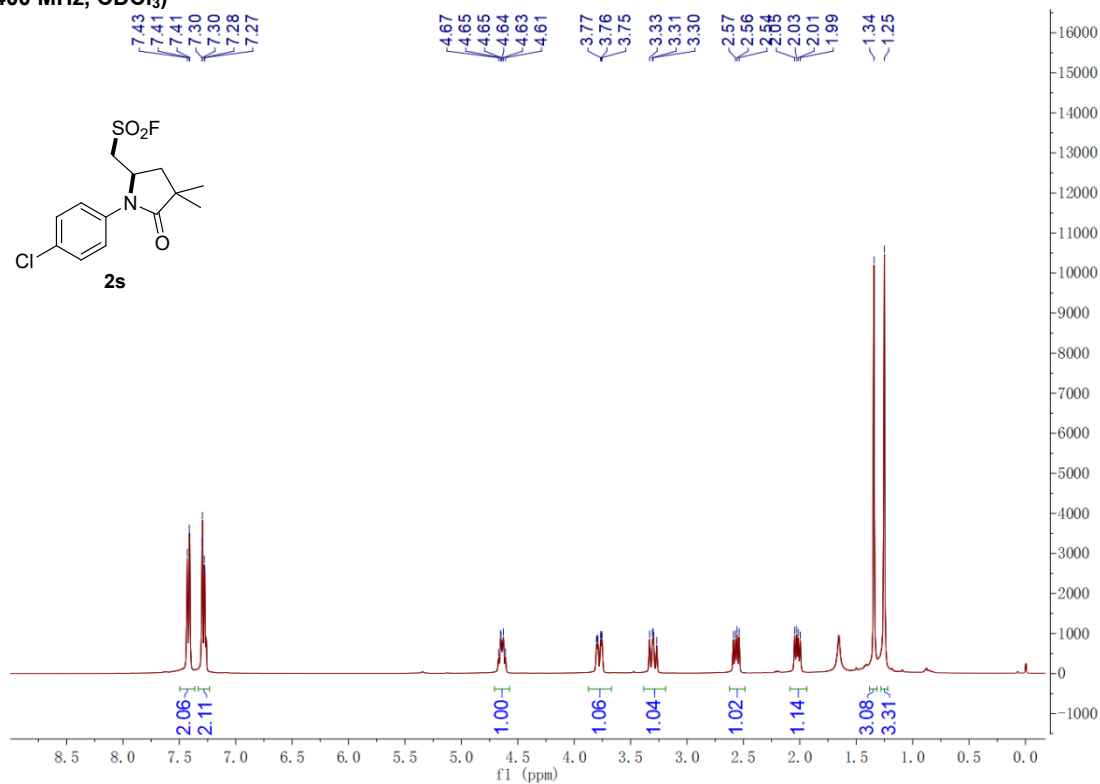

**<sup>13</sup>C-NMR (101 MHz, CDCl<sub>3</sub>)**

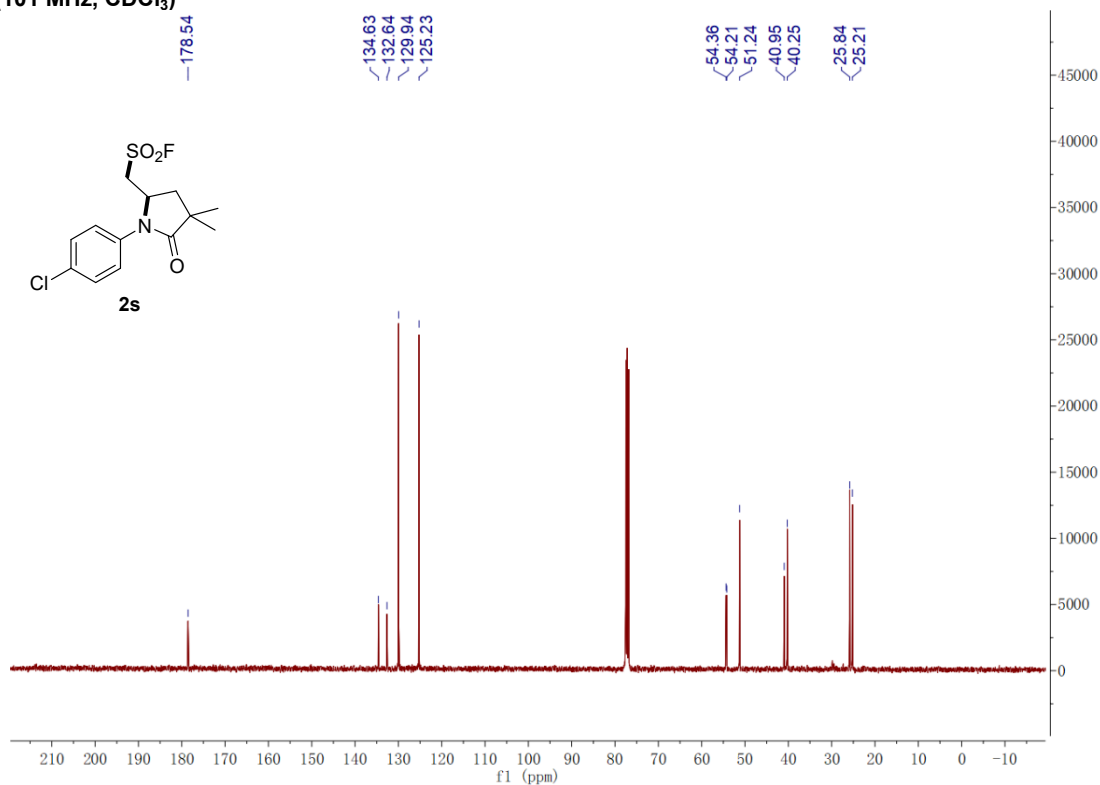

**<sup>19</sup>F NMR (376 MHz, CDCl<sub>3</sub>)**

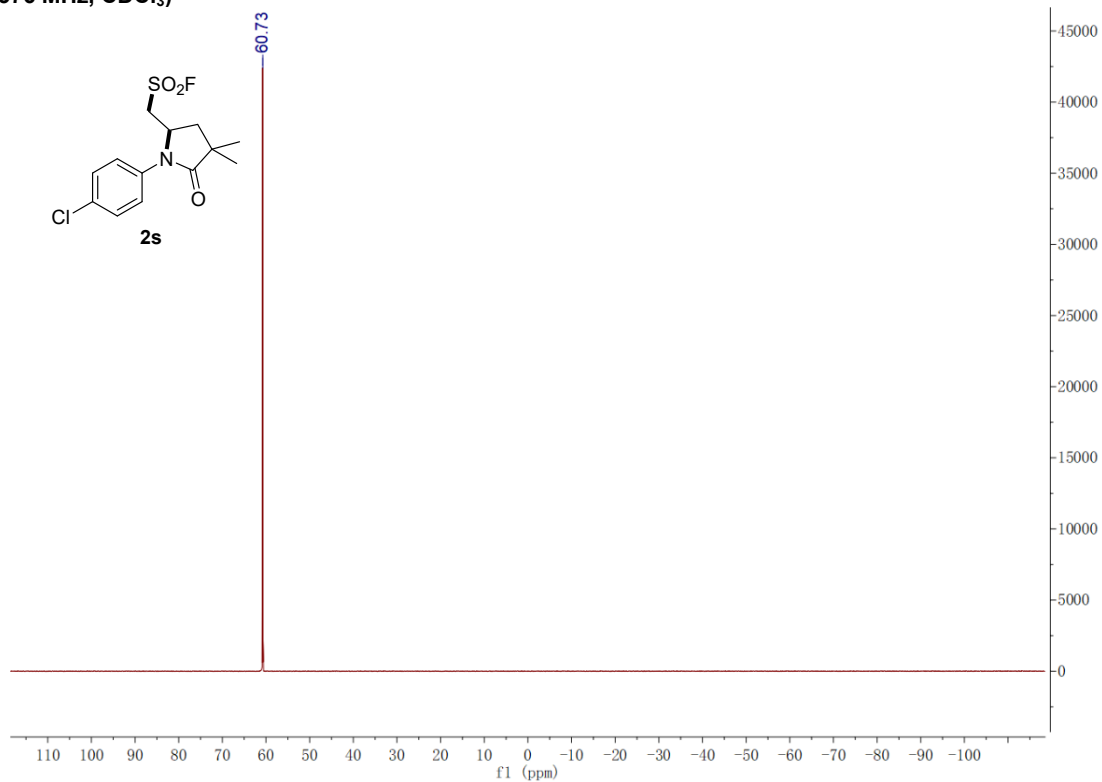

**<sup>1</sup>H-NMR (400 MHz, CDCl<sub>3</sub>)**

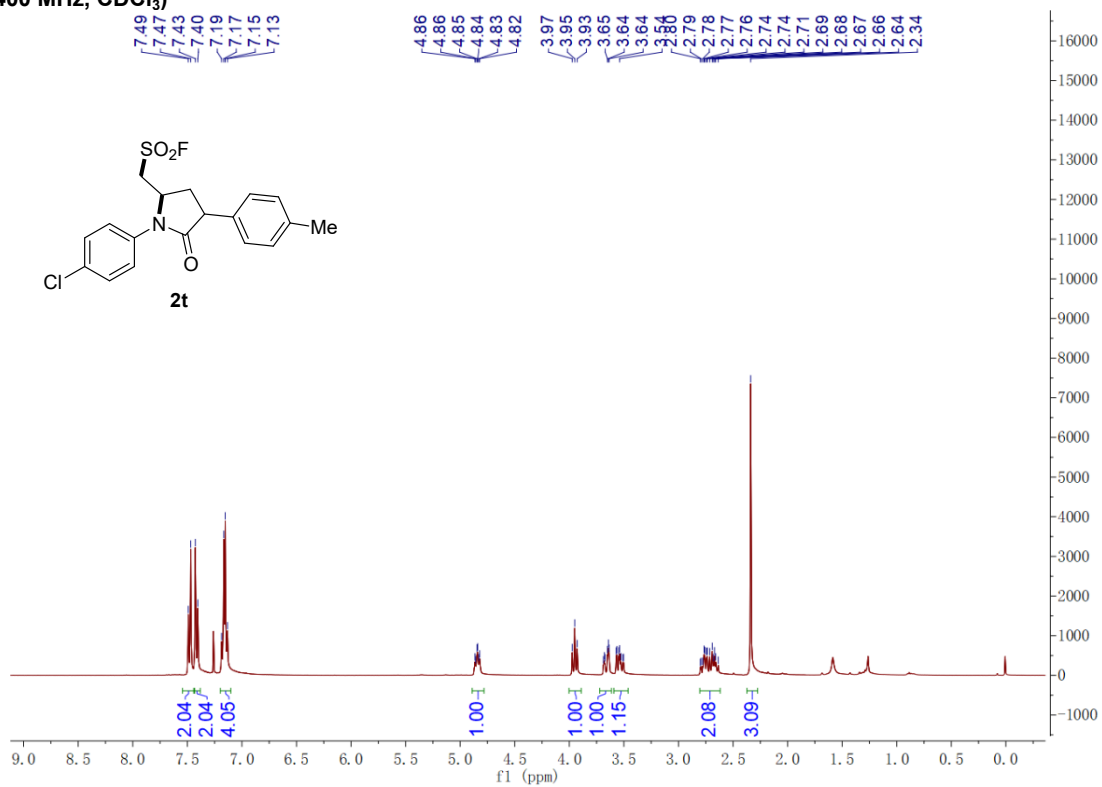

**$^{13}\text{C}$ -NMR (101 MHz,  $\text{CDCl}_3$ )**

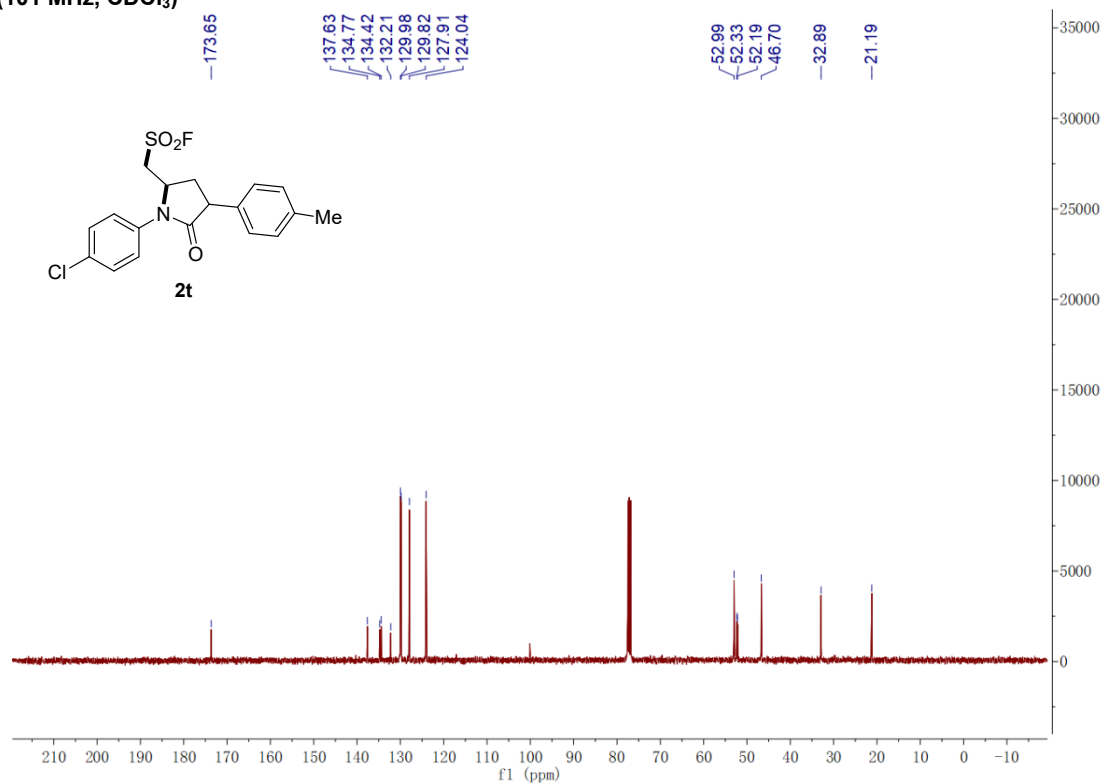

**$^{19}\text{F}$  NMR (376 MHz,  $\text{CDCl}_3$ )**

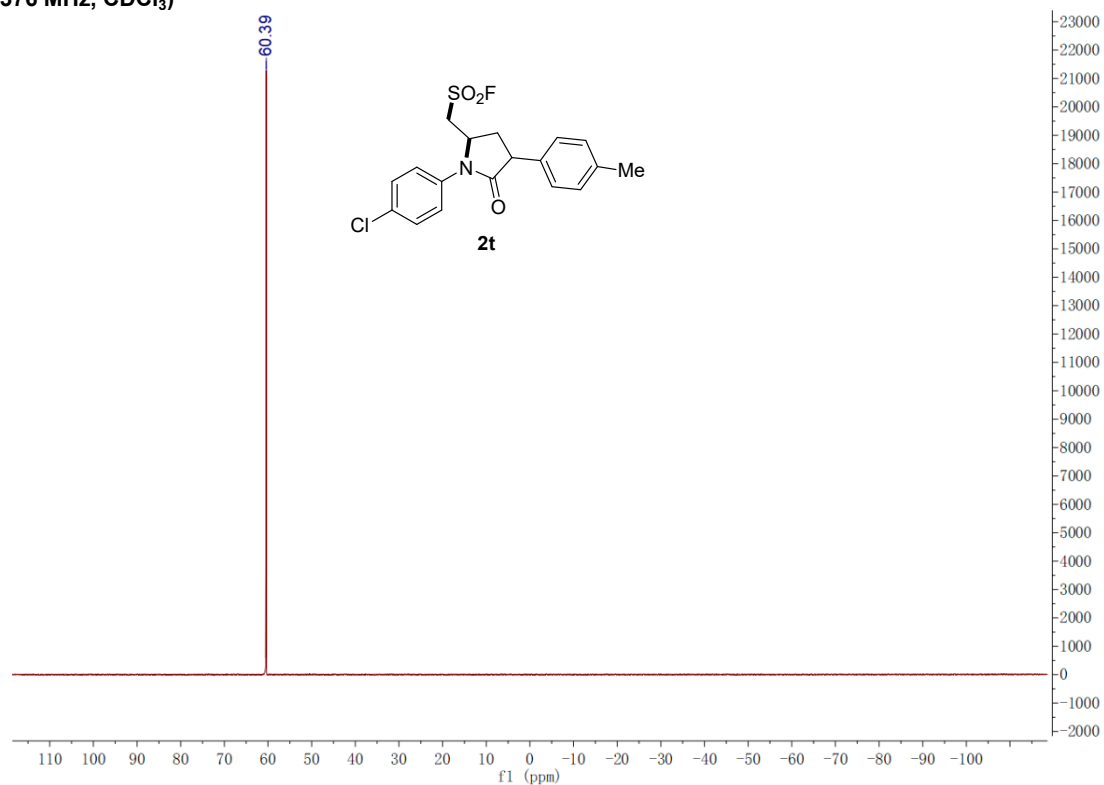

**<sup>1</sup>H-NMR (400 MHz, CDCl<sub>3</sub>)**

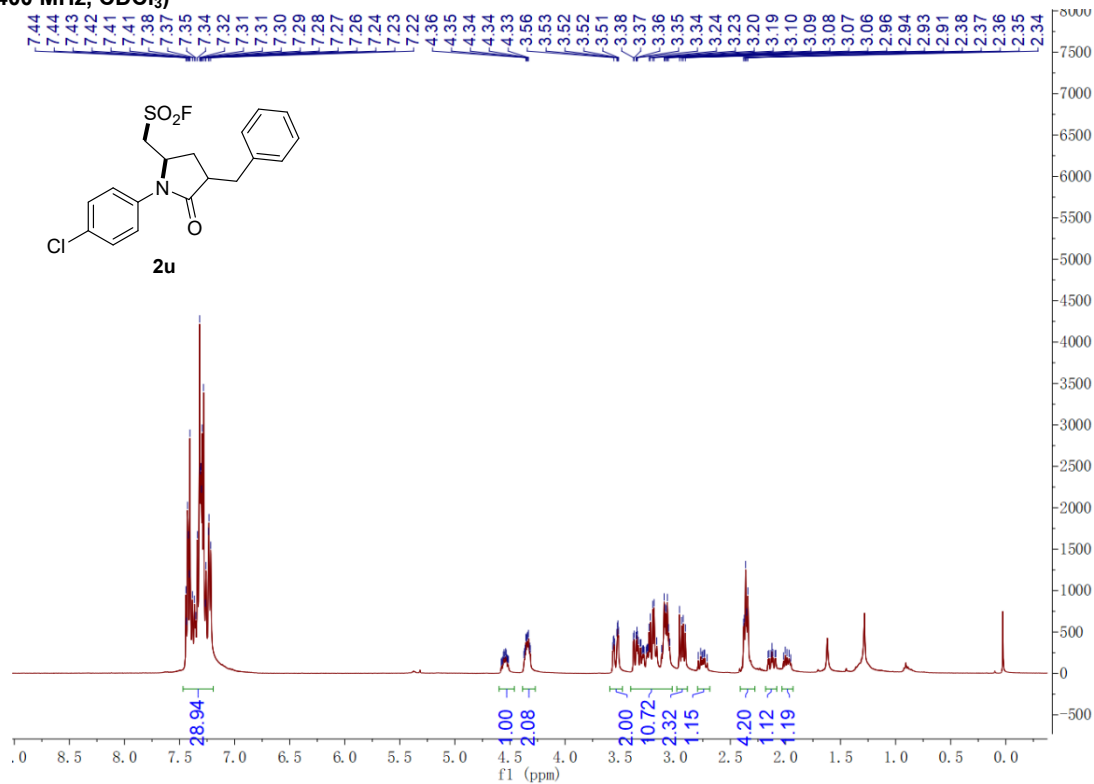

**<sup>13</sup>C-NMR (126 MHz, CDCl<sub>3</sub>)**

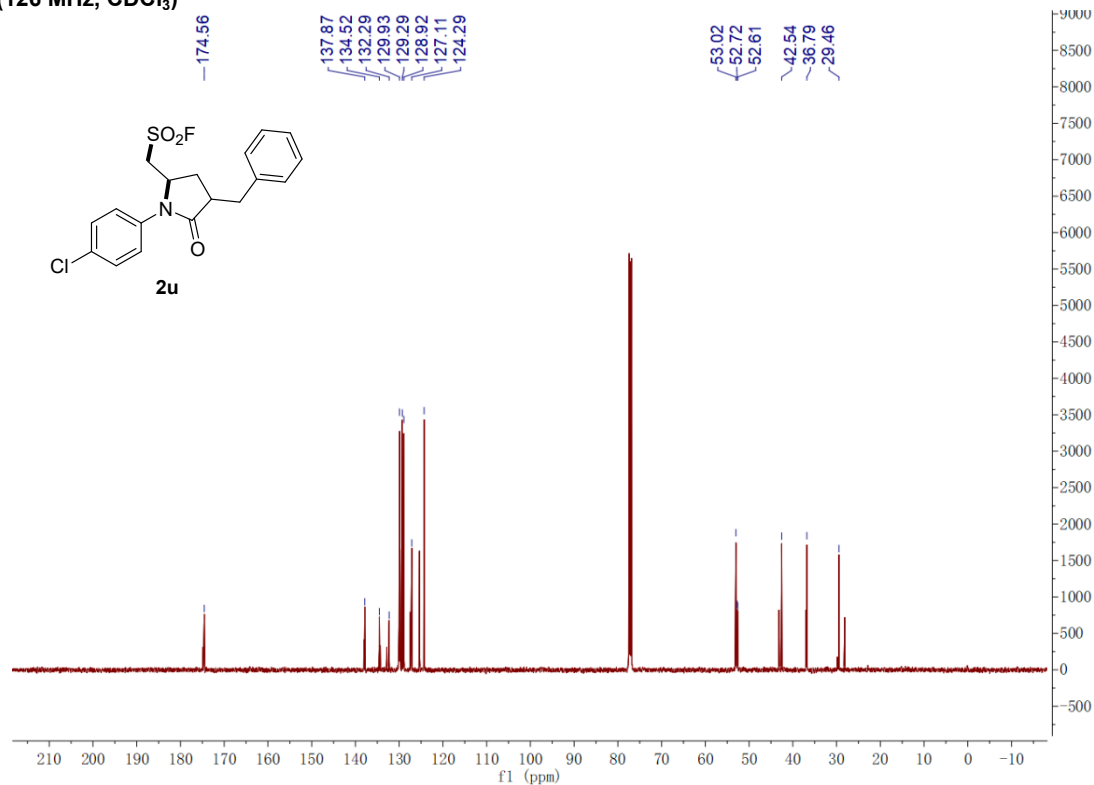



<sup>19</sup>F NMR (376 MHz, CDCl<sub>3</sub>)

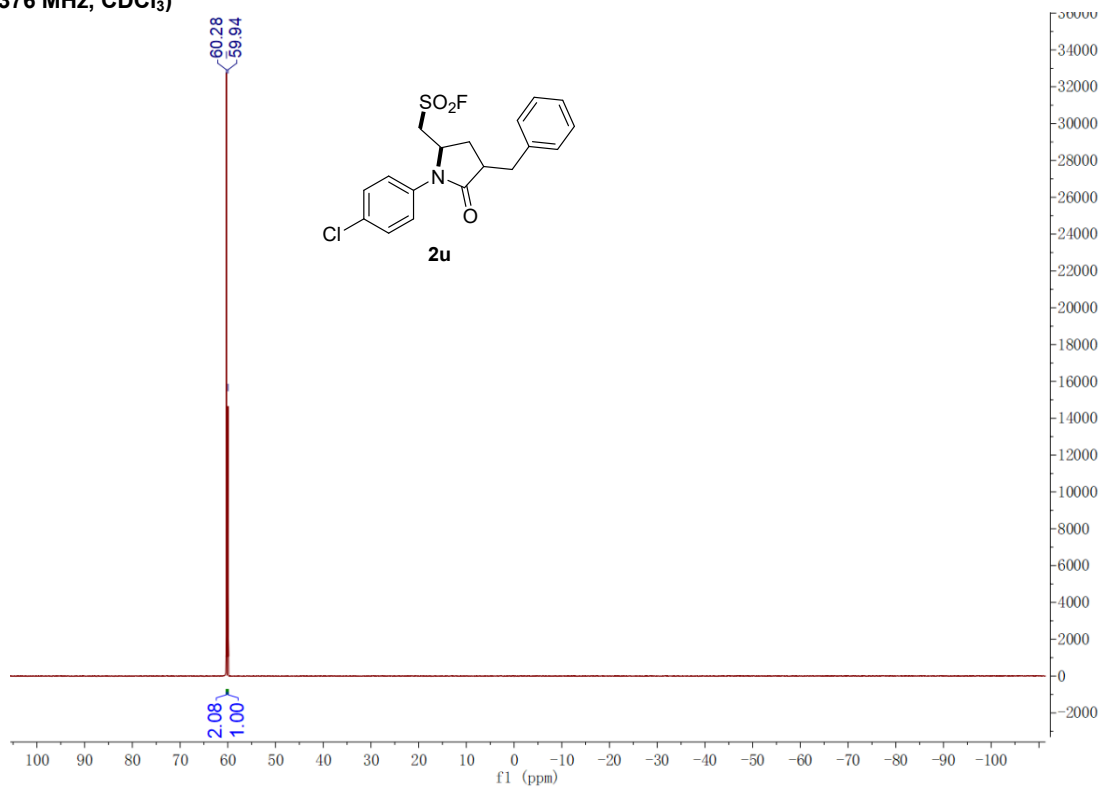

<sup>1</sup>H-NMR (400 MHz, CDCl<sub>3</sub>)

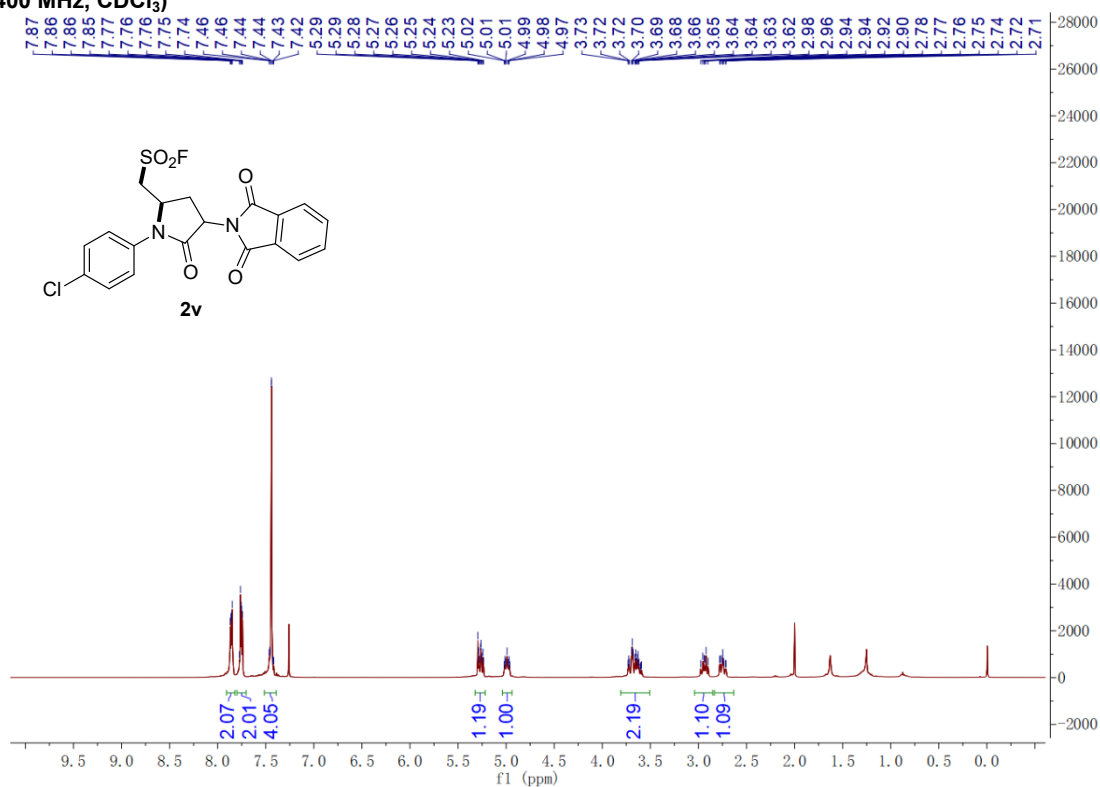

**$^{13}\text{C}$ -NMR (101 MHz,  $\text{CDCl}_3$ )**

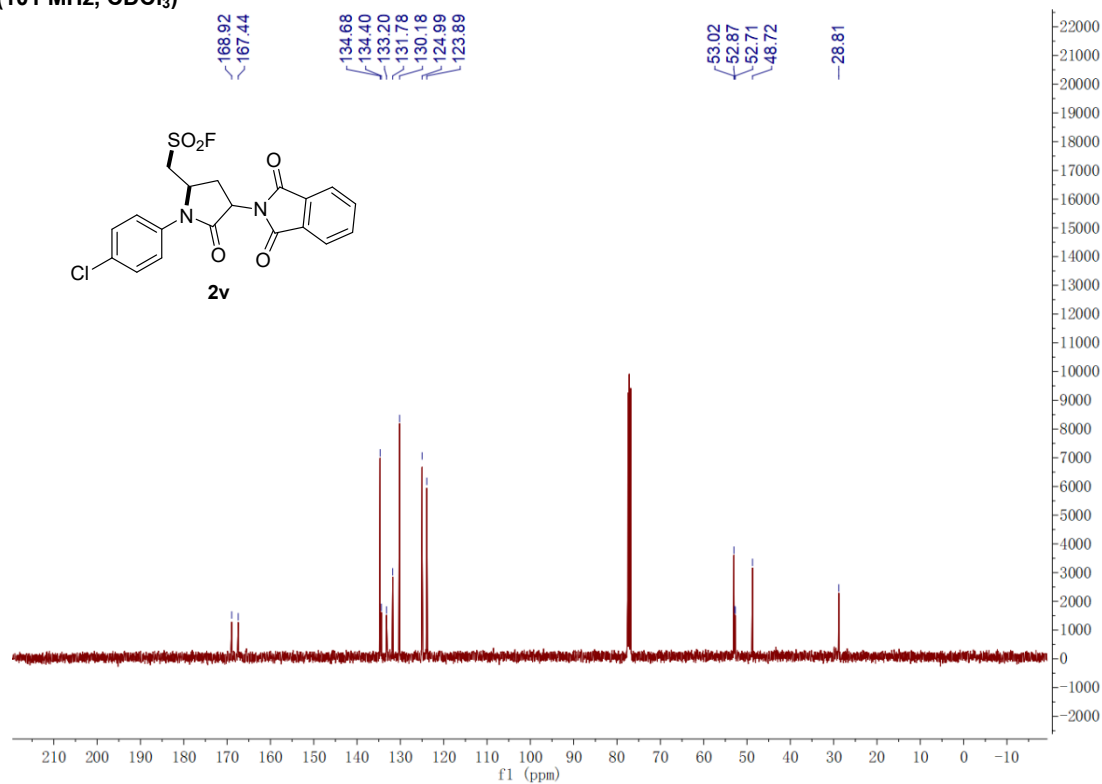

**$^{19}\text{F}$  NMR (376 MHz,  $\text{CDCl}_3$ )**

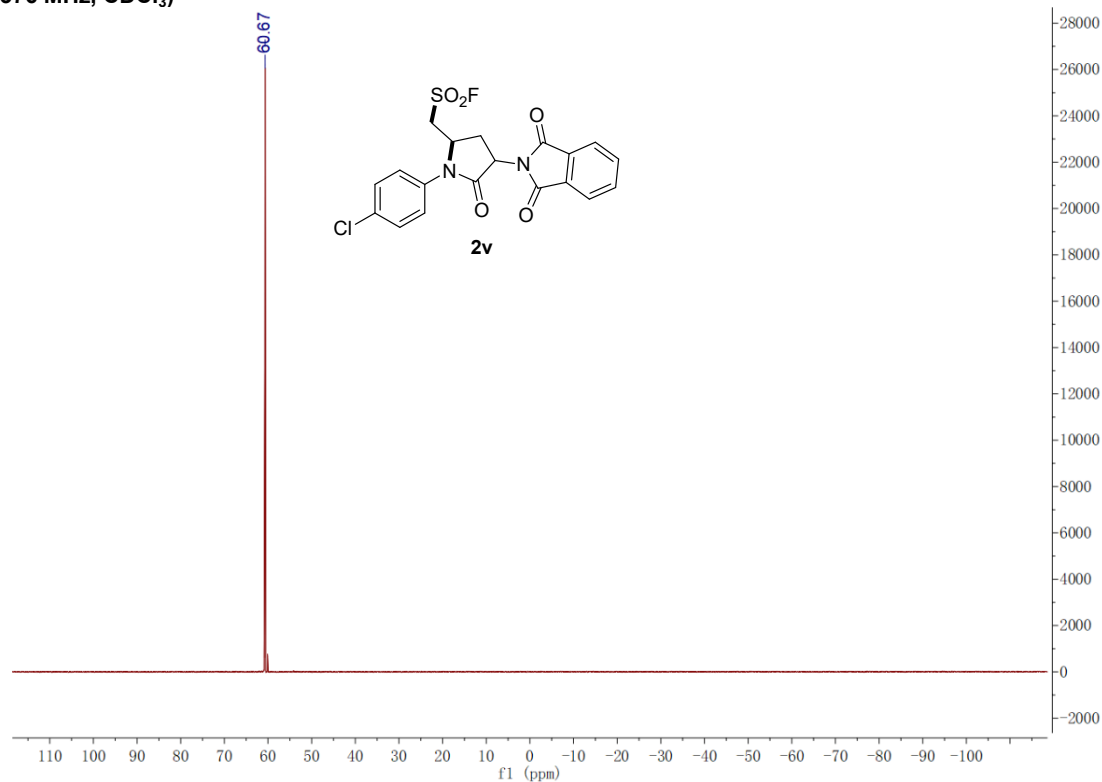

**<sup>1</sup>H-NMR (400 MHz, CDCl<sub>3</sub>)**

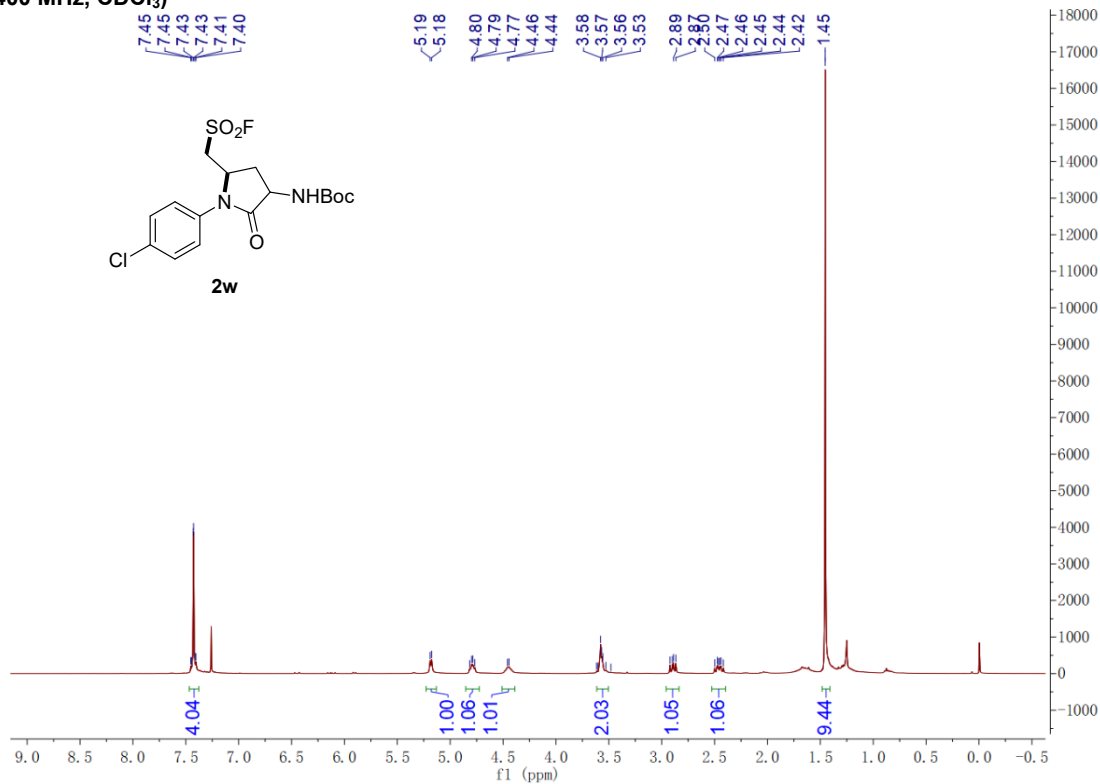

**<sup>13</sup>C-NMR (126 MHz, CDCl<sub>3</sub>)**

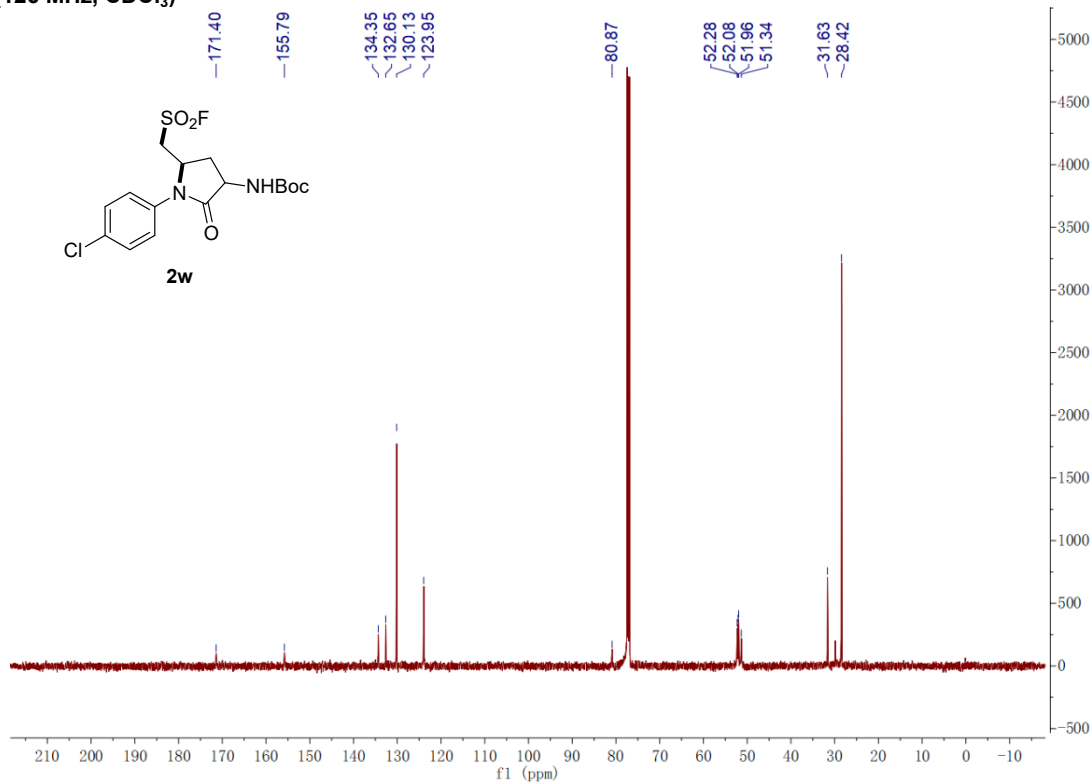

**<sup>19</sup>F NMR (376 MHz, CDCl<sub>3</sub>)**

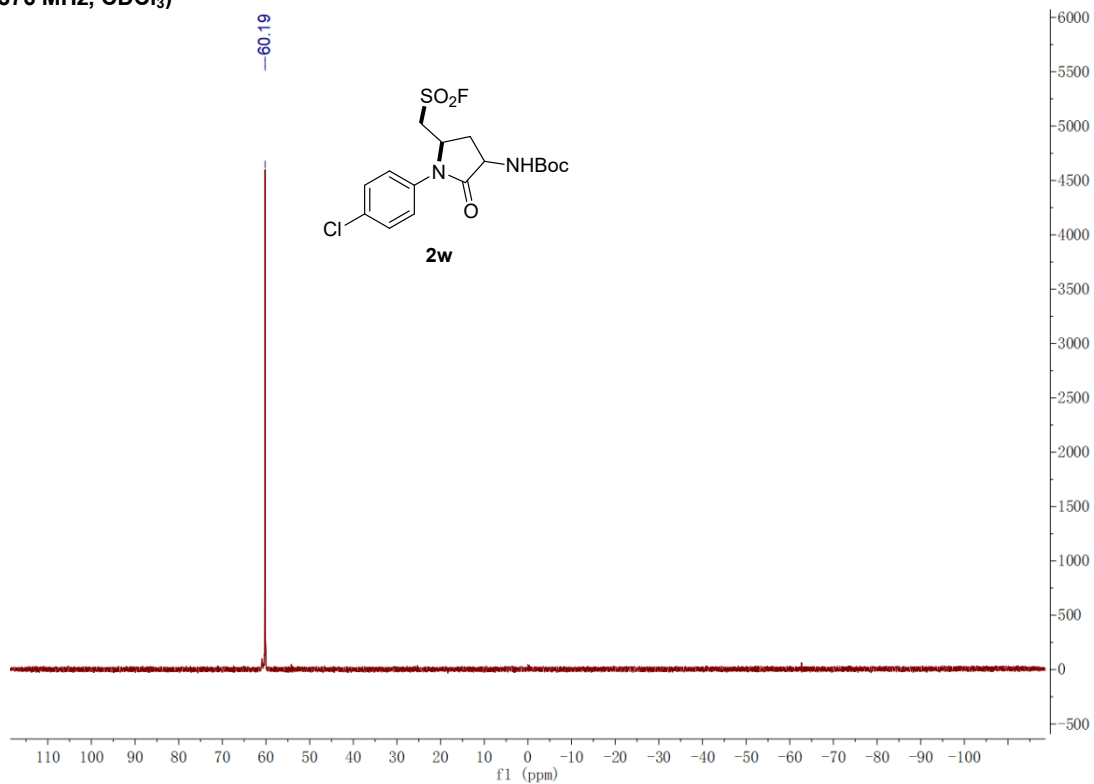<sup>1</sup>H-NMR (500 MHz, DMSO-*d*<sub>6</sub>)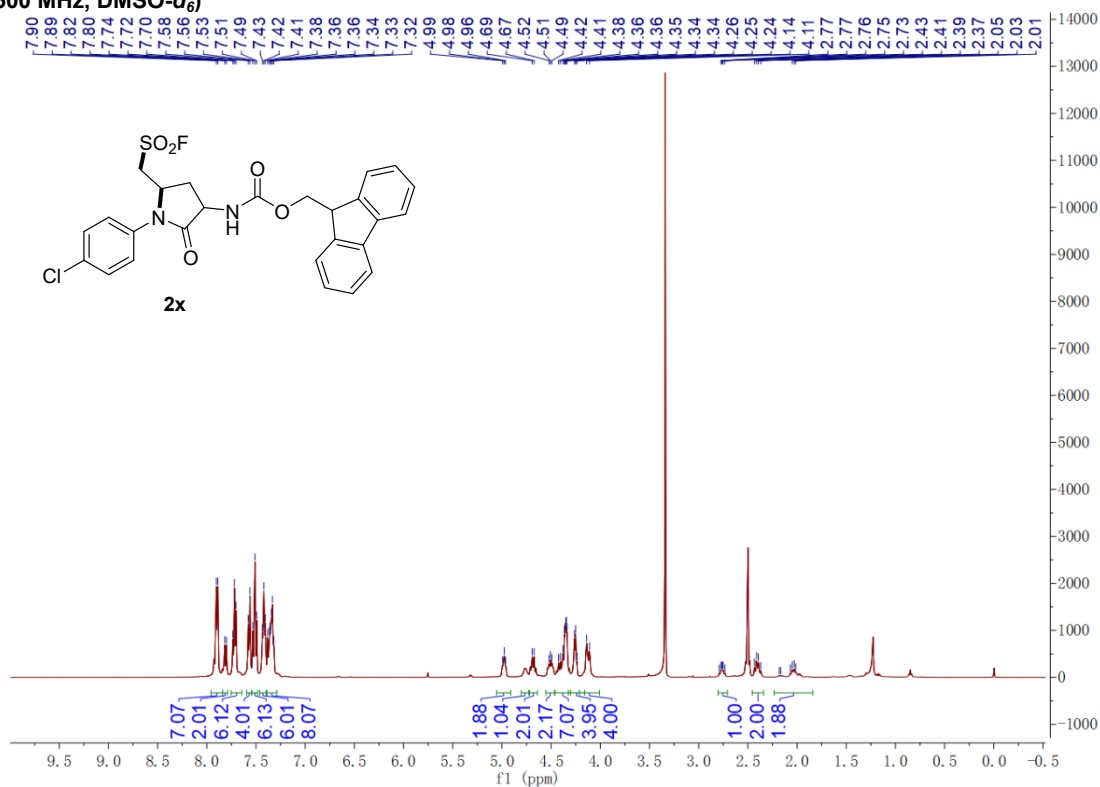

**<sup>13</sup>C-NMR (126 MHz, DMSO-*d*<sub>6</sub>)**

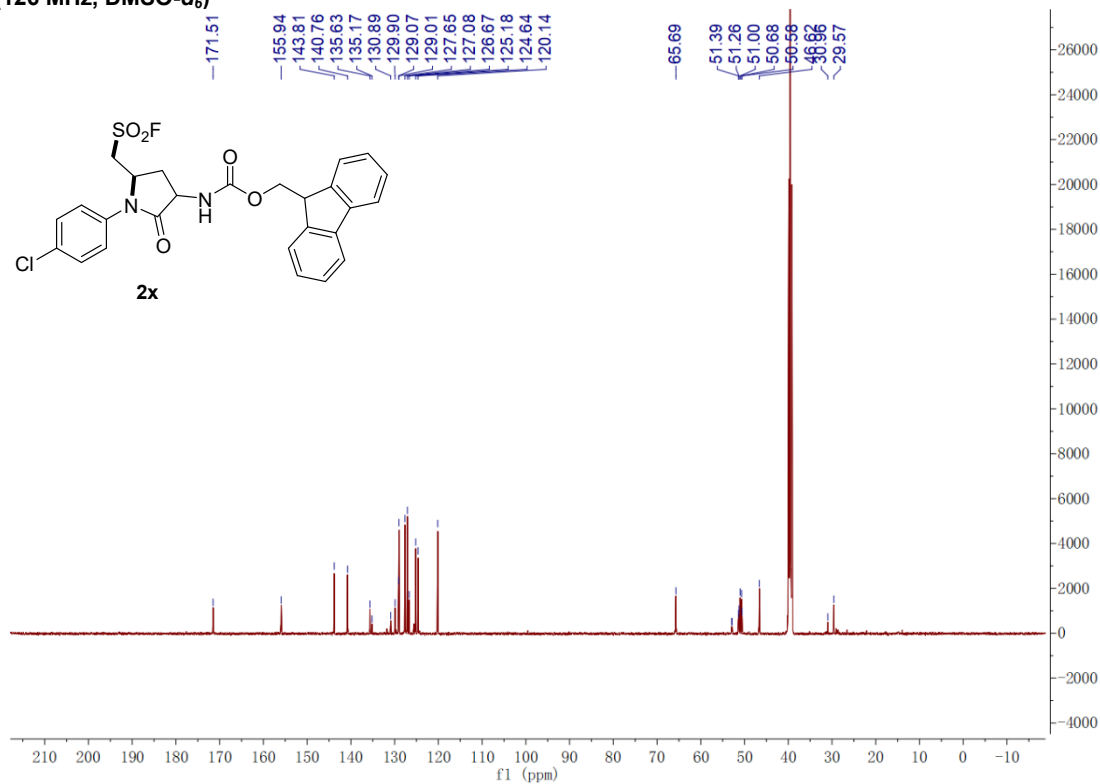

**<sup>19</sup>F NMR (376 MHz, DMSO-*d*<sub>6</sub>)**

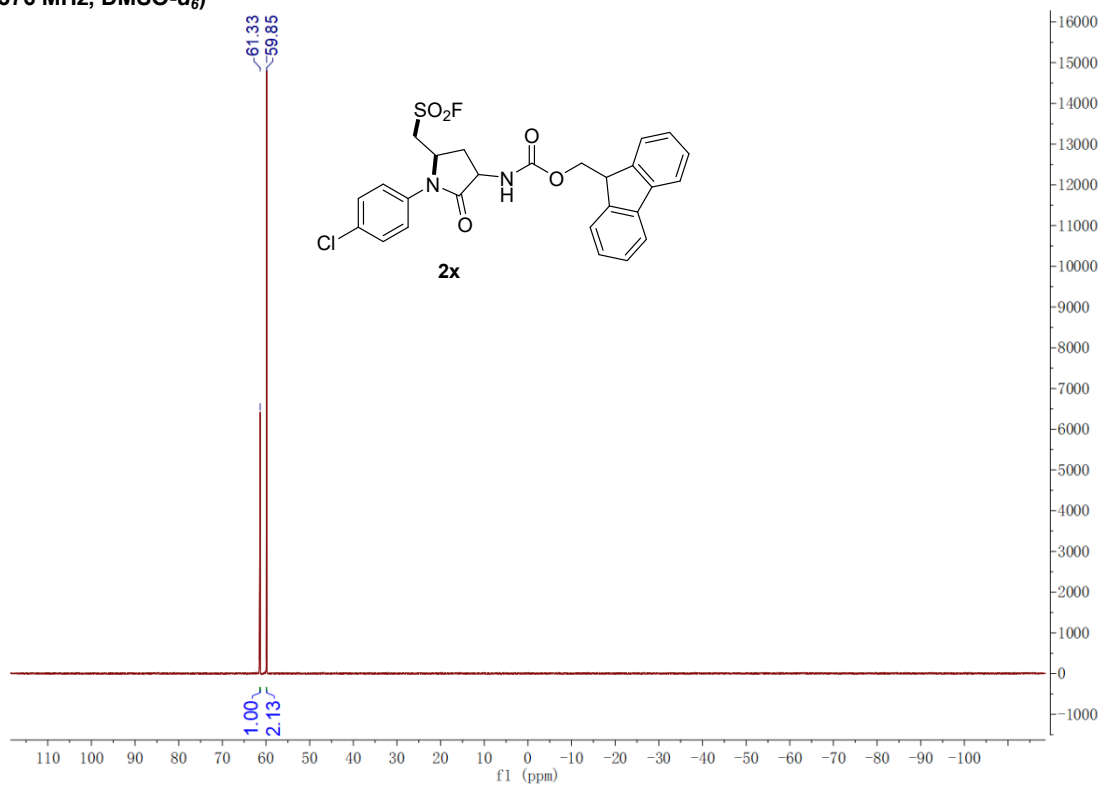

**<sup>1</sup>H-NMR (400 MHz, CDCl<sub>3</sub>)**

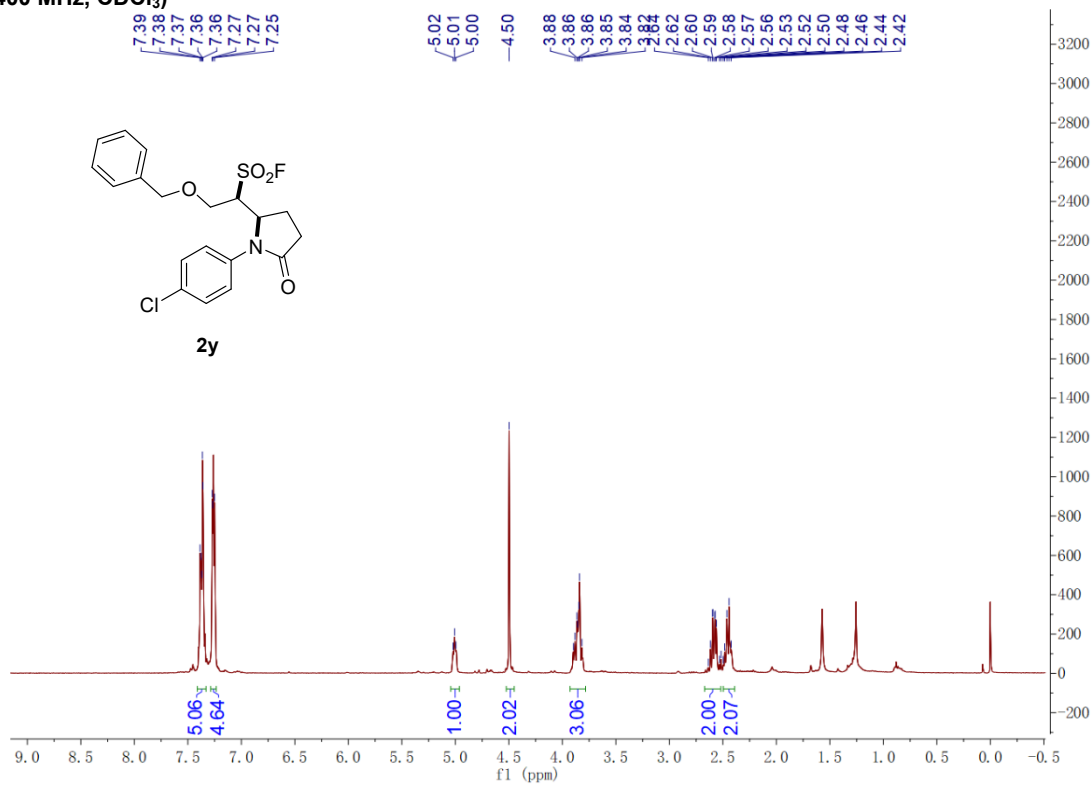

**<sup>13</sup>C-NMR (101 MHz, CDCl<sub>3</sub>)**

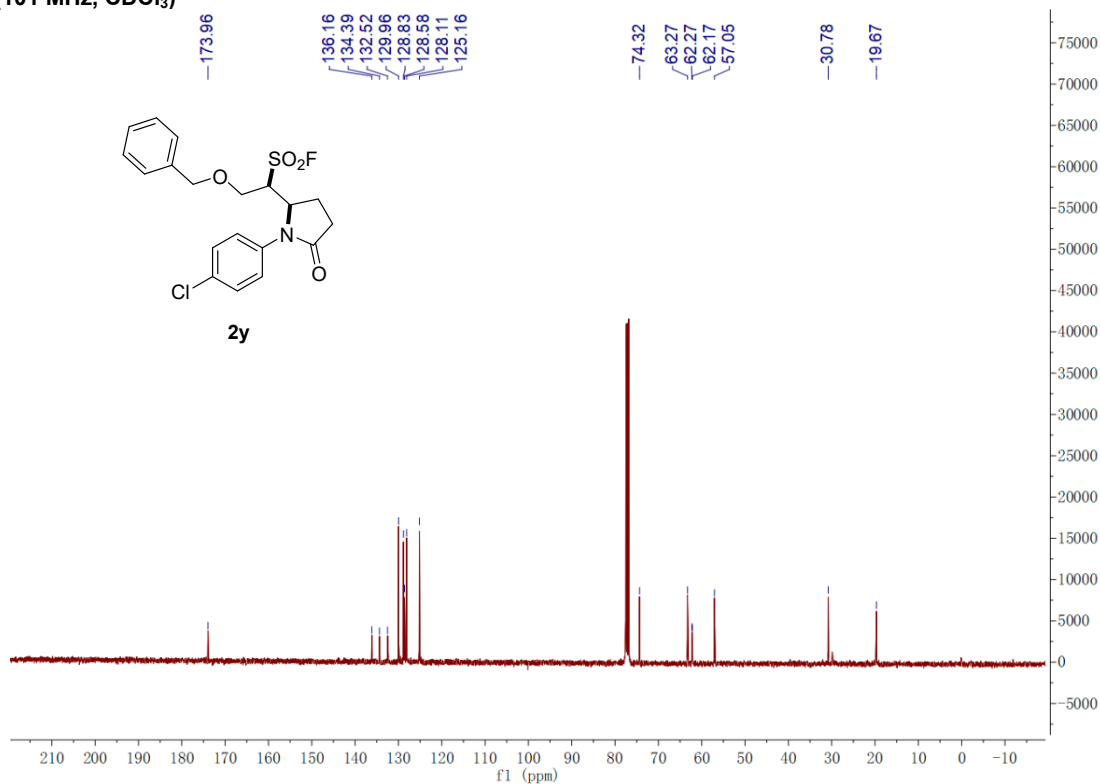

**$^{19}\text{F}$  NMR (376 MHz,  $\text{CDCl}_3$ )**

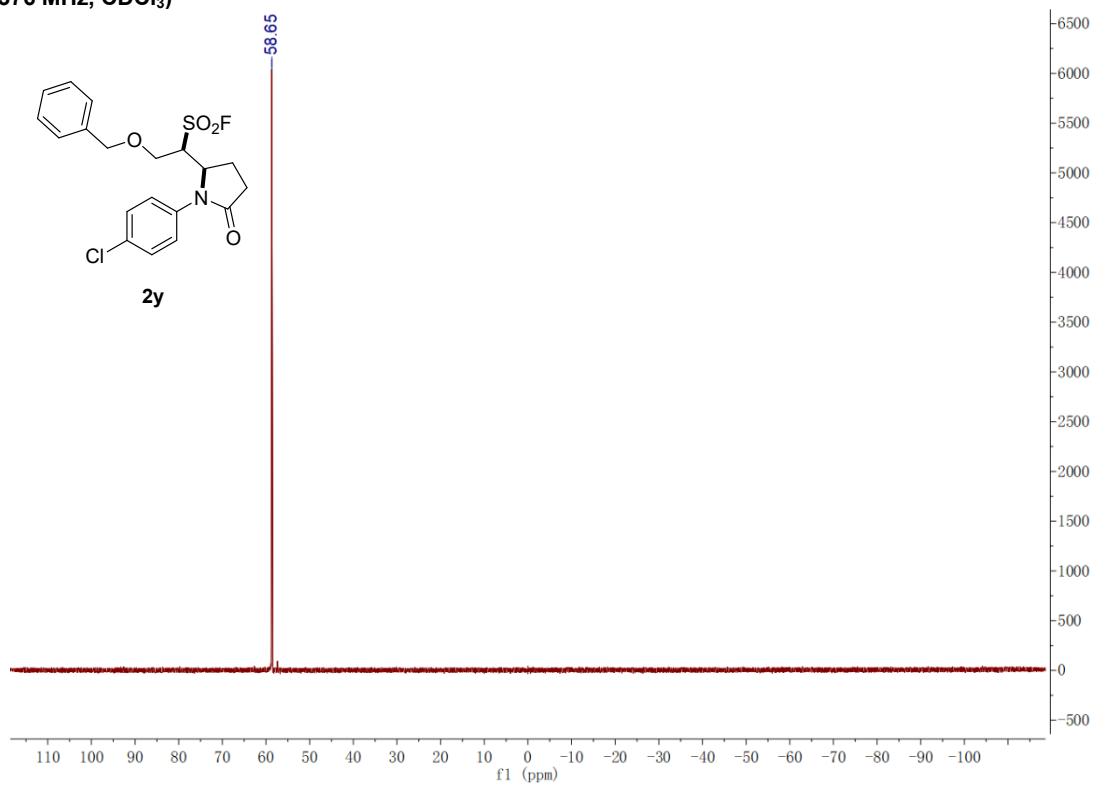

**$^1\text{H}$ -NMR (400 MHz,  $\text{CDCl}_3$ )**

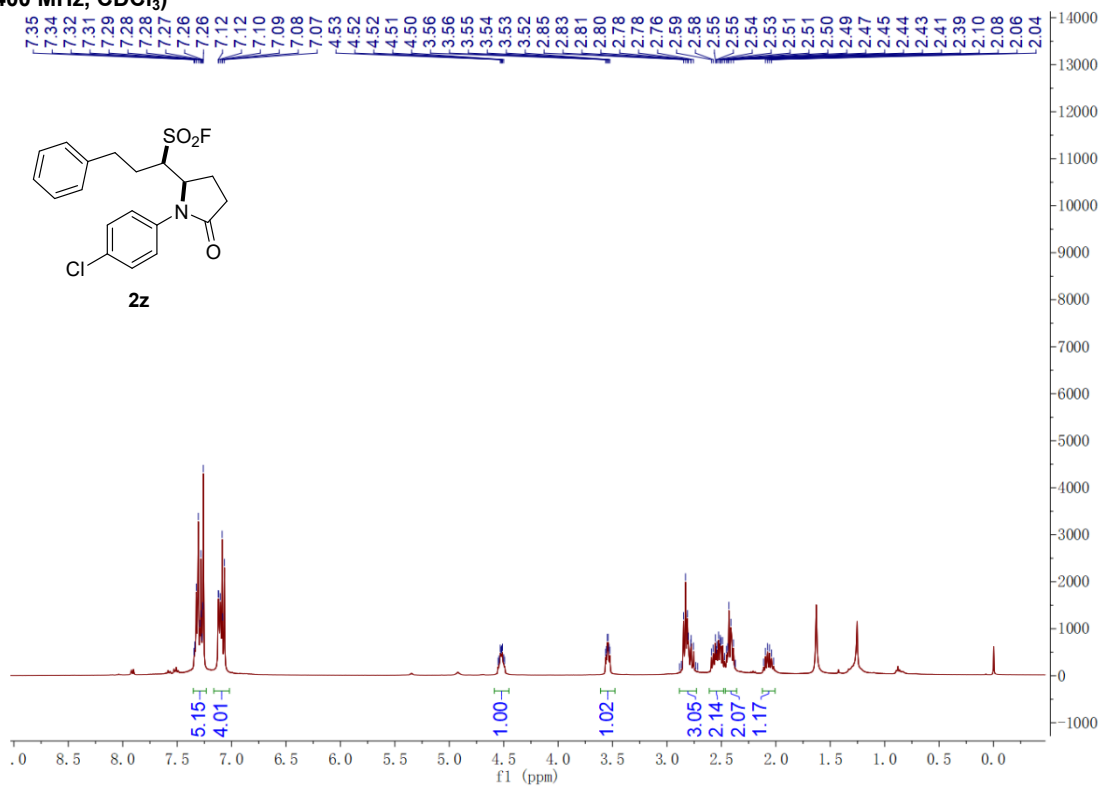

**<sup>13</sup>C-NMR (101 MHz, CDCl<sub>3</sub>)**

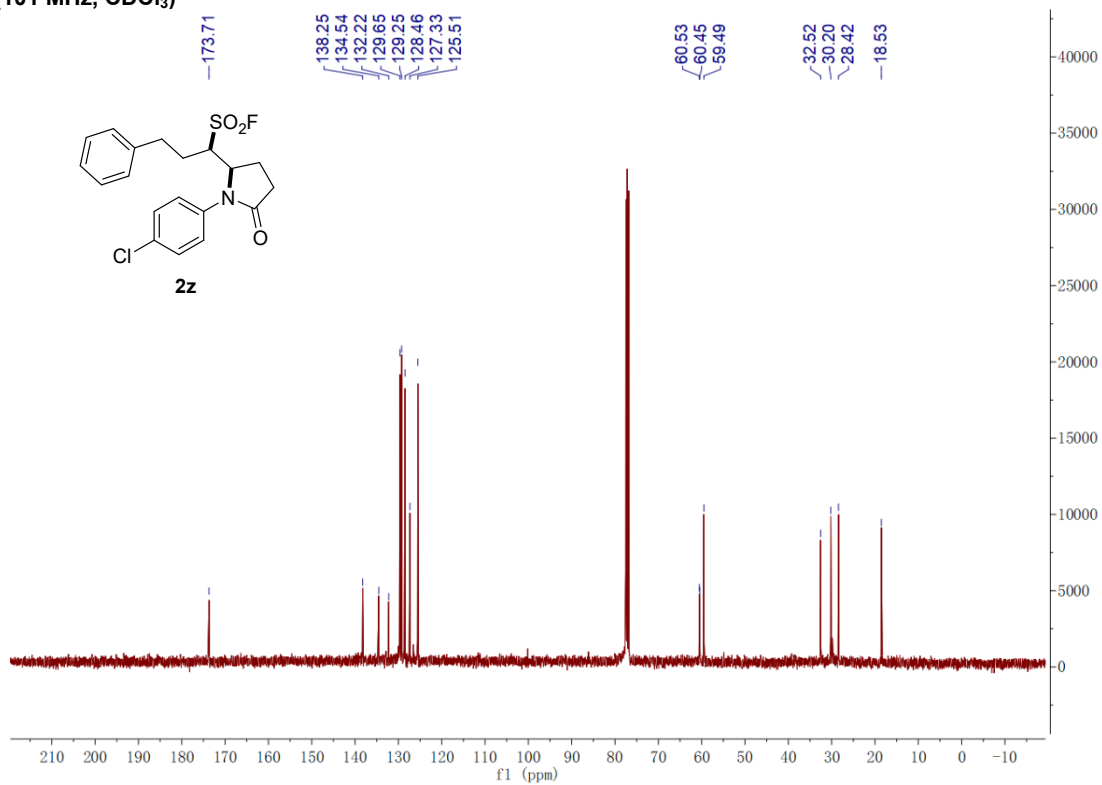

**<sup>19</sup>F NMR (376 MHz, CDCl<sub>3</sub>)**

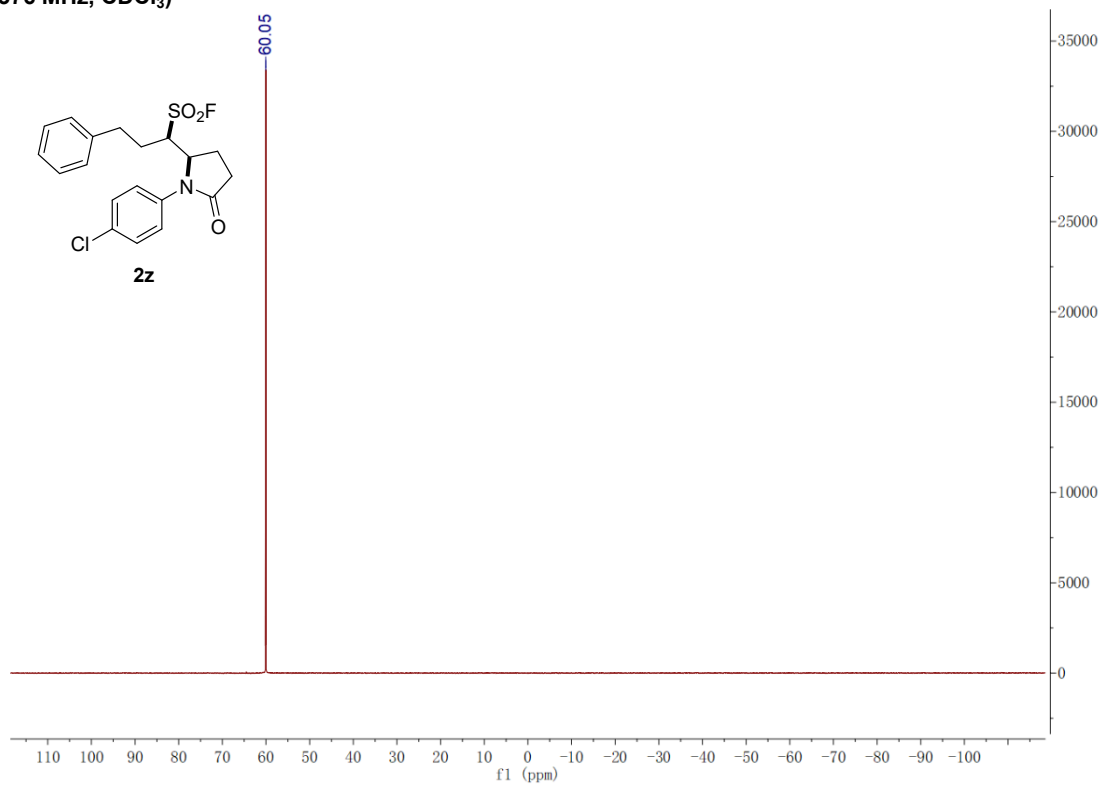



**<sup>1</sup>H-NMR (400 MHz, CDCl<sub>3</sub>)**

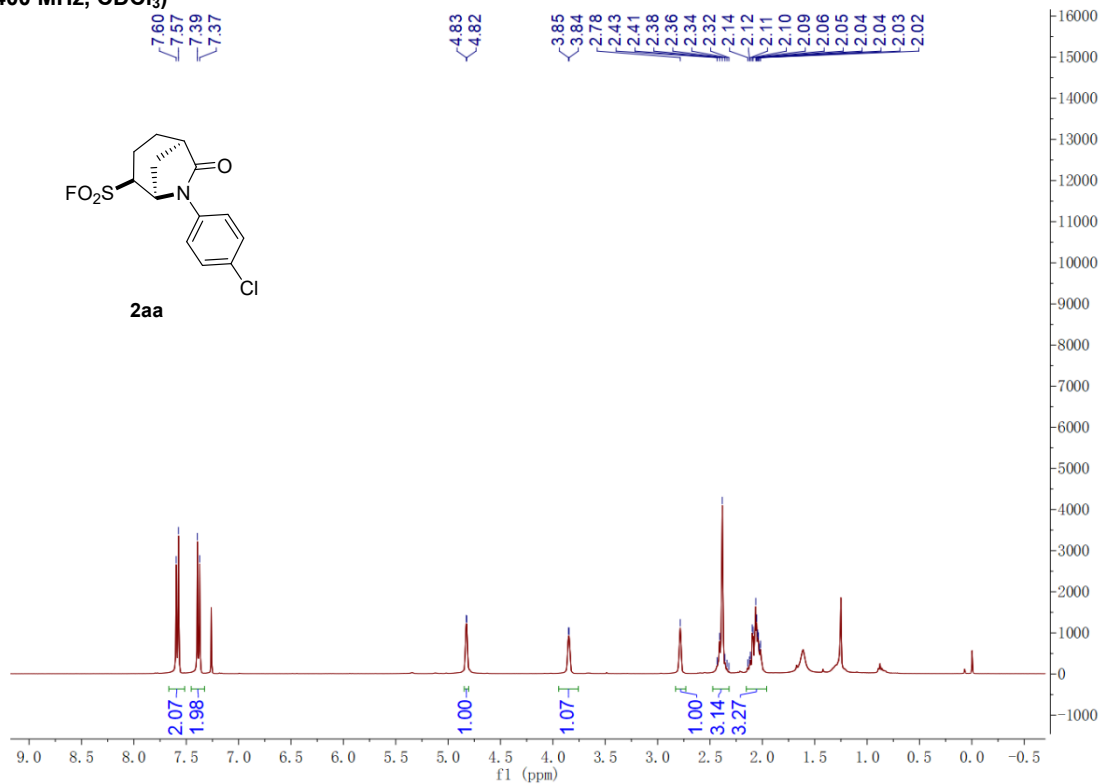

**<sup>13</sup>C-NMR (101 MHz, CDCl<sub>3</sub>)**

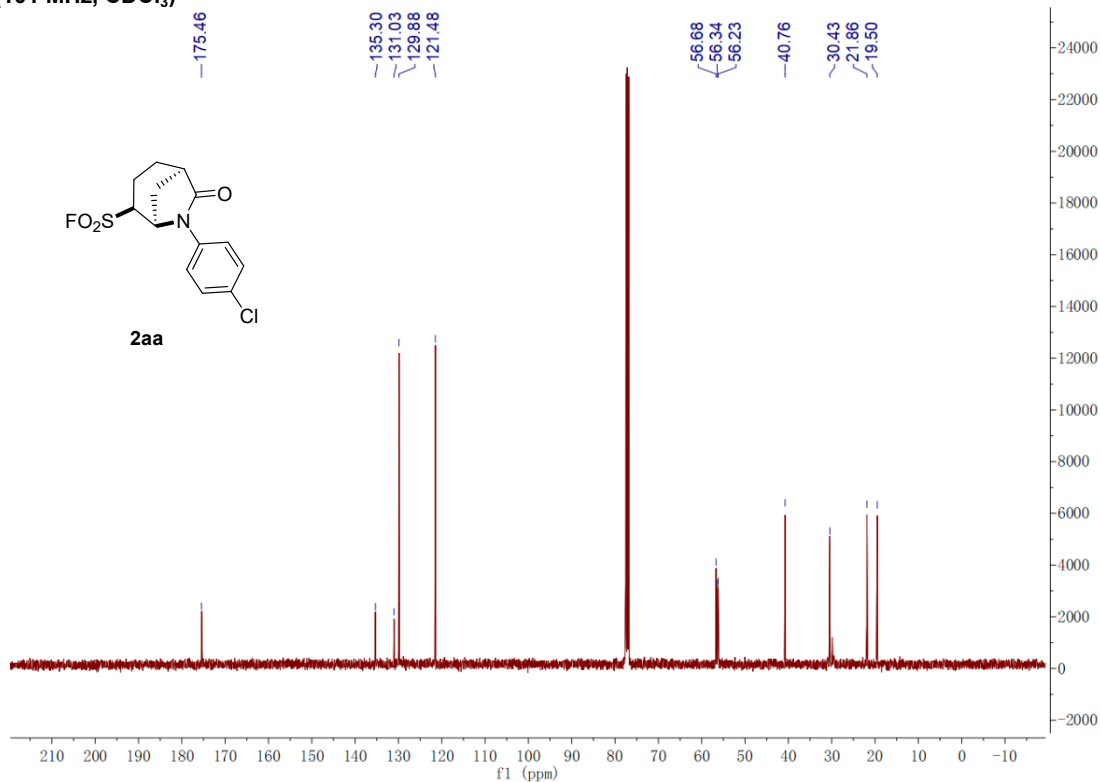

**<sup>19</sup>F NMR (376 MHz, CDCl<sub>3</sub>)**

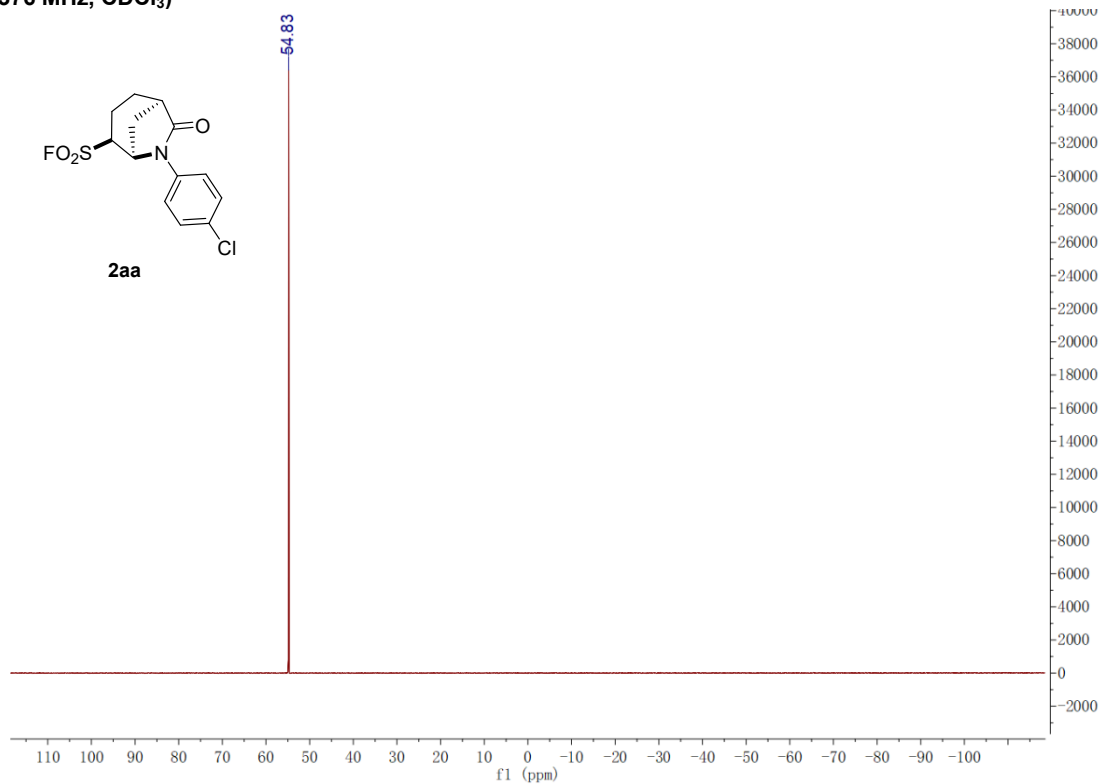

**<sup>1</sup>H-NMR (400 MHz, CDCl<sub>3</sub>)**

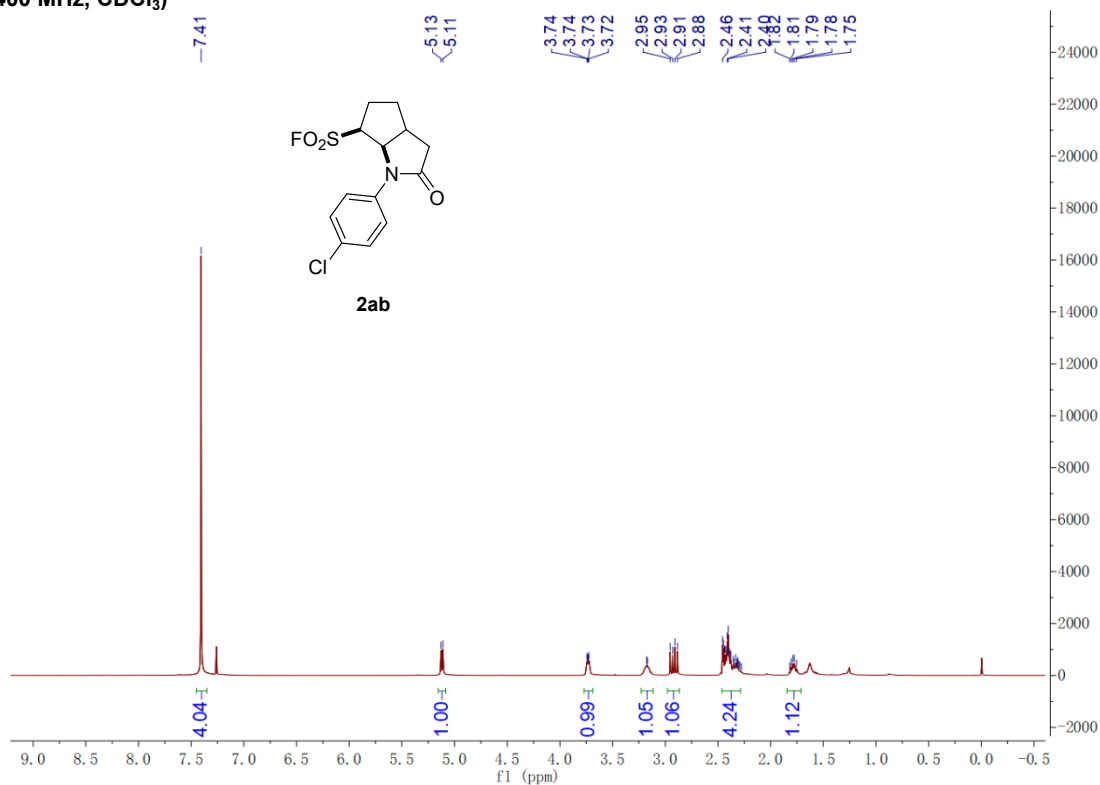

**<sup>13</sup>C-NMR (101 MHz, CDCl<sub>3</sub>)**

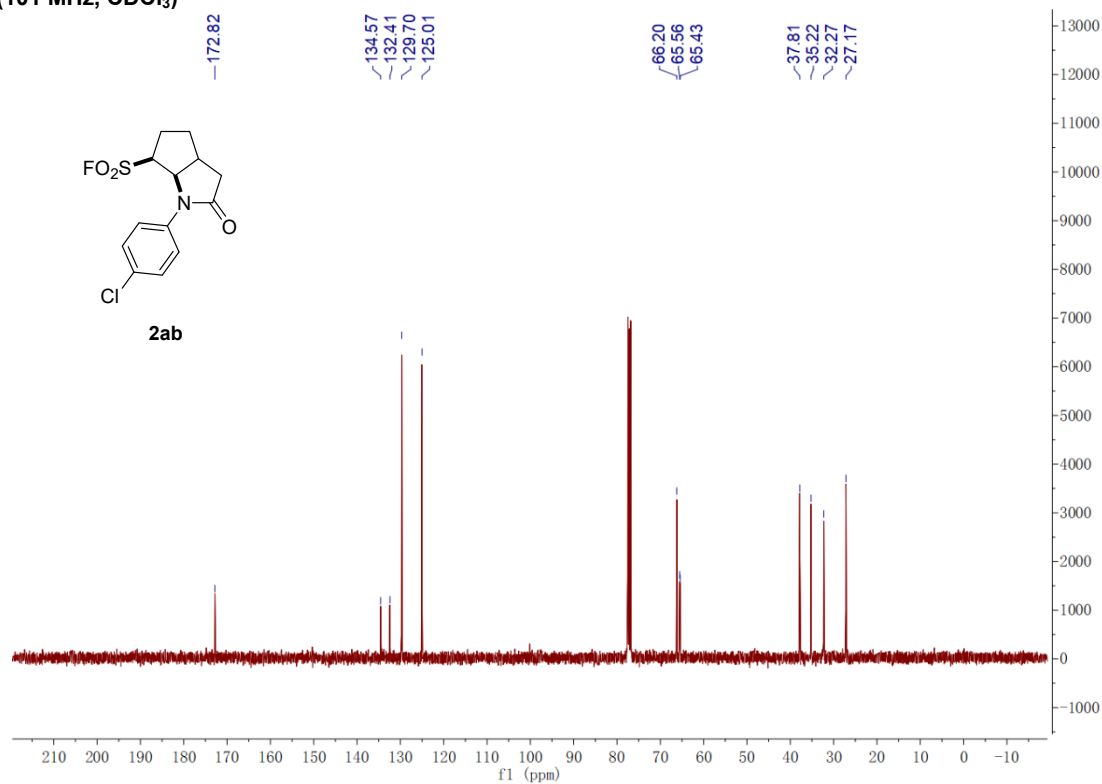

**<sup>19</sup>F NMR (376 MHz, CDCl<sub>3</sub>)**

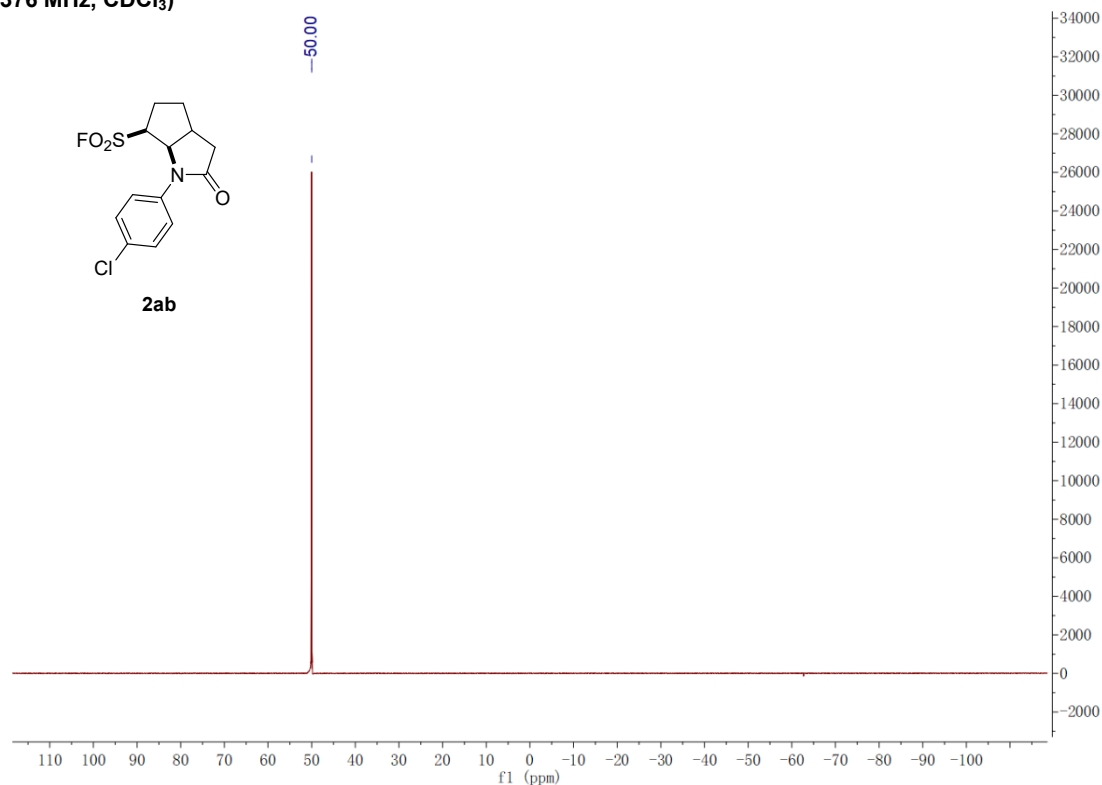

**<sup>1</sup>H-NMR (400 MHz, CDCl<sub>3</sub>)**

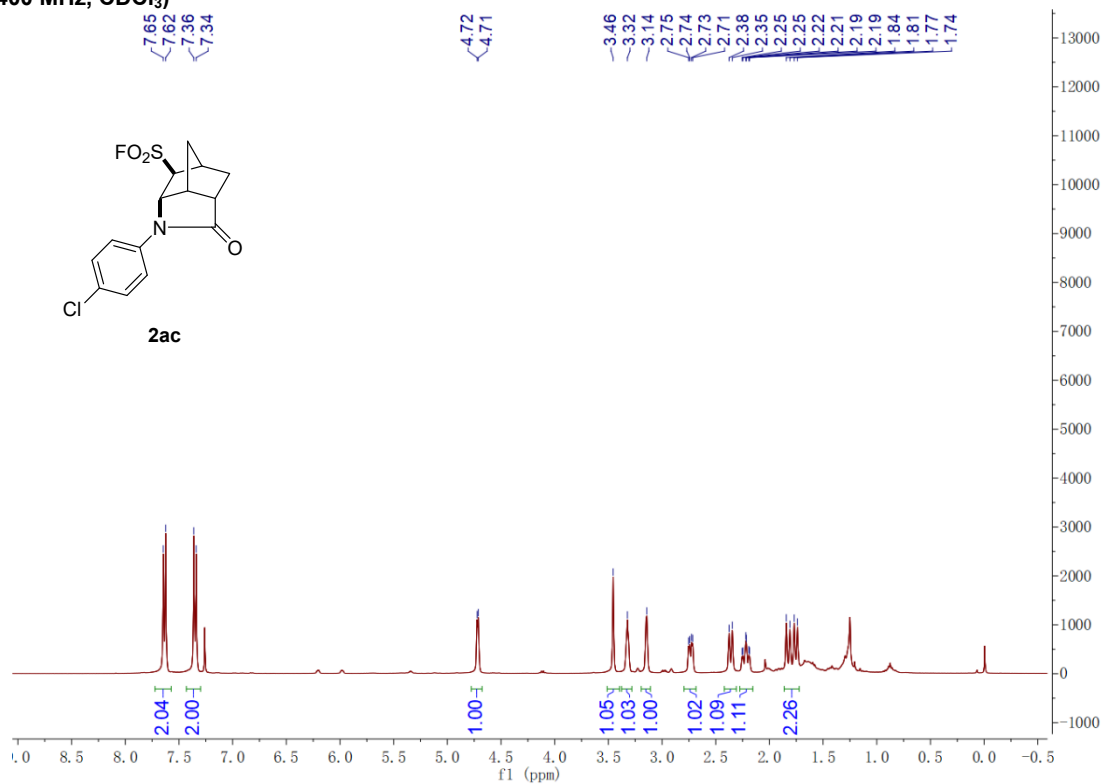

**<sup>13</sup>C-NMR (126 MHz, CDCl<sub>3</sub>)**

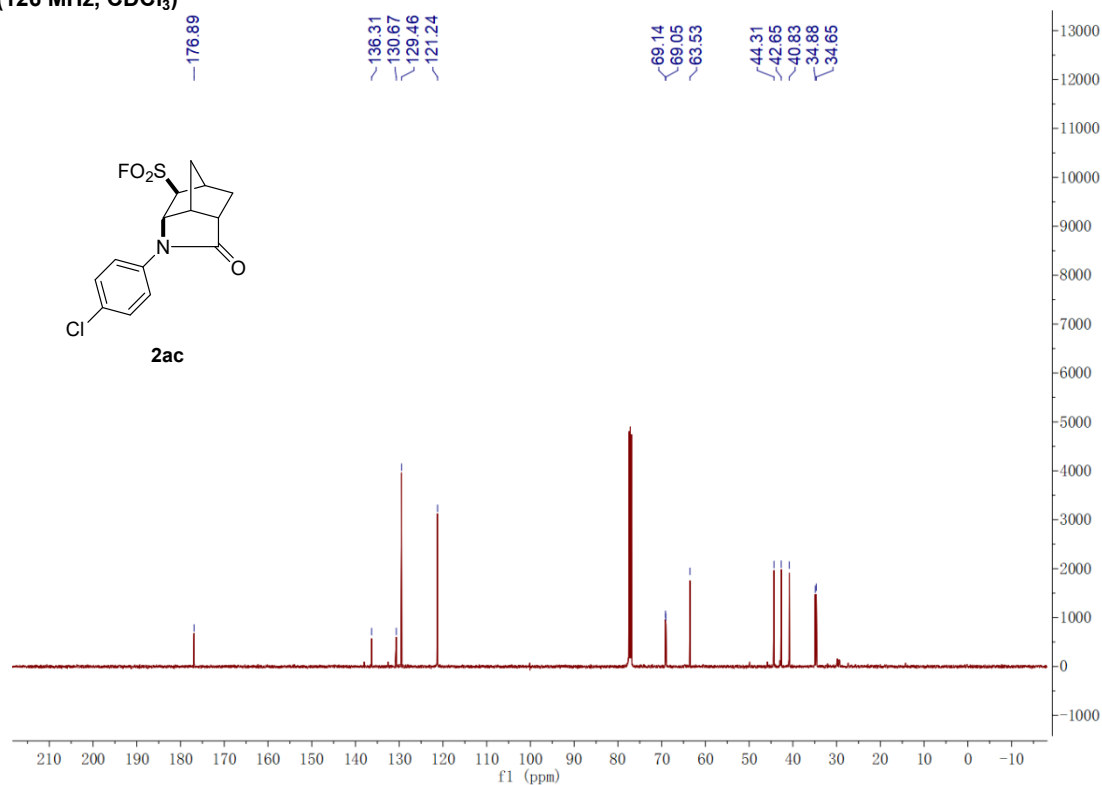

**<sup>19</sup>F NMR (376 MHz, CDCl<sub>3</sub>)**

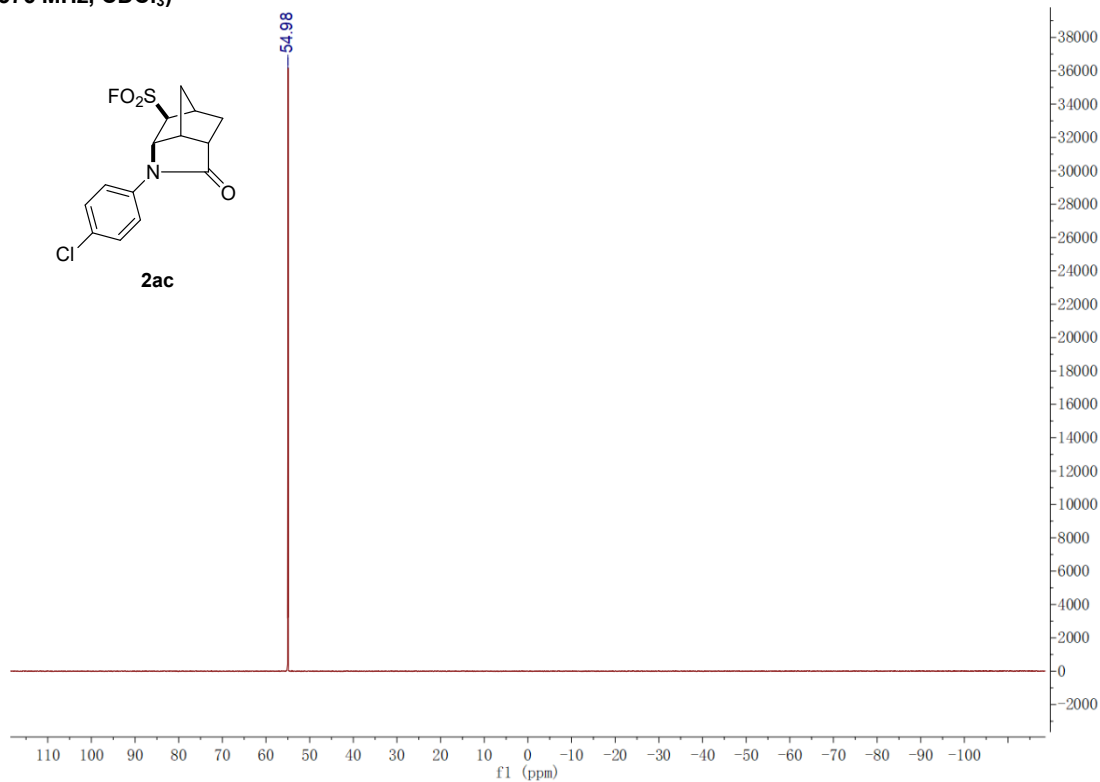

**<sup>1</sup>H-NMR (400 MHz, CDCl<sub>3</sub>)**

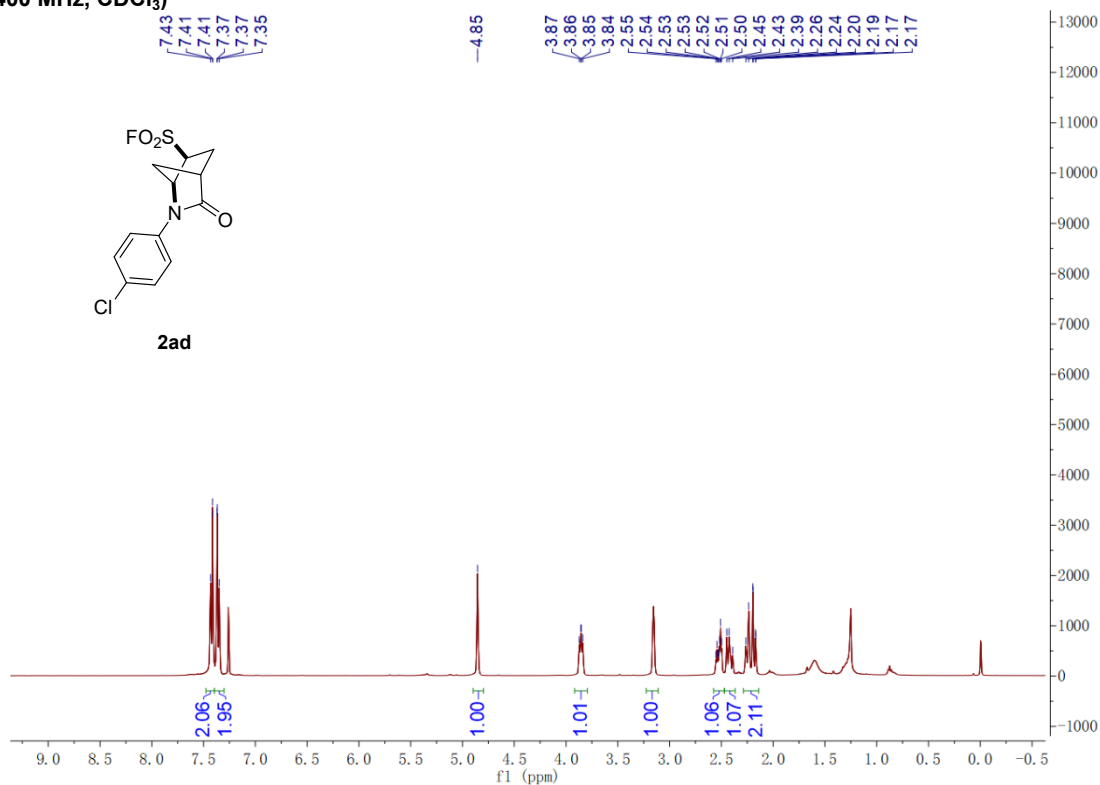

**$^{13}\text{C}$ -NMR (101 MHz,  $\text{CDCl}_3$ )**

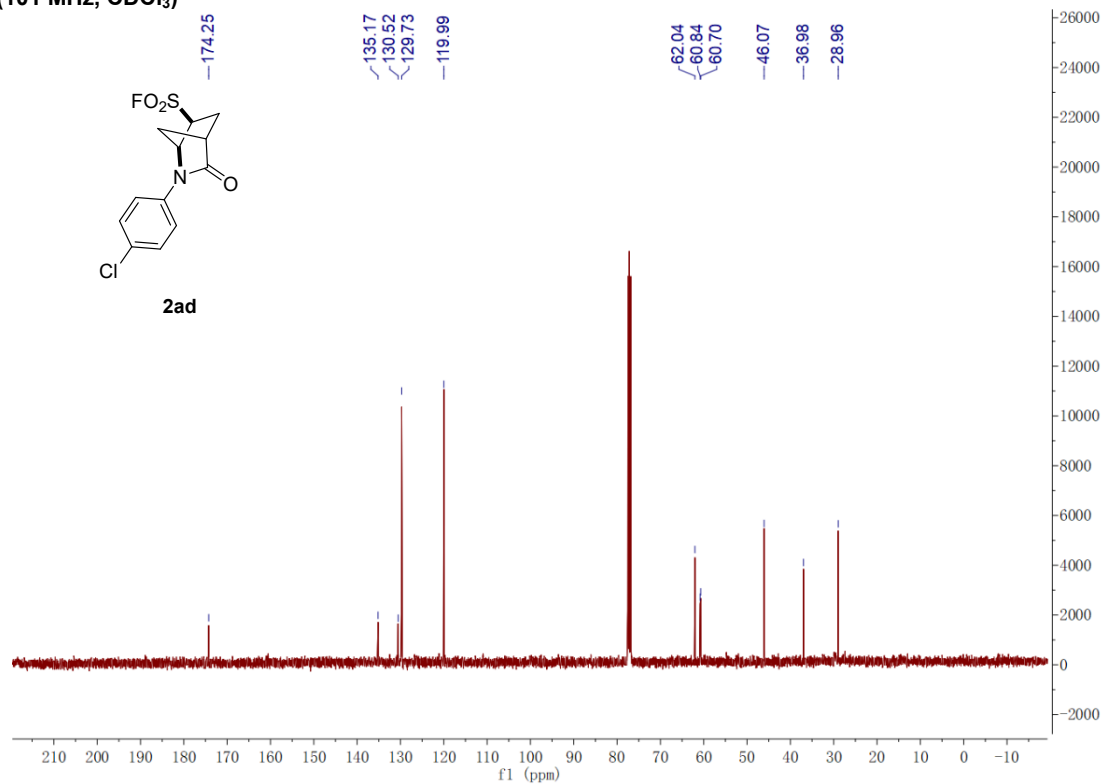

**$^{19}\text{F}$  NMR (376 MHz,  $\text{CDCl}_3$ )**

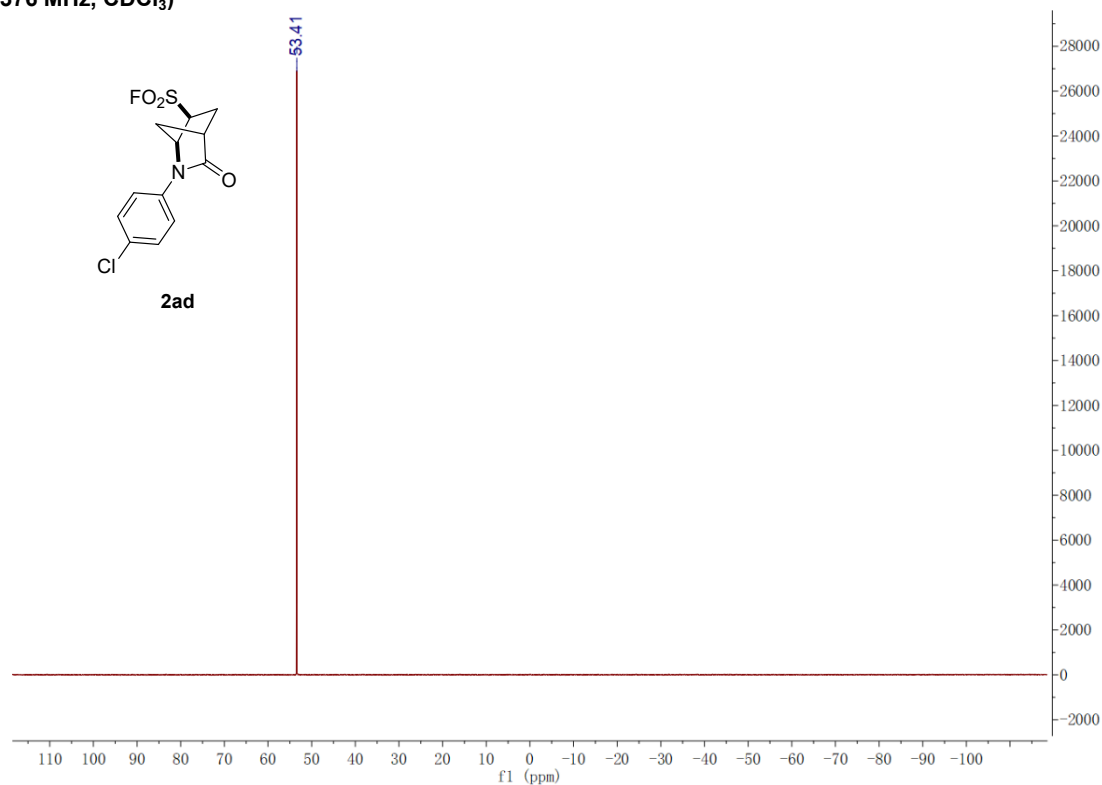

**<sup>1</sup>H-NMR (400 MHz, CDCl<sub>3</sub>)**

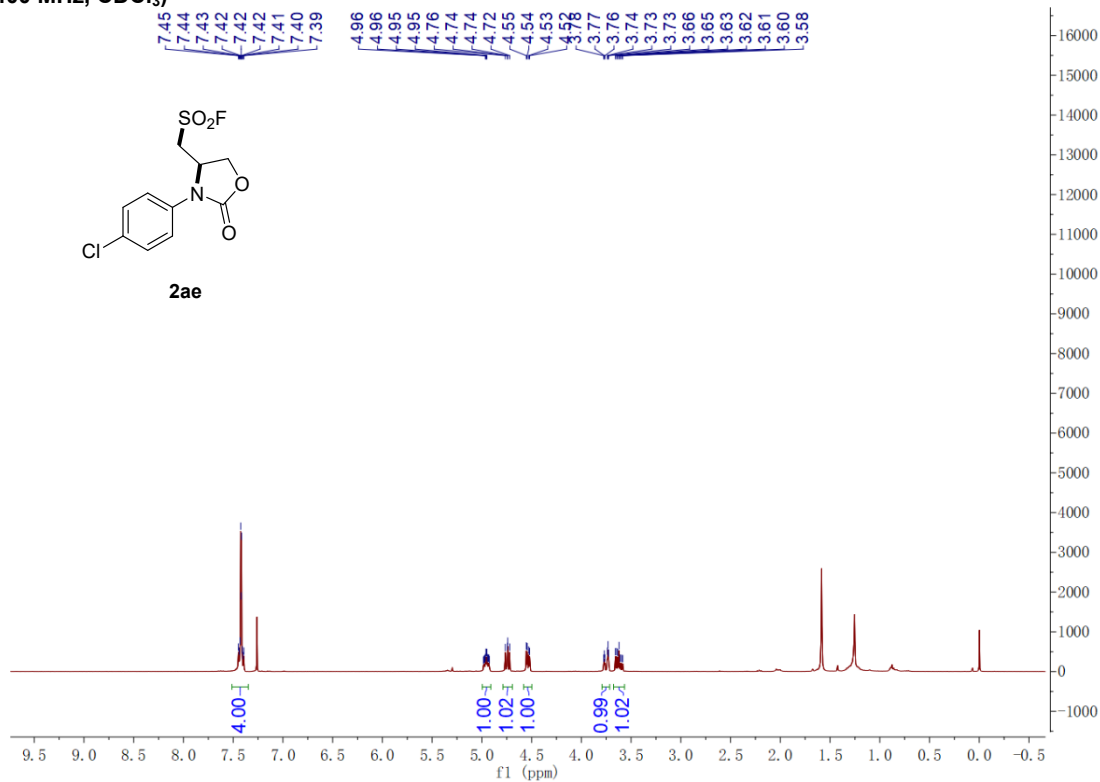

**<sup>13</sup>C-NMR (101 MHz, CDCl<sub>3</sub>)**

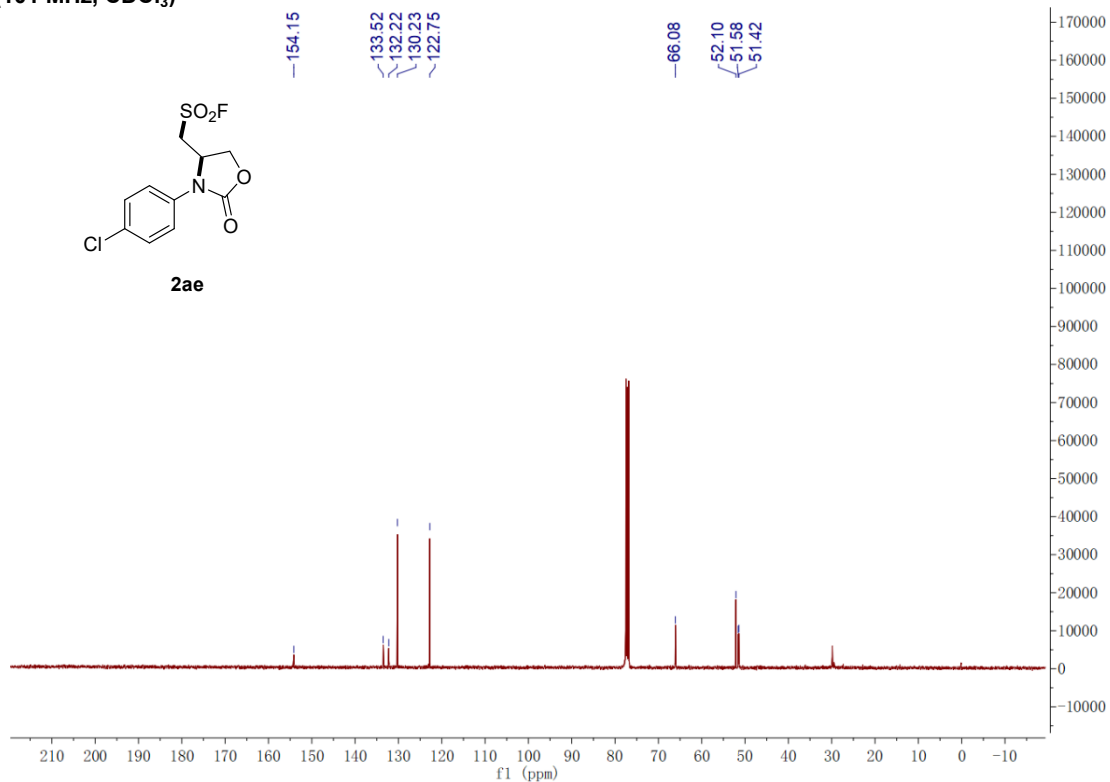

**<sup>19</sup>F NMR (376 MHz, CDCl<sub>3</sub>)**

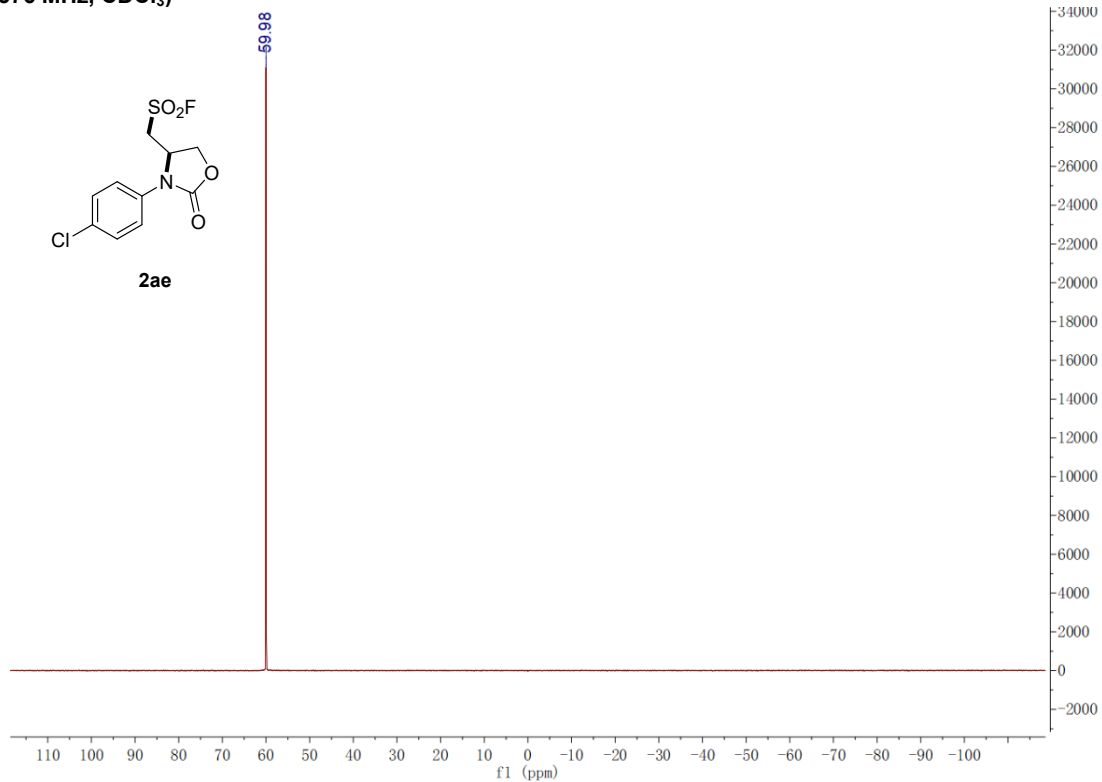

**<sup>1</sup>H-NMR (400 MHz, CDCl<sub>3</sub>)**

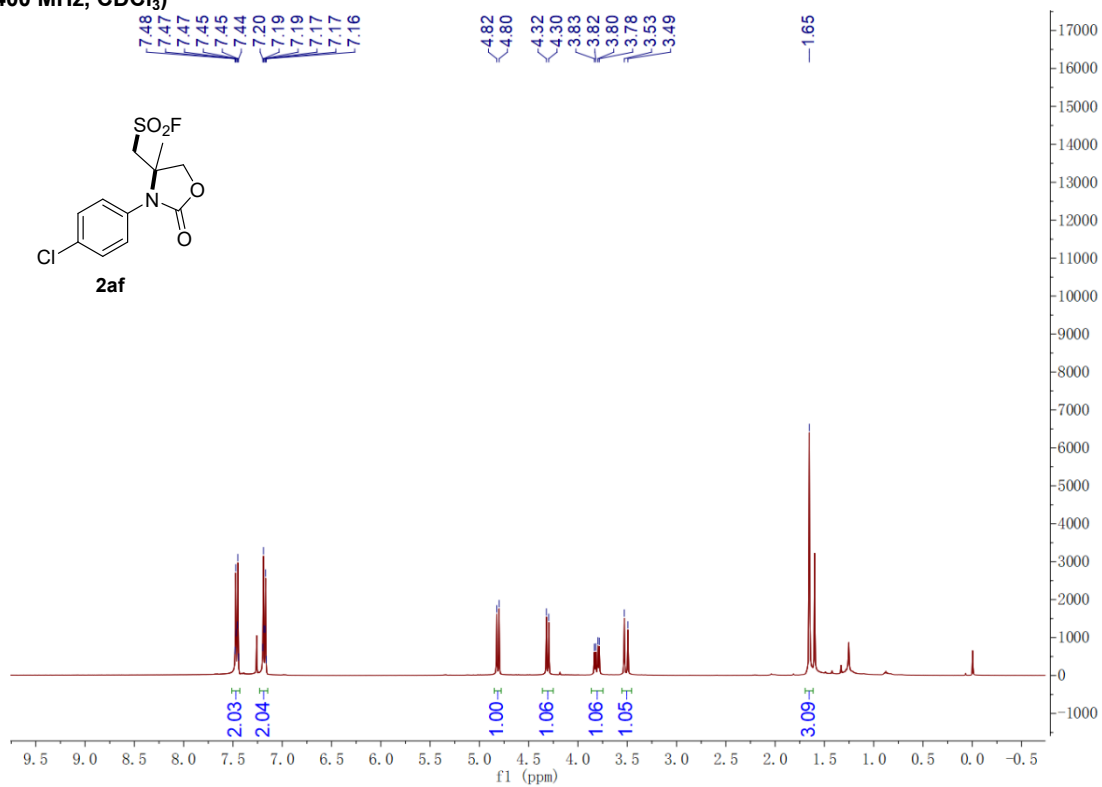



**<sup>13</sup>C-NMR (126 MHz, CDCl<sub>3</sub>)**

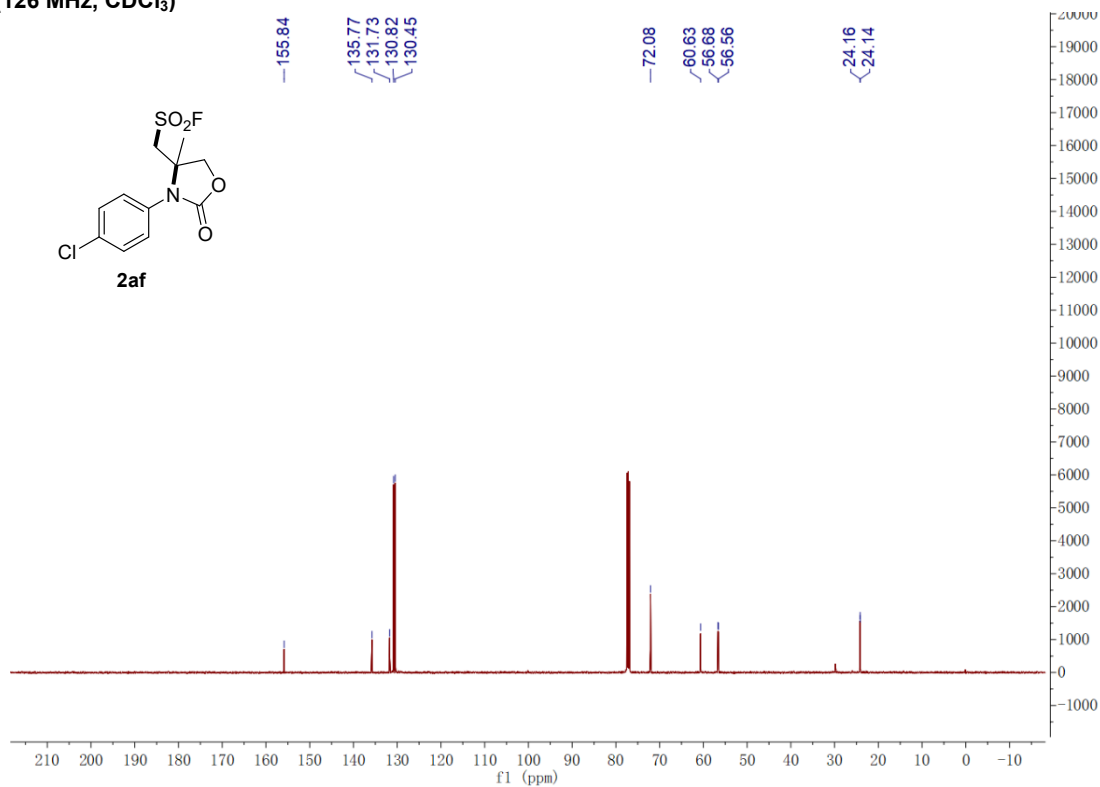

**<sup>19</sup>F NMR (376 MHz, CDCl<sub>3</sub>)**

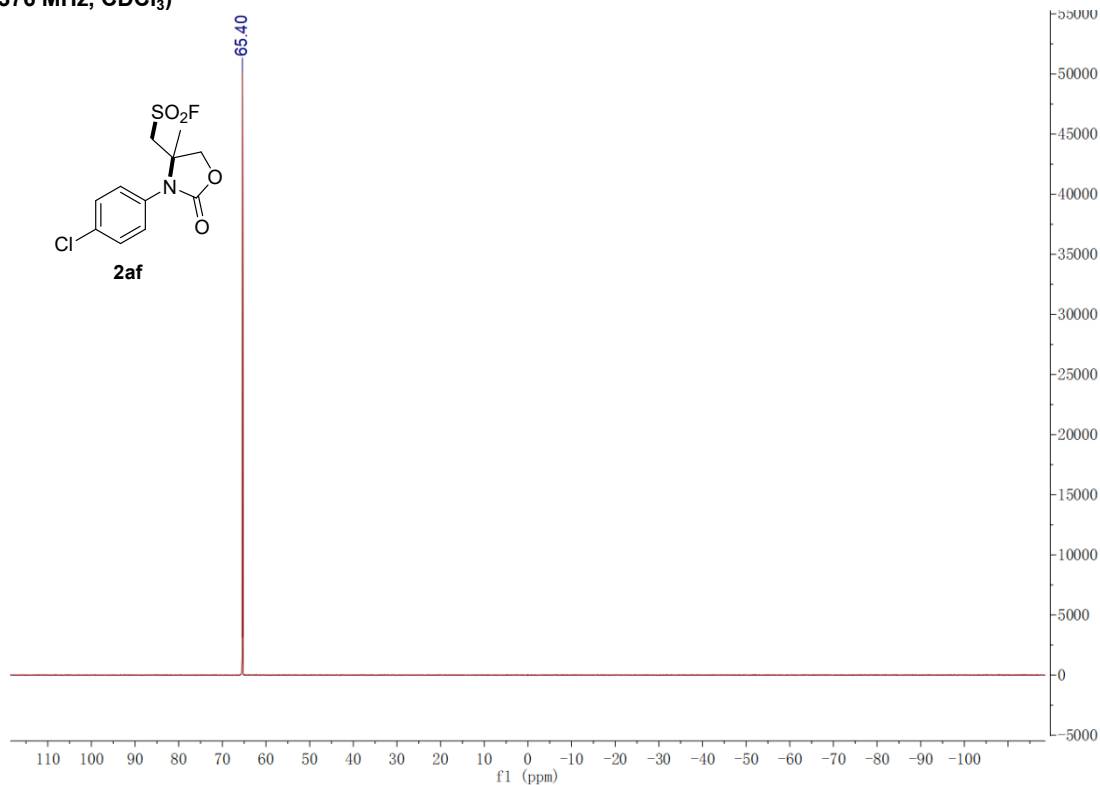

**<sup>1</sup>H-NMR (400 MHz, CDCl<sub>3</sub>)**

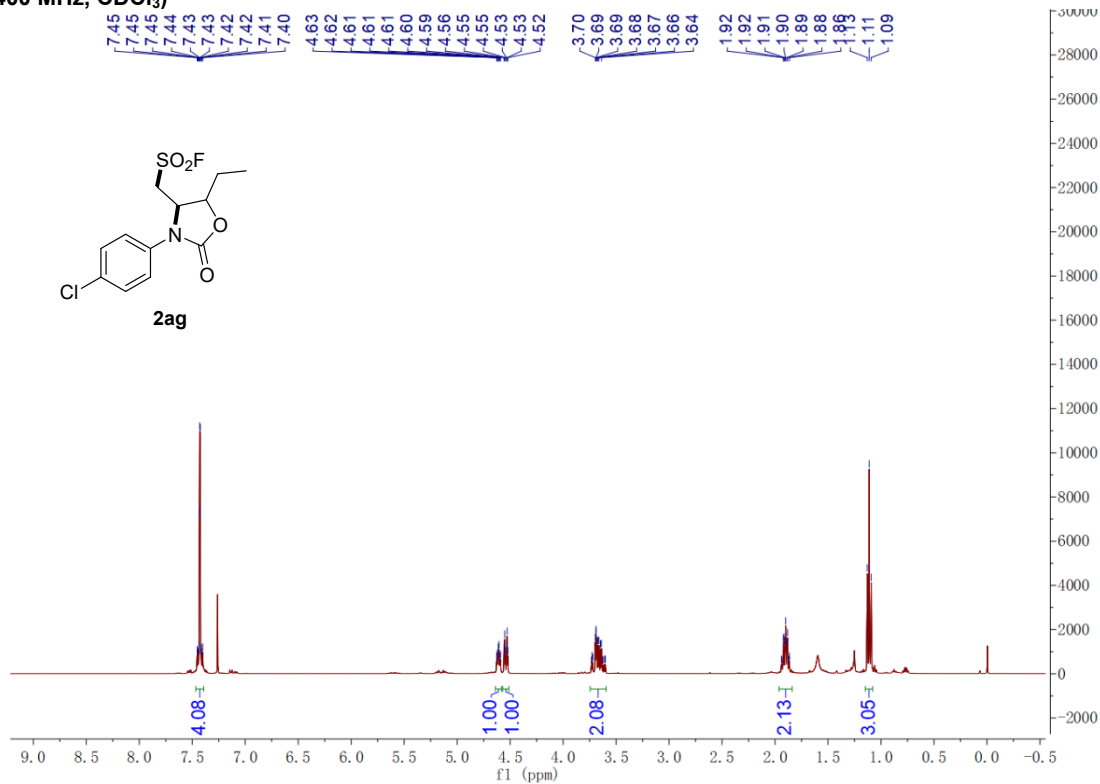

**<sup>13</sup>C-NMR (101 MHz, CDCl<sub>3</sub>)**

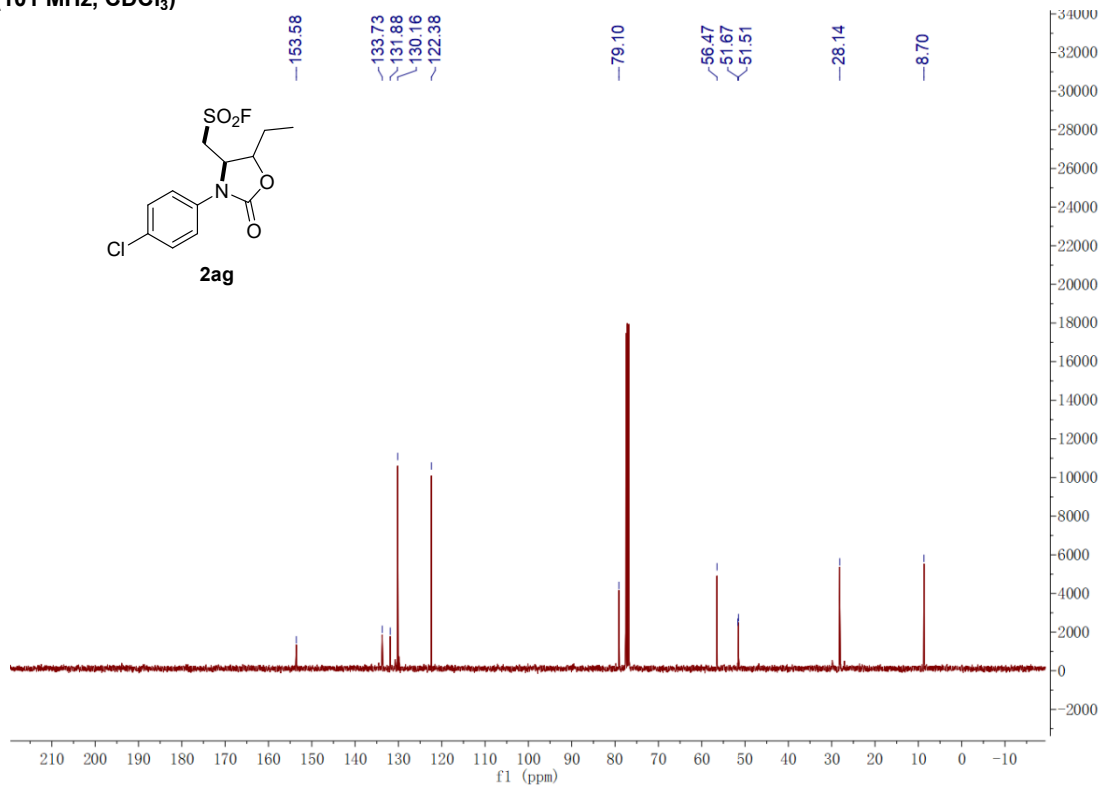

**<sup>19</sup>F NMR (376 MHz, CDCl<sub>3</sub>)**

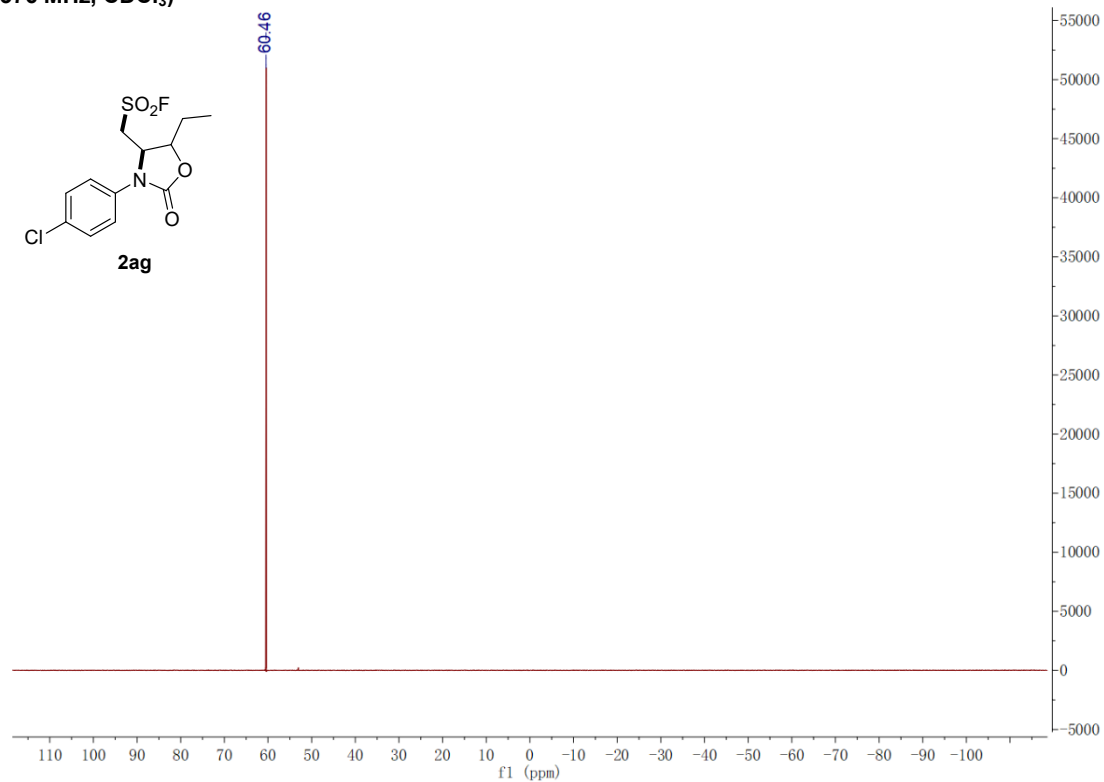

**<sup>1</sup>H-NMR (400 MHz, CDCl<sub>3</sub>)**

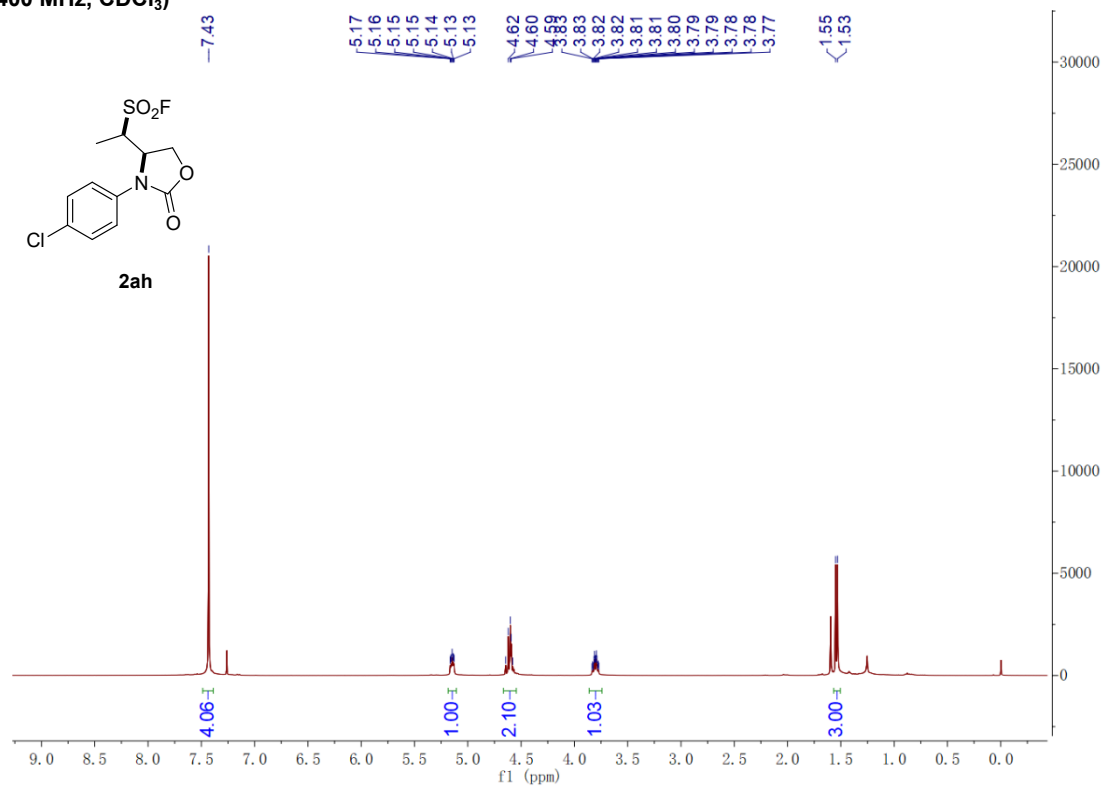

**<sup>13</sup>C-NMR (126 MHz, CDCl<sub>3</sub>)**

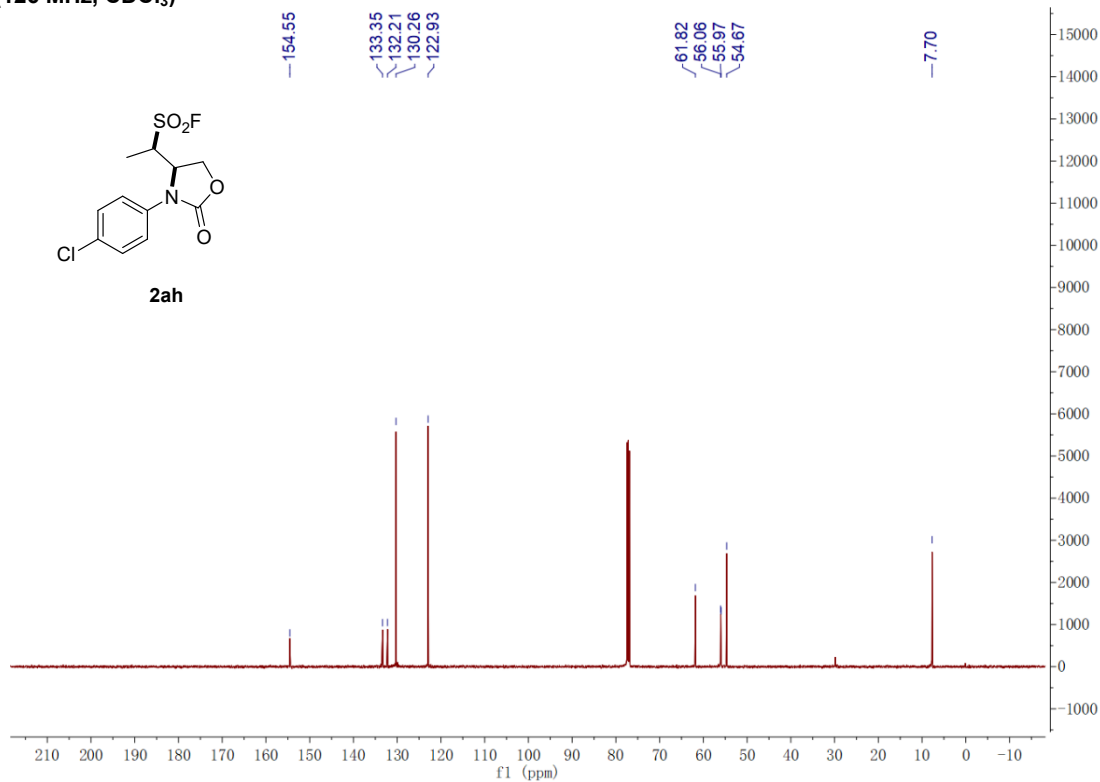

**<sup>19</sup>F NMR (376 MHz, CDCl<sub>3</sub>)**

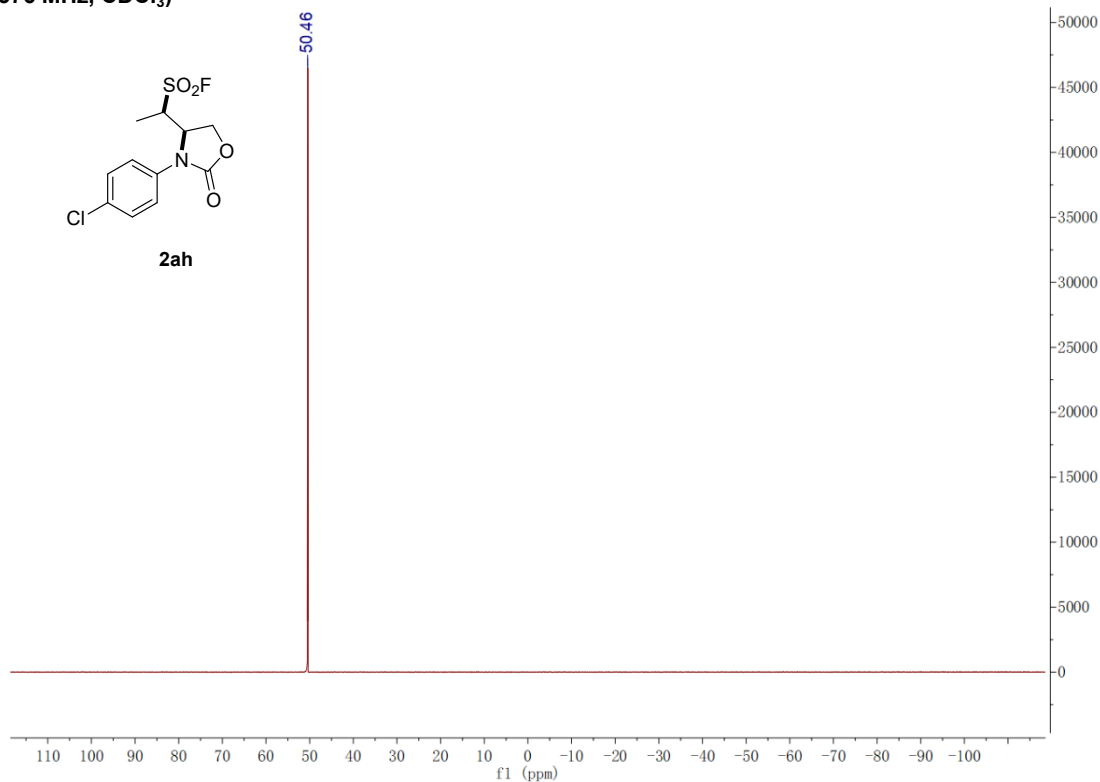

**<sup>1</sup>H-NMR (400 MHz, CDCl<sub>3</sub>)**

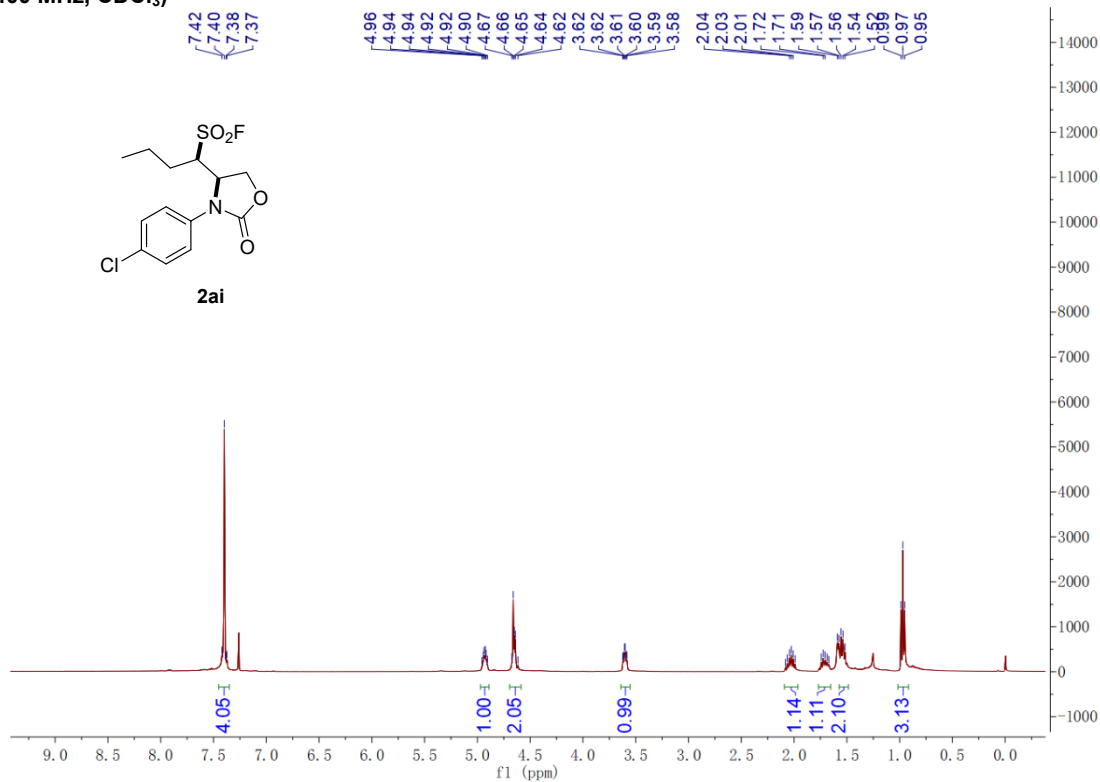

**<sup>13</sup>C-NMR (101 MHz, CDCl<sub>3</sub>)**

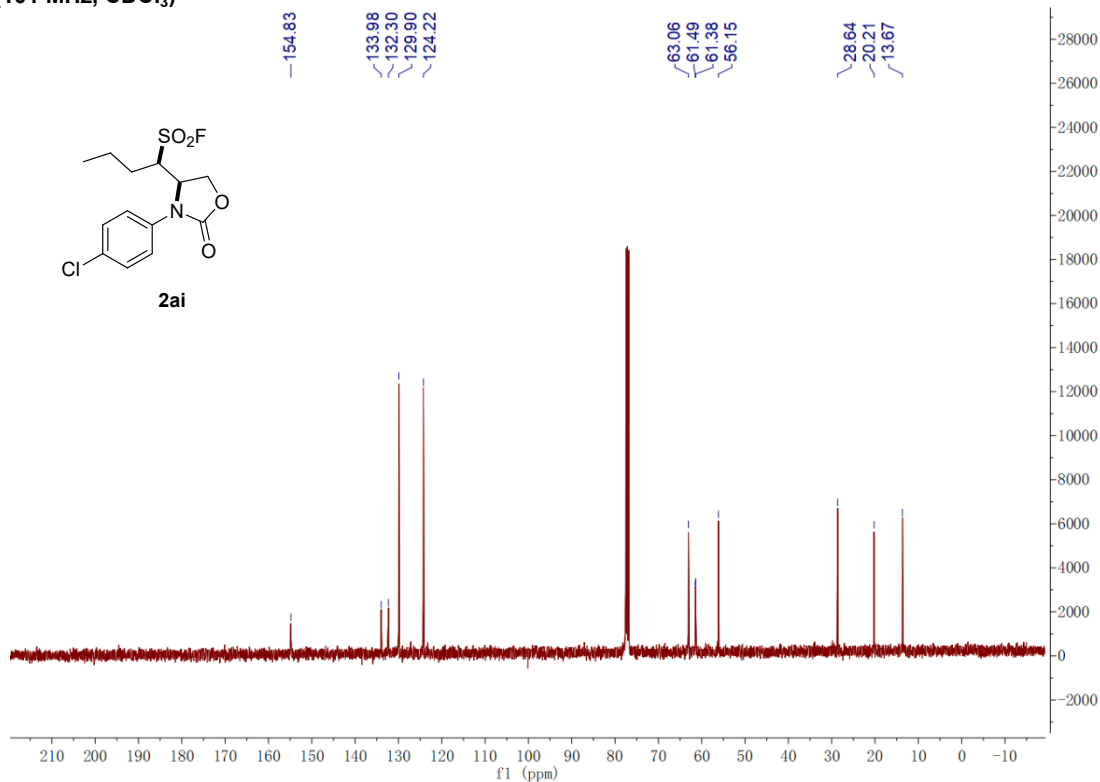

**<sup>19</sup>F NMR (376 MHz, CDCl<sub>3</sub>)**

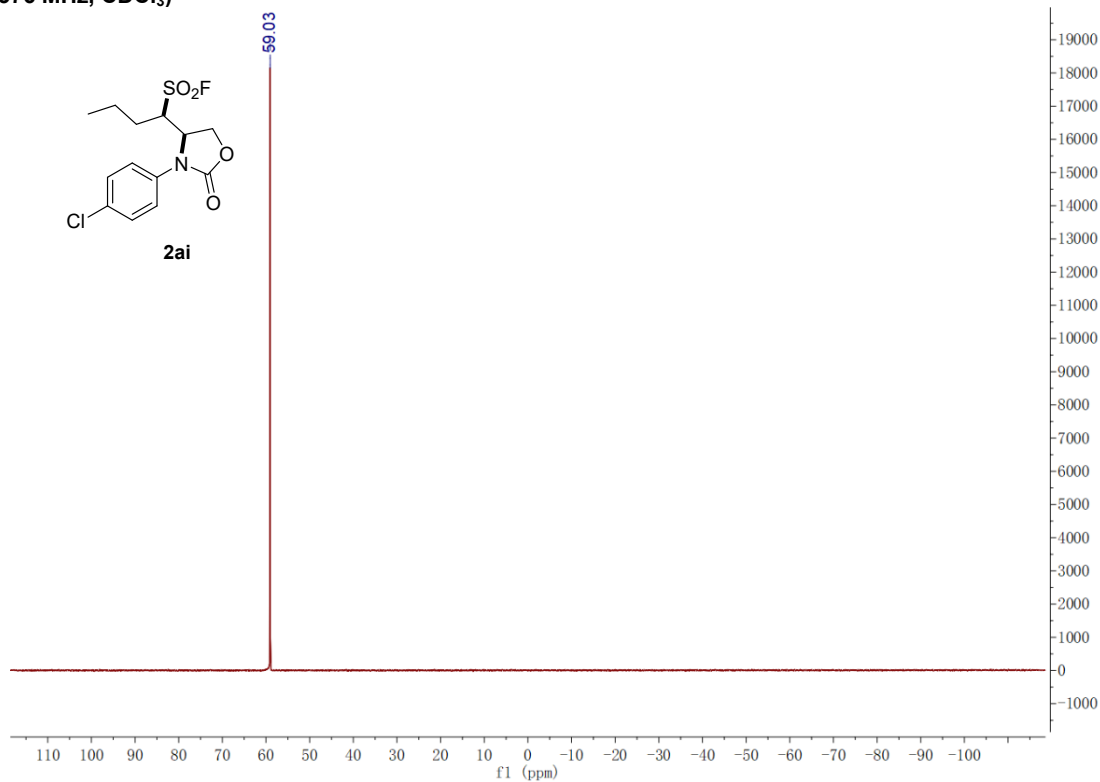

**<sup>1</sup>H-NMR (400 MHz, CDCl<sub>3</sub>)**

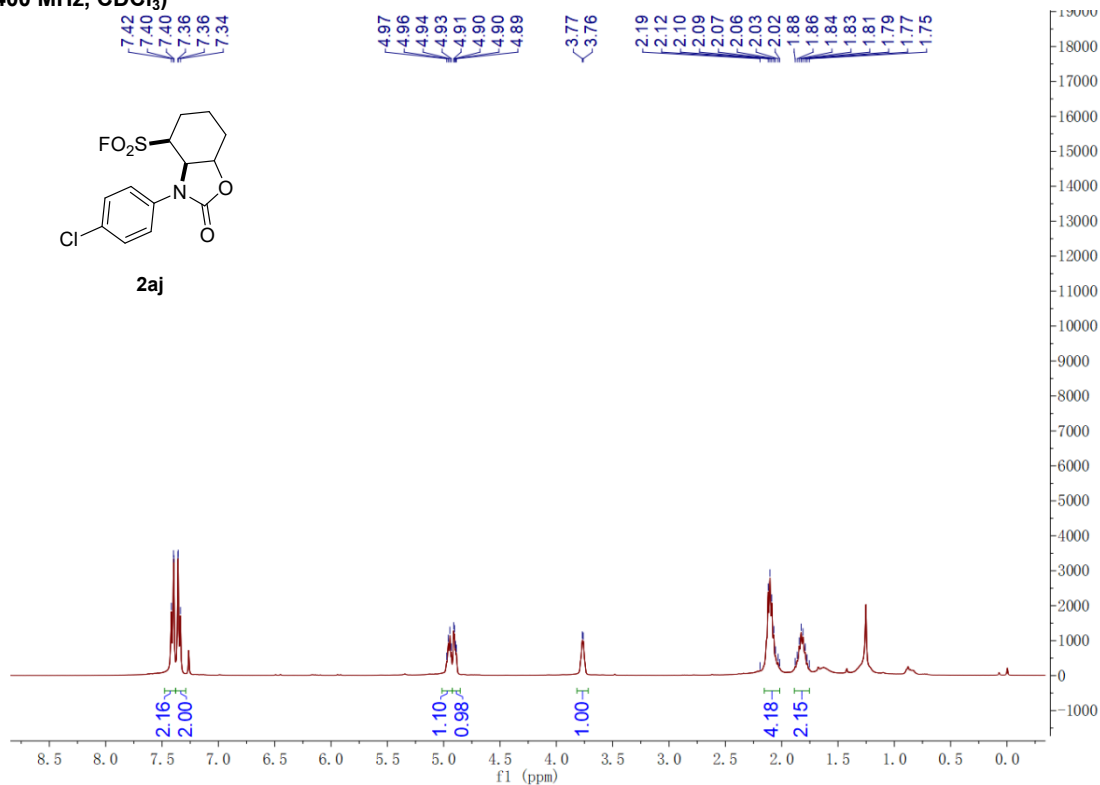

**<sup>13</sup>C-NMR (101 MHz, CDCl<sub>3</sub>)**

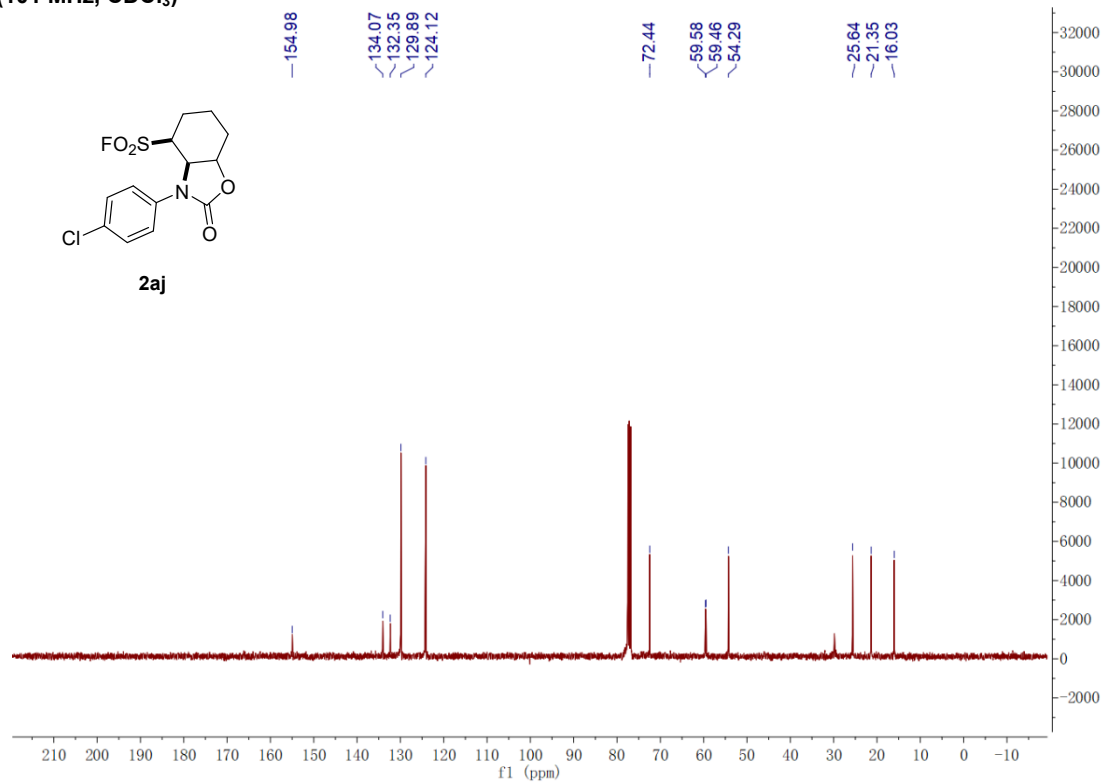

**<sup>19</sup>F NMR (376 MHz, CDCl<sub>3</sub>)**

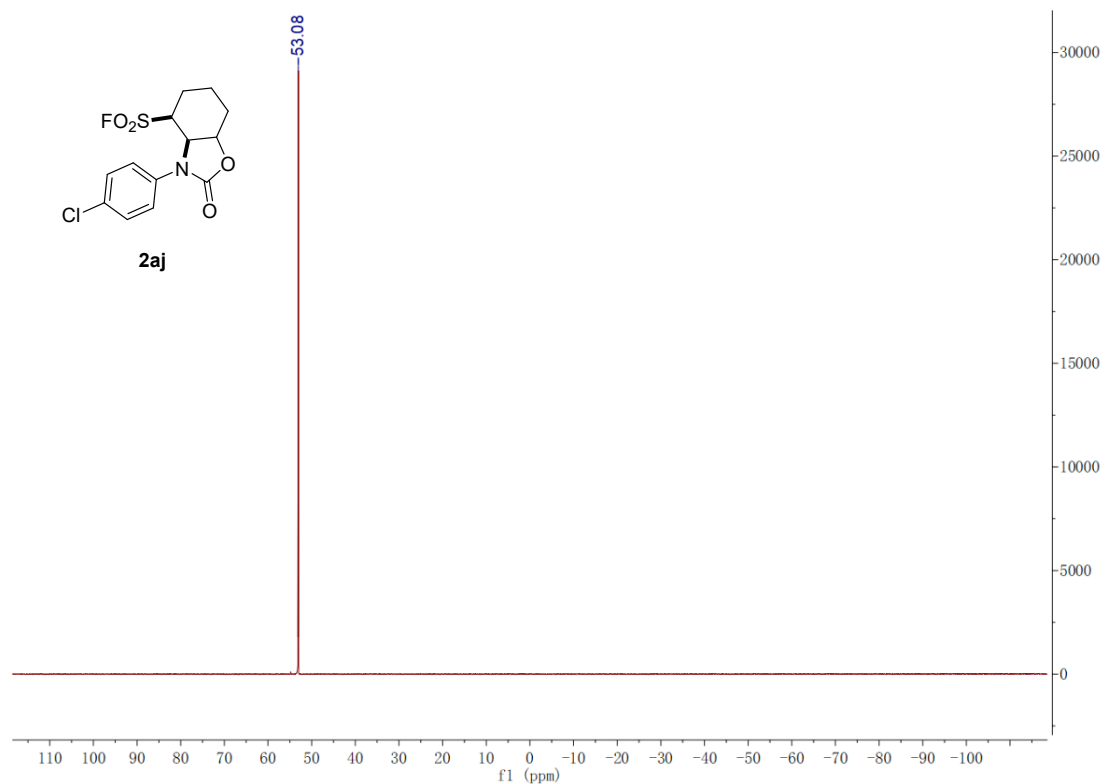

**<sup>1</sup>H-NMR (400 MHz, DMSO-*d*<sub>6</sub>)**

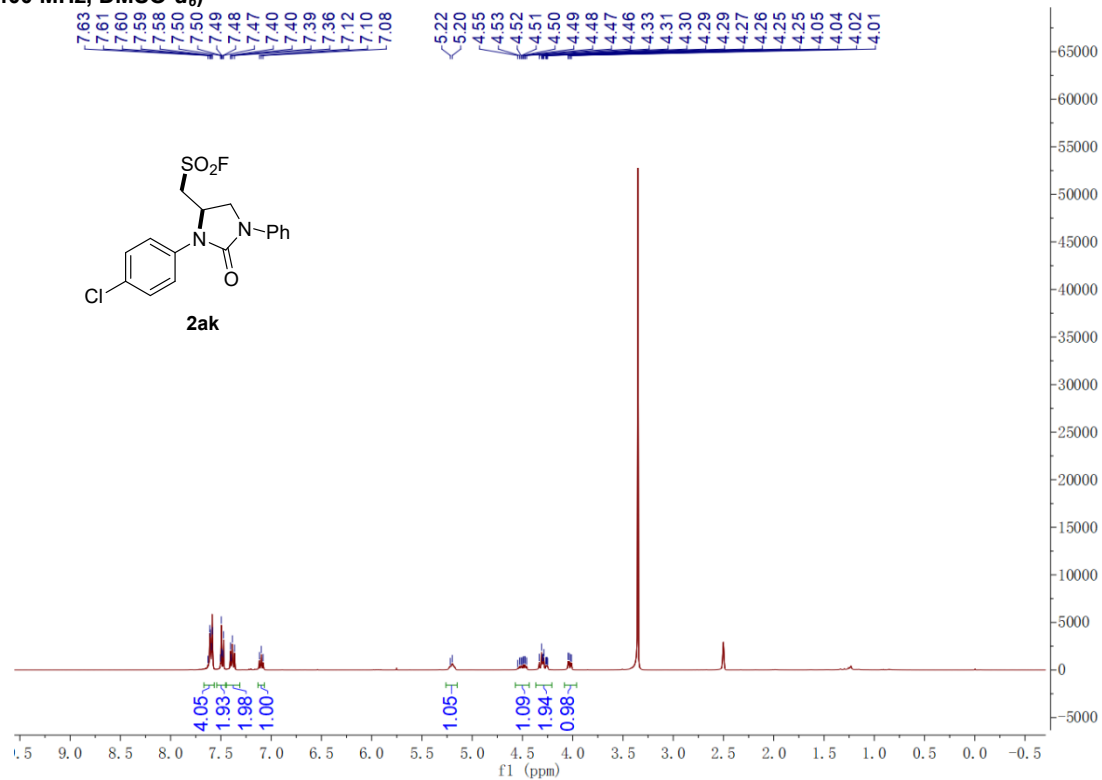

**<sup>13</sup>C-NMR (101 MHz, DMSO-*d*<sub>6</sub>)**

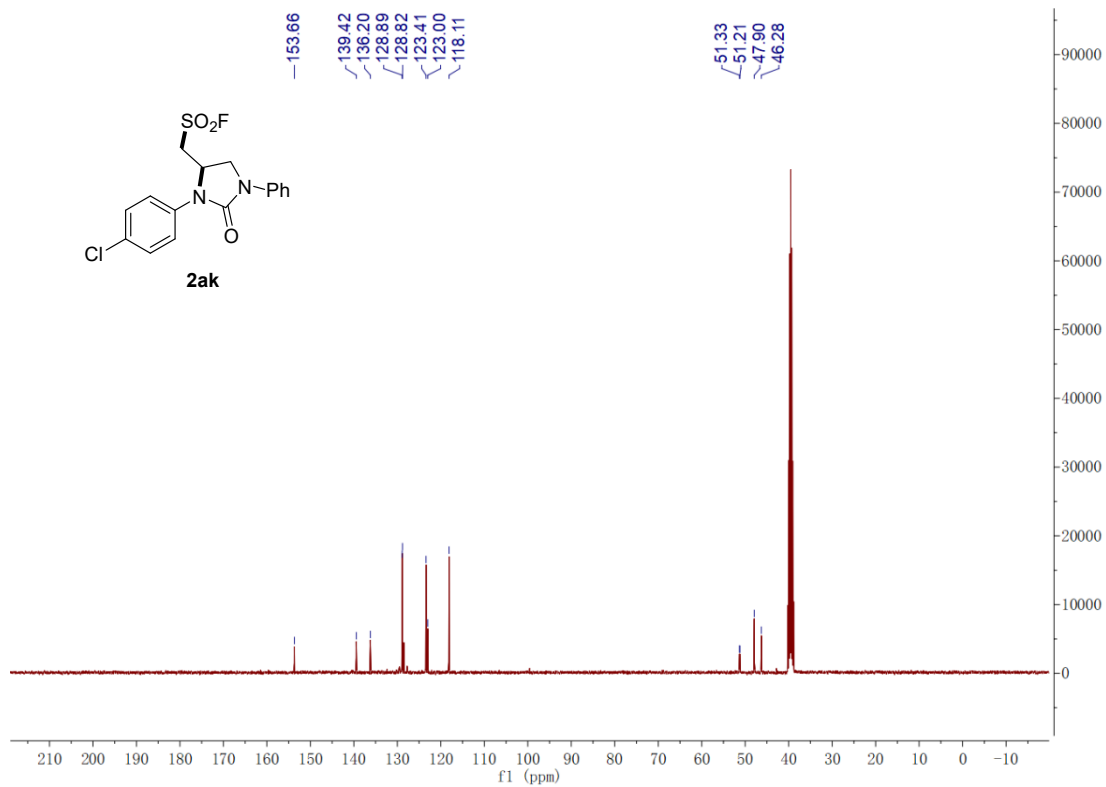



**<sup>19</sup>F NMR (376 MHz, DMSO-*d*<sub>6</sub>)**

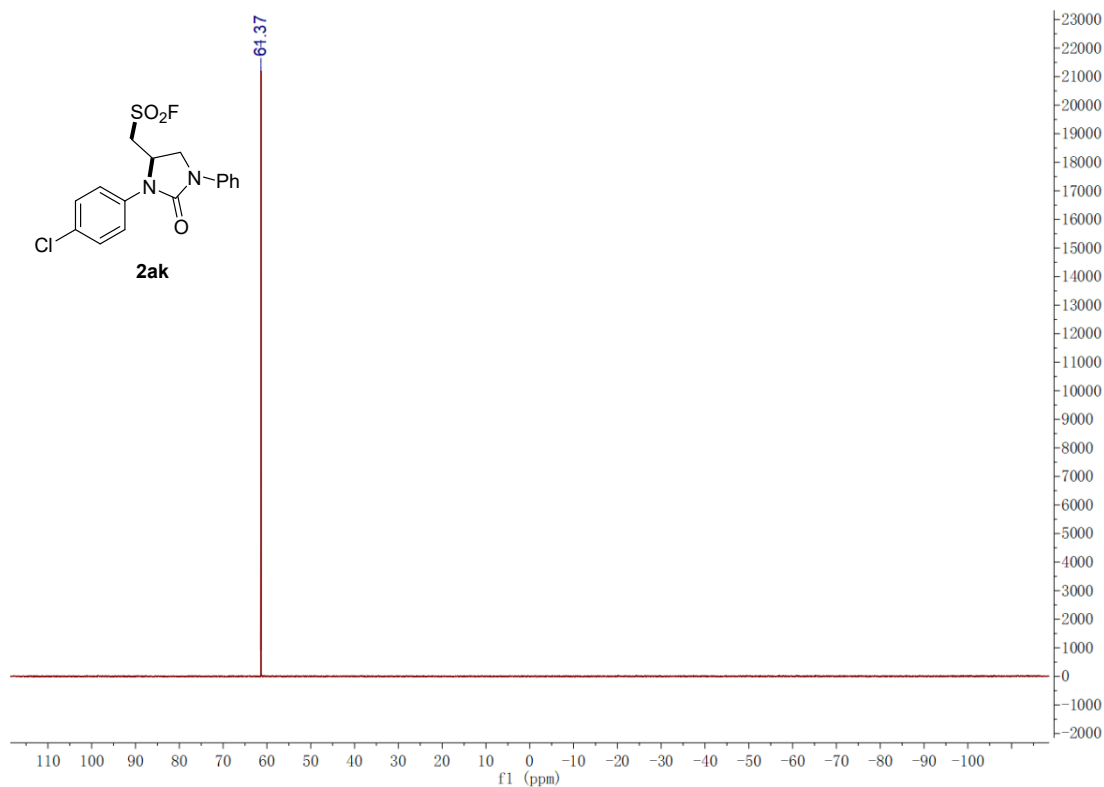

**<sup>1</sup>H-NMR (500 MHz, DMSO-*d*<sub>6</sub>)**

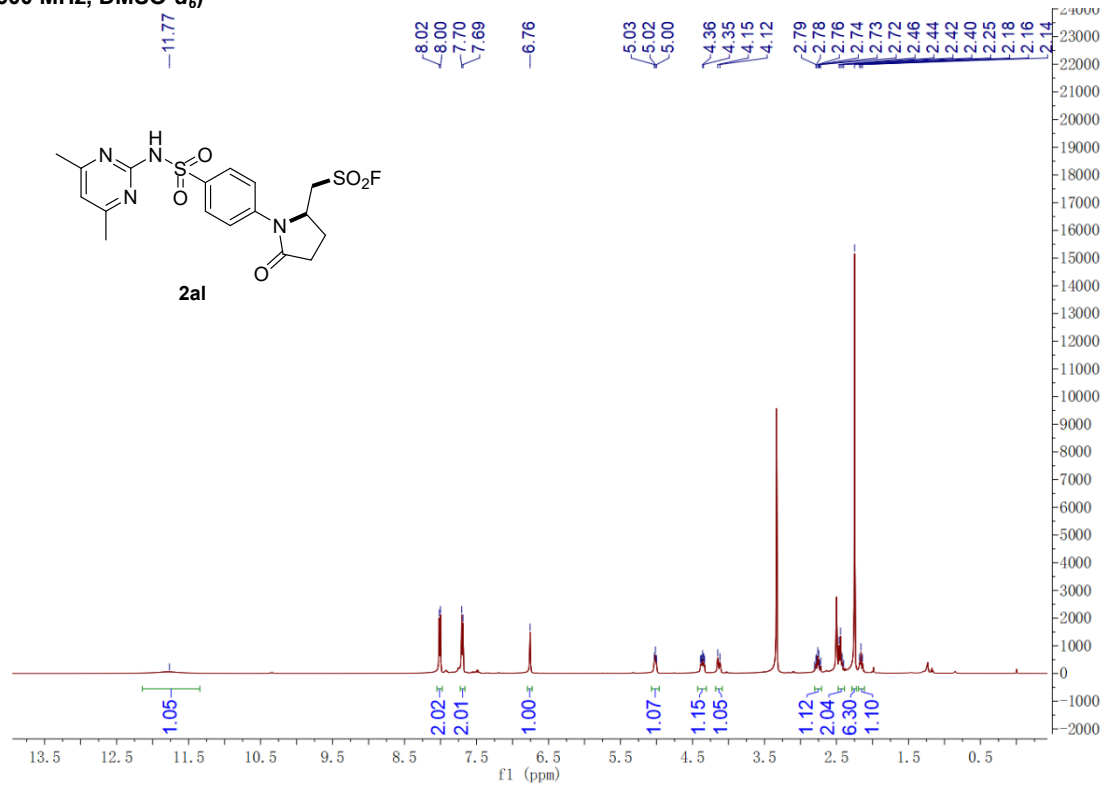

**<sup>13</sup>C-NMR (126 MHz, DMSO-*d*<sub>6</sub>)**

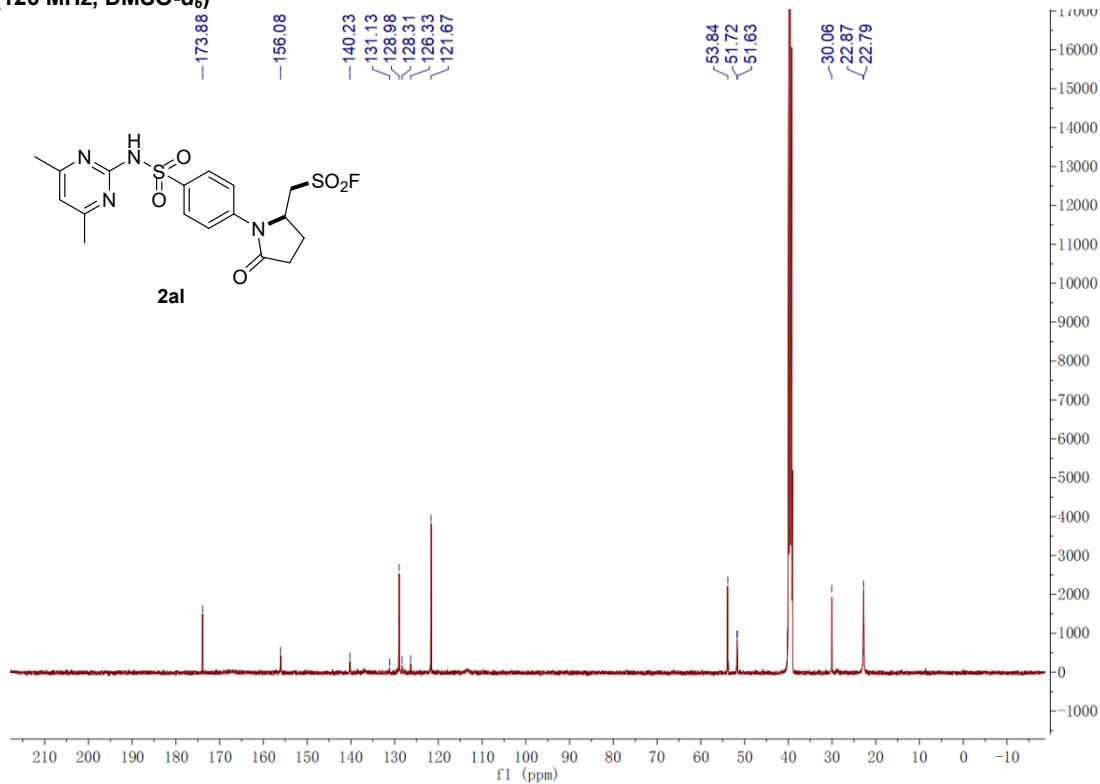

**<sup>19</sup>F NMR (376 MHz, DMSO-*d*<sub>6</sub>)**

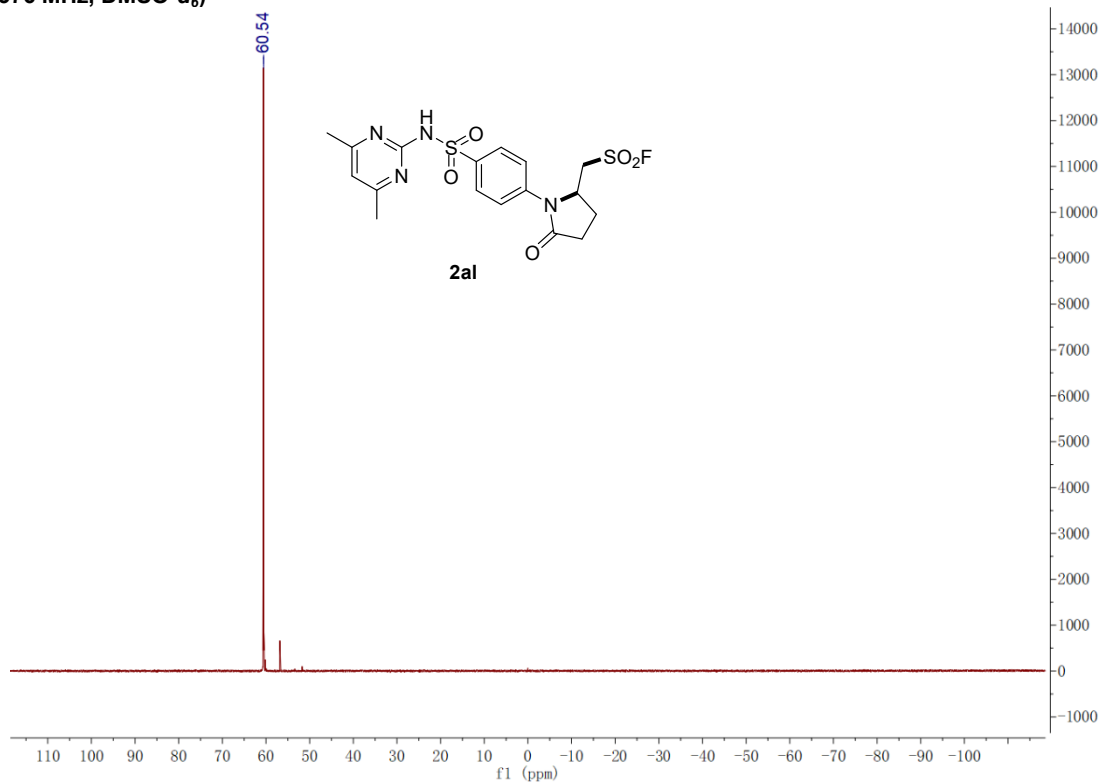

**<sup>1</sup>H-NMR (400 MHz, DMSO-*d*<sub>6</sub>)**

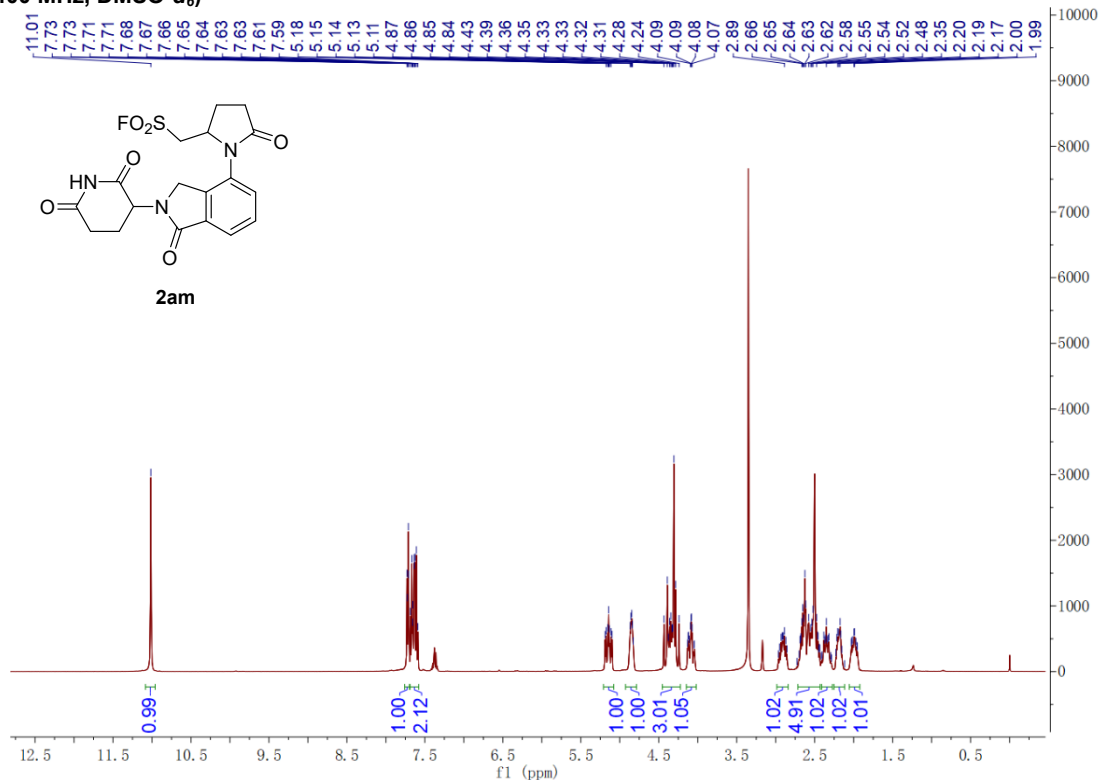

**<sup>13</sup>C-NMR (101 MHz, DMSO-*d*<sub>6</sub>)**

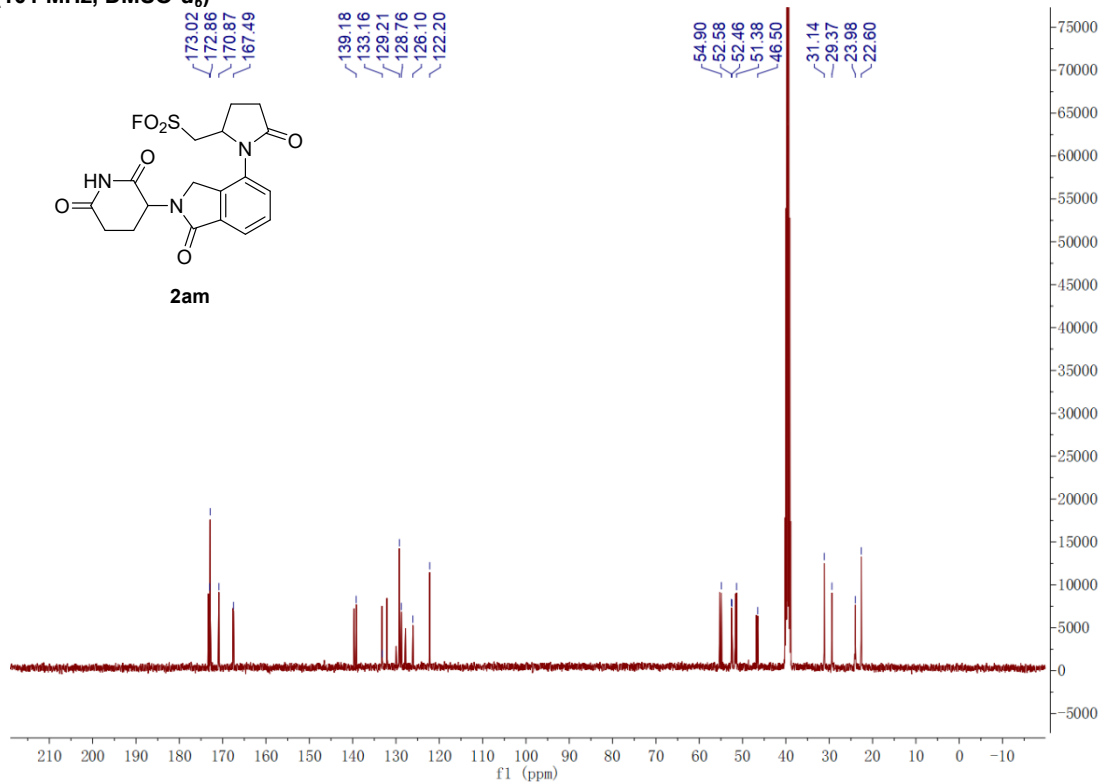

<sup>19</sup>F NMR (376 MHz, DMSO-*d*<sub>6</sub>)

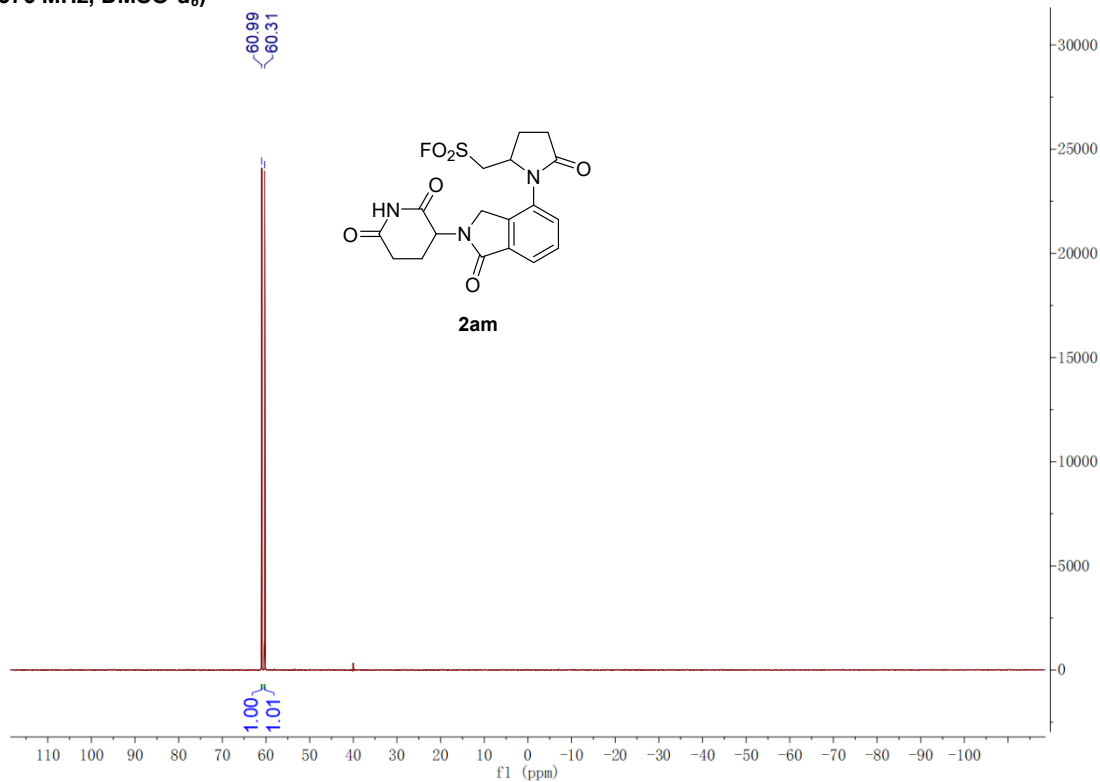

<sup>1</sup>H-NMR (400 MHz, CDCl<sub>3</sub>)

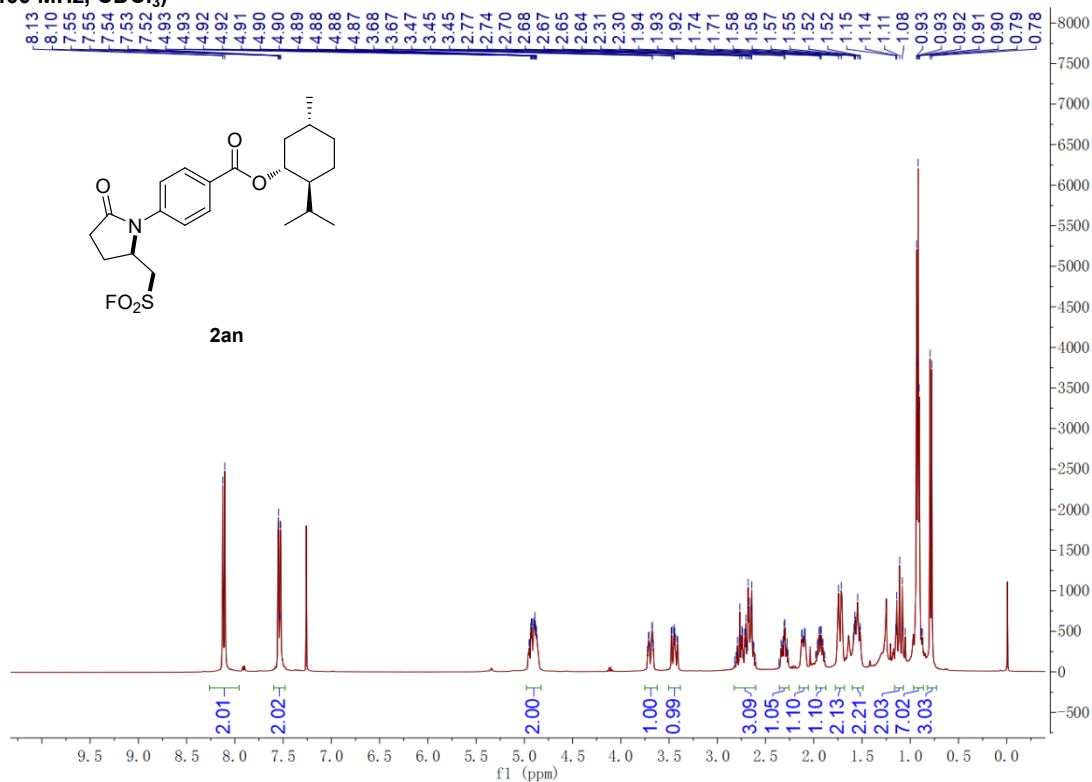

**$^{13}\text{C}$ -NMR (101 MHz,  $\text{CDCl}_3$ )**

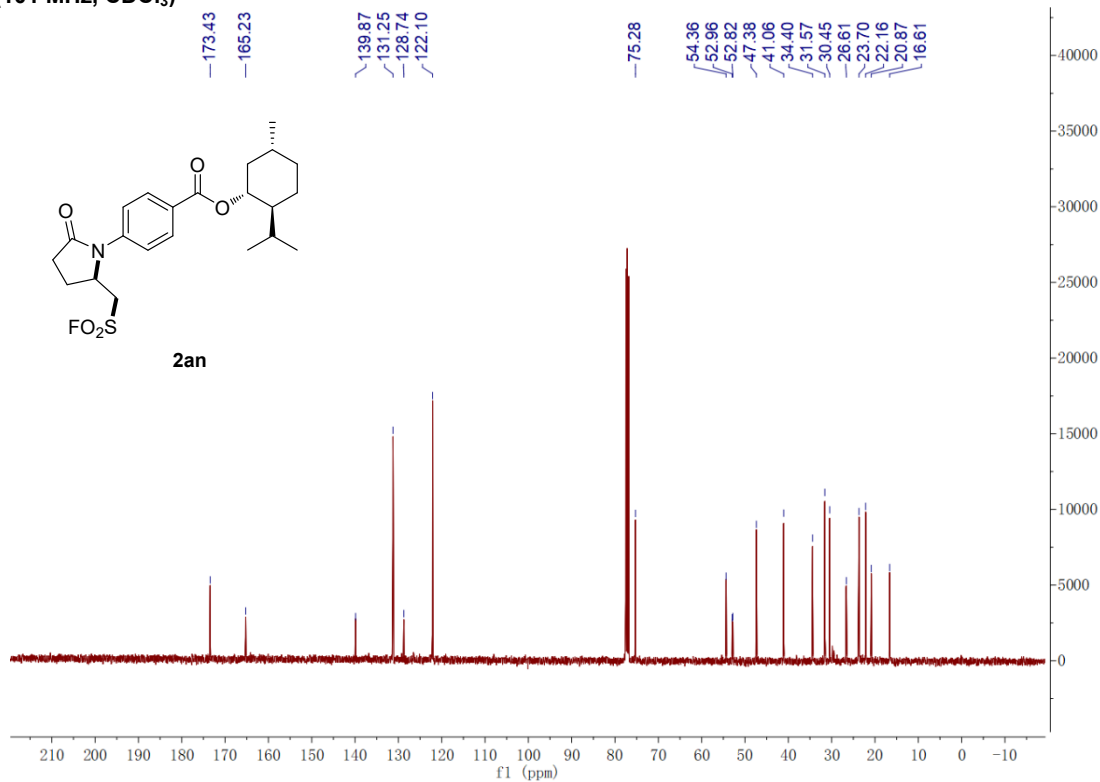

**$^{19}\text{F}$  NMR (376 MHz,  $\text{CDCl}_3$ )**

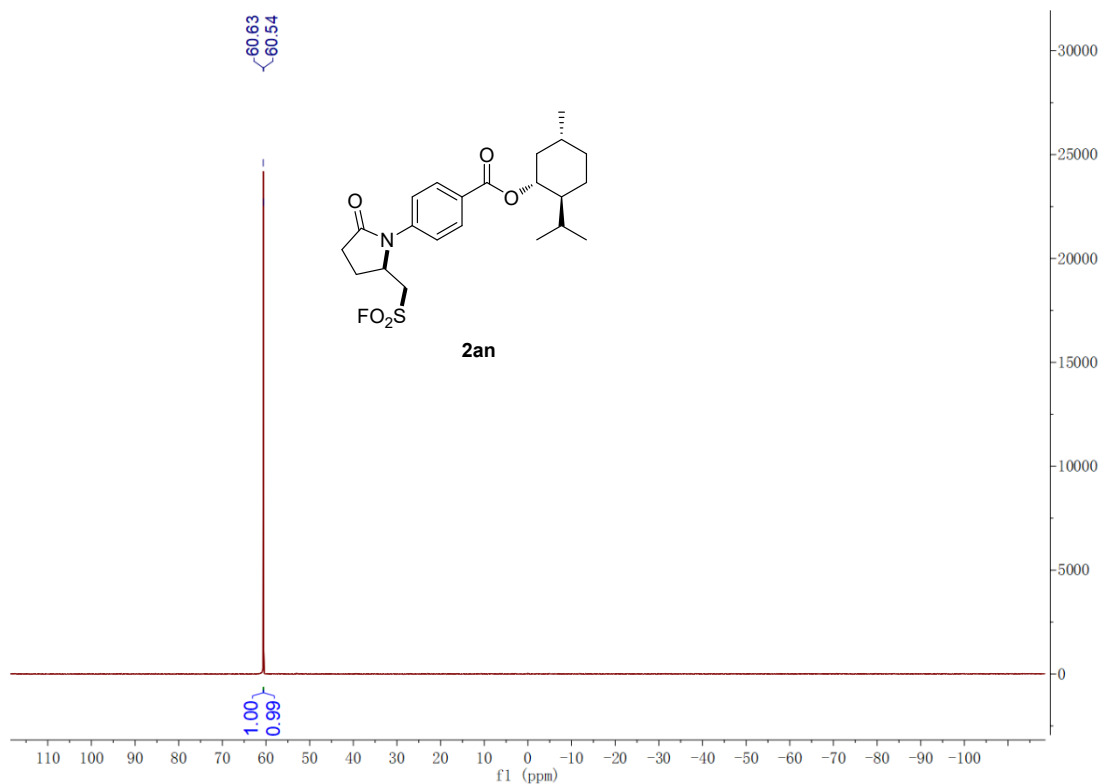

**<sup>1</sup>H-NMR (400 MHz, CDCl<sub>3</sub>)**

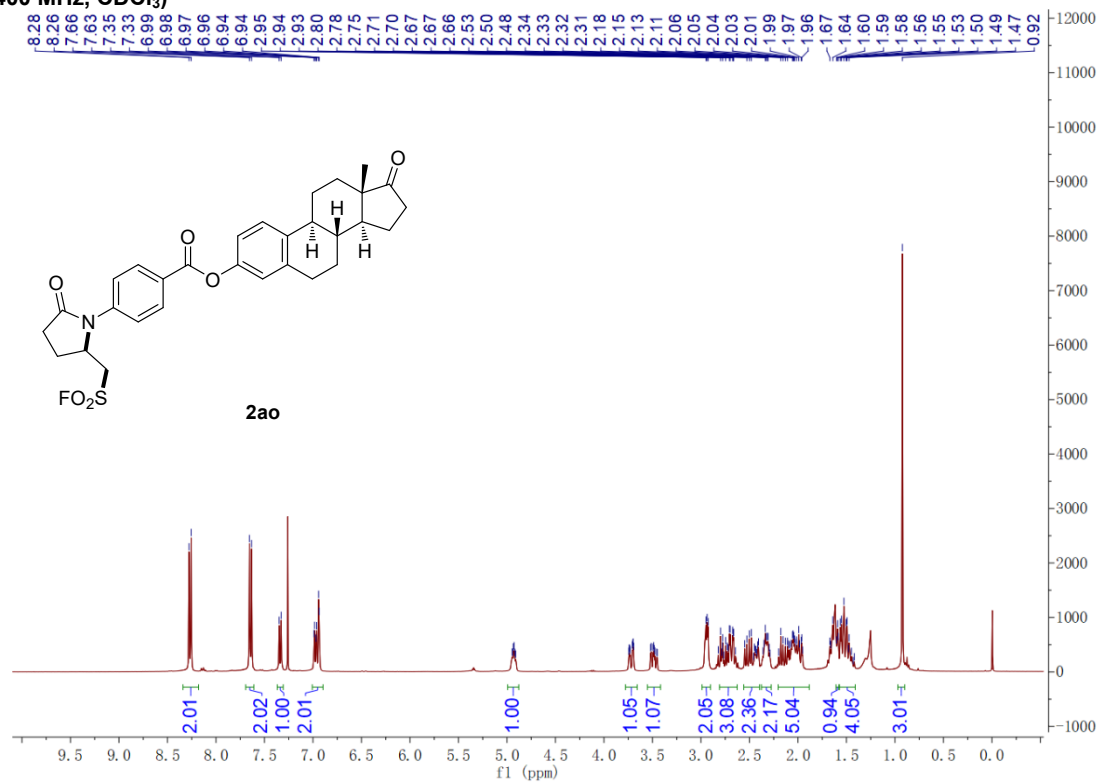

**<sup>13</sup>C-NMR (126 MHz, CDCl<sub>3</sub>)**

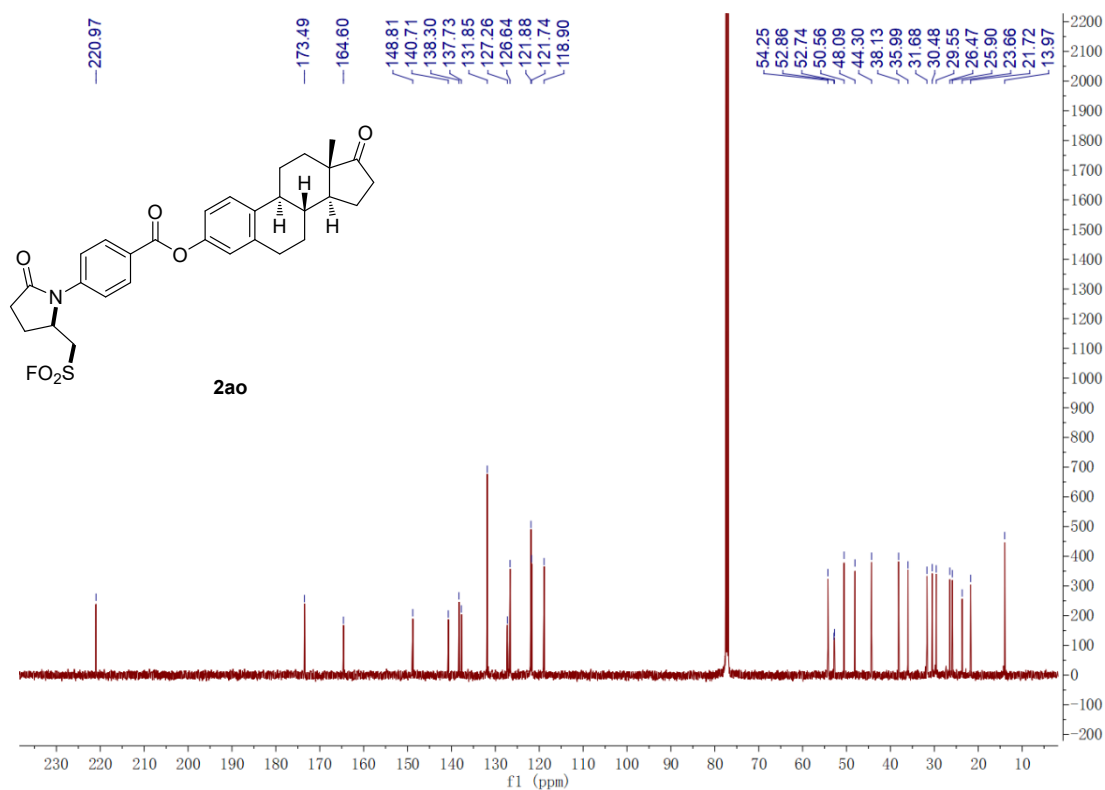

<sup>19</sup>F NMR (376 MHz, CDCl<sub>3</sub>)

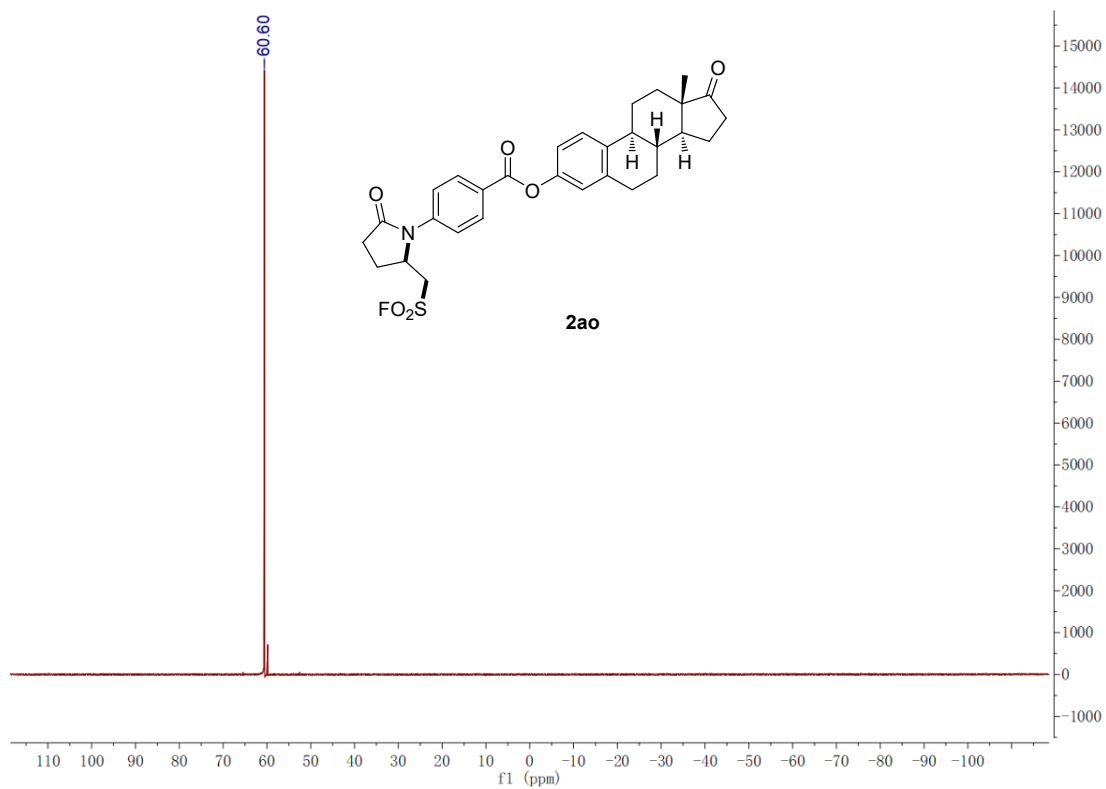

**<sup>1</sup>H-NMR (400 MHz, CDCl<sub>3</sub>)**

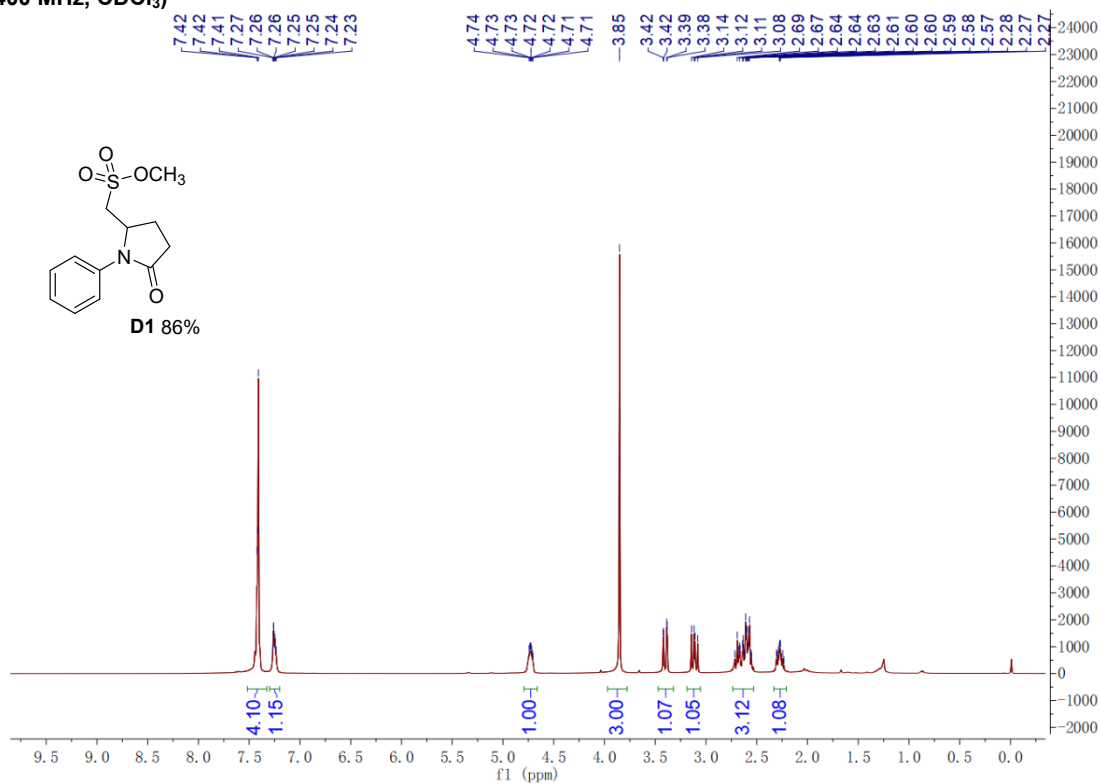

**<sup>13</sup>C-NMR (101 MHz, CDCl<sub>3</sub>)**

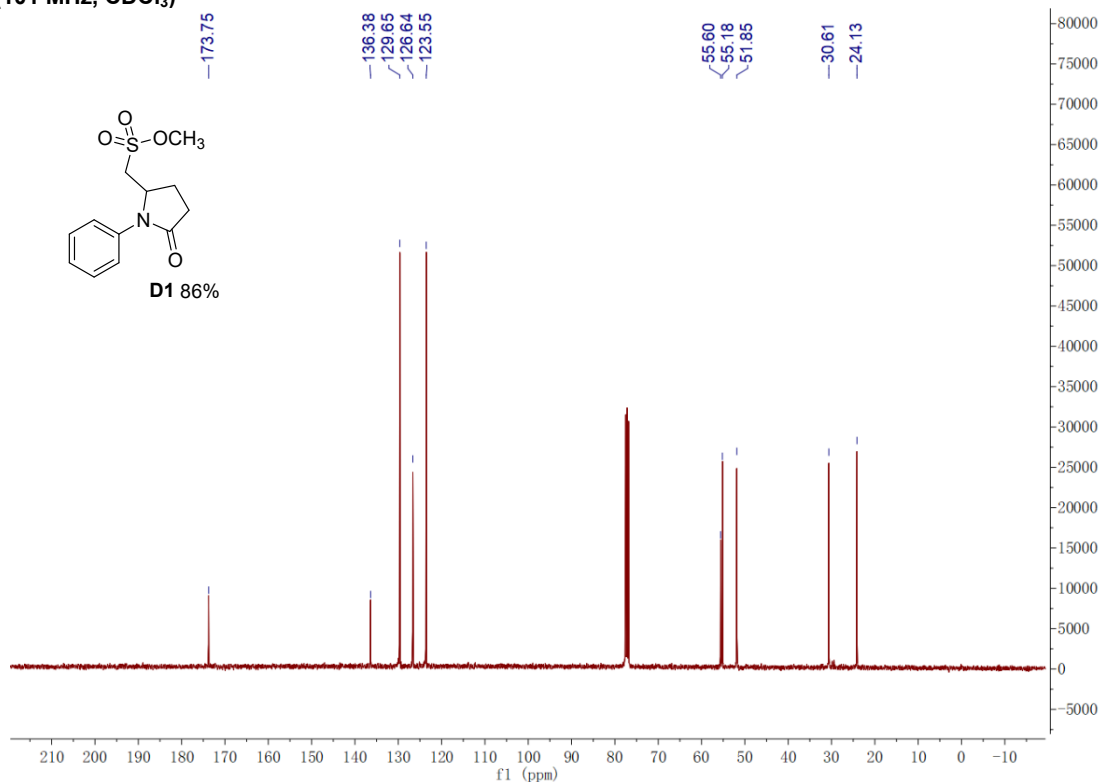



**<sup>1</sup>H-NMR (400 MHz, CDCl<sub>3</sub>)**

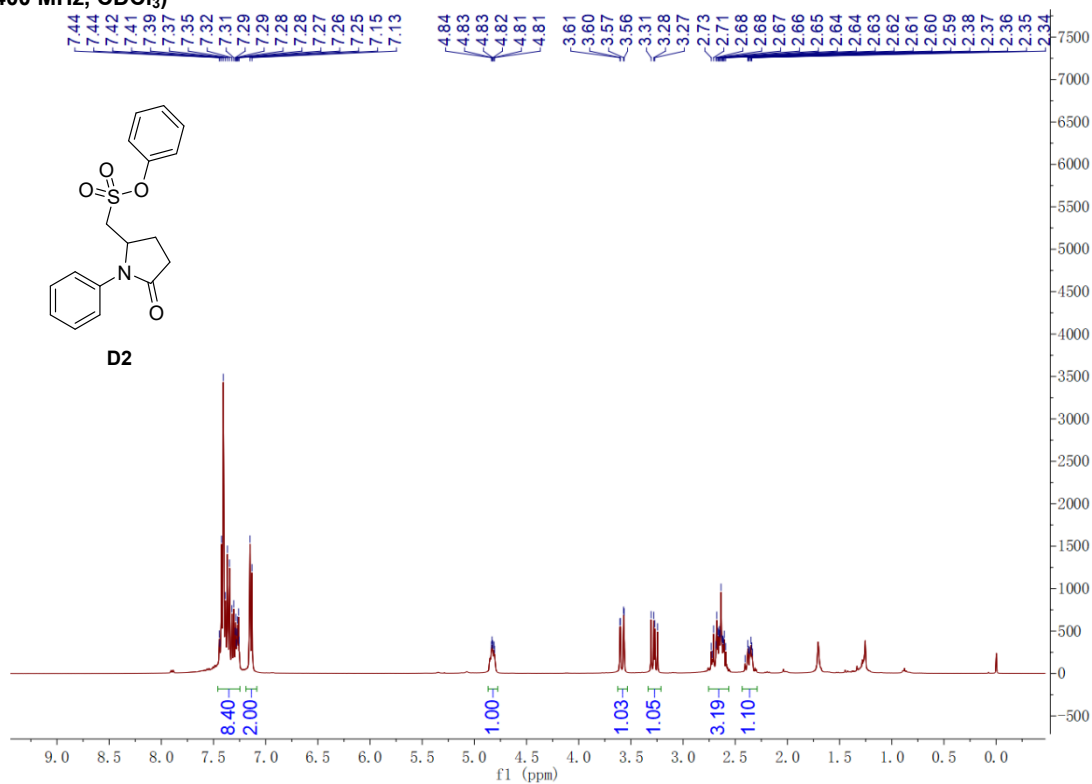

**<sup>13</sup>C-NMR (101 MHz, CDCl<sub>3</sub>)**

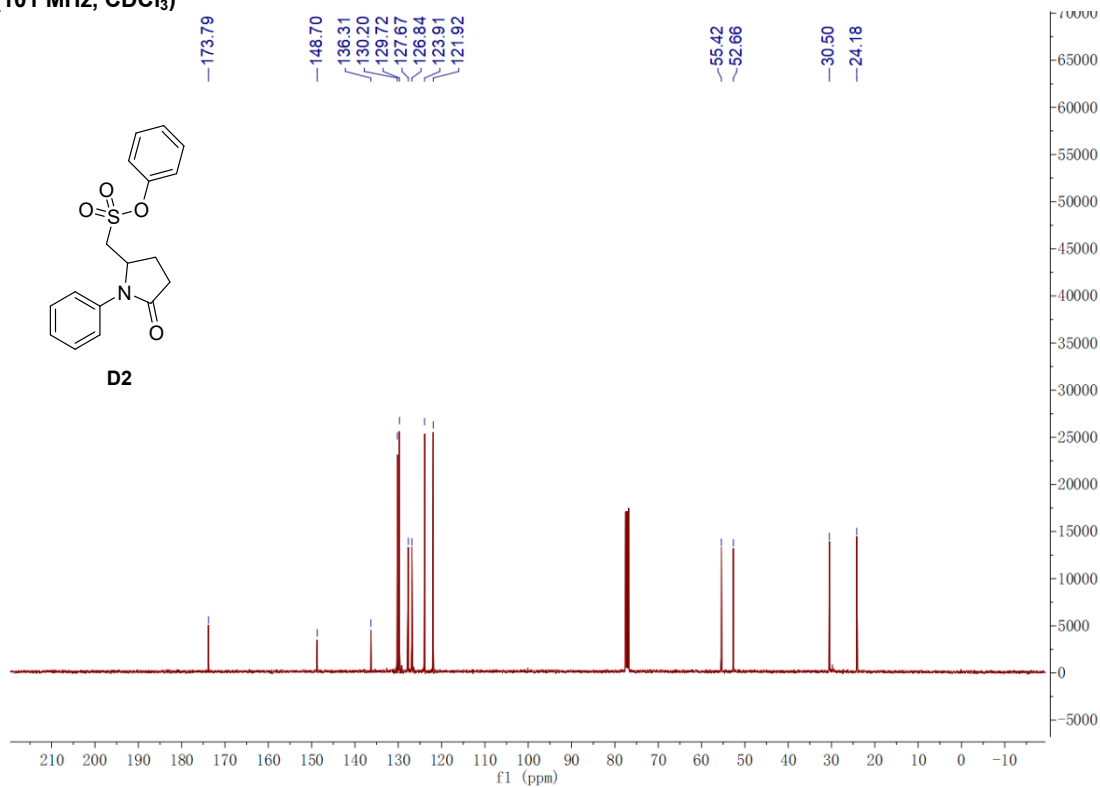

**<sup>1</sup>H-NMR (400 MHz, CDCl<sub>3</sub>)**

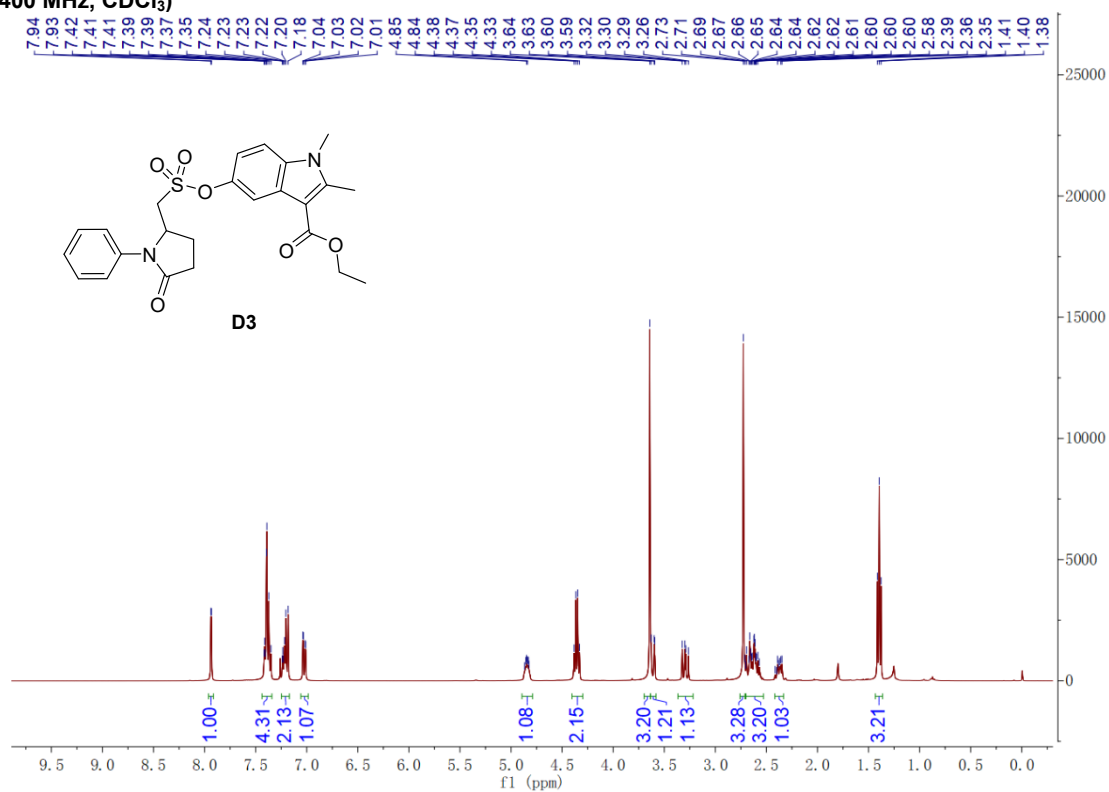

**<sup>13</sup>C-NMR (101 MHz, CDCl<sub>3</sub>)**

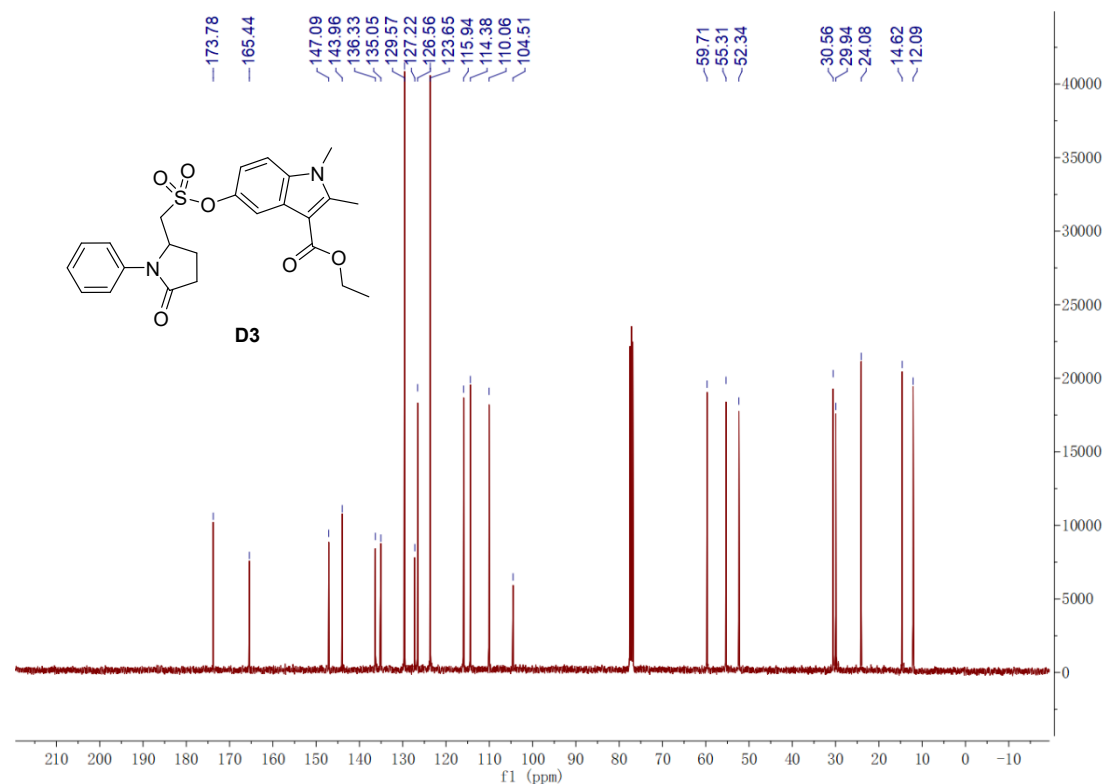

**<sup>1</sup>H-NMR (400 MHz, CDCl<sub>3</sub>)**

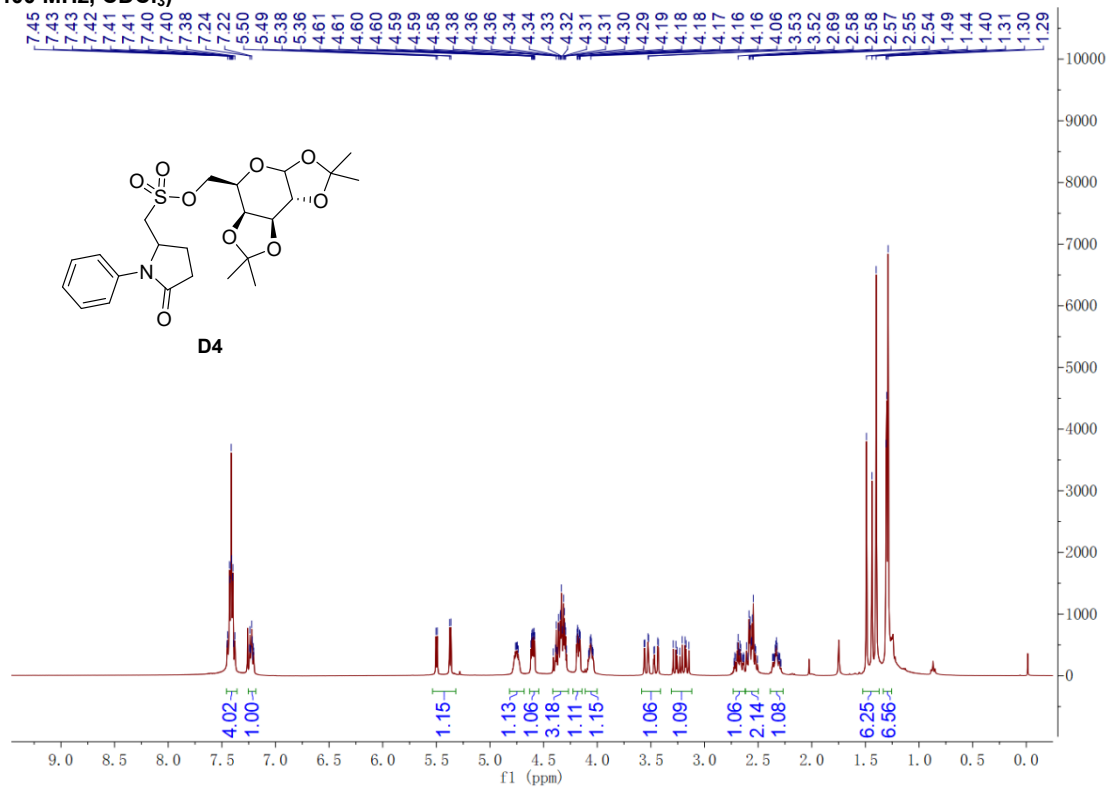

**<sup>13</sup>C-NMR (126 MHz, CDCl<sub>3</sub>)**

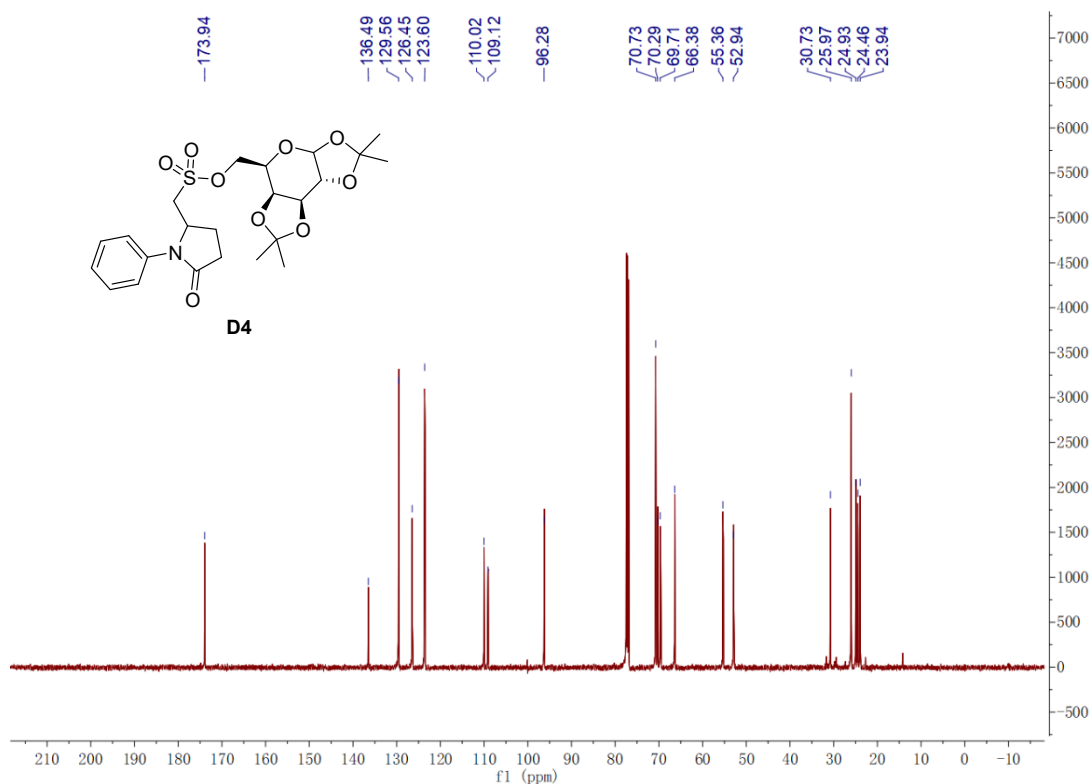

**<sup>1</sup>H-NMR (400 MHz, DMSO-*d*<sub>6</sub>)**

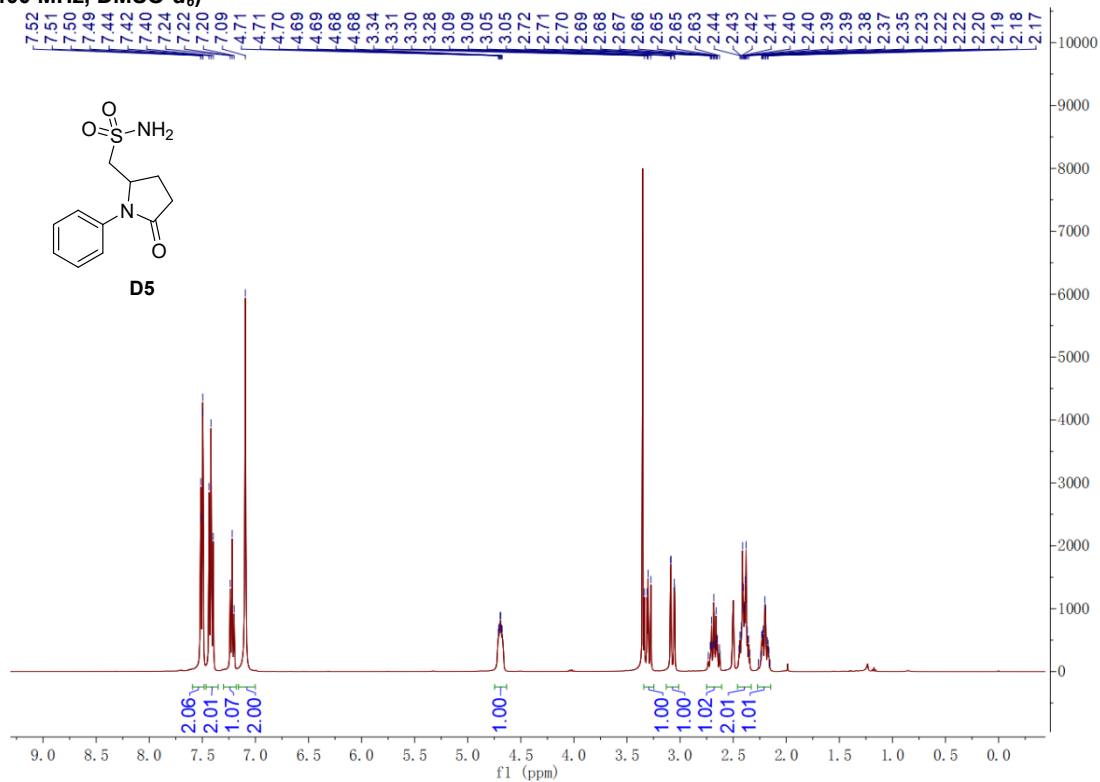

**<sup>13</sup>C-NMR (101 MHz, DMSO-*d*<sub>6</sub>)**

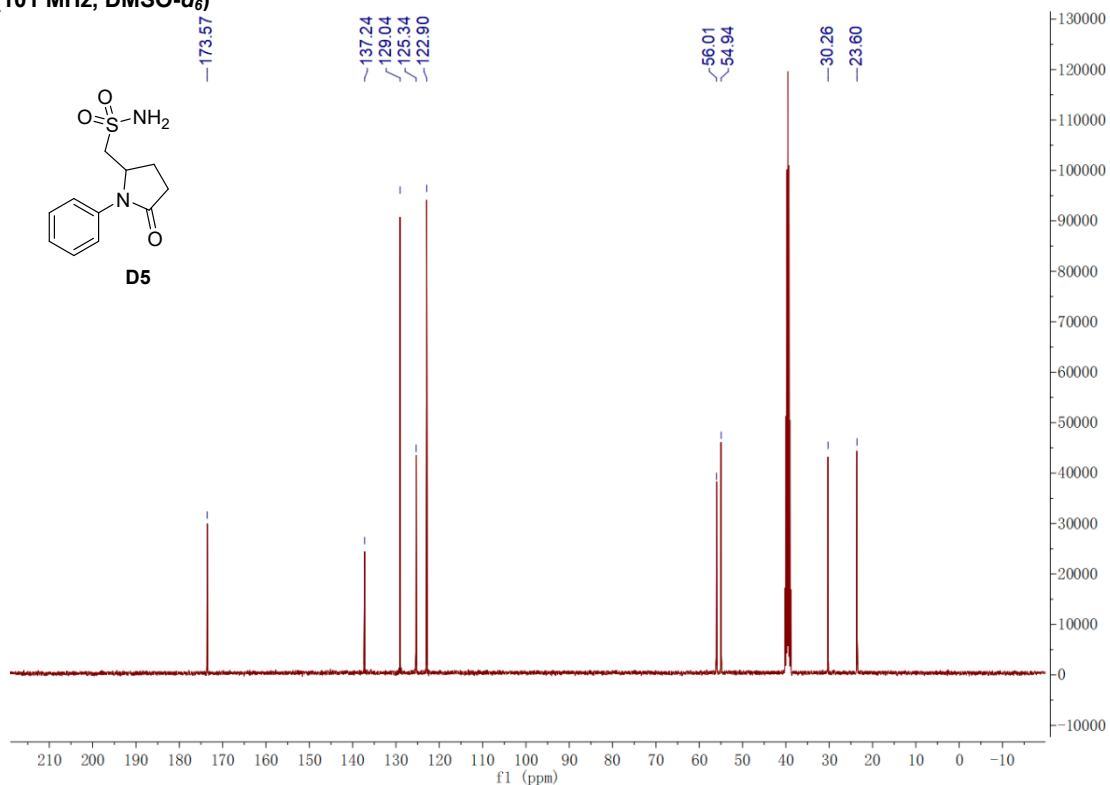

**<sup>1</sup>H-NMR (400 MHz, CDCl<sub>3</sub>)**

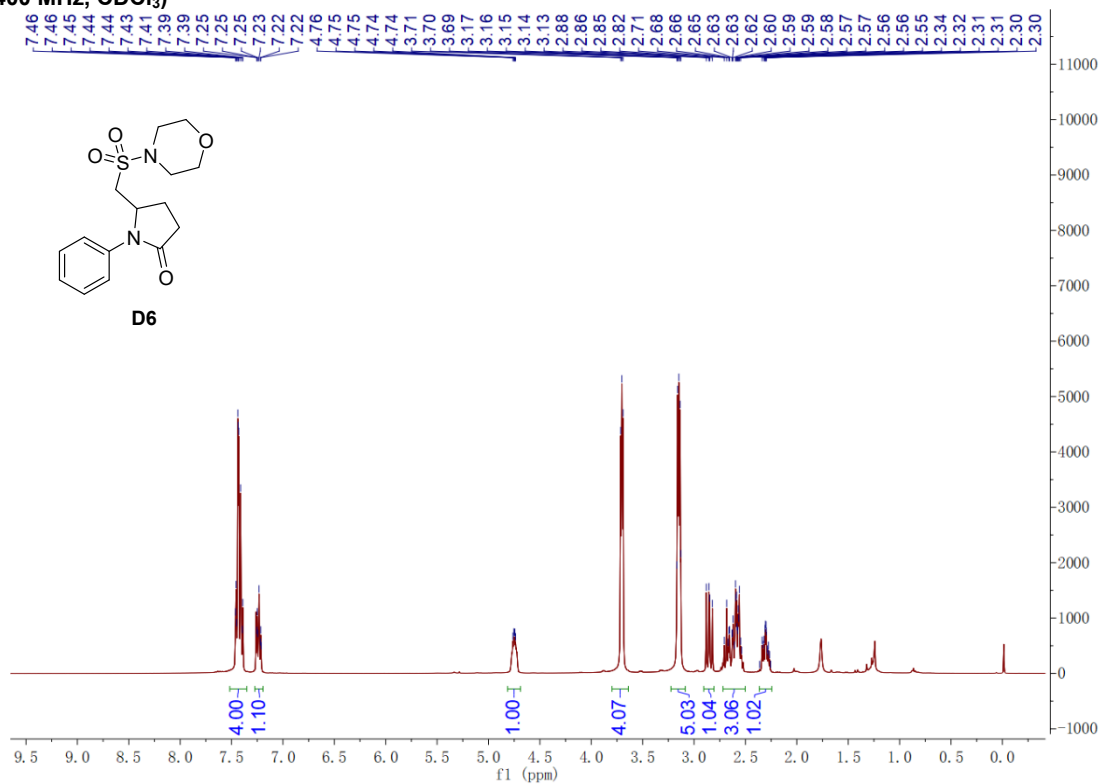

**<sup>13</sup>C-NMR (101 MHz, CDCl<sub>3</sub>)**

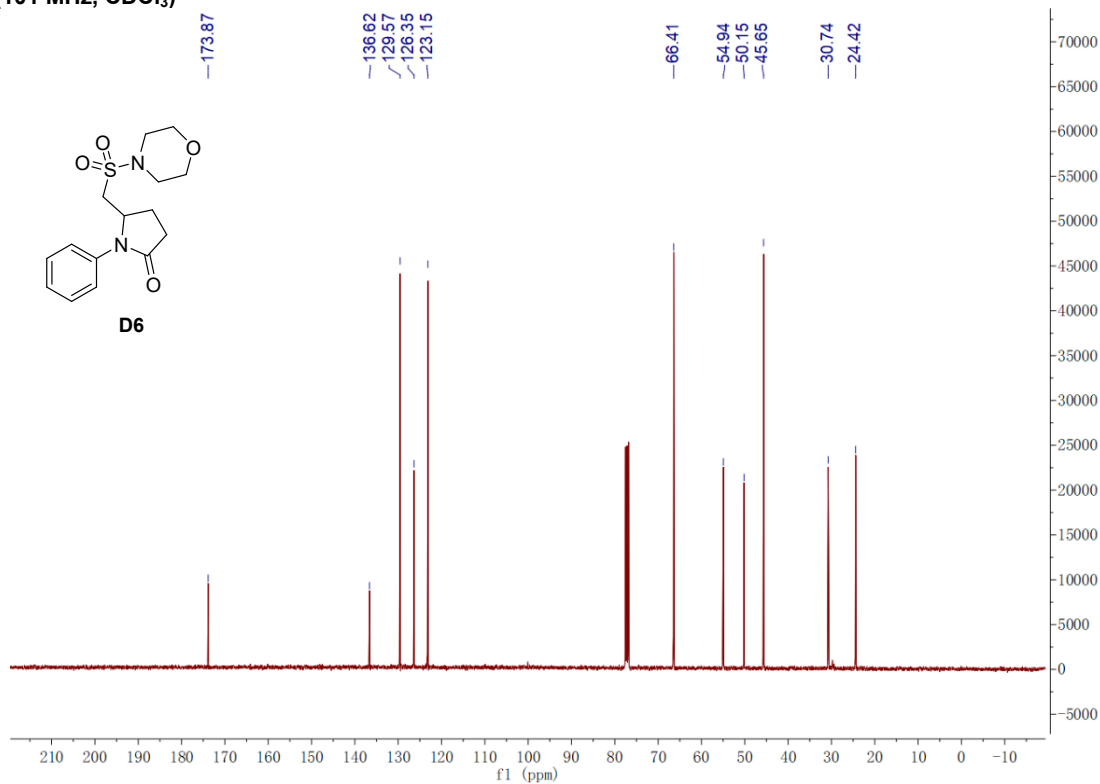

**<sup>1</sup>H-NMR (400 MHz, CDCl<sub>3</sub>)**

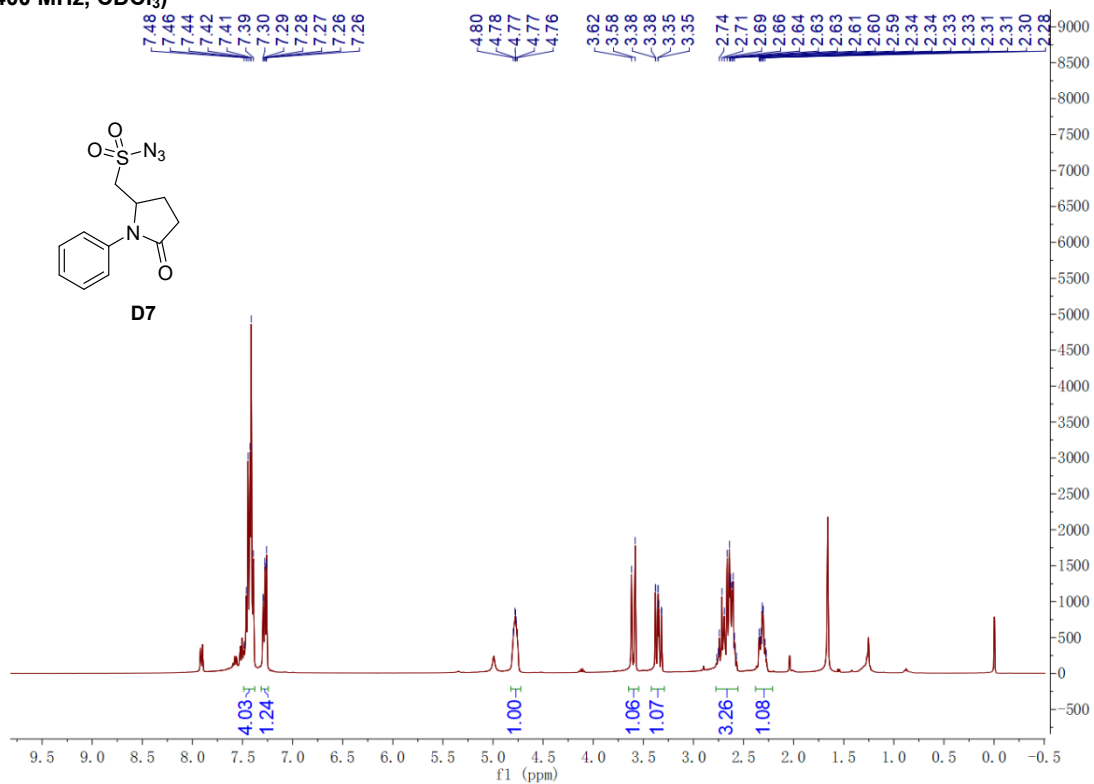

**<sup>13</sup>C-NMR (101 MHz, CDCl<sub>3</sub>)**

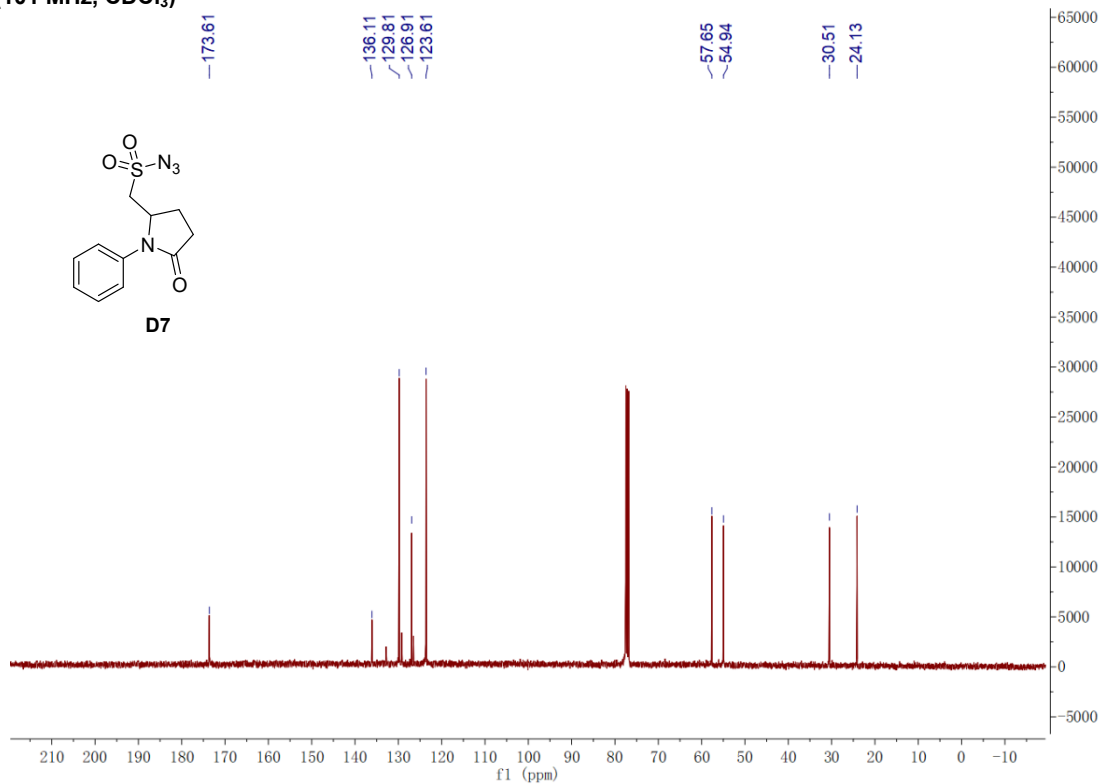

**<sup>1</sup>H-NMR (400 MHz, CDCl<sub>3</sub>)**

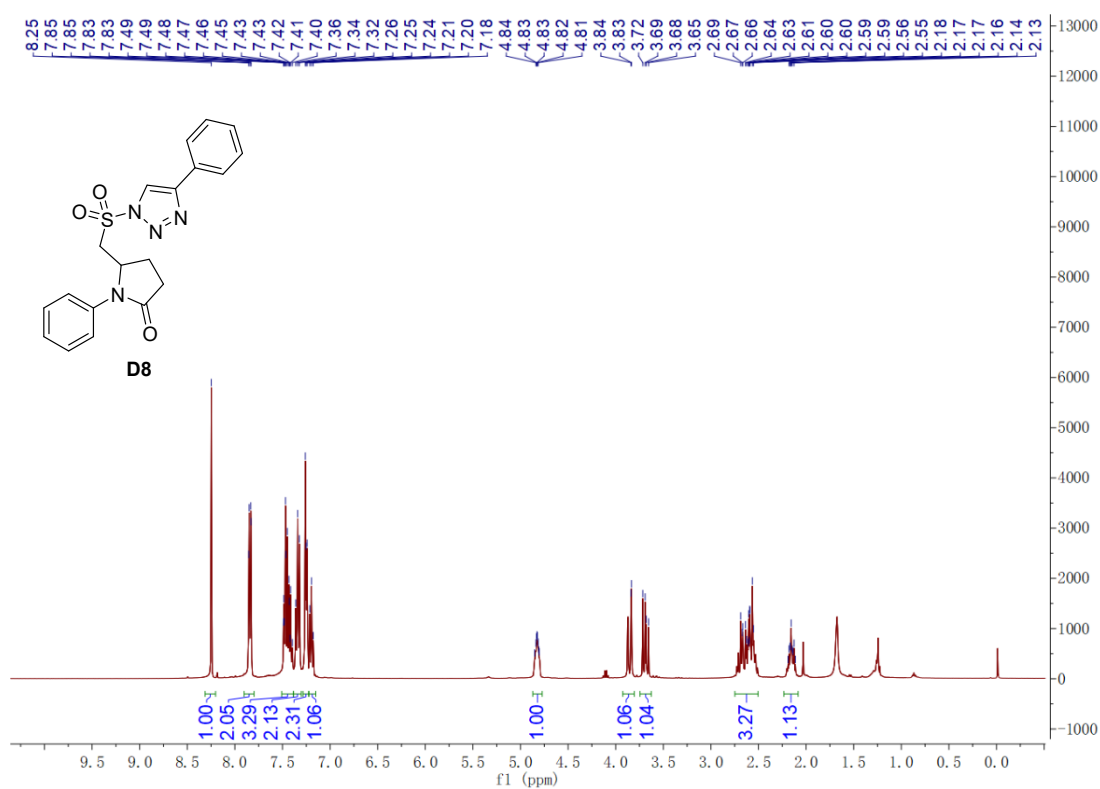

**<sup>13</sup>C-NMR (101 MHz, CDCl<sub>3</sub>)**

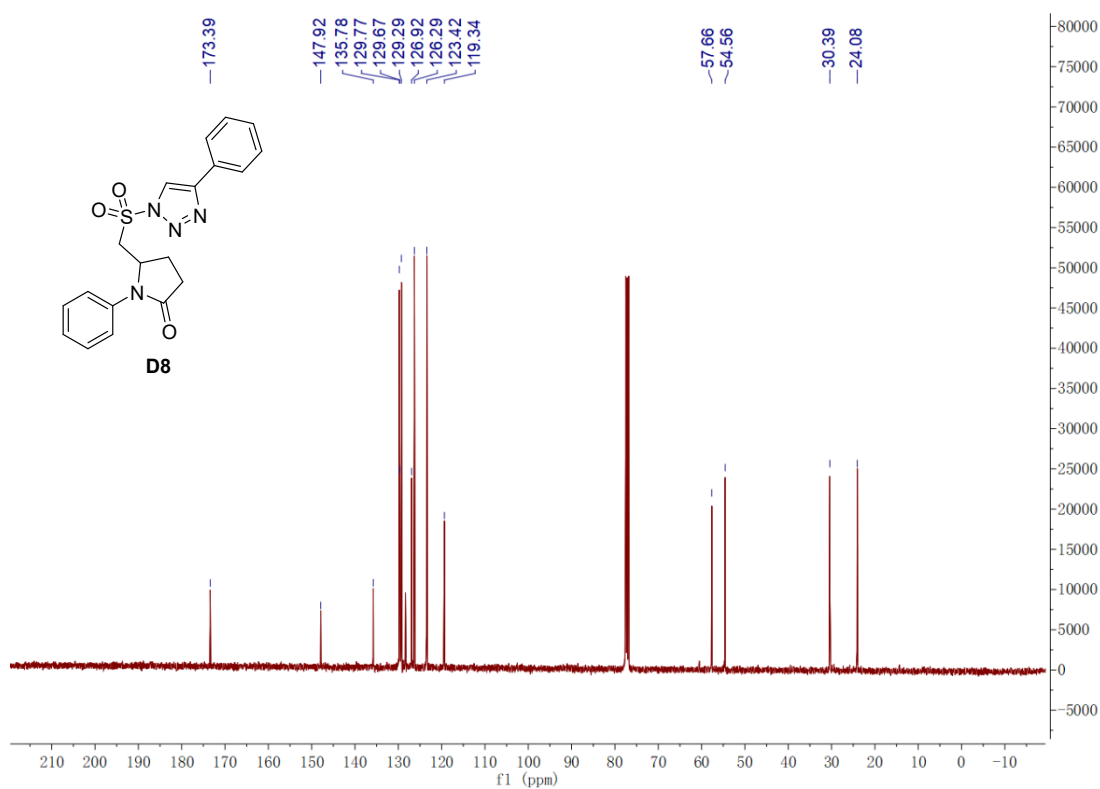

**<sup>1</sup>H-NMR (400 MHz, CDCl<sub>3</sub>)**

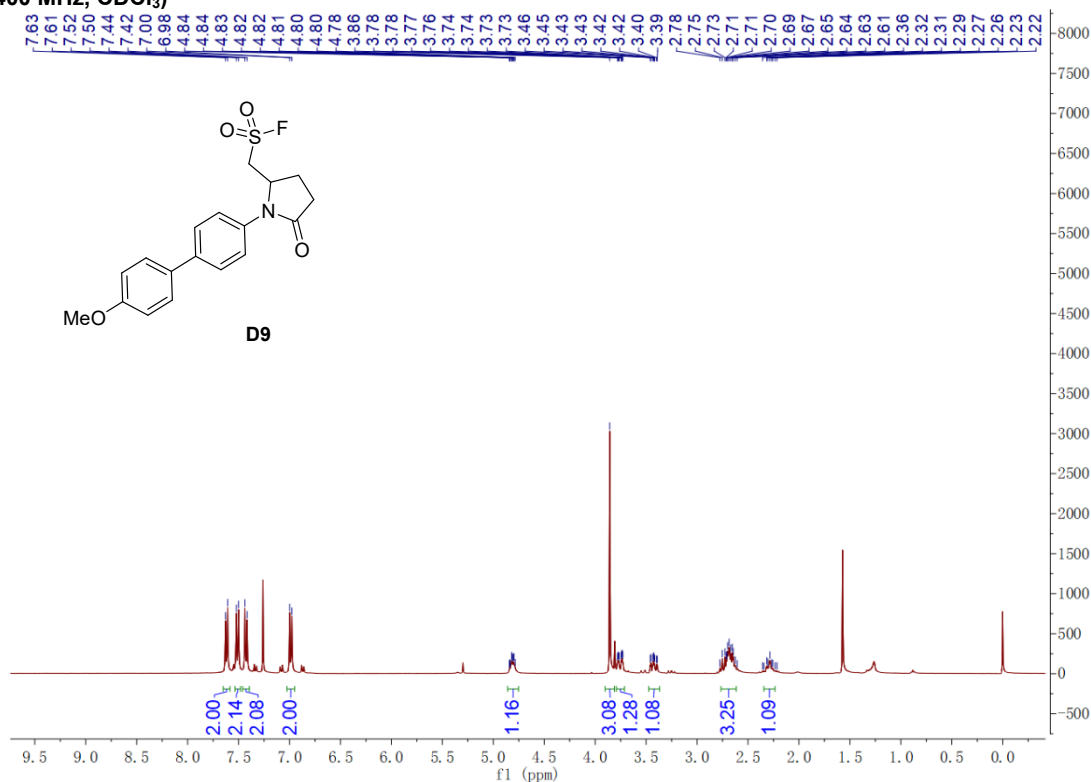

**<sup>13</sup>C-NMR (101 MHz, CDCl<sub>3</sub>)**

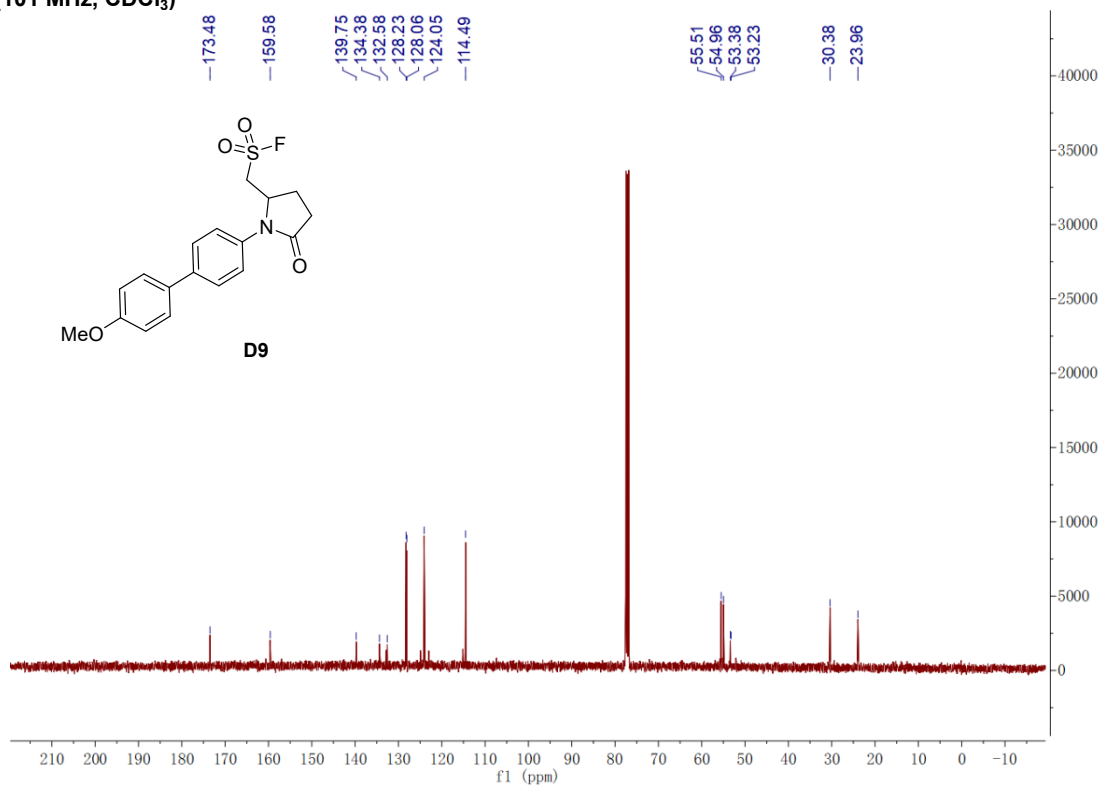



**<sup>19</sup>F NMR (376 MHz, CDCl<sub>3</sub>)**

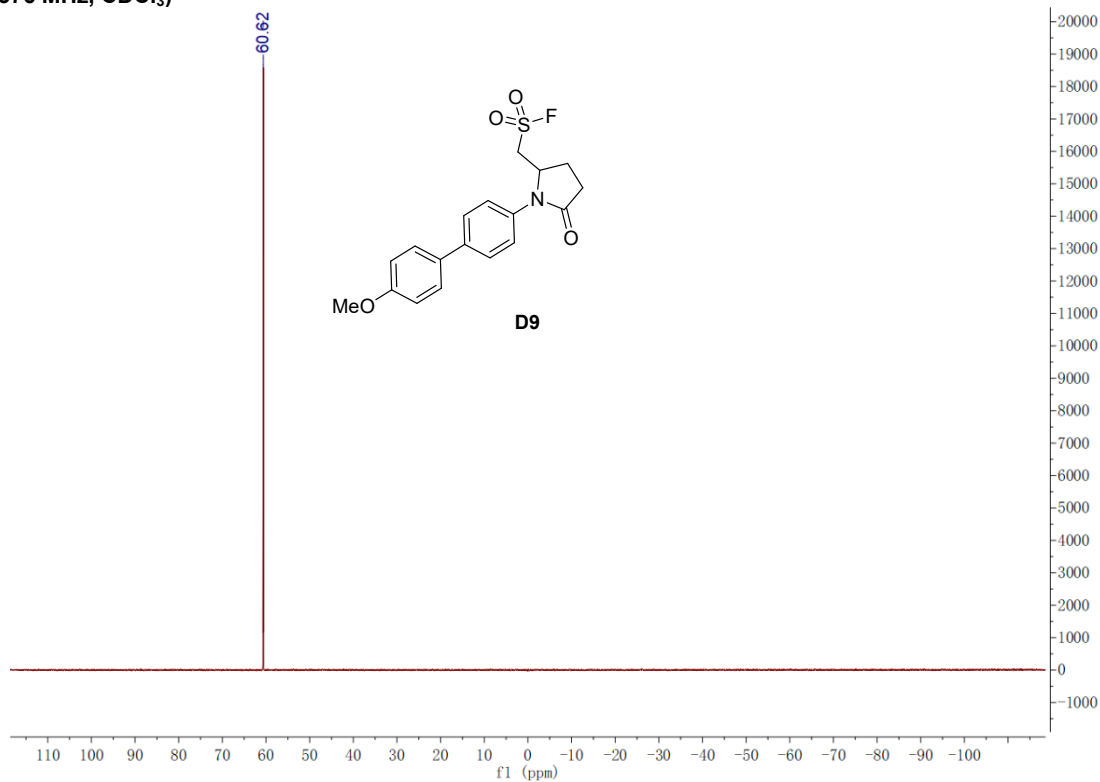<sup>1</sup>H-NMR (400 MHz, CDCl<sub>3</sub>)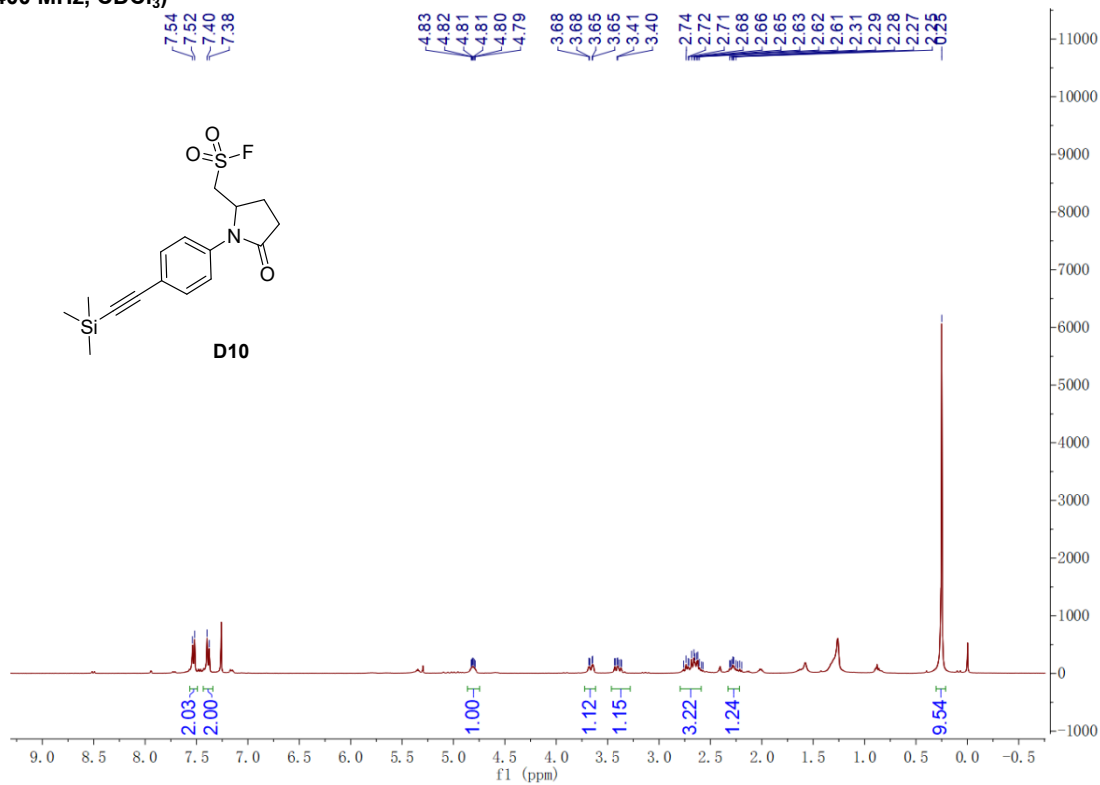

**<sup>13</sup>C-NMR (126 MHz, CDCl<sub>3</sub>)**

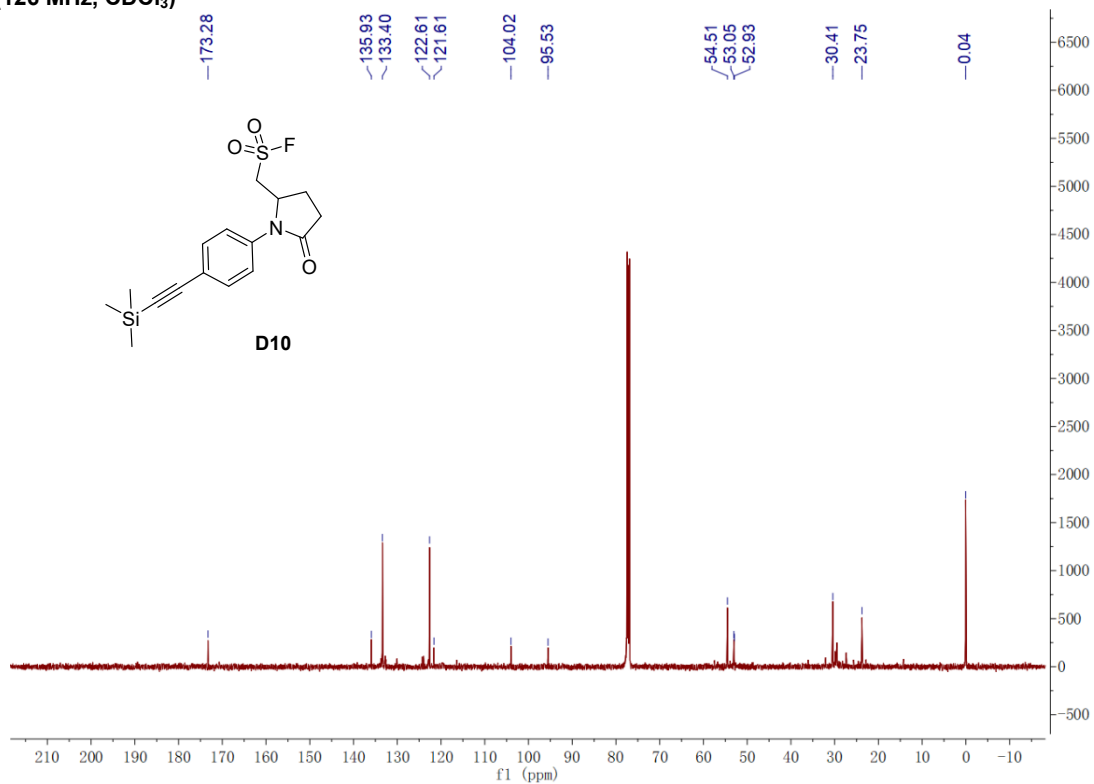

**<sup>19</sup>F NMR (376 MHz, CDCl<sub>3</sub>)**

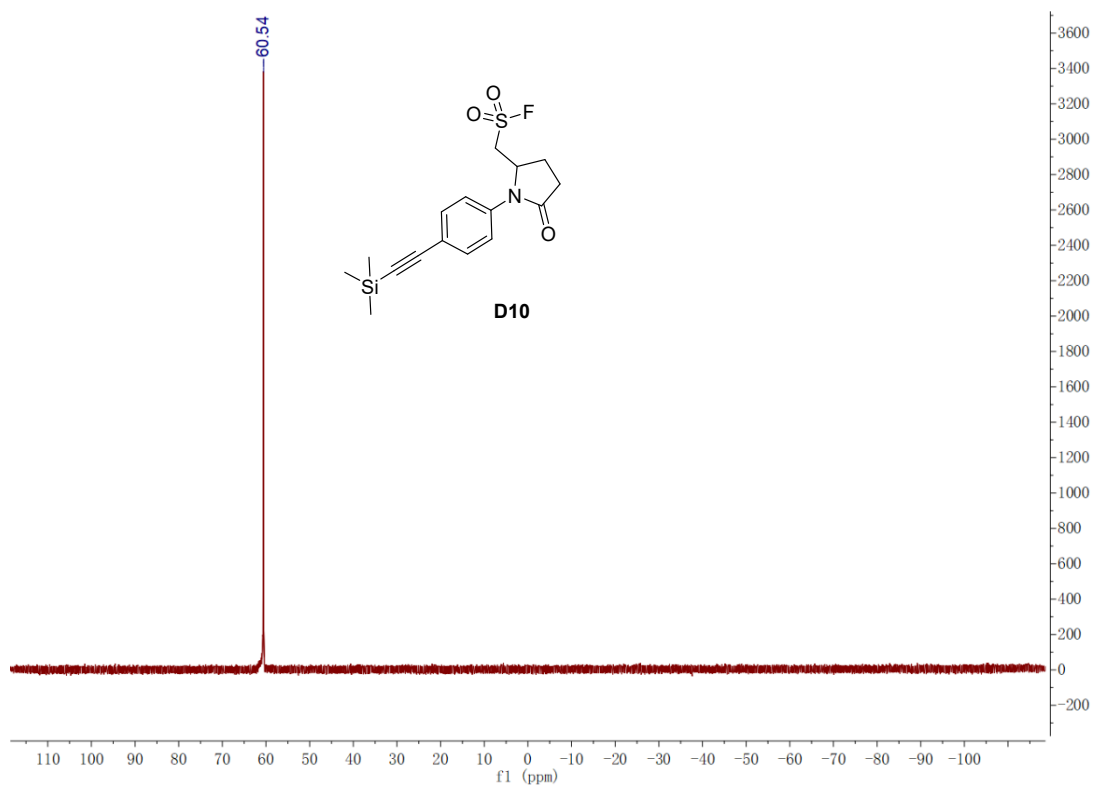

**<sup>1</sup>H-NMR (400 MHz, CDCl<sub>3</sub>)**

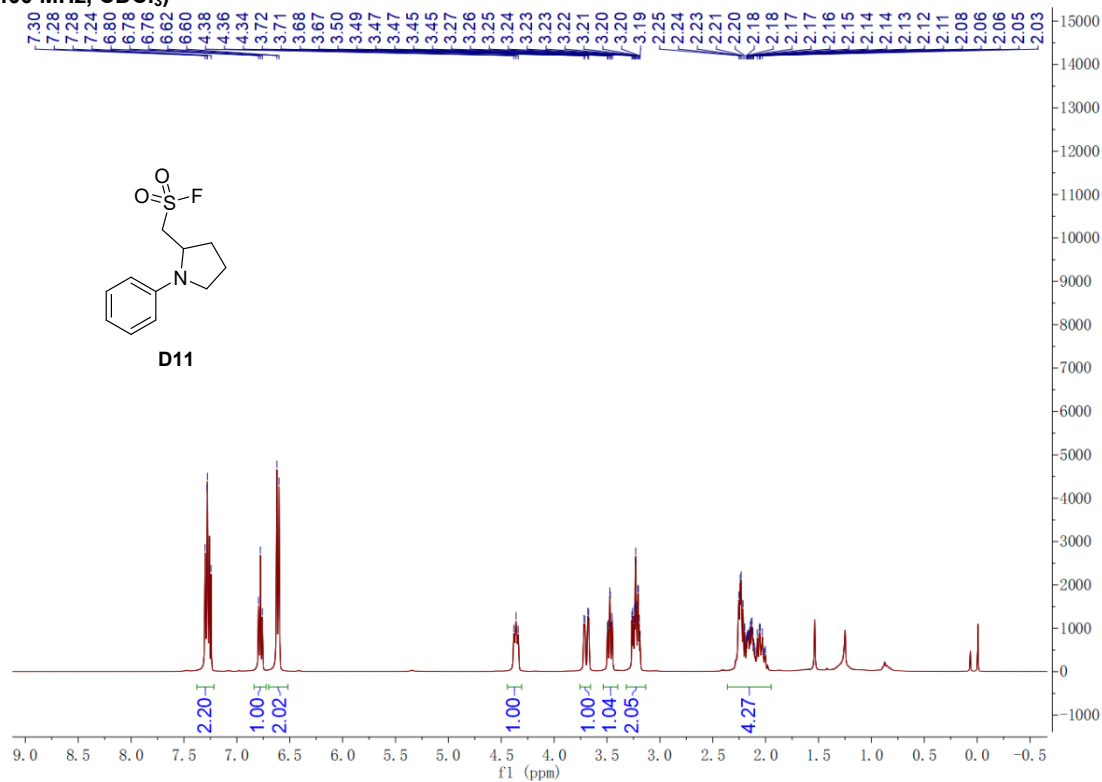

**<sup>13</sup>C-NMR (101 MHz, CDCl<sub>3</sub>)**

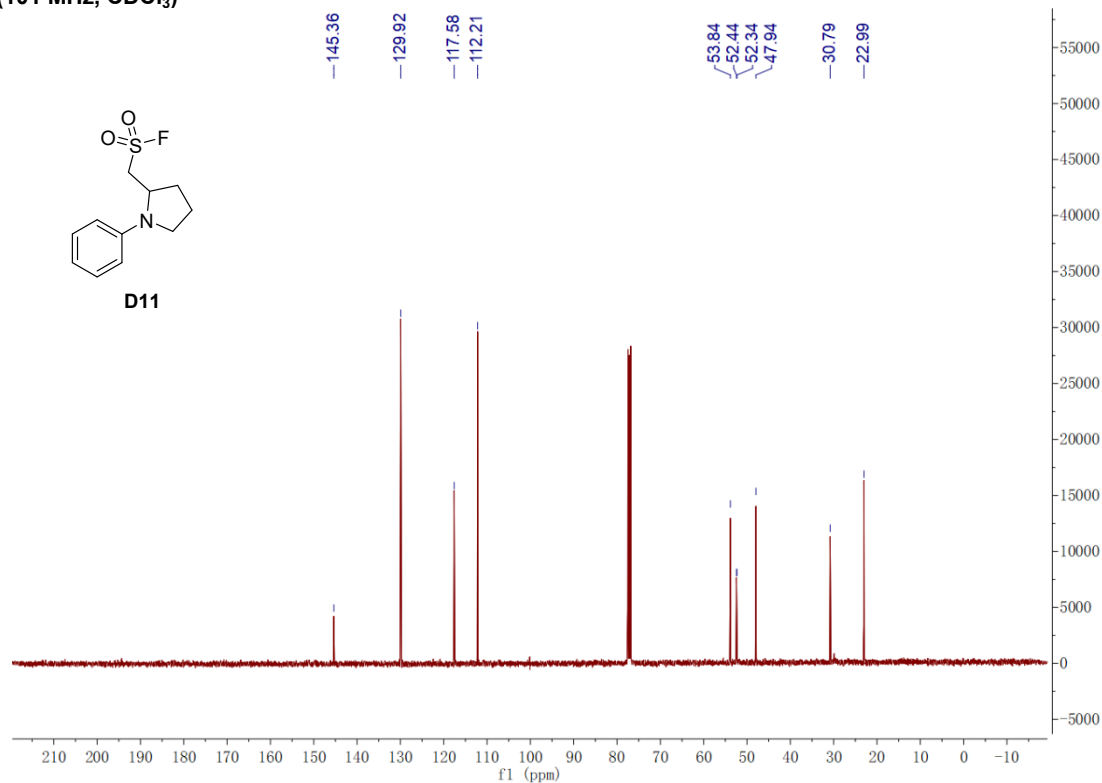

**<sup>19</sup>F NMR (376 MHz, CDCl<sub>3</sub>)**

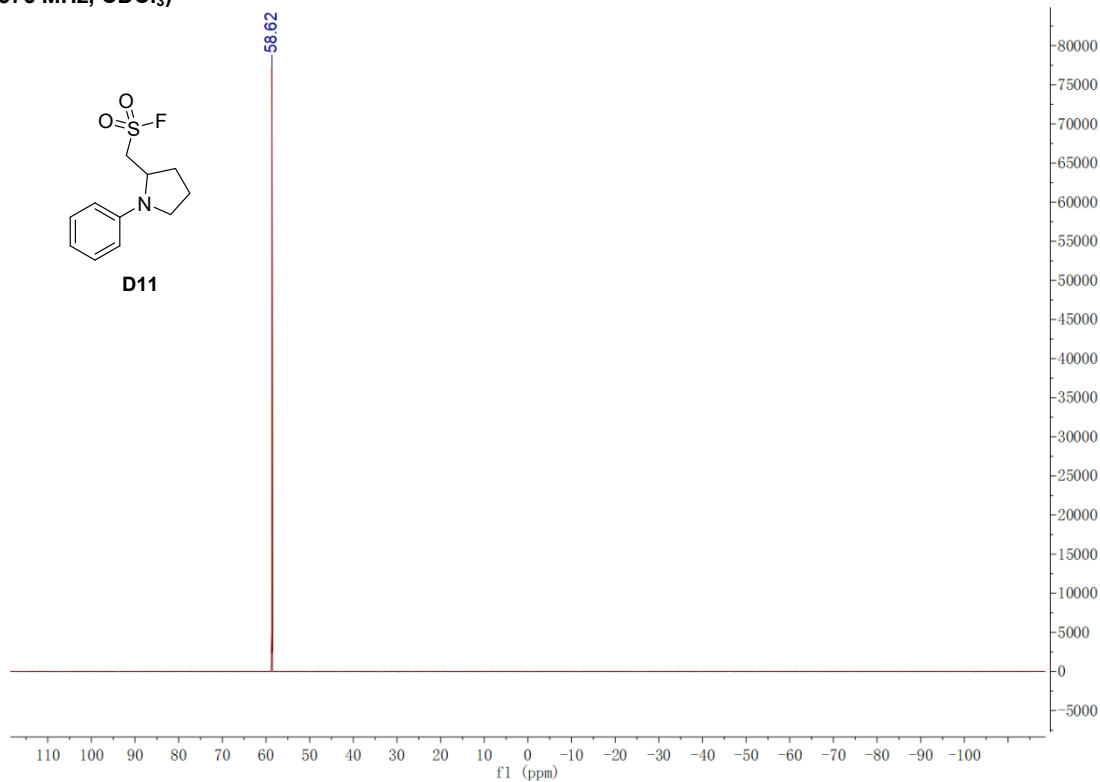

**<sup>1</sup>H-NMR (400 MHz, CDCl<sub>3</sub>)**

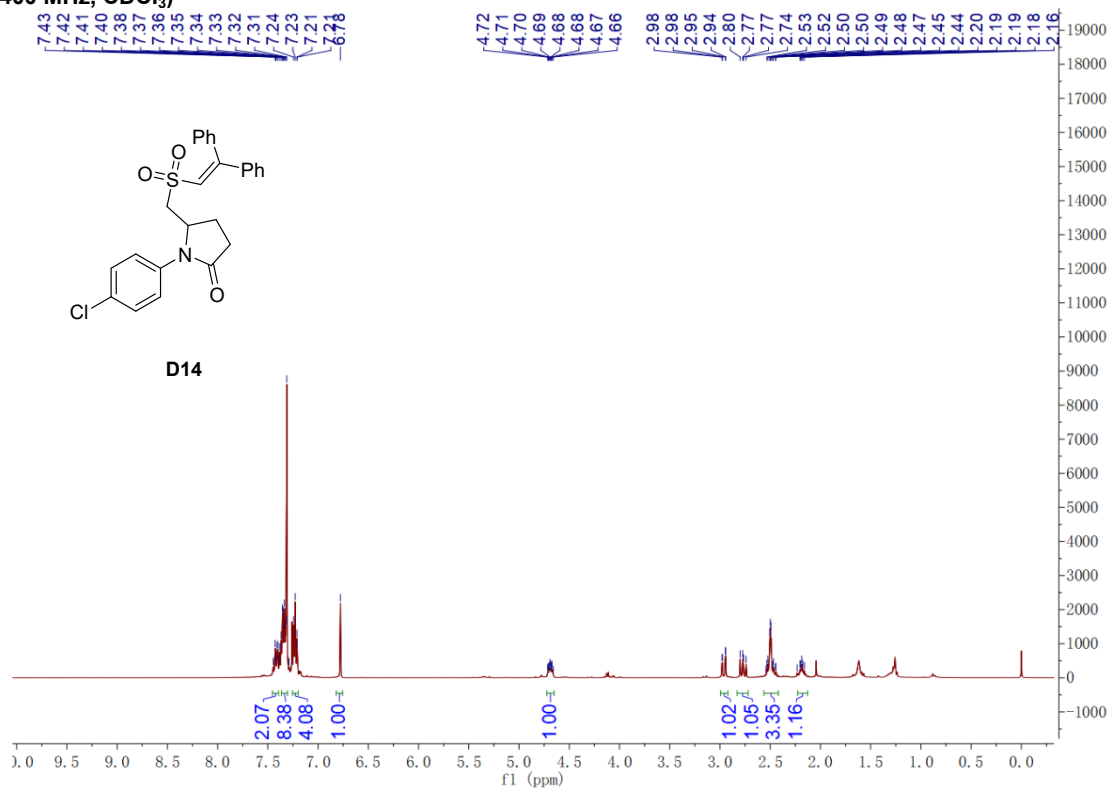

**<sup>13</sup>C-NMR (101 MHz, CDCl<sub>3</sub>)**

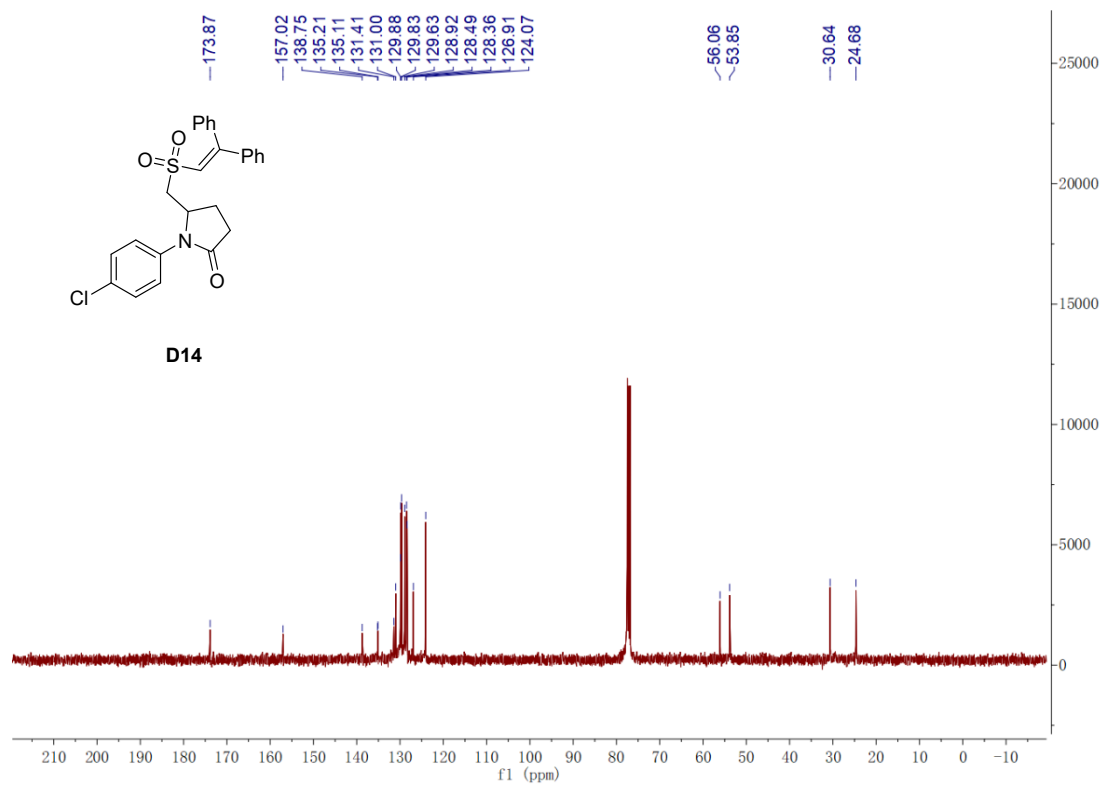

**<sup>1</sup>H-NMR (500 MHz, CDCl<sub>3</sub>)**

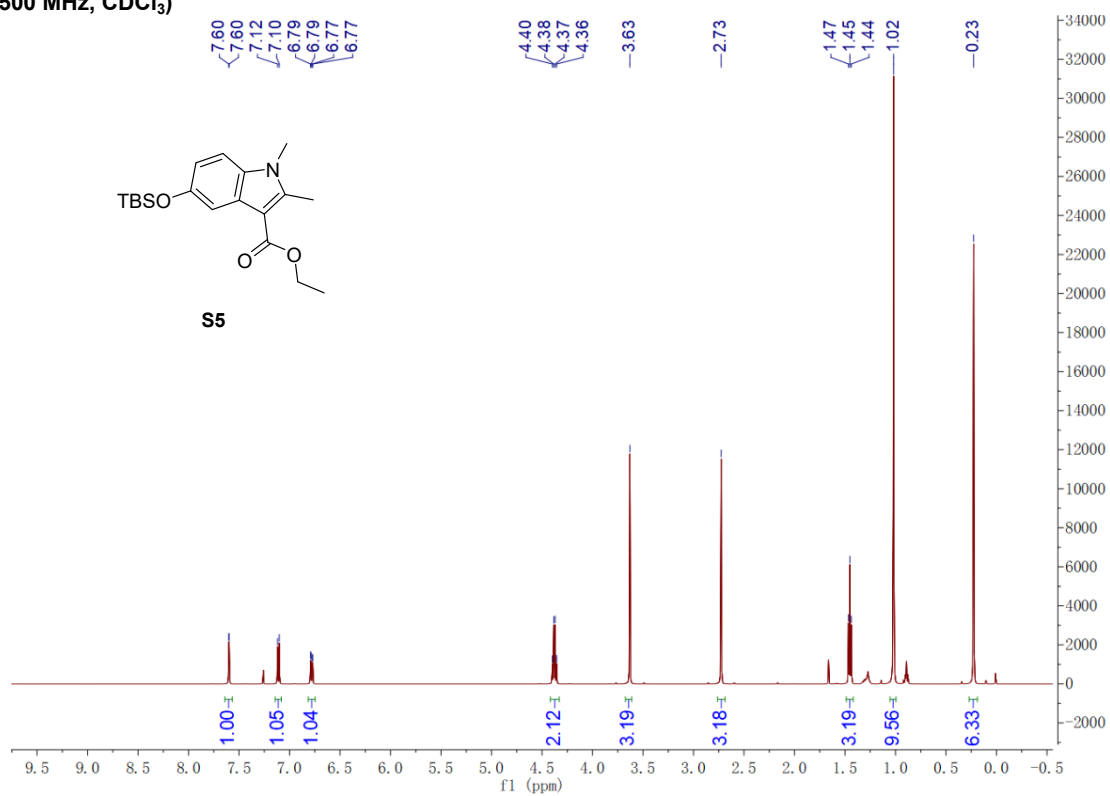

<sup>13</sup>C-NMR (126 MHz, CDCl<sub>3</sub>)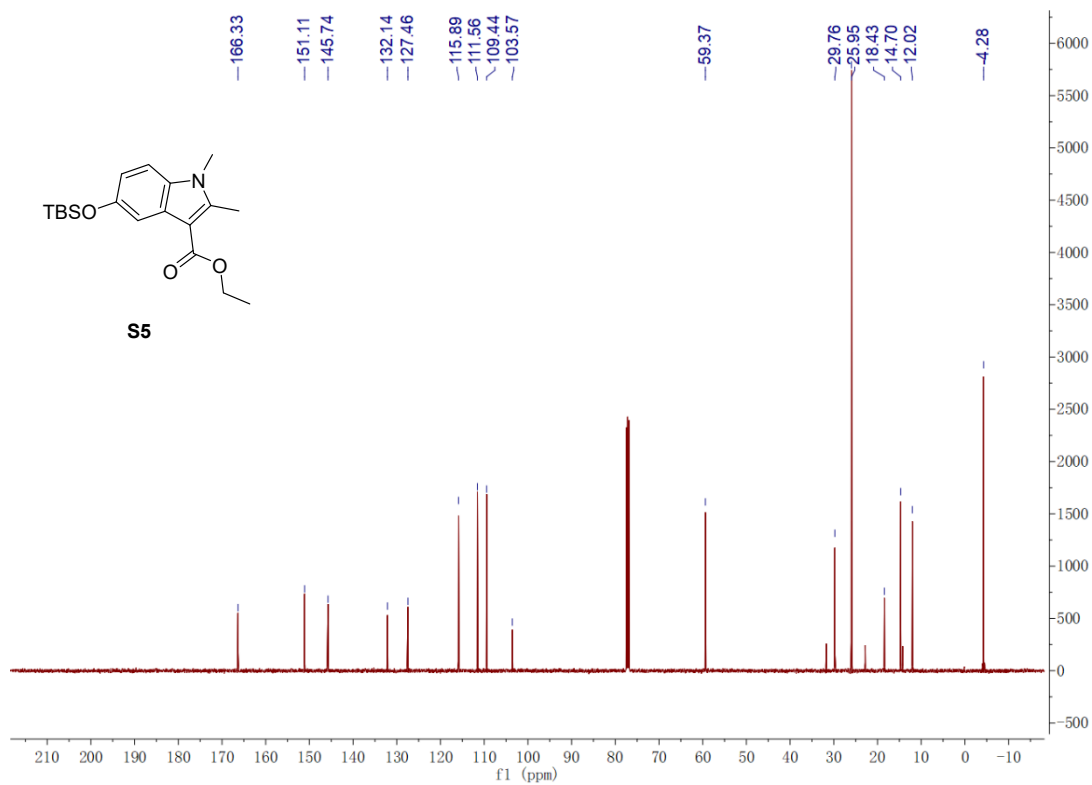

Supplement: d1sc02503a1.pdf [file d1sc02503a1.pdf]
